# Supplementary material for: Metabolic Pathway Pairwise-Based Signature as a Potential Non-Invasive Diagnostic Marker in AD patients
Source: Preprints.org preprint supplement (doi:10.20944/preprints202305.0837.v1), 2023-05-11
Supplement: Supplementary file 1 [file supplementary]

Archive with 3 entries (3 files):
- Supplenmentary Figures.pdf
- Table S1-8.xlsx
- Table S9-15.xlsx
