# Supplementary material for: Metabolic Pathway Pairwise-Based Signature as a Potential Non-Invasive Diagnostic Marker in AD patients
Source: Preprints.org preprint supplement (doi:10.20944/preprints202305.0837.v1), 2023-05-11
Supplement: Supplementary file 1 [file supplementary]

## Sheet: Table S9
Table S9. Differentially Expressed Genes between Subgroup1 (S1) and Subgroup2 (S2) Samples
SYMBOL	logFC	AveExpr	t	P.Value	adj.P.Val	B	change
NAT1	0.104776	7.06005	15.9878	1.42545e-46	1.9044e-42	94.9337	NOT
HERC4	0.159076	7.65048	10.6107	8.30109e-24	5.54513e-20	43.2977	NOT
DENND1C	-0.227733	8.40657	-10.3456	8.17778e-23	3.64184e-19	41.0487	DOWN
ZFAND1	0.160867	7.33312	10.2638	1.64556e-22	5.49616e-19	40.3614	NOT
ATAD1	0.167399	7.29309	10.211	2.57744e-22	6.16326e-19	39.9203	NOT
GPBP1	0.260243	7.95165	10.1963	2.91906e-22	6.16326e-19	39.798	UP
CHMP5	0.320025	7.63672	10.1844	3.22925e-22	6.16326e-19	39.6988	UP
C14orf129	0.19775	7.42706	10.0631	9.00276e-22	1.50346e-18	38.6913	UP
BET1	0.137509	7.21584	10.0367	1.12352e-21	1.66781e-18	38.4736	NOT
DCUN1D5	0.180524	7.34743	9.94225	2.47811e-21	3.31075e-18	37.6965	UP
ASNSD1	0.336861	8.36739	9.92262	2.91921e-21	3.54551e-18	37.5355	UP
ZNF83	0.26449	7.47407	9.89205	3.76579e-21	4.19258e-18	37.2854	UP
CCNT2	0.154413	7.37728	9.87095	4.48799e-21	4.51117e-18	37.1131	NOT
ANKRD49	0.296039	7.91804	9.8647	4.72728e-21	4.51117e-18	37.062	UP
MBNL1	0.483886	8.67981	9.83351	6.12383e-21	5.45429e-18	36.8078	UP
RPL31	0.757089	9.66181	9.78682	9.01275e-21	7.52564e-18	36.4282	UP
RPL39	0.63535	11.4798	9.7398	1.32849e-20	1.04404e-17	36.0472	UP
RWDD4A	0.163412	7.49938	9.71671	1.60661e-20	1.19247e-17	35.8605	NOT
ACTR6	0.273746	7.41616	9.66532	2.45009e-20	1.7228e-17	35.4461	UP
SOLH	-0.246308	8.14879	-9.60724	3.94031e-20	2.63213e-17	34.9796	DOWN
KTN1	0.206106	7.26559	9.58317	4.79508e-20	2.86111e-17	34.7869	UP
SLK	0.196553	7.70772	9.58139	4.86543e-20	2.86111e-17	34.7726	UP
FAM76B	0.255271	7.64431	9.57836	4.98671e-20	2.86111e-17	34.7484	UP
SUB1	0.258108	7.43049	9.57465	5.13972e-20	2.86111e-17	34.7187	UP
TMEM106B	0.171691	7.18666	9.54557	6.51244e-20	3.37108e-17	34.4863	NOT
TMEM126A	0.232929	7.6502	9.54466	6.56048e-20	3.37108e-17	34.4791	UP
ZFR	0.2608	8.11512	9.50187	9.28521e-20	4.59446e-17	34.1381	UP
PSMA2	0.166293	7.28663	9.49136	1.01102e-19	4.82399e-17	34.0546	NOT
TLK1	0.184335	7.38403	9.47835	1.12338e-19	5.17528e-17	33.9511	UP
ORMDL1	0.180351	7.80893	9.4615	1.28737e-19	5.58528e-17	33.8174	UP
SAMD9	0.35622	8.77139	9.46067	1.29598e-19	5.58528e-17	33.8108	UP
DNM2	-0.215944	8.87155	-9.45089	1.40253e-19	5.85557e-17	33.7333	DOWN
RPS17	0.629411	10.6729	9.43572	1.5853e-19	6.41807e-17	33.613	UP
AKNA	-0.234367	10.6953	-9.4273	1.69658e-19	6.59291e-17	33.5464	DOWN
C6orf211	0.0755298	7.07982	9.42509	1.72718e-19	6.59291e-17	33.5289	NOT
SNX13	0.151057	7.35183	9.40345	2.05595e-19	7.62172e-17	33.3579	NOT
ZNF17	0.143484	7.37312	9.40018	2.11081e-19	7.62172e-17	33.332	NOT
SUPT5H	-0.214435	8.55759	-9.38846	2.31954e-19	7.82545e-17	33.2395	DOWN
ANKRD12	0.326128	8.10813	9.38816	2.3251e-19	7.82545e-17	33.2371	UP
RAVER1	-0.178192	7.94622	-9.38721	2.34295e-19	7.82545e-17	33.2296	DOWN
ANKMY2	0.136482	7.40424	9.34891	3.18628e-19	1.03826e-16	32.9279	NOT
SNX4	0.161221	7.19617	9.34378	3.32017e-19	1.05613e-16	32.8875	NOT
KRCC1	0.208522	7.57233	9.3392	3.44418e-19	1.06927e-16	32.8515	UP
RPL26	0.715975	8.69465	9.33643	3.52154e-19	1.06927e-16	32.8297	UP
GIMAP2	0.317817	7.52658	9.31985	4.02145e-19	1.18816e-16	32.6995	UP
ATP5C1	0.364302	8.16208	9.31684	4.11933e-19	1.18816e-16	32.6759	UP
FAM122B	0.229947	7.66177	9.31502	4.1799e-19	1.18816e-16	32.6616	UP
RPL21	0.642957	9.87943	9.29926	4.74095e-19	1.31957e-16	32.538	UP
MCEE	0.207747	7.69057	9.24947	7.05171e-19	1.92267e-16	32.1484	UP
ARL8B	0.233503	8.4955	9.24092	7.54796e-19	2.01681e-16	32.0817	UP
ABCE1	0.217947	7.58989	9.21201	9.49688e-19	2.39029e-16	31.8563	UP
OXR1	0.380284	8.15363	9.21056	9.60748e-19	2.39029e-16	31.845	UP
RB1CC1	0.299189	8.07868	9.20933	9.70153e-19	2.39029e-16	31.8354	UP
SMAD5	0.219346	7.65085	9.20846	9.76861e-19	2.39029e-16	31.8287	UP
VPS36	0.308266	7.96471	9.20754	9.84027e-19	2.39029e-16	31.8215	UP
NDFIP1	0.152159	7.429	9.20141	1.03305e-18	2.46456e-16	31.7738	NOT
ANKRD46	0.196113	7.43512	9.19659	1.07326e-18	2.51558e-16	31.7363	UP
RPS24	0.632824	10.2111	9.1894	1.13625e-18	2.6173e-16	31.6804	UP
DR1	0.268477	7.55307	9.18486	1.17783e-18	2.64438e-16	31.6451	UP
AZIN1	0.18653	7.89099	9.18382	1.1876e-18	2.64438e-16	31.637	UP
ACN9	0.176962	7.60648	9.14835	1.57222e-18	3.42703e-16	31.3618	NOT
ZNF230	0.0915715	7.19141	9.14616	1.59965e-18	3.42703e-16	31.3448	NOT
DCP2	0.364594	9.22216	9.14464	1.61902e-18	3.42703e-16	31.333	UP
ANAPC10	0.134589	7.19369	9.14288	1.64169e-18	3.42703e-16	31.3194	NOT
NOC3L	0.213936	7.29018	9.12753	1.85319e-18	3.80901e-16	31.2005	UP
DDX41	-0.165263	8.37739	-9.11954	1.97364e-18	3.99512e-16	31.1388	NOT
KPNA3	0.196373	7.60593	9.11127	2.10656e-18	4.20053e-16	31.0748	UP
PTPLB	0.284155	7.96813	9.10201	2.26586e-18	4.36275e-16	31.0033	UP
ATG3	0.176602	8.23704	9.10185	2.26882e-18	4.36275e-16	31.002	NOT
PDIK1L	0.115052	7.17188	9.1009	2.28587e-18	4.36275e-16	30.9947	NOT
MRPL50	0.211043	7.36498	9.09402	2.41294e-18	4.54041e-16	30.9416	UP
COMMD8	0.28343	7.63004	9.07335	2.83869e-18	5.26734e-16	30.7823	UP
AKAP11	0.266922	7.75224	9.07043	2.90464e-18	5.3159e-16	30.7597	UP
GPS2	-0.209063	8.65197	-9.06853	2.94828e-18	5.32285e-16	30.7451	DOWN
SMEK2	0.23918	8.15457	9.05987	3.15563e-18	5.62124e-16	30.6784	UP
RAP1B	0.194499	7.32641	9.0569	3.23003e-18	5.67805e-16	30.6556	UP
SF3B2	-0.227299	9.49993	-9.05307	3.32849e-18	5.73534e-16	30.6261	DOWN
TMEM39A	0.0867911	7.18594	9.04947	3.4238e-18	5.73534e-16	30.5985	NOT
UPF1	-0.20003	8.41165	-9.049	3.43663e-18	5.73534e-16	30.5948	DOWN
CCDC76	0.236998	7.48721	9.04846	3.45115e-18	5.73534e-16	30.5907	UP
NDUFA4	0.530022	9.18104	9.0475	3.47727e-18	5.73534e-16	30.5833	UP
KIAA1826	0.177385	7.45397	9.03682	3.78071e-18	6.15979e-16	30.5012	NOT
DYNLT3	0.204029	7.47372	9.02111	4.27535e-18	6.80512e-16	30.3806	UP
VBP1	0.269503	8.07774	9.02102	4.27867e-18	6.80512e-16	30.3799	UP
VTA1	0.109547	7.24086	9.0193	4.33654e-18	6.81602e-16	30.3667	NOT
SELO	-0.15102	8.17258	-9.00974	4.67316e-18	7.2597e-16	30.2934	NOT
CSNK1G3	0.146666	7.3294	9.00266	4.93895e-18	7.58441e-16	30.2391	NOT
COMMD10	0.191727	7.49429	8.9955	5.22321e-18	7.92979e-16	30.1843	UP
ORC3L	0.134837	7.58638	8.98915	5.48837e-18	8.23872e-16	30.1357	NOT
SCOC	0.164377	7.13486	8.98323	5.74805e-18	8.53266e-16	30.0904	NOT
CSNK2B	-0.206225	10.4709	-8.97529	6.1153e-18	8.97807e-16	30.0296	DOWN
DEK	0.360291	8.16482	8.95784	7.00591e-18	1.01738e-15	29.8963	UP
PSMA6	0.33095	8.25997	8.9472	7.61087e-18	1.09335e-15	29.8151	UP
SLC35B3	0.169015	7.47989	8.94496	7.74431e-18	1.10068e-15	29.7981	NOT
ZNF614	0.115776	7.31815	8.94309	7.85794e-18	1.10507e-15	29.7838	NOT
PNPLA8	0.170744	7.33411	8.93335	8.47634e-18	1.17962e-15	29.7095	NOT
TAF7	0.274613	8.06283	8.92737	8.87897e-18	1.22292e-15	29.664	UP
RPS3A	0.705884	10.0777	8.92406	9.1101e-18	1.24195e-15	29.6388	UP
CMPK1	0.316121	7.98448	8.91885	9.48668e-18	1.28022e-15	29.5991	UP
FAM134B	0.16692	7.21467	8.9129	9.93468e-18	1.32727e-15	29.5539	NOT
ARHGDIA	-0.225388	9.94119	-8.89743	1.12009e-17	1.48163e-15	29.4363	DOWN
SKIV2L2	0.172285	7.54956	8.88744	1.21025e-17	1.58519e-15	29.3604	NOT
ENPP4	0.167929	7.2344	8.87909	1.29103e-17	1.67458e-15	29.297	NOT
RALY	-0.21476	9.5618	-8.87103	1.37412e-17	1.76521e-15	29.2359	DOWN
VAMP7	0.235368	8.42645	8.86443	1.44602e-17	1.83988e-15	29.1859	UP
MRPL3	0.201428	7.60551	8.84927	1.62571e-17	2.049e-15	29.0711	UP
JAK2	0.182392	7.50959	8.83068	1.87643e-17	2.34291e-15	28.9305	UP
MTFR1	0.0701287	7.04765	8.82914	1.89876e-17	2.34883e-15	28.9189	NOT
MVP	-0.225738	9.55239	-8.82483	1.96291e-17	2.40591e-15	28.8863	DOWN
SIRT1	0.20759	7.52894	8.82292	1.99197e-17	2.41933e-15	28.8719	UP
C4orf33	0.150727	7.28089	8.81645	2.09378e-17	2.52008e-15	28.823	NOT
BRD3	-0.233536	8.88724	-8.80895	2.21815e-17	2.63527e-15	28.7665	DOWN
OMA1	0.143528	7.4697	8.80832	2.22894e-17	2.63527e-15	28.7617	NOT
KIAA2013	-0.206196	9.11424	-8.79834	2.4069e-17	2.82072e-15	28.6864	DOWN
PCMT1	0.292764	9.52456	8.77377	2.90681e-17	3.37695e-15	28.5015	UP
PGM2	0.170571	7.57179	8.7621	3.17906e-17	3.6614e-15	28.4137	NOT
NAP1L1	0.235774	8.05464	8.75897	3.25619e-17	3.68677e-15	28.3902	UP
IFNG	0.102811	7.05213	8.75897	3.25628e-17	3.68677e-15	28.3902	NOT
AZI2	0.171364	7.4775	8.75736	3.29671e-17	3.69691e-15	28.3781	NOT
CRBN	0.318114	8.60111	8.75642	3.32057e-17	3.69691e-15	28.371	UP
TXNDC9	0.168219	7.14867	8.75396	3.38374e-17	3.7361e-15	28.3526	NOT
MYNN	0.175754	7.43759	8.74546	3.61135e-17	3.95472e-15	28.2888	NOT
FBXL3	0.184958	7.38079	8.74304	3.67896e-17	3.996e-15	28.2706	UP
ZNF518A	0.196029	7.59899	8.73651	3.86743e-17	4.1549e-15	28.2216	UP
RAP2A	0.294209	7.85093	8.73515	3.90779e-17	4.1549e-15	28.2115	UP
ARV1	0.136567	7.41573	8.73479	3.91855e-17	4.1549e-15	28.2088	NOT
C14orf135	0.16868	7.75114	8.72268	4.29883e-17	4.52223e-15	28.118	NOT
FOXN2	0.344612	8.94578	8.71239	4.65019e-17	4.85364e-15	28.041	UP
UFM1	0.155978	7.44341	8.70861	4.78652e-17	4.9572e-15	28.0127	NOT
RPL7	0.406547	7.75417	8.70024	5.10216e-17	5.22372e-15	27.9501	UP
EFHA1	0.29223	8.3806	8.69973	5.12206e-17	5.22372e-15	27.9463	UP
ITGAV	0.12072	7.18611	8.69448	5.33142e-17	5.39605e-15	27.907	NOT
ZNF800	0.24329	7.89753	8.68907	5.55576e-17	5.58083e-15	27.8667	UP
AP1S2	0.41894	10.1779	8.68607	5.68436e-17	5.63169e-15	27.8442	UP
DUSP11	0.106939	7.70157	8.68592	5.6907e-17	5.63169e-15	27.8431	NOT
GMFB	0.291318	8.28932	8.68199	5.86356e-17	5.76009e-15	27.8138	UP
LY96	0.519386	8.61829	8.67914	5.99234e-17	5.84362e-15	27.7925	UP
VPS39	-0.136513	7.84685	-8.67754	6.066e-17	5.87259e-15	27.7806	NOT
FASTKD1	0.103023	7.23331	8.67468	6.19926e-17	5.92252e-15	27.7593	NOT
PCNP	0.373068	9.18873	8.67454	6.20623e-17	5.92252e-15	27.7582	UP
KPNA6	-0.233721	9.37996	-8.67201	6.32684e-17	5.99479e-15	27.7393	DOWN
BTAF1	0.341606	8.58304	8.66743	6.55113e-17	6.1636e-15	27.7052	UP
PIGT	-0.125408	8.41202	-8.65916	6.97616e-17	6.49509e-15	27.6436	NOT
TXNDC17	0.301465	8.69526	8.6587	7.0007e-17	6.49509e-15	27.6401	UP
REEP5	0.339597	9.21871	8.65655	7.11627e-17	6.55678e-15	27.6241	UP
MTX2	0.145136	7.21665	8.65182	7.37685e-17	6.75033e-15	27.5889	NOT
ZNF451	0.136715	7.42672	8.64754	7.62059e-17	6.92593e-15	27.557	NOT
ATP6V1G1	0.368752	9.42994	8.64656	7.67743e-17	6.93044e-15	27.5497	UP
LEMD3	0.275075	8.07462	8.63731	8.2359e-17	7.38467e-15	27.4809	UP
DCTN6	0.0988868	7.15615	8.63323	8.49483e-17	7.53311e-15	27.4506	NOT
TMEM209	0.215987	7.72963	8.63293	8.51421e-17	7.53311e-15	27.4484	UP
PTPN22	0.22457	7.43705	8.62454	9.07383e-17	7.97542e-15	27.386	UP
IBTK	0.185959	7.34332	8.61904	9.45967e-17	8.2301e-15	27.3452	UP
VAMP4	0.147793	7.44453	8.61867	9.4868e-17	8.2301e-15	27.3424	NOT
CSTF2T	0.101492	7.17265	8.61591	9.68707e-17	8.34963e-15	27.3219	NOT
PSMD10	0.225003	8.202	8.61014	1.01199e-16	8.66681e-15	27.2791	UP
MGAT1	-0.199758	10.4972	-8.60638	1.04121e-16	8.86027e-15	27.2512	DOWN
SHPRH	0.105827	7.16383	8.59518	1.13324e-16	9.58233e-15	27.1683	NOT
HNRNPUL2	-0.225371	9.22931	-8.59406	1.14289e-16	9.60319e-15	27.1599	DOWN
KLHL9	0.217318	7.91096	8.58652	1.20999e-16	1.01034e-14	27.1041	UP
CLK4	0.226594	7.47633	8.58496	1.22431e-16	1.01106e-14	27.0925	UP
PCMTD1	0.328777	8.16766	8.58478	1.22598e-16	1.01106e-14	27.0912	UP
SFRS15	-0.163017	8.15408	-8.57913	1.27944e-16	1.04867e-14	27.0494	NOT
FAM133B	0.151236	7.37954	8.57802	1.29019e-16	1.05104e-14	27.0412	NOT
AGA	0.151701	7.38725	8.57681	1.30208e-16	1.05429e-14	27.0322	NOT
NR1H2	-0.179444	8.62084	-8.56984	1.37238e-16	1.10452e-14	26.9807	DOWN
PI4K2B	0.0933232	7.1245	8.56606	1.41206e-16	1.12965e-14	26.9528	NOT
VPS54	0.0949548	7.18494	8.56527	1.42061e-16	1.12972e-14	26.9469	NOT
ZZZ3	0.170891	7.44309	8.5551	1.53381e-16	1.21253e-14	26.8718	NOT
RBM42	-0.18752	8.87072	-8.53777	1.74773e-16	1.37351e-14	26.7439	DOWN
INSIG2	0.149432	7.45284	8.53642	1.7655e-16	1.37936e-14	26.734	NOT
TMEM30A	0.161293	7.60933	8.5277	1.88526e-16	1.45747e-14	26.6697	NOT
RPS27	0.464555	13.0727	8.52755	1.88729e-16	1.45747e-14	26.6686	UP
RPL17	0.525514	9.31452	8.52034	1.99253e-16	1.52989e-14	26.6155	UP
HLTF	0.0935662	7.16684	8.51877	2.01609e-16	1.53914e-14	26.604	NOT
LZTFL1	0.0921224	7.09351	8.51123	2.13364e-16	1.61963e-14	26.5485	NOT
TMCO1	0.366063	8.8936	8.5094	2.16309e-16	1.6327e-14	26.535	UP
ACBD3	0.190512	7.90132	8.50311	2.26779e-16	1.70212e-14	26.4887	UP
SNRPG	0.443893	9.05283	8.49633	2.38605e-16	1.78087e-14	26.4389	UP
MRPL32	0.223913	7.92568	8.4951	2.4082e-16	1.78742e-14	26.4299	UP
CD47	0.2361	8.18091	8.48134	2.66988e-16	1.97069e-14	26.3289	UP
C3orf38	0.118685	7.54639	8.47826	2.73222e-16	2.00563e-14	26.3063	NOT
SASH3	-0.155355	10.0253	-8.47242	2.85434e-16	2.07707e-14	26.2634	NOT
ZNF684	0.0708963	7.03301	8.47212	2.86063e-16	2.07707e-14	26.2613	NOT
SH3BGRL3	-0.245395	12.23	-8.47052	2.89522e-16	2.09082e-14	26.2495	DOWN
PPP1R12A	0.22343	7.48203	8.46452	3.02812e-16	2.17504e-14	26.2056	UP
CAPZA2	0.404728	9.51421	8.46209	3.08372e-16	2.20313e-14	26.1878	UP
CORO7	-0.208996	9.0935	-8.45802	3.17899e-16	2.25911e-14	26.158	DOWN
EPS15	0.155002	7.67555	8.45473	3.25803e-16	2.30303e-14	26.1339	NOT
RCOR3	0.286345	8.31567	8.45206	3.32378e-16	2.33714e-14	26.1143	UP
METTL4	0.106682	7.33919	8.45032	3.36721e-16	2.35528e-14	26.1016	NOT
MORC3	0.142373	7.32717	8.44751	3.43883e-16	2.39285e-14	26.081	NOT
MYO9B	-0.218053	9.01255	-8.44357	3.54157e-16	2.45157e-14	26.0522	DOWN
SRPR	-0.153677	8.69594	-8.43731	3.711e-16	2.55562e-14	26.0064	NOT
ZBED5	0.274637	8.51613	8.4323	3.85214e-16	2.63921e-14	25.9699	UP
MAPK6	0.159186	7.37884	8.42831	3.96852e-16	2.70508e-14	25.9407	NOT
C14orf142	0.175981	7.3009	8.42591	4.04032e-16	2.74004e-14	25.9232	NOT
TMED7	0.203822	8.05057	8.4206	4.20325e-16	2.83613e-14	25.8845	UP
USP15	0.252307	8.16472	8.41931	4.24406e-16	2.84928e-14	25.875	UP
PIGK	0.157579	7.42666	8.41581	4.35602e-16	2.90982e-14	25.8495	NOT
ZDHHC17	0.246442	7.89654	8.40855	4.59813e-16	3.04525e-14	25.7965	UP
RPL34	0.176505	7.25574	8.40837	4.60435e-16	3.04525e-14	25.7952	NOT
NEK1	0.0636236	7.02209	8.40524	4.71285e-16	3.10166e-14	25.7724	NOT
CHD8	-0.262052	9.74104	-8.40201	4.82737e-16	3.16145e-14	25.7489	DOWN
COPS4	0.180357	7.93064	8.40088	4.86842e-16	3.17279e-14	25.7406	UP
RHBDD2	-0.199704	9.82507	-8.39988	4.9048e-16	3.18097e-14	25.7333	DOWN
SC5DL	0.145752	7.54943	8.39834	4.96111e-16	3.20195e-14	25.7222	NOT
RPL9	0.453899	9.26612	8.38929	5.3065e-16	3.4084e-14	25.6563	UP
C16orf63	0.210861	8.02465	8.38841	5.34141e-16	3.41441e-14	25.6498	UP
C3orf58	0.145404	7.31581	8.386	5.43794e-16	3.45957e-14	25.6323	NOT
STAG2	0.182461	7.80229	8.38327	5.54933e-16	3.5137e-14	25.6124	UP
TMED5	0.351852	8.72577	8.37111	6.07343e-16	3.81778e-14	25.5241	UP
NUP54	0.179769	7.41547	8.37082	6.08674e-16	3.81778e-14	25.522	UP
RBX1	0.36137	8.75636	8.36491	6.35955e-16	3.97026e-14	25.479	UP
GPAM	0.0616353	7.04596	8.36172	6.51182e-16	4.04641e-14	25.4559	NOT
STARD3NL	0.161527	7.5521	8.35874	6.65736e-16	4.1177e-14	25.4342	NOT
FAM96A	0.307503	9.02809	8.35509	6.83959e-16	4.21092e-14	25.4078	UP
RPL23	0.59079	8.32238	8.35354	6.91896e-16	4.24024e-14	25.3965	UP
RNF31	-0.193343	8.83938	-8.35143	7.02782e-16	4.28729e-14	25.3812	DOWN
ASF1A	0.179933	7.78787	8.35049	7.07673e-16	4.2975e-14	25.3744	UP
C13orf27	0.212888	7.50974	8.34206	7.53302e-16	4.5539e-14	25.3132	UP
UNC13D	-0.153157	7.91428	-8.34118	7.58202e-16	4.56287e-14	25.3069	NOT
LYRM5	0.197502	8.10079	8.34055	7.61771e-16	4.56379e-14	25.3023	UP
SLC35A1	0.288211	8.50909	8.33574	7.8936e-16	4.69227e-14	25.2675	UP
TIGD7	0.113672	7.15635	8.33559	7.9024e-16	4.69227e-14	25.2664	NOT
SETDB1	-0.139137	8.52887	-8.32543	8.51885e-16	5.03592e-14	25.1929	NOT
PTBP2	0.128723	7.20971	8.31989	8.87513e-16	5.22342e-14	25.1527	NOT
ANGEL2	0.243327	8.76792	8.31759	9.0271e-16	5.28956e-14	25.1361	UP
GOPC	0.129111	7.29249	8.31649	9.10071e-16	5.30941e-14	25.1282	NOT
C12orf29	0.174162	7.38933	8.31485	9.21127e-16	5.35054e-14	25.1164	NOT
BNIP2	0.287359	8.75755	8.31109	9.47114e-16	5.47768e-14	25.0891	UP
MTMR9	0.15377	7.8913	8.31042	9.51759e-16	5.48082e-14	25.0843	NOT
PRPF18	0.0908949	7.12602	8.30585	9.84464e-16	5.64482e-14	25.0513	NOT
DULLARD	-0.172183	8.3664	-8.29835	1.04047e-15	5.94044e-14	24.9971	NOT
CEBPZ	0.261329	8.18997	8.2932	1.08068e-15	6.14377e-14	24.96	UP
CYP2A7	0.0631789	6.99502	8.28911	1.11376e-15	6.30504e-14	24.9305	NOT
TMEM126B	0.289696	7.98312	8.28676	1.1332e-15	6.38799e-14	24.9135	UP
RIOK2	0.162384	7.55561	8.28283	1.16649e-15	6.52348e-14	24.8852	NOT
ACTN4	-0.241978	8.86144	-8.28277	1.167e-15	6.52348e-14	24.8848	DOWN
HINT1	0.538805	9.50094	8.28183	1.17516e-15	6.54171e-14	24.878	UP
PPP1CC	0.279295	9.92832	8.28051	1.1866e-15	6.57799e-14	24.8685	UP
RGS18	0.439041	9.52026	8.27797	1.20898e-15	6.67434e-14	24.8502	UP
TRIM26	-0.188817	8.86911	-8.27193	1.26393e-15	6.94903e-14	24.8067	DOWN
TTC33	0.0822198	7.03206	8.26542	1.32599e-15	7.26036e-14	24.7598	NOT
UBE2V2	0.155095	7.67375	8.26454	1.3346e-15	7.27764e-14	24.7534	NOT
CSRP2BP	0.121342	7.38407	8.26198	1.35994e-15	7.38567e-14	24.735	NOT
IDI1	0.156621	7.35782	8.24905	1.49547e-15	8.08886e-14	24.642	NOT
CUL5	0.250393	7.71042	8.24221	1.5724e-15	8.47067e-14	24.593	UP
TRAM1	0.333483	10.6317	8.23817	1.61972e-15	8.69053e-14	24.5639	UP
STK17B	0.137037	7.61958	8.22447	1.79082e-15	9.57014e-14	24.4657	NOT
CCDC117	0.100152	7.53808	8.22102	1.83677e-15	9.75744e-14	24.4409	NOT
UBE2N	0.238296	8.4016	8.22074	1.84048e-15	9.75744e-14	24.4389	UP
C14orf104	0.074848	7.05269	8.21135	1.9715e-15	1.03891e-13	24.3716	NOT
SHKBP1	-0.300824	9.05481	-8.21109	1.97518e-15	1.03891e-13	24.3698	DOWN
TC2N	0.177582	7.29827	8.20978	1.9943e-15	1.04182e-13	24.3603	NOT
SIP1	0.10252	7.24387	8.20957	1.9973e-15	1.04182e-13	24.3589	NOT
DCP1A	-0.144679	8.24953	-8.20911	2.0041e-15	1.04182e-13	24.3556	NOT
NMD3	0.120371	7.17165	8.20384	2.08282e-15	1.07855e-13	24.3179	NOT
CCNG1	0.18562	8.66773	8.20128	2.12219e-15	1.09236e-13	24.2995	UP
TAX1BP1	0.339454	9.33739	8.20054	2.13364e-15	1.09236e-13	24.2943	UP
TBK1	0.219775	8.32265	8.20052	2.13402e-15	1.09236e-13	24.2941	UP
IKZF5	0.121522	7.347	8.19547	2.2142e-15	1.12907e-13	24.258	NOT
DNAJB14	0.144088	7.66237	8.19017	2.30172e-15	1.16924e-13	24.2201	NOT
PRKRIR	0.315746	8.77473	8.18955	2.3122e-15	1.17011e-13	24.2156	UP
GTF2E1	0.143936	7.45777	8.18001	2.47898e-15	1.24978e-13	24.1475	NOT
ABCB10	0.182459	7.52982	8.17786	2.51805e-15	1.26471e-13	24.1322	UP
VPS29	0.285799	9.19118	8.17407	2.58868e-15	1.29531e-13	24.1051	UP
RPS15A	0.547586	10.6738	8.1717	2.63372e-15	1.31293e-13	24.0882	UP
CRLS1	0.23026	8.25347	8.17009	2.66486e-15	1.32351e-13	24.0767	UP
CAPZB	-0.187507	10.562	-8.16593	2.7469e-15	1.35921e-13	24.0471	DOWN
EEF1E1	0.186218	7.37823	8.15932	2.88259e-15	1.42109e-13	23.9999	UP
DNM1L	0.0924948	7.33799	8.1573	2.92523e-15	1.4368e-13	23.9855	NOT
ARGLU1	0.451267	9.88043	8.15323	3.0133e-15	1.47464e-13	23.9565	UP
RSBN1	0.245389	8.43747	8.15253	3.02865e-15	1.47674e-13	23.9515	UP
SND1	-0.198258	8.98576	-8.14695	3.15424e-15	1.53239e-13	23.9118	DOWN
WDFY1	0.290266	8.76502	8.14335	3.23789e-15	1.56732e-13	23.8862	UP
TBC1D15	0.195709	7.98164	8.14246	3.25882e-15	1.57176e-13	23.8799	UP
PRKAB2	0.102348	7.35703	8.14148	3.28227e-15	1.57738e-13	23.8728	NOT
RAB11A	0.240209	9.1018	8.14001	3.31756e-15	1.58862e-13	23.8624	UP
ACTR1A	-0.168787	9.05966	-8.13927	3.33546e-15	1.59149e-13	23.8571	NOT
USO1	0.213464	8.20949	8.13557	3.42632e-15	1.62903e-13	23.8308	UP
PIP5K1C	-0.175876	8.31381	-8.13161	3.52623e-15	1.67058e-13	23.8027	NOT
MAN2B1	-0.193612	8.61094	-8.13111	3.53928e-15	1.67084e-13	23.7991	DOWN
CAPNS1	-0.224541	10.4751	-8.12911	3.59092e-15	1.68925e-13	23.7849	DOWN
KBTBD8	0.137756	7.29084	8.12565	3.68228e-15	1.72615e-13	23.7603	NOT
VCPIP1	0.228689	7.93674	8.11431	3.99825e-15	1.86771e-13	23.6798	UP
RPL24	0.359807	11.5949	8.11032	4.11567e-15	1.91587e-13	23.6515	UP
GNA13	0.260104	9.37062	8.10939	4.14344e-15	1.9221e-13	23.6449	UP
TERF2	-0.130221	8.25719	-8.10705	4.21444e-15	1.94827e-13	23.6283	NOT
NDUFB3	0.376743	8.71829	8.10531	4.26783e-15	1.96441e-13	23.616	UP
MTMR6	0.238949	7.70548	8.10496	4.27877e-15	1.96441e-13	23.6135	UP
CLDND1	0.2532	8.63422	8.09225	4.6916e-15	2.14657e-13	23.5234	UP
GGPS1	0.153092	8.38351	8.08674	4.8824e-15	2.2196e-13	23.4844	NOT
SLC35A4	-0.161284	8.51894	-8.08668	4.88444e-15	2.2196e-13	23.484	NOT
C6orf120	0.10434	7.08624	8.08579	4.91598e-15	2.22636e-13	23.4777	NOT
NSMCE2	0.0981919	7.15843	8.0832	5.00888e-15	2.26076e-13	23.4594	NOT
SMARCA5	0.14924	7.34274	8.0805	5.10795e-15	2.29772e-13	23.4402	NOT
CCNC	0.157057	7.24728	8.07924	5.15446e-15	2.31086e-13	23.4313	NOT
SELT	0.191113	7.80748	8.07475	5.32484e-15	2.37926e-13	23.3995	UP
EIF4G2	0.216991	11.0099	8.07148	5.4521e-15	2.428e-13	23.3764	UP
PDHX	0.106914	7.34877	8.07092	5.4743e-15	2.42979e-13	23.3724	NOT
TAPBP	-0.17226	9.31508	-8.06524	5.70345e-15	2.52311e-13	23.3323	NOT
VPS26A	0.211753	9.06124	8.06247	5.81875e-15	2.56563e-13	23.3128	UP
ENY2	0.285664	8.17702	8.05623	6.08668e-15	2.67493e-13	23.2687	UP
NUDT21	0.111793	7.19449	8.04584	6.56061e-15	2.87376e-13	23.1954	NOT
PRPF38B	0.119204	7.37923	8.04281	6.70546e-15	2.92761e-13	23.174	NOT
CYP2R1	0.127091	7.41561	8.03809	6.9373e-15	3.01897e-13	23.1408	NOT
RPS21	0.227746	7.86345	8.033	7.19644e-15	3.12157e-13	23.1049	UP
LOC442454	0.419807	7.8456	8.02093	7.84951e-15	3.39383e-13	23.02	UP
MRPS28	0.121768	7.22181	8.01944	7.93393e-15	3.41927e-13	23.0095	NOT
CCDC126	0.107377	7.147	8.01616	8.12362e-15	3.48976e-13	22.9864	NOT
SMARCAD1	0.105687	7.23321	8.01457	8.21657e-15	3.51838e-13	22.9753	NOT
EIF4A2	0.319246	10.9053	8.01265	8.33077e-15	3.54963e-13	22.9618	UP
BTBD10	0.14176	7.89361	8.01246	8.3427e-15	3.54963e-13	22.9604	NOT
ZNF77	0.0566635	7.07734	8.01118	8.41937e-15	3.57088e-13	22.9514	NOT
ZNF680	0.0735397	7.02625	8.00234	8.97175e-15	3.79312e-13	22.8893	NOT
UQCRC1	-0.184169	9.53114	-8.00189	9.00036e-15	3.79321e-13	22.8862	DOWN
C14orf106	0.26586	8.59392	7.99926	9.17229e-15	3.85352e-13	22.8677	UP
COX7B	0.264034	7.45161	7.99874	9.20619e-15	3.85563e-13	22.8641	UP
SERINC1	0.238041	8.36359	7.99707	9.31736e-15	3.87794e-13	22.8523	UP
PIGY	0.28808	9.29346	7.99707	9.3175e-15	3.87794e-13	22.8523	UP
ZMPSTE24	0.244613	9.11433	7.9929	9.60073e-15	3.98341e-13	22.823	UP
SLC25A46	0.164374	7.63621	7.98973	9.82114e-15	4.06224e-13	22.8008	NOT
COX7C	0.535781	9.60684	7.987	1.00155e-14	4.12327e-13	22.7817	UP
PDCD10	0.0823964	7.04872	7.98679	1.00304e-14	4.12327e-13	22.7802	NOT
PSMC6	0.192292	7.47072	7.98562	1.01147e-14	4.14518e-13	22.772	UP
CEP290	0.0454405	6.99545	7.98458	1.01909e-14	4.15462e-13	22.7647	NOT
CD69	0.090515	7.07543	7.98445	1.02e-14	4.15462e-13	22.7638	NOT
ZNF25	0.165154	7.7266	7.98355	1.02666e-14	4.16905e-13	22.7575	NOT
CREBZF	0.143993	7.33318	7.97444	1.0959e-14	4.43675e-13	22.6936	NOT
NAB1	0.177931	7.58404	7.97092	1.12382e-14	4.53603e-13	22.669	UP
MDFIC	0.109851	7.34104	7.97024	1.12938e-14	4.54472e-13	22.6642	NOT
BTF3L4	0.176158	8.11864	7.96711	1.15492e-14	4.63354e-13	22.6424	NOT
CCDC132	0.10521	7.09211	7.96406	1.1804e-14	4.71087e-13	22.621	NOT
FKBP3	0.160949	7.22792	7.96396	1.18124e-14	4.71087e-13	22.6203	NOT
SAMSN1	0.134827	7.40405	7.95584	1.25195e-14	4.96594e-13	22.5635	NOT
MYO1F	-0.288748	9.41673	-7.95576	1.25264e-14	4.96594e-13	22.5629	DOWN
GPR65	0.206982	7.71973	7.95476	1.26157e-14	4.98655e-13	22.556	UP
PIGA	0.175716	7.70215	7.9541	1.26758e-14	4.99553e-13	22.5513	NOT
RAB6A	0.132772	7.45002	7.9524	1.2831e-14	5.04181e-13	22.5394	NOT
LMNA	-0.277444	8.08182	-7.95026	1.30283e-14	5.10436e-13	22.5245	DOWN
CRIPAK	-0.240198	8.29193	-7.94589	1.34415e-14	5.25082e-13	22.494	DOWN
ST8SIA4	0.134491	7.44597	7.94272	1.37498e-14	5.35562e-13	22.4718	NOT
TBC1D25	-0.116964	7.57101	-7.94224	1.3797e-14	5.35836e-13	22.4685	NOT
TOMM7	0.491776	10.5351	7.94181	1.38395e-14	5.3593e-13	22.4655	UP
ZNF480	0.118033	7.34849	7.93842	1.41777e-14	5.47438e-13	22.4419	NOT
DNAJC19	0.0731465	7.0915	7.93704	1.43181e-14	5.51269e-13	22.4322	NOT
OGFR	-0.177558	9.09708	-7.93218	1.48233e-14	5.69078e-13	22.3983	NOT
AGPAT5	0.0987771	7.17261	7.93057	1.49946e-14	5.74006e-13	22.3871	NOT
RASA1	0.225588	8.12595	7.92859	1.52079e-14	5.78445e-13	22.3733	UP
KIAA0922	-0.156386	8.82155	-7.92851	1.5217e-14	5.78445e-13	22.3727	NOT
CNIH4	0.292359	8.2561	7.92829	1.52405e-14	5.78445e-13	22.3712	UP
MEX3C	0.158681	7.45004	7.92732	1.53462e-14	5.80807e-13	22.3644	NOT
MRPL15	0.161894	7.47214	7.92572	1.55226e-14	5.85825e-13	22.3533	NOT
GBAS	0.138957	7.6608	7.92421	1.56905e-14	5.88305e-13	22.3427	NOT
ATP11B	0.194814	7.47522	7.92415	1.56973e-14	5.88305e-13	22.3423	UP
NCK1	0.192628	8.39	7.92394	1.57204e-14	5.88305e-13	22.3409	UP
STRN3	0.138023	7.64021	7.92224	1.59128e-14	5.93841e-13	22.329	NOT
TFB2M	0.148624	7.63695	7.91831	1.63647e-14	6.09004e-13	22.3016	NOT
PACS1	-0.256253	8.69504	-7.91716	1.6499e-14	6.12295e-13	22.2936	DOWN
SEC23IP	0.113262	7.54808	7.91389	1.68886e-14	6.23535e-13	22.2708	NOT
ERGIC2	0.119531	7.19852	7.91383	1.68952e-14	6.23535e-13	22.2704	NOT
SPRED1	0.144306	7.2285	7.91254	1.70514e-14	6.27568e-13	22.2614	NOT
MKI67IP	0.199263	7.96198	7.91195	1.71235e-14	6.28489e-13	22.2573	UP
SUZ12	0.320404	9.70859	7.90761	1.76606e-14	6.46425e-13	22.2271	UP
ZNF260	0.120043	7.34291	7.89992	1.86537e-14	6.8091e-13	22.1736	NOT
WDR12	0.094499	7.4183	7.89827	1.88739e-14	6.87072e-13	22.1621	NOT
DRG2	-0.106404	7.81958	-7.89704	1.90395e-14	6.91217e-13	22.1536	NOT
C2orf47	0.124483	7.82866	7.89147	1.9809e-14	7.17204e-13	22.1149	NOT
UBR4	-0.188619	9.32068	-7.88978	2.00476e-14	7.23881e-13	22.1032	DOWN
DENR	0.201237	8.41238	7.88398	2.08914e-14	7.52314e-13	22.0629	UP
ACTL6A	0.14413	8.12774	7.88347	2.09677e-14	7.52964e-13	22.0593	NOT
ARL6IP5	0.307589	10.612	7.8831	2.10221e-14	7.52964e-13	22.0568	UP
RCN2	0.123344	7.27799	7.8763	2.20621e-14	7.87324e-13	22.0096	NOT
UBL3	0.249963	8.59134	7.87606	2.20993e-14	7.87324e-13	22.0079	UP
PTS	0.142635	7.31503	7.87511	2.22494e-14	7.90563e-13	22.0013	NOT
KHSRP	-0.165265	8.30699	-7.87137	2.28468e-14	8.09638e-13	21.9754	NOT
OSBPL11	0.162866	7.44434	7.8672	2.35325e-14	8.31731e-13	21.9465	NOT
TRIM28	-0.16691	8.46314	-7.86611	2.37153e-14	8.35979e-13	21.9389	NOT
C16orf61	0.244765	8.4507	7.86	2.47652e-14	8.70691e-13	21.8966	UP
ZNF484	0.069304	7.13671	7.85753	2.5203e-14	8.83757e-13	21.8795	NOT
DOCK11	0.274237	9.33687	7.85449	2.57515e-14	9.00628e-13	21.8584	UP
RAB8B	0.335128	9.34078	7.85306	2.60133e-14	9.07408e-13	21.8485	UP
MYST1	-0.179204	8.80992	-7.85107	2.63831e-14	9.1791e-13	21.8347	DOWN
SENP6	0.159231	7.77436	7.85022	2.65419e-14	9.21038e-13	21.8289	NOT
SPCS3	0.14961	7.50269	7.84591	2.73643e-14	9.47117e-13	21.7991	NOT
OPA1	0.0748196	7.12678	7.84508	2.75249e-14	9.50213e-13	21.7933	NOT
HSPA14	0.143678	7.52218	7.84338	2.78583e-14	9.59243e-13	21.7816	NOT
IFT74	0.0761076	7.04609	7.84203	2.8125e-14	9.65939e-13	21.7723	NOT
DIAPH1	-0.214064	8.50868	-7.84064	2.84038e-14	9.73013e-13	21.7626	DOWN
MRFAP1L1	0.197844	8.05913	7.83996	2.85405e-14	9.75195e-13	21.7579	UP
YPEL5	0.277049	9.72239	7.83541	2.94726e-14	1.00348e-12	21.7265	UP
GABPA	0.0831666	7.14744	7.83519	2.95186e-14	1.00348e-12	21.725	NOT
FIG4	-0.140076	8.43012	-7.83233	3.01215e-14	1.02138e-12	21.7052	NOT
LACTB2	0.103171	7.23336	7.8292	3.07951e-14	1.04158e-12	21.6836	NOT
ZNF282	-0.107396	7.64822	-7.82804	3.10483e-14	1.04609e-12	21.6756	NOT
RPS6KB1	0.230517	7.95309	7.82787	3.10851e-14	1.04609e-12	21.6745	UP
LSM1	0.259524	9.04538	7.8254	3.16331e-14	1.06185e-12	21.6574	UP
PCF11	0.196588	8.03495	7.82453	3.18291e-14	1.06576e-12	21.6513	UP
GNAI2	-0.190868	11.8583	-7.82289	3.22001e-14	1.07548e-12	21.64	DOWN
TWISTNB	0.0716341	7.08823	7.82203	3.23957e-14	1.07932e-12	21.6341	NOT
C4orf27	0.10665	7.24594	7.8209	3.26542e-14	1.08388e-12	21.6263	NOT
CLASP2	0.101427	7.27441	7.82072	3.2695e-14	1.08388e-12	21.6251	NOT
RAB18	0.0935492	7.12748	7.81961	3.29538e-14	1.08976e-12	21.6174	NOT
NGLY1	0.143325	8.07608	7.81895	3.31073e-14	1.09213e-12	21.6129	NOT
UCHL5	0.131962	7.56138	7.81812	3.33009e-14	1.09581e-12	21.6072	NOT
PLEKHA3	0.0931876	7.22051	7.81417	3.4243e-14	1.12314e-12	21.5799	NOT
SCYL2	0.16575	8.00687	7.81375	3.43437e-14	1.12314e-12	21.577	NOT
TUBGCP2	-0.141924	8.54394	-7.81359	3.43836e-14	1.12314e-12	21.5759	NOT
TCTEX1D2	0.125133	7.27344	7.80559	3.63788e-14	1.18542e-12	21.5208	NOT
C14orf166	0.237714	8.31405	7.79994	3.78576e-14	1.2306e-12	21.4818	UP
PSMA4	0.257196	8.03075	7.79843	3.82606e-14	1.24068e-12	21.4715	UP
SH2D1A	0.260445	8.35462	7.797	3.86499e-14	1.25027e-12	21.4616	UP
ATP6V0D1	-0.258854	10.564	-7.79382	3.95238e-14	1.275e-12	21.4397	DOWN
TMEM123	0.395655	10.0254	7.79353	3.96053e-14	1.275e-12	21.4377	UP
PPIL5	0.114257	7.56302	7.78512	4.2021e-14	1.34897e-12	21.3799	NOT
GTF2F2	0.171652	7.98912	7.78483	4.21047e-14	1.34897e-12	21.3779	NOT
RAB10	0.284231	10.1212	7.78381	4.24086e-14	1.3548e-12	21.3709	UP
ATG4C	0.0752613	7.29088	7.78354	4.24895e-14	1.3548e-12	21.369	NOT
SMAD4	0.215903	8.61224	7.78286	4.26937e-14	1.35807e-12	21.3644	UP
MAP3K7	0.145293	7.99445	7.78162	4.30679e-14	1.36671e-12	21.3558	NOT
TPP2	0.0676159	7.12139	7.77708	4.44633e-14	1.40251e-12	21.3247	NOT
ADAM10	0.106796	7.30971	7.77704	4.44758e-14	1.40251e-12	21.3244	NOT
RQCD1	0.0908152	7.34031	7.77678	4.45589e-14	1.40251e-12	21.3226	NOT
IER3IP1	0.133199	7.17686	7.7766	4.46158e-14	1.40251e-12	21.3213	NOT
ZBTB33	0.274204	8.81252	7.77612	4.47662e-14	1.40362e-12	21.318	UP
RAB33B	0.199517	7.32185	7.77582	4.48612e-14	1.40362e-12	21.316	UP
MLL4	-0.193662	8.76855	-7.77396	4.54507e-14	1.41874e-12	21.3032	DOWN
USP7	-0.181275	8.32374	-7.77218	4.60218e-14	1.43257e-12	21.291	DOWN
CP110	0.168898	7.573	7.77191	4.61083e-14	1.43257e-12	21.2892	NOT
ACTR10	0.164228	8.49966	7.7706	4.65372e-14	1.44254e-12	21.2801	NOT
PIK3CD	-0.220267	10.0971	-7.76882	4.71206e-14	1.45725e-12	21.268	DOWN
UQCRQ	0.389121	9.18585	7.76771	4.74894e-14	1.46526e-12	21.2603	UP
DDX50	0.144824	7.63556	7.75832	5.07262e-14	1.56153e-12	21.1959	NOT
ROCK1	0.093625	7.11792	7.75614	5.15095e-14	1.58199e-12	21.1809	NOT
GLCE	0.111097	7.3438	7.75367	5.24077e-14	1.6011e-12	21.164	NOT
TMEM181	0.277206	8.70474	7.75362	5.24258e-14	1.6011e-12	21.1637	UP
MST4	0.233906	8.71081	7.75345	5.24911e-14	1.6011e-12	21.1625	UP
CBR4	0.147186	7.62084	7.75225	5.29319e-14	1.61087e-12	21.1543	NOT
CEP135	0.140784	7.63991	7.75031	5.36596e-14	1.6293e-12	21.141	NOT
POU2F1	-0.124973	7.59909	-7.74442	5.59203e-14	1.69409e-12	21.1007	NOT
UBE2E1	0.267816	9.35715	7.74051	5.74741e-14	1.73723e-12	21.0739	UP
CGRRF1	0.140022	7.46928	7.73944	5.79067e-14	1.74635e-12	21.0666	NOT
ANXA1	0.426934	10.5961	7.73804	5.84742e-14	1.75949e-12	21.057	UP
CD46	0.258527	8.67351	7.73335	6.04297e-14	1.81223e-12	21.0249	UP
PARVG	-0.153611	10.3421	-7.73319	6.0498e-14	1.81223e-12	21.0238	NOT
DNAJB9	0.148104	7.56049	7.73131	6.12986e-14	1.8321e-12	21.0109	NOT
C8orf59	0.264607	7.85284	7.72675	6.32835e-14	1.88721e-12	20.9798	UP
PAQR3	0.0810794	7.10387	7.72642	6.34327e-14	1.88744e-12	20.9775	NOT
ZNF627	0.0801201	7.23542	7.7255	6.38428e-14	1.89542e-12	20.9712	NOT
CLN5	0.135452	7.56091	7.72225	6.53099e-14	1.93468e-12	20.949	NOT
KIAA1468	0.175978	7.63117	7.72068	6.60311e-14	1.95172e-12	20.9383	NOT
ZNF444	-0.103308	7.64338	-7.72023	6.6238e-14	1.95351e-12	20.9352	NOT
FLII	-0.18231	8.64529	-7.71861	6.69931e-14	1.97143e-12	20.9242	DOWN
G6PD	-0.270005	9.17378	-7.71481	6.87943e-14	2.01998e-12	20.8982	DOWN
NFYC	-0.152879	9.05468	-7.71426	6.90586e-14	2.02329e-12	20.8945	NOT
C9orf82	0.0662488	7.03583	7.7135	6.94263e-14	2.02962e-12	20.8893	NOT
C11orf46	0.199108	7.8574	7.71106	7.06206e-14	2.06002e-12	20.8726	UP
C5orf35	0.0734484	7.08587	7.70853	7.18812e-14	2.09223e-12	20.8554	NOT
STT3B	0.145516	7.49987	7.70604	7.31383e-14	2.12419e-12	20.8384	NOT
PFDN5	0.428889	10.0562	7.70481	7.37715e-14	2.13793e-12	20.83	UP
GBA	-0.19216	8.46173	-7.70306	7.46793e-14	2.15956e-12	20.8181	DOWN
PQLC3	0.234621	9.10071	7.70045	7.60484e-14	2.1944e-12	20.8003	UP
FNDC3A	0.155062	7.27395	7.69968	7.64587e-14	2.20148e-12	20.7951	NOT
VPS37B	-0.203131	9.21149	-7.69851	7.70884e-14	2.21096e-12	20.787	DOWN
UBE2Q2	0.238574	8.16139	7.69845	7.71189e-14	2.21096e-12	20.7867	UP
CHD1	0.257827	8.12548	7.69661	7.81181e-14	2.23038e-12	20.7741	UP
CUTC	0.154712	7.98496	7.69653	7.81577e-14	2.23038e-12	20.7736	NOT
MICAL1	-0.189848	9.21769	-7.69628	7.8297e-14	2.23038e-12	20.7718	DOWN
PSMD14	0.127376	7.63274	7.69309	8.00581e-14	2.27569e-12	20.7501	NOT
RB1	0.0890355	7.2276	7.69029	8.16372e-14	2.31565e-12	20.731	NOT
GMPPB	-0.166195	7.61416	-7.68752	8.32244e-14	2.35568e-12	20.7122	NOT
RIN3	-0.165305	8.03834	-7.68087	8.71757e-14	2.4623e-12	20.6669	NOT
VPS52	-0.117714	8.18677	-7.6697	9.42189e-14	2.65243e-12	20.591	NOT
SLC30A9	0.185672	7.92697	7.66957	9.4304e-14	2.65243e-12	20.5902	UP
ZNF22	0.226404	8.17301	7.66311	9.86414e-14	2.76859e-12	20.5462	UP
PDE3B	0.147332	7.58647	7.66172	9.95988e-14	2.7896e-12	20.5368	NOT
STXBP3	0.207148	8.02911	7.6601	1.00726e-13	2.81528e-12	20.5258	UP
SP2	-0.176804	8.52047	-7.65696	1.0295e-13	2.87143e-12	20.5045	NOT
RTCD1	0.108683	7.59016	7.65622	1.03475e-13	2.88007e-12	20.4995	NOT
TOMM20	0.186577	8.23116	7.65533	1.04121e-13	2.89201e-12	20.4934	UP
MORF4L2	0.154286	8.13379	7.65193	1.06606e-13	2.9549e-12	20.4704	NOT
BUB3	0.209902	8.78939	7.65101	1.0729e-13	2.96769e-12	20.4641	UP
DHX15	0.203375	8.66539	7.64488	1.1196e-13	3.09045e-12	20.4225	UP
MOBKL2A	-0.274175	9.72816	-7.64276	1.13619e-13	3.1298e-12	20.4082	DOWN
DPY19L1	0.108588	7.63802	7.64093	1.15068e-13	3.16318e-12	20.3958	NOT
PPP2R1A	-0.168824	10.0897	-7.62924	1.24778e-13	3.42307e-12	20.3167	NOT
ZNF277	0.1737	7.97193	7.62475	1.28723e-13	3.52406e-12	20.2863	NOT
PTGER4	0.246644	8.62454	7.6242	1.29216e-13	3.53032e-12	20.2825	UP
C9orf123	0.160105	7.55642	7.62285	1.30428e-13	3.55616e-12	20.2734	NOT
SLC38A2	0.318254	8.13933	7.62211	1.31095e-13	3.56708e-12	20.2684	UP
C2orf64	0.17961	8.23656	7.61799	1.34888e-13	3.66282e-12	20.2406	UP
SERTAD1	-0.175594	8.98266	-7.61568	1.37062e-13	3.71347e-12	20.225	NOT
UTP14C	0.124957	7.67149	7.61542	1.3731e-13	3.71347e-12	20.2232	NOT
PAPD4	0.212323	9.02448	7.60902	1.43532e-13	3.87391e-12	20.1799	UP
SERP1	0.183611	8.0427	7.60814	1.44407e-13	3.88968e-12	20.174	UP
TSC2	-0.122718	7.6918	-7.60775	1.44799e-13	3.89239e-12	20.1713	NOT
TAF5	0.0996923	7.32922	7.59606	1.56974e-13	4.21119e-12	20.0925	NOT
DCLRE1A	0.0625761	7.0644	7.59157	1.6192e-13	4.33517e-12	20.0622	NOT
HNRNPC	0.216123	8.12191	7.59036	1.63277e-13	4.36277e-12	20.0541	UP
LYRM2	0.170433	7.79303	7.58651	1.67678e-13	4.4714e-12	20.0281	NOT
HECA	0.228899	7.7247	7.58393	1.70683e-13	4.54248e-12	20.0108	UP
MTHFD2	0.122637	7.33009	7.57481	1.81759e-13	4.82764e-12	19.9494	NOT
SLC30A5	0.0789553	7.27601	7.57388	1.8293e-13	4.84261e-12	19.9431	NOT
EIF3E	0.355794	11.1592	7.57379	1.83048e-13	4.84261e-12	19.9425	UP
UPF3B	0.113949	7.40029	7.56506	1.94393e-13	5.1326e-12	19.8838	NOT
CCDC14	0.20661	8.00947	7.56332	1.96739e-13	5.18429e-12	19.872	UP
CCDC72	0.399492	8.78453	7.56138	1.99378e-13	5.24347e-12	19.859	UP
DNAJA2	0.197934	9.01808	7.55939	2.02123e-13	5.30523e-12	19.8457	UP
HIGD1A	0.210699	8.29673	7.55447	2.09088e-13	5.47171e-12	19.8126	UP
SS18L2	0.268769	9.81029	7.55433	2.09285e-13	5.47171e-12	19.8117	UP
IFT57	0.0867652	7.16564	7.5524	2.12087e-13	5.53414e-12	19.7987	NOT
FAM8A1	0.216443	7.97264	7.55209	2.12541e-13	5.53518e-12	19.7966	UP
MRPS35	0.144475	7.59169	7.5484	2.18001e-13	5.66634e-12	19.7719	NOT
CBFB	0.117079	7.64956	7.54798	2.18632e-13	5.67169e-12	19.769	NOT
ZNF559	0.120526	7.60491	7.54476	2.23525e-13	5.78739e-12	19.7474	NOT
MRPS22	0.186405	8.34966	7.54067	2.29885e-13	5.94056e-12	19.72	UP
PAPOLA	0.258474	9.18175	7.53503	2.3897e-13	6.1634e-12	19.6822	UP
HMGB2	0.169567	8.42775	7.53269	2.42825e-13	6.25077e-12	19.6666	NOT
S100A8	0.421507	12.48	7.52961	2.48025e-13	6.37233e-12	19.6459	UP
MOSPD3	-0.176104	7.97189	-7.52525	2.55555e-13	6.5532e-12	19.6167	NOT
DTWD1	0.0579723	7.06737	7.52453	2.56812e-13	6.57282e-12	19.6119	NOT
CDK2AP2	-0.140457	8.30697	-7.51855	2.67559e-13	6.83477e-12	19.5719	NOT
DPP9	-0.151455	8.42413	-7.51817	2.68262e-13	6.83697e-12	19.5693	NOT
CD48	0.372653	9.89734	7.51795	2.68669e-13	6.83697e-12	19.5678	UP
UNC50	0.155533	9.44223	7.51613	2.72033e-13	6.90944e-12	19.5557	NOT
NPLOC4	-0.137298	8.27977	-7.51526	2.73657e-13	6.93749e-12	19.5499	NOT
ZNF280D	0.0553903	7.05324	7.51327	2.7742e-13	7.01957e-12	19.5366	NOT
LONRF1	0.103084	7.27352	7.51029	2.83141e-13	7.15078e-12	19.5166	NOT
BAP1	-0.113504	7.91939	-7.50985	2.83996e-13	7.15884e-12	19.5137	NOT
RHOG	-0.219638	12.6068	-7.50839	2.86848e-13	7.21711e-12	19.5039	DOWN
HPGD	0.0767178	7.12922	7.50216	2.99332e-13	7.51705e-12	19.4624	NOT
ZNF654	0.088995	7.20448	7.50131	3.01076e-13	7.54666e-12	19.4567	NOT
COG1	-0.0930707	7.55782	-7.49899	3.059e-13	7.65324e-12	19.4412	NOT
TBC1D20	-0.102903	7.94453	-7.49761	3.08801e-13	7.71137e-12	19.432	NOT
GTF2F1	-0.122155	8.50658	-7.49671	3.10702e-13	7.74437e-12	19.426	NOT
MKRN2	0.130275	8.14988	7.49579	3.12675e-13	7.76765e-12	19.4198	NOT
RPL30	0.272608	12.5449	7.49573	3.12799e-13	7.76765e-12	19.4194	UP
C5orf15	0.214166	9.01501	7.49485	3.1468e-13	7.79985e-12	19.4135	UP
MASTL	0.0475147	7.04719	7.49166	3.21621e-13	7.95713e-12	19.3923	NOT
SLMAP	0.218652	8.30821	7.49121	3.22601e-13	7.96662e-12	19.3893	UP
RABGAP1	-0.163235	8.79171	-7.49043	3.24335e-13	7.99467e-12	19.384	NOT
RBM25	0.288667	8.63441	7.48974	3.25877e-13	8.0179e-12	19.3794	UP
KPNA4	0.188202	9.05802	7.48924	3.26978e-13	8.02189e-12	19.3761	UP
BMI1	0.276484	8.25142	7.48912	3.2724e-13	8.02189e-12	19.3753	UP
COX7A2	0.332357	10.2612	7.48664	3.3285e-13	8.14446e-12	19.3588	UP
TFAM	0.197446	8.02418	7.48602	3.34249e-13	8.16375e-12	19.3547	UP
CCDC53	0.183453	8.17728	7.48177	3.44091e-13	8.3888e-12	19.3263	UP
LMBRD1	0.231218	10.0586	7.48084	3.46289e-13	8.4139e-12	19.3201	UP
TMEM59	0.203958	10.1617	7.4808	3.46381e-13	8.4139e-12	19.3199	UP
COPE	-0.143486	10.4266	-7.47746	3.54378e-13	8.59255e-12	19.2976	NOT
GPI	-0.20503	9.18902	-7.47381	3.63303e-13	8.79299e-12	19.2733	DOWN
CWF19L2	0.134601	7.58336	7.47349	3.64091e-13	8.79612e-12	19.2712	NOT
NIP7	0.148125	8.10531	7.47306	3.65171e-13	8.80628e-12	19.2683	NOT
RRAS2	0.0894049	7.18527	7.47206	3.67672e-13	8.85063e-12	19.2616	NOT
EVI2A	0.0615965	7.03189	7.47075	3.7097e-13	8.91395e-12	19.2529	NOT
WBP4	0.136223	7.54509	7.47047	3.71682e-13	8.91502e-12	19.2511	NOT
GPR137	-0.182042	9.2843	-7.46761	3.78999e-13	9.07425e-12	19.232	DOWN
RAB5A	0.171423	8.13084	7.46723	3.79976e-13	9.08136e-12	19.2295	NOT
FAM89B	-0.197432	9.97877	-7.46624	3.8255e-13	9.12654e-12	19.2229	DOWN
C17orf48	0.111916	7.34368	7.46501	3.85786e-13	9.18461e-12	19.2147	NOT
CCDC41	0.074058	7.13676	7.46479	3.86358e-13	9.18461e-12	19.2133	NOT
KIAA0528	0.255346	8.42845	7.46402	3.88396e-13	9.21664e-12	19.2081	UP
STK38L	0.0873681	7.16191	7.45723	4.06766e-13	9.62613e-12	19.163	NOT
WDR5B	0.0713067	7.12147	7.45712	4.07093e-13	9.62613e-12	19.1622	NOT
GMIP	-0.193471	8.94543	-7.45475	4.13693e-13	9.76491e-12	19.1465	DOWN
C10orf84	0.0514281	7.05109	7.45289	4.18985e-13	9.87e-12	19.1341	NOT
SMARCC2	-0.115947	8.10954	-7.45266	4.19623e-13	9.87e-12	19.1327	NOT
C11orf74	0.0518646	7.01669	7.45217	4.21041e-13	9.88596e-12	19.1294	NOT
HELZ	-0.138834	8.52167	-7.45072	4.25197e-13	9.96603e-12	19.1198	NOT
CSRP1	-0.140842	8.69601	-7.44892	4.30462e-13	1.00718e-11	19.1078	NOT
NDUFS4	0.270203	8.01376	7.44609	4.38813e-13	1.02492e-11	19.089	UP
MTERFD1	0.123546	7.66077	7.44325	4.47369e-13	1.04308e-11	19.0702	NOT
C1orf25	0.074301	7.27971	7.44217	4.50674e-13	1.04896e-11	19.063	NOT
PPP1R2	0.233272	8.44637	7.4397	4.58292e-13	1.06483e-11	19.0466	UP
SRP14P1	0.252764	8.99708	7.43435	4.75293e-13	1.10241e-11	19.0111	UP
ENOPH1	0.174203	7.81858	7.42817	4.95637e-13	1.14761e-11	18.9702	NOT
PRKAA1	0.168782	8.30435	7.41839	5.29667e-13	1.22282e-11	18.9054	NOT
EXOC3	-0.138774	8.31565	-7.41831	5.29949e-13	1.22282e-11	18.9049	NOT
CCDC97	-0.137619	8.89665	-7.4141	5.45316e-13	1.25611e-11	18.877	NOT
RIF1	0.0815654	7.06434	7.41283	5.50001e-13	1.26472e-11	18.8686	NOT
SACM1L	0.253938	7.88914	7.41229	5.52046e-13	1.26724e-11	18.865	UP
WASL	0.129892	7.60123	7.4104	5.59157e-13	1.28136e-11	18.8525	NOT
TPK1	0.116501	7.60414	7.40706	5.7196e-13	1.30846e-11	18.8304	NOT
MCM5	-0.157649	8.40651	-7.4026	5.89509e-13	1.3463e-11	18.801	NOT
ACTN1	-0.302996	10.9066	-7.39962	6.01511e-13	1.37136e-11	18.7813	DOWN
TMEM168	0.082736	7.18735	7.39872	6.05199e-13	1.37742e-11	18.7753	NOT
OGDH	-0.134069	8.17312	-7.39739	6.10667e-13	1.3875e-11	18.7665	NOT
NAE1	0.184163	8.28302	7.39559	6.18165e-13	1.40215e-11	18.7546	UP
ARPC4	-0.17065	11.0705	-7.38696	6.55307e-13	1.48388e-11	18.6977	NOT
SLC39A8	0.103553	7.2421	7.38219	6.76771e-13	1.52989e-11	18.6663	NOT
METAP2	0.224619	8.45433	7.38141	6.8036e-13	1.53541e-11	18.6611	UP
TLN1	-0.285971	9.53763	-7.3806	6.84104e-13	1.54125e-11	18.6558	DOWN
TOR1AIP2	0.0510164	7.05498	7.38034	6.85294e-13	1.54134e-11	18.6541	NOT
RRAGC	-0.156596	8.75679	-7.37717	7.00106e-13	1.572e-11	18.6332	NOT
ENO1	-0.195007	12.0351	-7.37576	7.06816e-13	1.58186e-11	18.6239	DOWN
ACADM	0.140829	7.61869	7.37575	7.06863e-13	1.58186e-11	18.6238	NOT
MKL1	-0.164833	8.30608	-7.37405	7.15048e-13	1.5975e-11	18.6126	NOT
SRP72	0.142658	7.67533	7.37265	7.21836e-13	1.60997e-11	18.6034	NOT
MITD1	0.167888	8.17784	7.3722	7.2404e-13	1.6122e-11	18.6004	NOT
FCHO2	0.162899	7.21568	7.36986	7.35526e-13	1.63505e-11	18.5851	NOT
ZNF45	0.0865193	7.30099	7.36613	7.54307e-13	1.67401e-11	18.5605	NOT
PCMTD2	0.222232	8.17329	7.36444	7.62924e-13	1.68823e-11	18.5494	UP
APOB48R	-0.193602	8.04078	-7.36438	7.6324e-13	1.68823e-11	18.549	DOWN
PLCB2	-0.216279	9.92459	-7.36077	7.8209e-13	1.72706e-11	18.5252	DOWN
SSR1	0.216468	9.25987	7.35515	8.12235e-13	1.78814e-11	18.4883	UP
THOC7	0.176834	9.24463	7.35512	8.12425e-13	1.78814e-11	18.488	NOT
BAZ2B	0.290719	8.97978	7.35432	8.16805e-13	1.79482e-11	18.4828	UP
OTUB1	-0.126266	7.80203	-7.34899	8.46669e-13	1.85462e-11	18.4478	NOT
RABGGTB	0.141754	7.67634	7.34897	8.46794e-13	1.85462e-11	18.4476	NOT
XRN1	0.209082	8.32118	7.34739	8.55868e-13	1.87142e-11	18.4372	UP
SLC39A10	0.0984765	7.14879	7.34363	8.77816e-13	1.91628e-11	18.4125	NOT
LSM3	0.303945	7.78492	7.34243	8.84903e-13	1.9286e-11	18.4047	UP
TSNAX	0.123735	7.51563	7.33922	9.04232e-13	1.96751e-11	18.3836	NOT
RBM15	0.169591	8.03887	7.3382	9.10452e-13	1.97783e-11	18.3769	NOT
SEMA4D	-0.173791	11.1922	-7.33655	9.20602e-13	1.99663e-11	18.3661	NOT
ITPKB	-0.164837	8.93635	-7.33257	9.45578e-13	2.04748e-11	18.34	NOT
PRMT3	0.135667	7.5981	7.32102	1.02191e-12	2.20917e-11	18.2643	NOT
ADO	0.16393	7.76618	7.31606	1.05649e-12	2.28024e-11	18.2318	NOT
SSBP3	-0.124808	7.60441	-7.31579	1.05842e-12	2.28073e-11	18.23	NOT
STK10	-0.174746	9.25356	-7.31371	1.07331e-12	2.30908e-11	18.2164	NOT
CTSD	-0.243996	9.57511	-7.31164	1.08829e-12	2.33755e-11	18.2029	DOWN
CPNE1	-0.207897	9.29132	-7.30895	1.10811e-12	2.3763e-11	18.1853	DOWN
SAP130	-0.12715	8.34	-7.30537	1.13505e-12	2.43017e-11	18.1619	NOT
HSDL2	0.167486	7.79	7.30311	1.15237e-12	2.46331e-11	18.1471	NOT
CD226	0.116618	7.26699	7.29954	1.18025e-12	2.51887e-11	18.1238	NOT
IPO13	-0.0886032	7.61233	-7.29821	1.19081e-12	2.53735e-11	18.1151	NOT
MRPL13	0.174743	7.45441	7.29774	1.19456e-12	2.5413e-11	18.112	NOT
PRRC1	0.138642	7.59346	7.29048	1.25406e-12	2.66363e-11	18.0646	NOT
ACSS1	-0.134737	8.28289	-7.28331	1.31569e-12	2.78952e-11	18.0178	NOT
TMEM188	0.11936	7.79019	7.28311	1.31751e-12	2.78952e-11	18.0165	NOT
XPO1	0.208412	8.77196	7.27762	1.36676e-12	2.88518e-11	17.9807	UP
COMMD3	0.256841	9.18706	7.27759	1.367e-12	2.88518e-11	17.9805	UP
VRK1	0.09094	7.24465	7.27664	1.37567e-12	2.89889e-11	17.9744	NOT
ZNF12	0.0972219	7.14678	7.27566	1.38473e-12	2.91339e-11	17.968	NOT
PHF3	0.123897	8.24249	7.27468	1.39381e-12	2.92789e-11	17.9616	NOT
MBIP	0.0842473	7.22894	7.27401	1.40011e-12	2.93649e-11	17.9572	NOT
KIAA0513	-0.220053	9.24591	-7.27146	1.42413e-12	2.9822e-11	17.9406	DOWN
RIPK1	-0.128677	8.48549	-7.27111	1.42753e-12	2.98464e-11	17.9383	NOT
SCAMP1	0.146228	7.66869	7.26967	1.44129e-12	3.0087e-11	17.9289	NOT
C14orf147	0.121247	7.41802	7.26677	1.46943e-12	3.06266e-11	17.9101	NOT
NDUFV1	-0.144173	9.40543	-7.26505	1.48643e-12	3.09325e-11	17.8989	NOT
MTDH	0.168875	8.09647	7.26311	1.50581e-12	3.12871e-11	17.8862	NOT
LEPROTL1	0.304212	8.75927	7.2624	1.51294e-12	3.13864e-11	17.8816	UP
GNAI3	0.193143	7.9073	7.26205	1.5165e-12	3.14115e-11	17.8793	UP
ZMYM2	0.100875	7.35047	7.26142	1.52289e-12	3.14951e-11	17.8752	NOT
DPM1	0.230834	8.3016	7.26017	1.53569e-12	3.17106e-11	17.8671	UP
C12orf41	0.168288	8.66045	7.25507	1.58878e-12	3.27563e-11	17.8339	NOT
SRM	-0.135455	8.10909	-7.25193	1.62241e-12	3.33981e-11	17.8135	NOT
RPS27L	0.198647	7.4645	7.24896	1.65486e-12	3.40137e-11	17.7942	UP
AASDH	0.104055	7.36092	7.24513	1.69757e-12	3.4838e-11	17.7694	NOT
CNIH	0.199448	8.40476	7.24347	1.71644e-12	3.51712e-11	17.7586	UP
C19orf2	0.187366	8.37446	7.24308	1.72093e-12	3.52092e-11	17.756	UP
ZDHHC13	0.0887932	7.25537	7.24227	1.73028e-12	3.53463e-11	17.7507	NOT
MTF1	-0.211997	8.88277	-7.24199	1.73349e-12	3.5358e-11	17.7489	DOWN
NIPSNAP3A	0.0830607	7.17572	7.24062	1.74942e-12	3.56284e-11	17.74	NOT
ALCAM	0.132223	7.49845	7.23766	1.78421e-12	3.62312e-11	17.7208	NOT
TYW3	0.0800919	7.1833	7.23764	1.78444e-12	3.62312e-11	17.7207	NOT
RYK	0.146965	7.6611	7.23695	1.79258e-12	3.63412e-11	17.7163	NOT
C18orf19	0.0391593	7.01455	7.23504	1.81552e-12	3.67505e-11	17.7039	NOT
DNAJC15	0.128672	7.55446	7.2342	1.82569e-12	3.69004e-11	17.6984	NOT
C1orf131	0.146322	8.04101	7.2309	1.86631e-12	3.76646e-11	17.677	NOT
RHEB	0.148533	8.68382	7.2294	1.88493e-12	3.79829e-11	17.6673	NOT
CLK1	0.0943818	7.14704	7.2285	1.89625e-12	3.81534e-11	17.6614	NOT
ZNF500	-0.101753	7.77609	-7.227	1.91529e-12	3.84787e-11	17.6517	NOT
YTHDF3	0.141734	7.9729	7.22504	1.94039e-12	3.89243e-11	17.639	NOT
NCOA5	-0.106711	8.2269	-7.22222	1.97718e-12	3.96029e-11	17.6207	NOT
MBD6	-0.22437	9.97069	-7.21995	2.00718e-12	4.01436e-11	17.606	DOWN
GFM1	0.13425	7.66787	7.21734	2.04223e-12	4.07835e-11	17.5891	NOT
RPL35A	0.277323	11.874	7.21591	2.06179e-12	4.11127e-11	17.5798	UP
CDKN2AIP	0.110097	7.55283	7.2155	2.06743e-12	4.11637e-11	17.5772	NOT
CD58	0.201184	8.1097	7.21205	2.11524e-12	4.20531e-11	17.5549	UP
USP38	0.167741	8.08736	7.21158	2.12188e-12	4.21223e-11	17.5518	NOT
BRMS1L	0.0630229	7.10157	7.21104	2.12949e-12	4.22107e-11	17.5484	NOT
MSN	-0.214691	11.995	-7.20879	2.16149e-12	4.27815e-11	17.5338	DOWN
FYB	0.256608	10.6731	7.2085	2.16576e-12	4.28025e-11	17.5319	UP
CHMP2B	0.152293	7.87958	7.20739	2.18179e-12	4.30188e-11	17.5247	NOT
LOC646567	0.166294	8.32941	7.20729	2.18314e-12	4.30188e-11	17.5241	NOT
NAPA	-0.166292	7.86355	-7.20688	2.18907e-12	4.30259e-11	17.5215	NOT
SLC38A6	0.0648803	7.08293	7.20682	2.18994e-12	4.30259e-11	17.5211	NOT
SSB	0.189323	8.11426	7.20558	2.20807e-12	4.33184e-11	17.513	UP
C12orf26	0.117986	7.59905	7.20534	2.21158e-12	4.33236e-11	17.5115	NOT
KIAA1012	0.201268	8.74765	7.20158	2.26749e-12	4.43538e-11	17.4871	UP
KIF5B	0.10377	7.36966	7.20066	2.28135e-12	4.45597e-11	17.4812	NOT
ZCCHC7	0.184201	8.12359	7.19946	2.29954e-12	4.47758e-11	17.4735	UP
ALG6	0.135152	7.94974	7.19932	2.30168e-12	4.47758e-11	17.4726	NOT
SP4	0.177547	7.63971	7.19927	2.30247e-12	4.47758e-11	17.4722	NOT
GATAD2A	-0.178761	10.1205	-7.19717	2.33475e-12	4.53376e-11	17.4586	DOWN
PDS5B	0.110318	7.39947	7.19365	2.3898e-12	4.63392e-11	17.4359	NOT
SEC16A	-0.194969	9.27445	-7.17888	2.63519e-12	5.10234e-11	17.3407	DOWN
ST3GAL1	-0.141509	8.68246	-7.17813	2.6483e-12	5.12031e-11	17.3358	NOT
PAF1	-0.161527	8.73977	-7.17388	2.72377e-12	5.25862e-11	17.3084	NOT
TAOK2	-0.107005	7.48763	-7.17043	2.78674e-12	5.37241e-11	17.2862	NOT
SMC6	0.0762883	7.0785	7.16887	2.81544e-12	5.41993e-11	17.2762	NOT
RPAIN	0.168419	8.24051	7.16534	2.88203e-12	5.54013e-11	17.2534	NOT
CCDC88A	0.0741402	7.09928	7.16384	2.91063e-12	5.58706e-11	17.2438	NOT
HSDL1	0.056859	7.06352	7.15915	3.00211e-12	5.74765e-11	17.2136	NOT
IMPA1	0.150646	7.31567	7.15911	3.00289e-12	5.74765e-11	17.2133	NOT
MRPL1	0.112701	7.12927	7.15489	3.08772e-12	5.90157e-11	17.1862	NOT
KLHDC2	0.200954	8.27629	7.15043	3.17999e-12	6.06925e-11	17.1575	UP
RPL15	0.25234	10.9326	7.14892	3.21167e-12	6.11232e-11	17.1478	UP
CRYZ	0.183343	7.5318	7.14892	3.21171e-12	6.11232e-11	17.1478	UP
PTPN11	0.173417	8.21032	7.14367	3.32481e-12	6.31856e-11	17.1141	NOT
LOC440354	0.118523	7.47856	7.14138	3.37532e-12	6.40543e-11	17.0994	NOT
CD2AP	0.0835956	7.13736	7.13761	3.46023e-12	6.55726e-11	17.0752	NOT
CCDC25	0.100095	7.41696	7.13043	3.62769e-12	6.86487e-11	17.0291	NOT
ZNF295	0.0932501	7.30416	7.12936	3.65341e-12	6.90375e-11	17.0222	NOT
CBWD5	0.103374	7.41928	7.12853	3.67331e-12	6.93155e-11	17.017	NOT
SRP19	0.153413	7.89744	7.12338	3.79987e-12	7.16027e-11	16.9839	NOT
LARP7	0.143795	7.59551	7.12057	3.87083e-12	7.2837e-11	16.9659	NOT
C10orf32	0.167821	7.81673	7.1196	3.89541e-12	7.31965e-11	16.9597	NOT
PKD2	0.096385	7.19633	7.11933	3.90228e-12	7.32226e-11	16.958	NOT
RDX	0.0814132	7.27083	7.11778	3.94223e-12	7.38684e-11	16.9481	NOT
LRRC40	0.0364423	6.99024	7.11431	4.03311e-12	7.54655e-11	16.9259	NOT
HGS	-0.140708	10.0023	-7.10561	4.27024e-12	7.97908e-11	16.8702	NOT
RPS27A	0.342375	10.7263	7.10343	4.33178e-12	8.07799e-11	16.8563	UP
FBXO30	0.123602	7.65255	7.10331	4.33527e-12	8.07799e-11	16.8555	NOT
TCFL5	0.134693	7.58639	7.09832	4.47957e-12	8.33524e-11	16.8236	NOT
RPS7	0.0668378	7.1298	7.09243	4.65578e-12	8.64922e-11	16.786	NOT
BMPR2	0.0974965	7.23315	7.09225	4.66125e-12	8.64922e-11	16.7849	NOT
NGDN	0.154577	7.72032	7.08816	4.78786e-12	8.87182e-11	16.7587	NOT
RAB4A	0.0889217	7.2886	7.08267	4.96294e-12	9.1835e-11	16.7238	NOT
SH3BP1	-0.204513	8.72626	-7.0796	5.06372e-12	9.35703e-11	16.7042	DOWN
GANAB	-0.111916	8.23464	-7.07893	5.08605e-12	9.38532e-11	16.6999	NOT
HMGN4	0.226568	9.66188	7.07743	5.13603e-12	9.45806e-11	16.6904	UP
IGBP1	0.171032	8.58472	7.07733	5.13964e-12	9.45806e-11	16.6897	NOT
RNF166	-0.131618	8.10222	-7.0763	5.17446e-12	9.50905e-11	16.6831	NOT
G3BP2	0.172935	8.56636	7.07589	5.18811e-12	9.52103e-11	16.6805	NOT
GNL3	0.159221	7.59547	7.07215	5.31663e-12	9.7435e-11	16.6567	NOT
MGRN1	-0.22423	8.67935	-7.06941	5.41268e-12	9.90594e-11	16.6392	DOWN
TRAPPC1	-0.147119	9.74087	-7.06862	5.44069e-12	9.94358e-11	16.6342	NOT
SCAMP2	-0.101598	7.47773	-7.06778	5.47063e-12	9.98465e-11	16.6289	NOT
GALNT1	0.118855	7.35256	7.06755	5.47874e-12	9.98581e-11	16.6274	NOT
TNPO2	-0.11694	8.91245	-7.06568	5.54619e-12	1.0095e-10	16.6155	NOT
MED28	0.158231	8.62958	7.05878	5.80182e-12	1.05459e-10	16.5716	NOT
TUBB2C	-0.19129	8.92131	-7.05844	5.81483e-12	1.05552e-10	16.5694	DOWN
ZNF30	0.0882362	7.21754	7.05793	5.83423e-12	1.05681e-10	16.5662	NOT
TMUB2	-0.127257	8.51539	-7.05783	5.83817e-12	1.05681e-10	16.5655	NOT
C10orf88	0.0870372	7.09242	7.05755	5.84866e-12	1.05681e-10	16.5638	NOT
KIF2A	0.111689	7.7862	7.05742	5.85361e-12	1.05681e-10	16.563	NOT
TMEM184B	-0.153822	8.32866	-7.05427	5.97527e-12	1.07732e-10	16.5429	NOT
C1orf52	0.174076	7.95681	7.05331	6.01288e-12	1.08264e-10	16.5368	NOT
RAB11FIP2	0.141238	7.54277	7.053	6.02483e-12	1.08333e-10	16.5349	NOT
VPS28	-0.199972	9.7703	-7.05122	6.09527e-12	1.09453e-10	16.5235	DOWN
ATG5	0.0889224	7.17256	7.04634	6.29247e-12	1.12842e-10	16.4925	NOT
UBA6	0.187511	7.46421	7.0445	6.36842e-12	1.14051e-10	16.4808	UP
TMEM14A	0.0978659	7.26588	7.04373	6.4004e-12	1.1447e-10	16.476	NOT
CKS2	0.110376	7.27492	7.04137	6.49975e-12	1.16092e-10	16.461	NOT
DMTF1	0.117838	7.88807	7.04092	6.51882e-12	1.16277e-10	16.4581	NOT
COPS5	0.197473	8.88858	7.0407	6.52801e-12	1.16286e-10	16.4567	UP
FAM3C	0.09138	7.11935	7.03777	6.65366e-12	1.18366e-10	16.4382	NOT
C8orf40	0.151409	8.02033	7.03528	6.76255e-12	1.20143e-10	16.4224	NOT
DVL3	-0.115884	7.95111	-7.03338	6.84665e-12	1.21476e-10	16.4103	NOT
KLHDC5	0.128558	7.73988	7.03126	6.94209e-12	1.23006e-10	16.3968	NOT
NLK	0.0715081	7.06543	7.03074	6.96522e-12	1.23252e-10	16.3936	NOT
MAST3	-0.223104	9.98909	-7.03044	6.97918e-12	1.23323e-10	16.3916	DOWN
NIF3L1	0.166596	8.60262	7.03025	6.98771e-12	1.23323e-10	16.3904	NOT
EFR3A	0.275656	9.07	7.02977	7.00956e-12	1.23394e-10	16.3874	UP
SLC44A1	0.188535	8.53063	7.02976	7.01016e-12	1.23394e-10	16.3873	UP
ITGA5	-0.198799	9.33564	-7.02746	7.11555e-12	1.25084e-10	16.3728	DOWN
USP11	-0.109375	7.73429	-7.01664	7.63422e-12	1.34025e-10	16.3043	NOT
CBARA1	-0.141459	8.22915	-7.01341	7.7962e-12	1.36689e-10	16.2838	NOT
MRPL48	0.112393	7.18059	7.01223	7.85597e-12	1.37557e-10	16.2764	NOT
KLHL2	0.180281	7.5333	7.01178	7.87901e-12	1.37779e-10	16.2735	UP
GRAMD1C	0.0510059	6.99163	7.01094	7.92235e-12	1.38356e-10	16.2682	NOT
RAP2C	0.166805	7.9333	7.0072	8.1169e-12	1.41569e-10	16.2446	NOT
IFNGR1	0.275397	10.6964	7.00632	8.16361e-12	1.42198e-10	16.239	UP
BSDC1	-0.116703	9.45983	-7.00429	8.27171e-12	1.43893e-10	16.2262	NOT
GOLT1B	0.17194	7.30028	7.00379	8.29841e-12	1.4417e-10	16.223	NOT
ZNF385A	-0.155924	7.94254	-7.00276	8.35412e-12	1.44949e-10	16.2165	NOT
GPR160	0.149478	7.41605	6.9992	8.54911e-12	1.4814e-10	16.194	NOT
B2M	0.25187	13.0342	6.99338	8.87803e-12	1.53641e-10	16.1573	UP
AP2M1	-0.225244	9.55949	-6.99303	8.89856e-12	1.53797e-10	16.155	DOWN
SBDS	0.121677	7.28395	6.99268	8.9184e-12	1.5394e-10	16.1528	NOT
SNX2	0.196543	8.88432	6.98985	9.08376e-12	1.56592e-10	16.135	UP
PDE4D	0.097886	7.2393	6.98953	9.10215e-12	1.56602e-10	16.133	NOT
CTDSPL2	0.0872824	7.32483	6.98944	9.10774e-12	1.56602e-10	16.1324	NOT
F8A1	-0.206392	8.76588	-6.98884	9.14292e-12	1.57004e-10	16.1286	DOWN
C20orf29	-0.0967064	7.6651	-6.98577	9.32705e-12	1.59961e-10	16.1092	NOT
SEC11C	0.2132	8.18109	6.98494	9.37728e-12	1.60616e-10	16.104	UP
ELF2	0.135431	7.81236	6.98044	9.65394e-12	1.65099e-10	16.0757	NOT
KLRB1	0.40794	9.53906	6.98029	9.66371e-12	1.65099e-10	16.0747	UP
DAXX	-0.124579	7.97882	-6.97941	9.71863e-12	1.65825e-10	16.0692	NOT
ARHGEF2	-0.144026	11.6674	-6.97893	9.749e-12	1.66131e-10	16.0661	NOT
BCAP31	-0.134487	10.4108	-6.97824	9.79289e-12	1.66555e-10	16.0618	NOT
ELF4	-0.178832	9.90702	-6.97814	9.7988e-12	1.66555e-10	16.0612	DOWN
EIF3M	0.212538	8.81537	6.97627	9.91793e-12	1.68365e-10	16.0494	UP
OBFC2A	0.263394	9.24164	6.97499	1.00006e-11	1.69554e-10	16.0413	UP
SLC9A1	-0.198014	9.09893	-6.97201	1.01953e-11	1.72635e-10	16.0225	DOWN
SFT2D3	0.0665938	7.1816	6.97151	1.02284e-11	1.72797e-10	16.0194	NOT
YEATS4	0.119806	7.27352	6.97147	1.02307e-11	1.72797e-10	16.0192	NOT
TRPV2	-0.147773	8.92972	-6.96973	1.03466e-11	1.74534e-10	16.0082	NOT
AATF	-0.159015	8.95155	-6.96901	1.0395e-11	1.75129e-10	16.0037	NOT
RAB5B	-0.139512	11.0379	-6.96759	1.04908e-11	1.7652e-10	15.9947	NOT
CHCHD7	0.102556	7.58198	6.96472	1.06869e-11	1.79593e-10	15.9767	NOT
CENPK	0.0916135	7.10493	6.96212	1.08683e-11	1.82413e-10	15.9603	NOT
ITM2A	0.181346	8.49099	6.95962	1.10447e-11	1.8514e-10	15.9446	UP
SHOC2	0.167253	8.21283	6.95785	1.11719e-11	1.87039e-10	15.9335	NOT
PSMG1	0.111421	7.4638	6.95297	1.15297e-11	1.92787e-10	15.9028	NOT
ITGA4	0.132804	7.62566	6.95089	1.16853e-11	1.95144e-10	15.8897	NOT
TMEM14B	0.233723	8.48238	6.95008	1.17466e-11	1.95924e-10	15.8846	UP
RNF138	0.13378	7.2664	6.94911	1.182e-11	1.96665e-10	15.8786	NOT
SPIN4	0.0829636	7.07929	6.9491	1.18205e-11	1.96665e-10	15.8785	NOT
GFPT1	0.057838	7.06121	6.94805	1.19012e-11	1.97762e-10	15.8719	NOT
ZNF558	0.0906278	7.17226	6.94668	1.20067e-11	1.99266e-10	15.8633	NOT
CSK	-0.170139	11.1749	-6.94557	1.20932e-11	2.00453e-10	15.8563	NOT
PIBF1	0.0454845	7.03376	6.94523	1.21192e-11	2.00635e-10	15.8542	NOT
EID1	0.0554739	7.11057	6.94275	1.23145e-11	2.03616e-10	15.8387	NOT
C17orf49	-0.158061	9.9935	-6.94134	1.24268e-11	2.05218e-10	15.8298	NOT
SNX6	0.0647599	7.14972	6.9389	1.2624e-11	2.08219e-10	15.8145	NOT
CXorf57	0.109368	7.21242	6.93784	1.27103e-11	2.09382e-10	15.8079	NOT
OTUD5	-0.118321	7.77481	-6.93556	1.28983e-11	2.12218e-10	15.7936	NOT
KCTD13	-0.11721	8.47334	-6.93527	1.29227e-11	2.12359e-10	15.7917	NOT
MED12	-0.129323	7.78694	-6.93449	1.29881e-11	2.1317e-10	15.7868	NOT
MYCBP	0.0516106	7.08305	6.93313	1.31016e-11	2.14769e-10	15.7784	NOT
ZNF700	0.116306	7.42847	6.93145	1.32447e-11	2.1685e-10	15.7678	NOT
RAB21	0.141805	8.03085	6.93061	1.33165e-11	2.17758e-10	15.7625	NOT
CXXC1	-0.167512	9.82542	-6.92884	1.34689e-11	2.19981e-10	15.7514	NOT
C7orf23	0.232832	8.50813	6.9251	1.37968e-11	2.25061e-10	15.728	UP
GNG10	0.135288	7.30564	6.92391	1.39022e-11	2.26504e-10	15.7206	NOT
ZNF770	0.135021	7.63665	6.9229	1.39934e-11	2.27713e-10	15.7142	NOT
BAT2	-0.160078	8.06385	-6.92134	1.41342e-11	2.29724e-10	15.7045	NOT
ZNF621	0.106717	7.48098	6.9204	1.42202e-11	2.30841e-10	15.6986	NOT
ACTR3	0.312439	8.50614	6.91993	1.4263e-11	2.31255e-10	15.6957	UP
MAP3K11	-0.188534	8.88918	-6.91967	1.42866e-11	2.31357e-10	15.6941	DOWN
UBQLN1	0.140079	8.47104	6.9194	1.43112e-11	2.31474e-10	15.6924	NOT
FBXO5	0.0834983	7.34256	6.91849	1.43959e-11	2.32563e-10	15.6866	NOT
NDST1	-0.166449	7.78293	-6.91824	1.44187e-11	2.3265e-10	15.6851	NOT
STIP1	-0.155899	8.77783	-6.9173	1.45064e-11	2.33783e-10	15.6792	NOT
NETO2	0.0649679	7.08118	6.91708	1.45269e-11	2.3383e-10	15.6778	NOT
RASGRP1	0.240104	7.87878	6.91427	1.47916e-11	2.37804e-10	15.6602	UP
ANKRD32	0.0840996	7.13578	6.9124	1.49701e-11	2.40386e-10	15.6486	NOT
FBXO8	0.0993371	7.70591	6.91095	1.51097e-11	2.42335e-10	15.6395	NOT
NDUFB2	0.274159	9.66225	6.90927	1.52741e-11	2.44678e-10	15.629	UP
PPWD1	0.145058	7.80841	6.90875	1.5325e-11	2.452e-10	15.6258	NOT
ACVR1	0.11628	7.73132	6.9074	1.54583e-11	2.47036e-10	15.6173	NOT
ARL6IP1	0.142733	8.63424	6.90721	1.54774e-11	2.47046e-10	15.6161	NOT
WASF2	-0.256779	9.87786	-6.90638	1.55603e-11	2.48074e-10	15.6109	DOWN
DGCR2	-0.153714	8.59846	-6.90394	1.58052e-11	2.51678e-10	15.5957	NOT
GOLGA2	-0.0912675	7.66575	-6.90336	1.58642e-11	2.52317e-10	15.5921	NOT
STARD10	-0.17363	8.25167	-6.90057	1.61513e-11	2.56577e-10	15.5746	NOT
PSMC2	0.203479	8.84199	6.89749	1.64735e-11	2.61384e-10	15.5554	UP
RNGTT	0.161777	8.20657	6.89218	1.7043e-11	2.701e-10	15.5223	NOT
RHOT1	0.200493	8.9842	6.89063	1.72138e-11	2.72483e-10	15.5126	UP
ATG9A	-0.155007	8.32466	-6.88443	1.791e-11	2.83169e-10	15.474	NOT
FAM19A1	0.0474478	6.98992	6.88346	1.80226e-11	2.84612e-10	15.4679	NOT
SETDB2	0.145888	7.94032	6.88313	1.806e-11	2.84866e-10	15.4659	NOT
CTSA	-0.249845	9.29591	-6.88287	1.80905e-11	2.85011e-10	15.4643	DOWN
PPCS	0.172067	8.89546	6.88235	1.81502e-11	2.85614e-10	15.4611	NOT
PSMA3	0.145465	7.75286	6.88171	1.82253e-11	2.86459e-10	15.4571	NOT
UPRT	0.100101	7.464	6.87864	1.85871e-11	2.91802e-10	15.4379	NOT
PIAS4	-0.155613	9.3262	-6.87817	1.86421e-11	2.92322e-10	15.435	NOT
MIS12	0.181733	8.23261	6.87697	1.87868e-11	2.94246e-10	15.4275	UP
FAM84B	0.123522	7.31214	6.87491	1.9036e-11	2.97799e-10	15.4147	NOT
STXBP2	-0.237232	10.7073	-6.87436	1.91023e-11	2.98487e-10	15.4113	DOWN
CAMLG	0.158319	10.0513	6.87158	1.9445e-11	3.03487e-10	15.394	NOT
TIMP1	-0.233488	11.7278	-6.87107	1.95084e-11	3.04121e-10	15.3908	DOWN
CLNS1A	0.224462	8.82318	6.87017	1.9621e-11	3.05521e-10	15.3852	UP
FIBP	-0.149935	9.26337	-6.86937	1.9722e-11	3.06467e-10	15.3802	NOT
IL17RA	-0.267552	9.45932	-6.86932	1.97277e-11	3.06467e-10	15.38	DOWN
CCNG2	0.144884	7.35981	6.86799	1.98961e-11	3.08724e-10	15.3717	NOT
DBI	0.134879	7.31864	6.86776	1.99253e-11	3.08819e-10	15.3703	NOT
KIAA1370	0.18406	8.05964	6.86645	2.00934e-11	3.11063e-10	15.3621	UP
TMEM55A	0.181447	7.73572	6.86411	2.03957e-11	3.15211e-10	15.3476	UP
DCUN1D4	0.131231	7.39731	6.86401	2.04085e-11	3.15211e-10	15.3469	NOT
APBB1IP	-0.231991	11.1034	-6.86085	2.08243e-11	3.21261e-10	15.3273	DOWN
PLRG1	0.154475	8.40165	6.8597	2.09781e-11	3.23261e-10	15.3202	NOT
KLHL20	0.0876991	7.2831	6.85894	2.10807e-11	3.24469e-10	15.3154	NOT
MIDN	-0.221277	9.83383	-6.857	2.1343e-11	3.28127e-10	15.3034	DOWN
DPF2	-0.158097	9.53725	-6.85658	2.14003e-11	3.2863e-10	15.3008	NOT
EFTUD2	-0.14473	8.82619	-6.85166	2.20819e-11	3.38707e-10	15.2703	NOT
ZMYM1	0.111851	7.38036	6.85094	2.21835e-11	3.39876e-10	15.2658	NOT
SEC24C	-0.132261	9.86858	-6.84944	2.23976e-11	3.42762e-10	15.2564	NOT
AGTPBP1	0.174834	9.03295	6.84919	2.24336e-11	3.4292e-10	15.2549	NOT
ZFYVE16	0.120423	7.38995	6.84894	2.24682e-11	3.43058e-10	15.2534	NOT
TYK2	-0.155017	10.8509	-6.84825	2.25681e-11	3.4419e-10	15.2491	NOT
FEZ2	0.189051	8.89821	6.84798	2.26066e-11	3.44383e-10	15.2474	UP
MCTS1	0.117676	7.14206	6.84297	2.33396e-11	3.55145e-10	15.2164	NOT
KCTD18	0.091629	7.24659	6.84153	2.35556e-11	3.58024e-10	15.2074	NOT
PHKA2	-0.15727	8.90297	-6.83921	2.39065e-11	3.62945e-10	15.193	NOT
DDX1	0.159773	8.76949	6.83834	2.40388e-11	3.64538e-10	15.1876	NOT
KIF13B	-0.0970339	7.85912	-6.83749	2.41696e-11	3.66107e-10	15.1823	NOT
RPS29	0.274077	10.6594	6.83651	2.43209e-11	3.67981e-10	15.1763	UP
EXTL3	-0.183908	8.46352	-6.83569	2.44488e-11	3.69497e-10	15.1712	DOWN
RFXANK	-0.114072	8.38855	-6.83491	2.45692e-11	3.70897e-10	15.1664	NOT
SMARCD2	-0.13496	8.38405	-6.8326	2.4933e-11	3.75965e-10	15.1521	NOT
ATP5F1	0.183222	9.18342	6.83203	2.50238e-11	3.76908e-10	15.1486	UP
FCHO1	-0.13115	7.99081	-6.83073	2.52325e-11	3.79624e-10	15.1405	NOT
MRPL39	0.121358	7.82346	6.82712	2.58183e-11	3.88001e-10	15.1181	NOT
LOC400027	0.16329	8.12789	6.82467	2.62234e-11	3.93646e-10	15.103	NOT
C9orf72	0.0848107	7.21989	6.82383	2.63643e-11	3.94879e-10	15.0978	NOT
CCS	-0.110087	7.75565	-6.82383	2.63647e-11	3.94879e-10	15.0978	NOT
TDG	0.167612	8.55356	6.82222	2.66349e-11	3.98479e-10	15.0878	NOT
KLRF1	0.282759	7.92479	6.82183	2.67017e-11	3.99032e-10	15.0854	UP
RENBP	-0.184573	9.10269	-6.821	2.68432e-11	4.00698e-10	15.0803	DOWN
MRPS18C	0.235314	8.23845	6.82081	2.68745e-11	4.00719e-10	15.0791	UP
CDC40	0.165587	8.69131	6.81702	2.75299e-11	4.10033e-10	15.0557	NOT
DLD	0.117203	7.5372	6.81391	2.80793e-11	4.17749e-10	15.0365	NOT
CLEC4A	0.20511	8.91023	6.81332	2.81843e-11	4.18846e-10	15.0328	UP
DHX36	0.105068	7.67999	6.81248	2.83348e-11	4.20007e-10	15.0277	NOT
RIN1	-0.072507	7.27443	-6.81237	2.83556e-11	4.20007e-10	15.0269	NOT
IRF3	-0.237841	9.48577	-6.81236	2.83568e-11	4.20007e-10	15.0269	DOWN
FCGRT	-0.179815	11.3766	-6.81167	2.84813e-11	4.21385e-10	15.0226	DOWN
INPPL1	-0.162441	9.17162	-6.80847	2.90654e-11	4.29551e-10	15.0029	NOT
SUSD5	-0.0781455	7.26167	-6.80625	2.94786e-11	4.35175e-10	14.9892	NOT
FOXJ2	-0.177513	9.65728	-6.80602	2.95206e-11	4.35315e-10	14.9878	NOT
GNG2	0.1955	8.29984	6.80322	3.00501e-11	4.42634e-10	14.9705	UP
MON2	0.142621	8.11597	6.80178	3.03268e-11	4.46218e-10	14.9616	NOT
YTHDC2	0.0722108	7.17928	6.79941	3.07857e-11	4.52448e-10	14.9469	NOT
USP6	0.0457622	6.99118	6.79924	3.08179e-11	4.52448e-10	14.9459	NOT
NSMCE4A	0.19656	8.55169	6.79715	3.12299e-11	4.57992e-10	14.933	UP
GPR108	-0.136899	8.36869	-6.79665	3.13283e-11	4.58515e-10	14.9299	NOT
BCAP29	0.0755508	7.22074	6.79662	3.13342e-11	4.58515e-10	14.9298	NOT
SH3BP5L	-0.152478	8.48715	-6.79535	3.15883e-11	4.61728e-10	14.9219	NOT
COPS2	0.0615368	7.02107	6.79492	3.16728e-11	4.62458e-10	14.9193	NOT
WAS	-0.203213	12.5331	-6.7944	3.17785e-11	4.63495e-10	14.9161	DOWN
STRN4	-0.100626	7.57926	-6.7913	3.24081e-11	4.72162e-10	14.897	NOT
WDR75	0.159214	8.18638	6.7901	3.26567e-11	4.75265e-10	14.8895	NOT
LIMA1	0.0743066	7.13849	6.78944	3.27932e-11	4.76314e-10	14.8855	NOT
IPO11	0.117995	7.60479	6.7894	3.28001e-11	4.76314e-10	14.8853	NOT
SLU7	0.170253	7.95774	6.78759	3.31779e-11	4.81278e-10	14.8741	NOT
RARS	0.116991	8.90087	6.78717	3.32673e-11	4.82052e-10	14.8715	NOT
ARID3A	-0.226297	9.77048	-6.78135	3.45147e-11	4.99584e-10	14.8357	DOWN
PKM2	-0.189808	7.92015	-6.78042	3.47201e-11	5.02014e-10	14.8299	DOWN
PTGER2	0.191943	8.53116	6.77962	3.4896e-11	5.04012e-10	14.825	UP
RNASEH1	-0.130042	8.4396	-6.77888	3.50592e-11	5.05822e-10	14.8205	NOT
ST3GAL6	0.128323	7.50733	6.77782	3.52953e-11	5.08678e-10	14.814	NOT
SEL1L	0.0482041	7.09217	6.77417	3.61185e-11	5.19981e-10	14.7915	NOT
TFIP11	-0.126277	8.77394	-6.77235	3.65372e-11	5.25443e-10	14.7803	NOT
COMMD2	0.126506	7.60585	6.77147	3.67396e-11	5.27297e-10	14.775	NOT
RNF14	0.165623	8.09974	6.77145	3.6745e-11	5.27297e-10	14.7748	NOT
SEPHS1	0.11488	7.43263	6.77119	3.68065e-11	5.27612e-10	14.7732	NOT
DPY19L4	0.046348	7.0056	6.77027	3.70206e-11	5.30113e-10	14.7675	NOT
IAH1	0.157644	8.1673	6.76991	3.71052e-11	5.30756e-10	14.7653	NOT
SNX10	0.263631	8.15668	6.76793	3.757e-11	5.36663e-10	14.7532	UP
TCTA	-0.137197	8.26974	-6.76768	3.76299e-11	5.36663e-10	14.7517	NOT
RPAP3	0.0825271	7.28165	6.76765	3.76387e-11	5.36663e-10	14.7514	NOT
TBL1X	-0.236191	10.1402	-6.76524	3.82139e-11	5.44283e-10	14.7367	DOWN
TMEM41B	0.176091	8.35983	6.7633	3.86864e-11	5.50427e-10	14.7247	NOT
SLC35F5	0.0779204	7.21927	6.76245	3.88948e-11	5.52803e-10	14.7195	NOT
ATP5O	0.292535	9.6871	6.76197	3.90118e-11	5.53876e-10	14.7166	UP
HIPK2	-0.11267	7.49998	-6.76164	3.90926e-11	5.54434e-10	14.7146	NOT
LYPLA2	-0.0987168	7.84953	-6.75926	3.96856e-11	5.62248e-10	14.6999	NOT
FAM65A	-0.172169	9.2075	-6.75585	4.05474e-11	5.73848e-10	14.679	NOT
RANBP6	0.0958788	7.31478	6.74996	4.20827e-11	5.94946e-10	14.6429	NOT
ZNF189	0.0569767	7.16301	6.74862	4.24404e-11	5.9937e-10	14.6347	NOT
ABHD3	0.238244	8.30249	6.74781	4.26553e-11	6.01768e-10	14.6297	UP
RICTOR	0.0460149	7.04366	6.74751	4.27367e-11	6.02281e-10	14.6279	NOT
OGFRL1	0.155729	7.66163	6.74686	4.29114e-11	6.04106e-10	14.6239	NOT
KIF21A	0.0865344	7.38199	6.74497	4.34255e-11	6.107e-10	14.6123	NOT
KIAA0020	0.117235	7.64075	6.74413	4.36572e-11	6.13312e-10	14.6072	NOT
FAM127A	-0.114041	8.416	-6.74186	4.42853e-11	6.21483e-10	14.5933	NOT
XPO4	0.122826	7.74593	6.73907	4.50703e-11	6.31836e-10	14.5762	NOT
DUSP18	-0.164662	9.29439	-6.73816	4.53294e-11	6.34802e-10	14.5706	NOT
CLPTM1	-0.170379	8.97183	-6.73632	4.58563e-11	6.41509e-10	14.5594	NOT
MTA2	-0.127915	8.47774	-6.7357	4.60375e-11	6.43369e-10	14.5555	NOT
C17orf62	-0.164137	10.3194	-6.73475	4.6313e-11	6.46543e-10	14.5497	NOT
C12orf23	0.0497369	6.9937	6.73259	4.69453e-11	6.54685e-10	14.5366	NOT
PARP11	0.0754332	7.19697	6.73224	4.70485e-11	6.55014e-10	14.5344	NOT
MKNK2	-0.191406	10.1664	-6.73218	4.70669e-11	6.55014e-10	14.534	DOWN
APIP	0.133944	7.58552	6.73148	4.7276e-11	6.57239e-10	14.5297	NOT
MDH1	0.215146	9.55369	6.73017	4.76652e-11	6.61962e-10	14.5217	UP
CHMP1A	-0.142709	9.1036	-6.72916	4.79697e-11	6.65498e-10	14.5156	NOT
C9orf46	0.131303	8.29406	6.72811	4.8288e-11	6.68989e-10	14.5091	NOT
AHCYL1	-0.152212	9.48635	-6.728	4.83214e-11	6.68989e-10	14.5085	NOT
ESCO1	0.0885836	7.15054	6.72078	5.05634e-11	6.98529e-10	14.4643	NOT
PRKCSH	-0.128761	8.71046	-6.72065	5.06054e-11	6.98529e-10	14.4635	NOT
GMNN	0.0463017	7.00476	6.72063	5.0612e-11	6.98529e-10	14.4634	NOT
CCDC112	0.0794201	7.20567	6.71722	5.1707e-11	7.12905e-10	14.4426	NOT
CHUK	0.131241	7.94761	6.71623	5.20309e-11	7.16631e-10	14.4365	NOT
OTUD6B	0.0990167	7.16132	6.71568	5.221e-11	7.18358e-10	14.4332	NOT
MRPL22	0.152328	7.69301	6.71459	5.25669e-11	7.22525e-10	14.4266	NOT
TMEM135	0.0572807	7.07443	6.71065	5.38852e-11	7.39883e-10	14.4025	NOT
APBA3	-0.124544	8.76022	-6.70746	5.49717e-11	7.54026e-10	14.3831	NOT
NUP37	0.131527	8.08596	6.70352	5.63486e-11	7.71555e-10	14.359	NOT
SRP9	0.237333	8.44033	6.70347	5.63651e-11	7.71555e-10	14.3587	UP
RPL35	0.29156	11.0927	6.69926	5.78728e-11	7.91383e-10	14.3331	UP
SF3B14	0.254189	8.82509	6.69611	5.90256e-11	8.06321e-10	14.3139	UP
FMNL1	-0.148421	7.84573	-6.69576	5.91564e-11	8.07282e-10	14.3117	NOT
SORL1	-0.304025	11.339	-6.6948	5.95127e-11	8.11316e-10	14.3059	DOWN
ZYX	-0.256481	11.0782	-6.69251	6.03731e-11	8.22206e-10	14.2919	DOWN
LANCL1	0.156734	8.07361	6.68978	6.1412e-11	8.35504e-10	14.2754	NOT
SKIV2L	-0.129882	8.81169	-6.68603	6.28703e-11	8.54473e-10	14.2525	NOT
NRAS	0.0714315	7.29015	6.68553	6.30694e-11	8.56308e-10	14.2495	NOT
SKI	-0.0769852	7.40262	-6.6853	6.31579e-11	8.56639e-10	14.2481	NOT
PAN3	0.167918	9.27727	6.68306	6.40514e-11	8.67174e-10	14.2344	NOT
TPP1	-0.23065	10.3047	-6.68302	6.40644e-11	8.67174e-10	14.2342	DOWN
COPS8	0.112663	7.52154	6.67997	6.52986e-11	8.82189e-10	14.2157	NOT
TMBIM4	0.172759	11.318	6.67995	6.53057e-11	8.82189e-10	14.2156	NOT
ATG7	-0.166684	8.7767	-6.67913	6.56439e-11	8.85861e-10	14.2106	NOT
GBF1	-0.0997382	7.61683	-6.67841	6.59373e-11	8.88923e-10	14.2062	NOT
PIM2	-0.14505	10.1423	-6.67425	6.7675e-11	9.11429e-10	14.1809	NOT
POR	-0.133534	8.12496	-6.67314	6.81474e-11	9.16867e-10	14.1742	NOT
FBXO28	0.0950823	7.6374	6.67024	6.93898e-11	9.32644e-10	14.1566	NOT
PUF60	-0.169274	10.3289	-6.66851	7.01451e-11	9.41847e-10	14.1461	NOT
RRP15	0.0857673	7.2323	6.66455	7.1901e-11	9.64455e-10	14.1221	NOT
TIGD6	-0.0561759	7.1335	-6.66419	7.20641e-11	9.65674e-10	14.1199	NOT
IKBKE	-0.121681	8.10602	-6.66358	7.23355e-11	9.6834e-10	14.1162	NOT
NXF1	-0.114991	9.75387	-6.6634	7.24179e-11	9.68471e-10	14.1151	NOT
RELA	-0.108671	7.74918	-6.66195	7.30766e-11	9.76303e-10	14.1063	NOT
DUT	0.0892122	7.27802	6.66021	7.38758e-11	9.85994e-10	14.0957	NOT
TSC22D2	0.153962	7.65059	6.65711	7.53139e-11	1.00418e-09	14.077	NOT
RPAP2	0.0995514	7.48568	6.65692	7.54044e-11	1.00439e-09	14.0758	NOT
STK11IP	-0.101121	7.92069	-6.65658	7.55671e-11	1.00555e-09	14.0737	NOT
FGFR1OP2	0.137102	7.4347	6.65624	7.57273e-11	1.00668e-09	14.0717	NOT
TPT1	0.35236	11.0792	6.65328	7.7138e-11	1.02442e-09	14.0537	UP
CCNF	-0.0763983	7.38021	-6.65309	7.72284e-11	1.0246e-09	14.0526	NOT
BCL9L	-0.0941447	7.5381	-6.65001	7.87244e-11	1.04341e-09	14.0339	NOT
RG9MTD1	0.092069	7.124	6.64856	7.94359e-11	1.0518e-09	14.0252	NOT
METTL5	0.15095	7.61247	6.64745	7.99862e-11	1.05804e-09	14.0185	NOT
CSTF3	0.079203	7.26132	6.64445	8.1495e-11	1.07693e-09	14.0003	NOT
ITGB3BP	0.0575303	7.0259	6.64408	8.16827e-11	1.07834e-09	13.9981	NOT
PDPR	-0.142522	8.01312	-6.64371	8.18723e-11	1.07978e-09	13.9958	NOT
KIAA0913	-0.142961	9.39419	-6.64333	8.20669e-11	1.08128e-09	13.9935	NOT
CCPG1	0.151787	7.88007	6.63783	8.49256e-11	1.11784e-09	13.9602	NOT
C7orf36	0.0613091	7.07685	6.63709	8.5316e-11	1.12187e-09	13.9558	NOT
RIMS4	-0.0801533	7.24703	-6.635	8.64342e-11	1.13546e-09	13.9431	NOT
ABHD2	-0.125033	7.77708	-6.6337	8.71344e-11	1.14353e-09	13.9353	NOT
FEM1B	0.0535867	7.0961	6.63337	8.73148e-11	1.14477e-09	13.9333	NOT
MAP4K5	0.084048	7.18002	6.62884	8.98054e-11	1.17627e-09	13.9059	NOT
MRPS31	0.164183	8.18731	6.62784	9.03648e-11	1.18244e-09	13.8999	NOT
DPH5	0.140374	7.5557	6.62294	9.31547e-11	1.21776e-09	13.8703	NOT
MKL2	0.0306581	6.97499	6.61862	9.56909e-11	1.24853e-09	13.8442	NOT
GLT25D1	-0.131724	9.6968	-6.61861	9.56953e-11	1.24853e-09	13.8442	NOT
ELOVL5	0.271024	8.88854	6.61566	9.74625e-11	1.27034e-09	13.8264	UP
ATG16L2	-0.195231	8.95567	-6.61495	9.78921e-11	1.2747e-09	13.8221	DOWN
LOC728653	-0.153811	8.14327	-6.61188	9.97759e-11	1.29796e-09	13.8036	NOT
ST13	0.150601	7.9763	6.6095	1.01258e-10	1.31597e-09	13.7893	NOT
NOMO1	-0.0984342	7.56042	-6.60901	1.01568e-10	1.31782e-09	13.7863	NOT
CD164	0.117658	7.23528	6.60888	1.01648e-10	1.31782e-09	13.7855	NOT
C14orf138	0.183474	7.86756	6.6088	1.01697e-10	1.31782e-09	13.7851	UP
CEP57	0.071808	7.09074	6.60845	1.01919e-10	1.31941e-09	13.783	NOT
VPS18	-0.123663	8.03768	-6.60822	1.02065e-10	1.32003e-09	13.7816	NOT
CCNH	0.106136	7.39122	6.60724	1.02689e-10	1.32681e-09	13.7757	NOT
PSMB2	-0.124063	9.36467	-6.60283	1.0553e-10	1.3622e-09	13.7491	NOT
POLR2B	0.133199	8.31255	6.6002	1.07261e-10	1.38322e-09	13.7333	NOT
GDI2	0.233606	9.50957	6.59965	1.07627e-10	1.3866e-09	13.73	UP
PRPF4B	0.114023	7.65016	6.59916	1.07959e-10	1.38884e-09	13.727	NOT
C1GALT1	0.10557	7.22456	6.59897	1.08083e-10	1.38884e-09	13.7259	NOT
GNPDA2	0.0987797	7.34746	6.59893	1.08113e-10	1.38884e-09	13.7256	NOT
ZUFSP	0.0868076	7.30874	6.59768	1.08947e-10	1.39821e-09	13.7182	NOT
TBL1XR1	0.117906	7.46866	6.59679	1.09552e-10	1.40462e-09	13.7128	NOT
APOBEC3C	-0.124835	7.89131	-6.59621	1.09947e-10	1.40834e-09	13.7093	NOT
ZNF597	0.0362601	7.02075	6.59241	1.12564e-10	1.44047e-09	13.6864	NOT
USP25	0.0511707	7.03042	6.59091	1.13609e-10	1.45245e-09	13.6775	NOT
DDX46	0.117482	7.81161	6.59004	1.14228e-10	1.45898e-09	13.6722	NOT
ECH1	-0.159646	10.2459	-6.58852	1.15304e-10	1.47131e-09	13.6631	NOT
GALC	0.121979	7.94789	6.58787	1.15769e-10	1.47583e-09	13.6592	NOT
HMGCS1	0.133138	7.63459	6.58735	1.16142e-10	1.47918e-09	13.656	NOT
TRIAP1	0.111987	7.59209	6.58645	1.16787e-10	1.48597e-09	13.6506	NOT
CMTM6	0.229987	10.1907	6.58589	1.17191e-10	1.48969e-09	13.6473	UP
ZFP161	0.111626	7.8958	6.5829	1.19376e-10	1.51603e-09	13.6293	NOT
SCML1	0.0611843	7.02311	6.57923	1.22115e-10	1.54934e-09	13.6073	NOT
BRCC3	0.0704701	7.18361	6.57797	1.23072e-10	1.56e-09	13.5997	NOT
CCDC66	0.0934469	7.29555	6.57719	1.23665e-10	1.56603e-09	13.595	NOT
FLOT1	-0.207286	10.1676	-6.57485	1.25462e-10	1.58729e-09	13.581	DOWN
SLC11A2	0.0975551	7.59759	6.57467	1.25606e-10	1.58761e-09	13.5799	NOT
VCP	-0.14841	8.51455	-6.57419	1.25974e-10	1.59075e-09	13.5771	NOT
UBAP2L	-0.139813	8.71955	-6.57321	1.2674e-10	1.59891e-09	13.5712	NOT
NRIP1	0.108385	7.81347	6.57084	1.28609e-10	1.62096e-09	13.557	NOT
SEMA4A	-0.269782	9.61772	-6.57032	1.2902e-10	1.6246e-09	13.5539	DOWN
CYFIP2	-0.18788	11.1244	-6.57001	1.29269e-10	1.62621e-09	13.552	DOWN
RPS25	0.252012	13.0193	6.56973	1.29489e-10	1.62744e-09	13.5503	UP
CASC3	-0.206284	9.83422	-6.56673	1.31911e-10	1.65633e-09	13.5323	DOWN
MAP3K8	0.167357	8.06174	6.56487	1.33431e-10	1.67252e-09	13.5212	NOT
DOPEY1	0.0601001	7.10522	6.56485	1.33451e-10	1.67252e-09	13.5211	NOT
RPS18	0.347416	10.5814	6.56416	1.34019e-10	1.67806e-09	13.5169	UP
LIPT1	0.103348	7.47495	6.56374	1.34364e-10	1.6808e-09	13.5144	NOT
C1orf63	0.244577	8.32665	6.56287	1.35088e-10	1.68828e-09	13.5092	UP
C6orf62	0.182993	10.0709	6.55934	1.38057e-10	1.72378e-09	13.4881	UP
STAU2	0.0889619	7.29118	6.55854	1.38741e-10	1.7307e-09	13.4833	NOT
XAB2	-0.146052	9.02151	-6.55813	1.39096e-10	1.73254e-09	13.4808	NOT
ZBTB11	0.0792398	7.08697	6.55806	1.39148e-10	1.73254e-09	13.4804	NOT
LOC374443	0.0703351	7.17675	6.55544	1.4142e-10	1.75919e-09	13.4647	NOT
RPL27	0.350619	11.7716	6.55495	1.41842e-10	1.7628e-09	13.4618	UP
VPS37A	0.0592967	7.10745	6.55348	1.43129e-10	1.77715e-09	13.453	NOT
TGDS	0.102462	7.49334	6.54759	1.48417e-10	1.84108e-09	13.4178	NOT
SNRPB	-0.13127	10.1621	-6.54687	1.4908e-10	1.84759e-09	13.4135	NOT
FOXO3	-0.259795	11.4289	-6.54619	1.49703e-10	1.8536e-09	13.4094	DOWN
EID3	0.0585241	7.07416	6.5442	1.51548e-10	1.87471e-09	13.3975	NOT
CRLF2	-0.0665725	7.08003	-6.53948	1.5601e-10	1.92812e-09	13.3693	NOT
CDC5L	0.120122	7.45301	6.53798	1.57452e-10	1.94414e-09	13.3604	NOT
RARA	-0.197957	10.498	-6.53733	1.58086e-10	1.95017e-09	13.3565	DOWN
ALG3	-0.104661	8.25536	-6.53615	1.59236e-10	1.96254e-09	13.3494	NOT
TRIM23	0.0932757	7.4581	6.53592	1.59456e-10	1.96344e-09	13.3481	NOT
ARID4A	0.0784164	7.17003	6.53527	1.60092e-10	1.96945e-09	13.3442	NOT
BUD13	-0.0615957	7.70054	-6.53402	1.61333e-10	1.9829e-09	13.3367	NOT
HNRPLL	0.0876176	7.23057	6.53335	1.61991e-10	1.98857e-09	13.3328	NOT
PGLS	-0.12343	9.9666	-6.53325	1.62092e-10	1.98857e-09	13.3322	NOT
LSM14A	0.150963	9.4824	6.53173	1.63618e-10	2.00545e-09	13.3231	NOT
KDELC2	0.0922691	7.24154	6.53099	1.6436e-10	2.01269e-09	13.3187	NOT
ACSL4	0.138044	7.66058	6.53064	1.64713e-10	2.01517e-09	13.3166	NOT
C10orf137	0.121072	7.63035	6.52881	1.66576e-10	2.0361e-09	13.3057	NOT
ZCCHC17	0.109934	8.12592	6.52647	1.68988e-10	2.06369e-09	13.2917	NOT
ZNF350	0.0853614	7.3318	6.52395	1.71617e-10	2.09388e-09	13.2767	NOT
B3GALTL	0.0542445	7.08908	6.52275	1.72885e-10	2.10743e-09	13.2696	NOT
MRPL42	0.0601164	7.18722	6.51861	1.77334e-10	2.15969e-09	13.2449	NOT
INTS2	0.090201	7.16796	6.51518	1.81102e-10	2.20358e-09	13.2245	NOT
SPHAR	0.0472912	7.0172	6.51427	1.82113e-10	2.21186e-09	13.2191	NOT
RBM7	0.110971	7.29244	6.51424	1.82143e-10	2.21186e-09	13.2189	NOT
MED24	-0.0964712	7.78431	-6.51412	1.8228e-10	2.21186e-09	13.2182	NOT
COPG	-0.110579	8.2141	-6.51364	1.82822e-10	2.21643e-09	13.2153	NOT
DNAJA1	0.241249	9.83191	6.51317	1.8335e-10	2.22081e-09	13.2125	UP
DDX24	-0.166291	9.32096	-6.51279	1.83766e-10	2.22384e-09	13.2103	NOT
CCDC59	0.174669	8.66598	6.51259	1.83993e-10	2.22457e-09	13.2091	NOT
GRPEL2	0.137582	7.74234	6.50971	1.87273e-10	2.26217e-09	13.1919	NOT
GTF3C5	-0.0996427	8.20484	-6.50956	1.87449e-10	2.26226e-09	13.191	NOT
FAM120A	0.197768	10.2354	6.50647	1.91029e-10	2.30339e-09	13.1726	UP
DUSP12	0.139162	8.39394	6.50376	1.94218e-10	2.33972e-09	13.1566	NOT
CRIPT	0.127705	8.07171	6.50052	1.98102e-10	2.38437e-09	13.1373	NOT
DERL1	0.150919	8.53497	6.49767	2.01587e-10	2.42412e-09	13.1204	NOT
TBPL1	0.141708	8.61202	6.49737	2.01958e-10	2.42641e-09	13.1186	NOT
TRPC1	0.0548575	7.03148	6.49611	2.0353e-10	2.4431e-09	13.1111	NOT
ZNF324	-0.140202	8.57448	-6.49433	2.05757e-10	2.46761e-09	13.1005	NOT
FBXO33	0.194041	8.67499	6.49233	2.0828e-10	2.49563e-09	13.0887	UP
RNF24	-0.292114	10.4248	-6.48923	2.12265e-10	2.54109e-09	13.0703	DOWN
DUS4L	0.0603508	7.16703	6.4884	2.13344e-10	2.55172e-09	13.0654	NOT
ELOVL1	-0.083698	7.97681	-6.48671	2.15563e-10	2.57596e-09	13.0553	NOT
PPP2R3C	0.180768	8.91047	6.48584	2.16711e-10	2.58737e-09	13.0502	UP
KLRA1	0.05267	7.03336	6.48436	2.18679e-10	2.60853e-09	13.0414	NOT
RPL11	0.241861	12.2603	6.48169	2.22267e-10	2.64896e-09	13.0256	UP
PEF1	-0.101186	8.39965	-6.48031	2.2414e-10	2.66734e-09	13.0174	NOT
C20orf197	0.0542165	7.06293	6.48026	2.24208e-10	2.66734e-09	13.0171	NOT
ITGAL	-0.181359	9.61491	-6.47917	2.25711e-10	2.68282e-09	13.0106	DOWN
PRNP	0.258127	9.48445	6.47721	2.28429e-10	2.71272e-09	12.999	UP
CXCR7	0.102331	7.29976	6.4756	2.30684e-10	2.73707e-09	12.9895	NOT
SYNJ1	0.171321	7.76872	6.47297	2.34413e-10	2.77676e-09	12.9739	NOT
C10orf78	0.0576563	7.11591	6.47294	2.34445e-10	2.77676e-09	12.9738	NOT
RIC8A	-0.10424	9.35863	-6.47147	2.36568e-10	2.79497e-09	12.965	NOT
TREML2	-0.174807	8.30287	-6.47146	2.36577e-10	2.79497e-09	12.965	NOT
GATAD2B	-0.154001	8.3358	-6.47136	2.36716e-10	2.79497e-09	12.9644	NOT
UCHL3	0.114687	7.62706	6.47129	2.36819e-10	2.79497e-09	12.964	NOT
SR140	0.0854095	7.87355	6.46959	2.39287e-10	2.8216e-09	12.9539	NOT
FAM45A	0.183426	8.92718	6.46059	2.52776e-10	2.97803e-09	12.9007	UP
UBLCP1	0.212245	8.04766	6.46029	2.53232e-10	2.98078e-09	12.8989	UP
CENPQ	0.0325266	6.95107	6.45904	2.55175e-10	3.001e-09	12.8915	NOT
RSRC2	0.171089	8.44312	6.4546	2.62154e-10	3.08036e-09	12.8653	NOT
RNF103	0.121718	8.26763	6.45084	2.68227e-10	3.14895e-09	12.8431	NOT
C18orf21	0.0941553	7.79074	6.4502	2.69271e-10	3.15843e-09	12.8393	NOT
WNK1	-0.194169	7.84795	-6.44954	2.70347e-10	3.16828e-09	12.8354	DOWN
MRPS33	0.163279	7.69152	6.44803	2.72838e-10	3.19466e-09	12.8265	NOT
ABHD10	0.116227	7.53532	6.44662	2.75186e-10	3.21934e-09	12.8182	NOT
PTOV1	-0.1343	9.60774	-6.44355	2.80368e-10	3.27447e-09	12.8001	NOT
HMGB1	0.115134	7.14899	6.44348	2.80483e-10	3.27447e-09	12.7997	NOT
COPB1	0.14745	9.01228	6.4434	2.80633e-10	3.27447e-09	12.7992	NOT
HPRT1	0.127687	8.15407	6.4426	2.8199e-10	3.28743e-09	12.7945	NOT
ZMYM4	0.0790722	7.43118	6.43962	2.87146e-10	3.34462e-09	12.7769	NOT
KRR1	0.0520403	7.0782	6.43946	2.87429e-10	3.34499e-09	12.776	NOT
TM2D1	0.188697	8.03543	6.43859	2.88947e-10	3.35973e-09	12.7708	UP
ATP5L	0.20045	9.06365	6.43694	2.91844e-10	3.39047e-09	12.7612	UP
PDCD6IP	0.120582	7.93592	6.43639	2.92821e-10	3.39886e-09	12.7579	NOT
ZFP37	0.0442561	7.043	6.43563	2.94181e-10	3.41168e-09	12.7534	NOT
OS9	-0.1327	8.25808	-6.43521	2.94929e-10	3.41739e-09	12.751	NOT
VPS4B	0.195842	9.64176	6.43445	2.96297e-10	3.43027e-09	12.7465	UP
MIER1	0.14077	8.46375	6.43162	3.01425e-10	3.48661e-09	12.7298	NOT
ATP6AP1	-0.167045	10.9555	-6.4309	3.02741e-10	3.49881e-09	12.7256	NOT
DCK	0.170103	7.9859	6.43006	3.04299e-10	3.51377e-09	12.7206	NOT
EPN1	-0.160248	10.841	-6.42744	3.09159e-10	3.5668e-09	12.7052	NOT
NRM	-0.0877233	7.53368	-6.42598	3.11921e-10	3.59539e-09	12.6966	NOT
ZNF721	0.148683	7.47793	6.42584	3.12175e-10	3.59539e-09	12.6958	NOT
APEX2	-0.0884951	8.21346	-6.42474	3.1426e-10	3.61629e-09	12.6893	NOT
ACIN1	-0.111614	9.03431	-6.42361	3.16427e-10	3.6381e-09	12.6827	NOT
SNRK	0.211839	9.00194	6.42226	3.19028e-10	3.66484e-09	12.6747	UP
CIC	-0.125378	7.98384	-6.41983	3.23757e-10	3.71597e-09	12.6604	NOT
SPTAN1	-0.163728	8.46402	-6.41773	3.27897e-10	3.76026e-09	12.6481	NOT
YIPF5	0.0724496	7.10642	6.41707	3.29221e-10	3.77221e-09	12.6442	NOT
TARS	0.127317	7.66771	6.41636	3.3063e-10	3.7851e-09	12.64	NOT
CHD4	-0.16585	9.17692	-6.41465	3.3407e-10	3.82121e-09	12.63	NOT
C9orf86	-0.0754372	7.61484	-6.41357	3.36266e-10	3.84304e-09	12.6236	NOT
GPBP1L1	0.0937305	7.46406	6.41222	3.3901e-10	3.87109e-09	12.6158	NOT
ACAT1	0.161084	7.97231	6.40713	3.49624e-10	3.98888e-09	12.5858	NOT
COQ2	0.142464	8.0581	6.40372	3.56912e-10	4.06855e-09	12.5658	NOT
TIA1	0.110473	7.46099	6.40291	3.58645e-10	4.08482e-09	12.5611	NOT
GRSF1	0.116987	8.24119	6.4023	3.59969e-10	4.09641e-09	12.5575	NOT
SNAPC5	0.0541479	7.08934	6.39814	3.69135e-10	4.19715e-09	12.5331	NOT
PM20D2	0.0529443	7.04678	6.39622	3.73439e-10	4.24247e-09	12.5219	NOT
API5	0.164667	8.5332	6.39587	3.74229e-10	4.24784e-09	12.5198	NOT
SLC25A13	0.0957073	7.28241	6.39451	3.77318e-10	4.27926e-09	12.5118	NOT
OXSM	0.0607485	7.17671	6.39198	3.83137e-10	4.34157e-09	12.497	NOT
ALS2CR4	0.0409181	7.04616	6.38861	3.91006e-10	4.42698e-09	12.4773	NOT
C12orf4	0.0672121	7.36325	6.3869	3.9505e-10	4.46899e-09	12.4673	NOT
CYP1B1	0.262418	8.17912	6.38626	3.96575e-10	4.48243e-09	12.4635	UP
CD82	-0.155323	8.49771	-6.38519	3.99158e-10	4.50782e-09	12.4572	NOT
ERH	0.217727	8.45674	6.38365	4.02879e-10	4.546e-09	12.4482	UP
C14orf102	-0.0985322	8.42007	-6.3812	4.08881e-10	4.60984e-09	12.4339	NOT
C1orf59	0.161792	8.74518	6.3768	4.19843e-10	4.72943e-09	12.4082	NOT
MYST3	-0.196968	10.3531	-6.3765	4.20611e-10	4.73409e-09	12.4064	DOWN
PDCD2	0.110417	8.07743	6.37476	4.25041e-10	4.77992e-09	12.3963	NOT
CCDC91	0.066199	7.07949	6.3735	4.28283e-10	4.81233e-09	12.3889	NOT
CLEC7A	0.0669123	7.09705	6.3723	4.31396e-10	4.84323e-09	12.3819	NOT
POLR2A	-0.201659	9.93002	-6.37165	4.33094e-10	4.85821e-09	12.3781	DOWN
EIF3J	0.0873247	7.44962	6.36985	4.37806e-10	4.90695e-09	12.3676	NOT
C1orf163	0.0437368	7.0608	6.36954	4.38604e-10	4.90976e-09	12.3658	NOT
PTGES3	0.224203	8.08325	6.36936	4.39083e-10	4.90976e-09	12.3647	UP
NCKAP1L	-0.15598	9.46208	-6.36933	4.39159e-10	4.90976e-09	12.3646	NOT
ADAT1	-0.11725	8.40482	-6.36907	4.39861e-10	4.9135e-09	12.363	NOT
PTPN12	0.151505	8.11571	6.36271	4.57017e-10	5.10087e-09	12.3259	NOT
NUP88	0.149535	8.44364	6.36199	4.59006e-10	5.11879e-09	12.3217	NOT
DYSF	-0.332281	11.0256	-6.3609	4.62004e-10	5.14794e-09	12.3154	DOWN
LLGL1	-0.104492	8.05709	-6.35895	4.6746e-10	5.20438e-09	12.304	NOT
RDBP	-0.0798797	7.67082	-6.35829	4.69329e-10	5.22085e-09	12.3001	NOT
GTF3C3	0.104988	7.74658	6.35499	4.78709e-10	5.32075e-09	12.2809	NOT
SEC11A	0.193526	9.42291	6.35414	4.81161e-10	5.34356e-09	12.276	UP
ALG13	0.105893	7.50937	6.34927	4.95444e-10	5.49762e-09	12.2476	NOT
FEM1C	0.184789	8.41039	6.34776	4.9995e-10	5.54301e-09	12.2388	UP
SAV1	0.0452442	7.02615	6.34646	5.0389e-10	5.58206e-09	12.2312	NOT
TMEM60	0.120773	8.82957	6.34175	5.18319e-10	5.73715e-09	12.2038	NOT
PLEKHM2	-0.116501	9.47663	-6.34072	5.21529e-10	5.7679e-09	12.1978	NOT
NPEPL1	-0.109104	8.18353	-6.33946	5.25497e-10	5.80698e-09	12.1904	NOT
COPA	-0.138109	10.1535	-6.33863	5.28102e-10	5.83094e-09	12.1856	NOT
PNKP	-0.12621	8.85845	-6.33665	5.3442e-10	5.89327e-09	12.1741	NOT
NUDT16L1	-0.109151	8.59803	-6.33658	5.34629e-10	5.89327e-09	12.1737	NOT
CLINT1	0.188966	8.77091	6.33573	5.37378e-10	5.91869e-09	12.1688	UP
CNOT3	-0.119387	7.71844	-6.33537	5.38532e-10	5.92652e-09	12.1667	NOT
ZNF615	0.081464	7.66054	6.33523	5.38978e-10	5.92654e-09	12.1659	NOT
MNAT1	0.0440769	7.00117	6.33399	5.4301e-10	5.96597e-09	12.1586	NOT
GLRX	0.272205	9.8932	6.33041	5.5478e-10	6.08898e-09	12.1378	UP
RHOF	-0.0872229	7.58928	-6.33031	5.55118e-10	6.08898e-09	12.1372	NOT
TBC1D9	0.15231	7.48716	6.3287	5.6047e-10	6.14264e-09	12.1279	NOT
HECTD1	0.128142	8.48054	6.32806	5.62626e-10	6.16122e-09	12.1242	NOT
TNPO3	-0.155722	8.41457	-6.3277	5.63844e-10	6.1695e-09	12.1221	NOT
CHCHD1	0.0781964	7.29578	6.32432	5.75357e-10	6.29031e-09	12.1025	NOT
RP2	0.165988	7.7121	6.32069	5.88012e-10	6.42342e-09	12.0814	NOT
NFE2L2	0.169305	8.76422	6.32031	5.89333e-10	6.43259e-09	12.0792	NOT
GNAS	-0.116786	10.0904	-6.31789	5.97918e-10	6.52097e-09	12.0652	NOT
SLC4A7	0.0813687	7.2262	6.31745	5.99498e-10	6.53287e-09	12.0626	NOT
ARHGAP1	-0.159234	9.91002	-6.31587	6.05183e-10	6.58945e-09	12.0535	NOT
CALR	-0.141534	8.93552	-6.3153	6.07279e-10	6.60688e-09	12.0501	NOT
RRM2B	0.117022	7.37531	6.30968	6.27997e-10	6.82672e-09	12.0176	NOT
GOLGA4	0.0570046	7.12034	6.30782	6.35021e-10	6.89746e-09	12.0068	NOT
STAMBPL1	0.172585	7.94086	6.30697	6.38235e-10	6.92674e-09	12.0019	NOT
KRIT1	0.0952254	7.36935	6.30681	6.38862e-10	6.92792e-09	12.001	NOT
PFKL	-0.12936	8.31548	-6.30589	6.42374e-10	6.96036e-09	11.9956	NOT
COQ5	0.154009	8.3392	6.30418	6.4896e-10	7.02602e-09	11.9857	NOT
SDHD	0.188135	8.57386	6.30392	6.49969e-10	7.0312e-09	11.9842	UP
EMG1	0.131829	7.95433	6.30379	6.50491e-10	7.0312e-09	11.9835	NOT
CUL4B	0.0709715	7.205	6.30264	6.54965e-10	7.07383e-09	11.9768	NOT
PPP1R10	-0.106892	8.03652	-6.30201	6.57414e-10	7.09455e-09	11.9732	NOT
HDAC2	0.105594	7.71	6.29843	6.71612e-10	7.24191e-09	11.9525	NOT
ELMOD2	0.0852137	7.25265	6.29804	6.73179e-10	7.25296e-09	11.9502	NOT
ISOC1	0.122834	7.57371	6.29572	6.82549e-10	7.34799e-09	11.9368	NOT
TM9SF3	0.105648	7.78771	6.29472	6.86637e-10	7.38301e-09	11.931	NOT
MAP3K3	-0.151263	8.38829	-6.29466	6.86907e-10	7.38301e-09	11.9306	NOT
SNRPA	-0.0869758	8.11073	-6.29212	6.97377e-10	7.48952e-09	11.916	NOT
SERBP1	0.154206	8.37679	6.28719	7.18157e-10	7.70648e-09	11.8875	NOT
DAPP1	0.111485	7.33404	6.28494	7.27836e-10	7.80408e-09	11.8745	NOT
RNH1	-0.116974	8.08693	-6.28423	7.30945e-10	7.83113e-09	11.8704	NOT
CALM2	0.210987	11.4022	6.28379	7.32832e-10	7.84506e-09	11.8679	UP
XPO6	-0.212067	10.9298	-6.28315	7.35646e-10	7.86888e-09	11.8642	DOWN
C14orf2	0.162265	7.91004	6.28219	7.39866e-10	7.90769e-09	11.8586	NOT
NAPEPLD	0.0704711	7.13835	6.27525	7.71056e-10	8.23445e-09	11.8186	NOT
GNPAT	0.106969	8.12026	6.27338	7.79681e-10	8.31992e-09	11.8078	NOT
RBM34	0.153522	7.70708	6.27216	7.85361e-10	8.37384e-09	11.8007	NOT
SUPT3H	0.047236	7.06705	6.26884	8.00997e-10	8.53375e-09	11.7816	NOT
SETD1A	-0.0961333	8.01414	-6.26866	8.01867e-10	8.53621e-09	11.7806	NOT
ITFG3	-0.126449	8.07158	-6.26726	8.08557e-10	8.60058e-09	11.7725	NOT
EXOC6	0.0829868	7.40872	6.26694	8.10102e-10	8.61016e-09	11.7707	NOT
NLRX1	-0.101903	7.62223	-6.26157	8.36352e-10	8.87776e-09	11.7397	NOT
GAPDH	-0.134839	11.7296	-6.26152	8.36609e-10	8.87776e-09	11.7395	NOT
EIF2C1	-0.0941386	7.84905	-6.26082	8.40094e-10	8.90766e-09	11.7354	NOT
OCIAD1	0.149571	9.39723	6.26064	8.40969e-10	8.90987e-09	11.7344	NOT
ANAPC13	0.170753	9.66729	6.25874	8.50501e-10	9.00371e-09	11.7235	NOT
SSH2	-0.206675	10.8371	-6.25797	8.54395e-10	9.03779e-09	11.7191	DOWN
PRKD2	-0.163053	8.41979	-6.25667	8.61008e-10	9.10053e-09	11.7116	NOT
SAMD1	-0.067404	7.23067	-6.25215	8.84425e-10	9.34065e-09	11.6856	NOT
FGFR1OP	0.0575858	7.11517	6.25076	8.91731e-10	9.41037e-09	11.6776	NOT
SIN3B	-0.0911938	7.7401	-6.2472	9.10758e-10	9.60357e-09	11.6571	NOT
PPA2	0.0940623	7.38166	6.24415	9.27334e-10	9.77065e-09	11.6396	NOT
ECT2	0.0525937	7.04343	6.24397	9.28328e-10	9.77341e-09	11.6386	NOT
UBA3	0.130974	7.86329	6.24161	9.41427e-10	9.90351e-09	11.625	NOT
AHI1	0.0523932	7.04449	6.23921	9.54902e-10	1.00374e-08	11.6112	NOT
CDC42EP4	-0.122322	8.48517	-6.23844	9.59252e-10	1.00752e-08	11.6068	NOT
REXO1	-0.0973476	7.88428	-6.23811	9.61086e-10	1.00865e-08	11.605	NOT
SET	0.15818	9.72515	6.23715	9.66605e-10	1.01365e-08	11.5994	NOT
C15orf29	0.0992174	7.2462	6.23521	9.77754e-10	1.02298e-08	11.5883	NOT
PSMD2	-0.112888	8.53105	-6.2352	9.77798e-10	1.02298e-08	11.5883	NOT
ZNF317	-0.0886542	8.13462	-6.2352	9.77805e-10	1.02298e-08	11.5883	NOT
ZCRB1	0.0585961	7.13605	6.23461	9.81206e-10	1.02574e-08	11.5849	NOT
KBTBD7	0.152822	7.38848	6.23427	9.8323e-10	1.02705e-08	11.5829	NOT
TATDN2	-0.108153	8.38644	-6.23156	9.9909e-10	1.04233e-08	11.5674	NOT
FAM49B	0.210631	8.02129	6.2315	9.99422e-10	1.04233e-08	11.5671	UP
RBAK	0.0414612	7.02156	6.2298	1.00955e-09	1.05207e-08	11.5573	NOT
RPL5	0.342633	10.3287	6.22844	1.01767e-09	1.05963e-08	11.5495	UP
IFI30	-0.193752	10.1699	-6.22832	1.01839e-09	1.05963e-08	11.5488	DOWN
HRSP12	0.0400495	6.99684	6.22775	1.02183e-09	1.06238e-08	11.5456	NOT
BCKDHA	-0.139949	8.55601	-6.2255	1.03554e-09	1.0758e-08	11.5326	NOT
LRRC58	0.0870542	7.35251	6.22478	1.03996e-09	1.07955e-08	11.5285	NOT
XRCC1	-0.0875371	7.88546	-6.22239	1.05471e-09	1.09401e-08	11.5149	NOT
PPP1CB	0.142395	7.98439	6.22167	1.05922e-09	1.09784e-08	11.5107	NOT
TRAPPC6B	0.0927153	7.57717	6.22083	1.0645e-09	1.10246e-08	11.5059	NOT
MGAT4A	0.0835499	7.53049	6.21655	1.09176e-09	1.12982e-08	11.4814	NOT
LSP1	-0.286563	9.36713	-6.21617	1.09418e-09	1.13145e-08	11.4793	DOWN
TAGLN2	-0.246609	10.172	-6.21529	1.09991e-09	1.13595e-08	11.4742	DOWN
INTS8	0.149956	7.5878	6.21523	1.10024e-09	1.13595e-08	11.4739	NOT
USP1	0.0889427	7.18131	6.21485	1.10276e-09	1.13768e-08	11.4717	NOT
TMEM39B	-0.107311	8.34632	-6.21424	1.10669e-09	1.14085e-08	11.4682	NOT
TLE3	-0.174356	7.99428	-6.21333	1.11265e-09	1.14611e-08	11.463	NOT
ZNF672	-0.117363	8.69044	-6.2102	1.13343e-09	1.16661e-08	11.4451	NOT
RPA3	0.170512	8.30562	6.20355	1.17874e-09	1.21231e-08	11.4071	NOT
C5orf24	0.0828673	7.30228	6.20268	1.18475e-09	1.21756e-08	11.4022	NOT
TIMM8A	0.0392333	7.00311	6.20029	1.20154e-09	1.23387e-08	11.3885	NOT
GNL3L	-0.246362	8.83939	-6.19733	1.22272e-09	1.25465e-08	11.3716	DOWN
RRN3	0.115195	7.42537	6.19693	1.22561e-09	1.25665e-08	11.3693	NOT
KPNA5	0.0359396	7.00095	6.19673	1.227e-09	1.25711e-08	11.3682	NOT
PSIP1	0.184959	7.53775	6.19497	1.23977e-09	1.26922e-08	11.3582	UP
STRBP	0.0778267	7.15522	6.19217	1.26042e-09	1.28937e-08	11.3422	NOT
LPPR2	-0.197977	8.77717	-6.19016	1.2754e-09	1.30321e-08	11.3307	DOWN
MKLN1	0.160025	9.09125	6.19009	1.27589e-09	1.30321e-08	11.3304	NOT
UBTD1	-0.146129	7.98851	-6.18898	1.28426e-09	1.31075e-08	11.324	NOT
ATMIN	0.0682849	7.3211	6.18758	1.29491e-09	1.32061e-08	11.316	NOT
MLF2	-0.181819	9.25861	-6.18704	1.29902e-09	1.32379e-08	11.3129	DOWN
MAPK3	-0.194828	9.70545	-6.18597	1.30717e-09	1.33108e-08	11.3069	DOWN
CDC42SE2	0.196824	8.17544	6.18489	1.31553e-09	1.33858e-08	11.3007	UP
RPL26L1	0.118229	7.40796	6.18474	1.31669e-09	1.33874e-08	11.2998	NOT
RERE	-0.170243	9.64811	-6.18205	1.33767e-09	1.35903e-08	11.2845	NOT
ZNF33A	0.081273	7.42885	6.18135	1.34315e-09	1.36356e-08	11.2806	NOT
BBS10	0.0743529	7.17965	6.18042	1.35053e-09	1.37002e-08	11.2753	NOT
PKIA	0.0804842	7.09743	6.17983	1.35522e-09	1.37373e-08	11.2719	NOT
CLECL1	0.117013	7.06794	6.17952	1.35771e-09	1.37521e-08	11.2701	NOT
MS4A7	0.25587	8.86167	6.1793	1.35945e-09	1.37593e-08	11.2689	UP
CCBL2	0.111397	7.57572	6.17872	1.3641e-09	1.37959e-08	11.2656	NOT
PAK4	-0.0688467	7.43788	-6.17853	1.3656e-09	1.38006e-08	11.2645	NOT
TFRC	0.153141	8.28848	6.17761	1.37299e-09	1.38648e-08	11.2593	NOT
MFSD1	0.182856	9.22686	6.17685	1.37912e-09	1.39162e-08	11.255	UP
C20orf20	0.115691	8.19042	6.17664	1.38082e-09	1.39228e-08	11.2538	NOT
EML3	-0.149944	9.68318	-6.17603	1.38579e-09	1.39624e-08	11.2503	NOT
ZNF692	-0.0912395	7.85902	-6.17456	1.3978e-09	1.40728e-08	11.2419	NOT
MBNL2	0.0908164	7.1638	6.17289	1.41157e-09	1.42007e-08	11.2324	NOT
SC4MOL	0.0815081	7.28084	6.17263	1.41377e-09	1.42122e-08	11.2309	NOT
CCDC109B	0.191825	9.70486	6.17127	1.42506e-09	1.43149e-08	11.2232	UP
C2orf49	0.0779832	7.28929	6.17055	1.43114e-09	1.43652e-08	11.2191	NOT
CTAGE5	-0.131646	7.96434	-6.16953	1.43968e-09	1.44401e-08	11.2133	NOT
MORF4L1	0.221623	9.40235	6.16844	1.44893e-09	1.45219e-08	11.2071	UP
E2F3	0.185705	8.46736	6.16682	1.46273e-09	1.46492e-08	11.1979	UP
JAZF1	0.171524	8.13394	6.16615	1.46851e-09	1.46961e-08	11.1941	NOT
FBP1	-0.174221	8.91451	-6.16492	1.47915e-09	1.47915e-08	11.1871	NOT
SORT1	-0.162055	8.37036	-6.16399	1.48727e-09	1.48616e-08	11.1818	NOT
PYCARD	-0.161518	10.1415	-6.16167	1.50756e-09	1.50531e-08	11.1687	NOT
TBC1D2B	-0.102981	9.05438	-6.16054	1.51757e-09	1.51417e-08	11.1623	NOT
PTGS2	0.237853	8.00547	6.15925	1.52916e-09	1.52459e-08	11.1549	UP
ALDOC	-0.165164	8.932	-6.15905	1.53092e-09	1.52521e-08	11.1538	NOT
GPAA1	-0.117077	8.34969	-6.15745	1.54531e-09	1.5384e-08	11.1447	NOT
INTS1	-0.121144	8.054	-6.15453	1.57202e-09	1.56382e-08	11.1281	NOT
ZNF550	0.0510583	7.0762	6.15391	1.57768e-09	1.56829e-08	11.1246	NOT
ZNF76	-0.0673646	7.51846	-6.14703	1.6425e-09	1.63151e-08	11.0856	NOT
FUT4	0.0933389	7.5092	6.14642	1.64836e-09	1.63611e-08	11.0822	NOT
MED15	-0.0773444	7.40411	-6.14453	1.66669e-09	1.65308e-08	11.0715	NOT
LOC728417	-0.191513	8.1541	-6.14188	1.69273e-09	1.67766e-08	11.0564	DOWN
CTSO	0.13812	7.68587	6.14164	1.69506e-09	1.67873e-08	11.0551	NOT
MAGEL2	-0.173217	7.99102	-6.14048	1.70658e-09	1.6884e-08	11.0486	NOT
NDUFS7	-0.146973	9.84572	-6.14041	1.70736e-09	1.6884e-08	11.0481	NOT
NUCB1	-0.175648	12.2756	-6.13613	1.75056e-09	1.72985e-08	11.0239	NOT
PMAIP1	0.0818594	7.03918	6.13568	1.7551e-09	1.73305e-08	11.0214	NOT
KTELC1	0.10441	7.65189	6.13516	1.76048e-09	1.73603e-08	11.0184	NOT
ACTR2	0.186169	11.1268	6.13503	1.76184e-09	1.73603e-08	11.0177	UP
KLHL5	0.120519	8.34228	6.13501	1.76202e-09	1.73603e-08	11.0176	NOT
PPIG	0.0967015	7.166	6.13354	1.77722e-09	1.74972e-08	11.0093	NOT
REC8	-0.135806	8.01715	-6.13097	1.80412e-09	1.77489e-08	10.9947	NOT
USP47	0.0734351	7.19075	6.12901	1.82483e-09	1.79394e-08	10.9837	NOT
KLF9	0.203611	8.18304	6.12863	1.8289e-09	1.79663e-08	10.9815	UP
AGPAT1	-0.136183	8.10816	-6.12809	1.83463e-09	1.80093e-08	10.9785	NOT
MRPL35	0.0621685	7.21571	6.12441	1.87441e-09	1.83863e-08	10.9577	NOT
PRAM1	-0.204932	9.04967	-6.12263	1.89402e-09	1.85651e-08	10.9476	DOWN
SNAPC2	-0.110769	8.14193	-6.12243	1.8962e-09	1.85728e-08	10.9465	NOT
LXN	0.107217	7.64736	6.12197	1.90136e-09	1.86096e-08	10.9439	NOT
MED16	-0.18972	8.74994	-6.1205	1.91767e-09	1.87555e-08	10.9356	DOWN
TTC14	0.159772	8.16236	6.11842	1.94111e-09	1.89709e-08	10.9238	NOT
PCGF5	0.0642718	7.11099	6.11815	1.94406e-09	1.89859e-08	10.9223	NOT
MYH9	-0.2076	11.9246	-6.11693	1.95793e-09	1.91073e-08	10.9155	DOWN
PPME1	-0.0828734	7.74913	-6.11376	1.99441e-09	1.94355e-08	10.8976	NOT
CARHSP1	-0.175021	9.77664	-6.11376	1.99447e-09	1.94355e-08	10.8976	NOT
NSL1	0.112147	8.23882	6.11306	2.0026e-09	1.95006e-08	10.8936	NOT
GGNBP2	0.126664	8.74119	6.11265	2.00743e-09	1.95247e-08	10.8913	NOT
PJA2	0.285903	10.1426	6.1126	2.00801e-09	1.95247e-08	10.891	UP
ATP7A	0.0850065	7.3265	6.10989	2.03996e-09	1.98068e-08	10.8757	NOT
ARHGEF1	-0.130121	8.50166	-6.10988	2.03998e-09	1.98068e-08	10.8757	NOT
CAND1	0.0969222	7.45437	6.1079	2.06364e-09	2.0022e-08	10.8645	NOT
SLC39A6	0.0539531	7.13069	6.10661	2.07924e-09	2.01587e-08	10.8572	NOT
VAT1	-0.120114	7.99062	-6.1027	2.12705e-09	2.06072e-08	10.8352	NOT
EHD1	-0.174308	11.421	-6.10181	2.13809e-09	2.06992e-08	10.8302	NOT
TOMM70A	0.120131	8.50777	6.10025	2.15752e-09	2.08721e-08	10.8214	NOT
PPP3CB	0.155758	8.93485	6.09974	2.164e-09	2.09197e-08	10.8185	NOT
C4orf34	0.124818	9.35878	6.09919	2.17089e-09	2.09584e-08	10.8155	NOT
PRKAR1A	0.226424	10.8747	6.09917	2.17114e-09	2.09584e-08	10.8154	UP
RPL28	-0.0834269	7.58828	-6.09849	2.17972e-09	2.1026e-08	10.8115	NOT
INTS5	-0.0891817	7.68138	-6.09743	2.19317e-09	2.11405e-08	10.8056	NOT
ACD	-0.108349	8.05247	-6.09617	2.20937e-09	2.12807e-08	10.7984	NOT
C7orf54	-0.146756	8.53021	-6.09605	2.21089e-09	2.12807e-08	10.7978	NOT
PHF15	-0.15925	9.07582	-6.09523	2.22138e-09	2.13662e-08	10.7932	NOT
MBOAT7	-0.237896	10.5955	-6.09506	2.22365e-09	2.13727e-08	10.7922	DOWN
WWC3	-0.139935	8.48053	-6.09452	2.23056e-09	2.14236e-08	10.7892	NOT
PSMB10	-0.141419	12.2818	-6.09389	2.23883e-09	2.14876e-08	10.7856	NOT
PMVK	-0.0811692	7.91542	-6.09153	2.26964e-09	2.17534e-08	10.7724	NOT
PTPDC1	0.0319744	7.01524	6.09152	2.26977e-09	2.17534e-08	10.7723	NOT
YIPF4	0.158153	8.14514	6.08982	2.29234e-09	2.19539e-08	10.7628	NOT
CCT2	0.160624	8.47386	6.08591	2.34492e-09	2.24414e-08	10.7408	NOT
ADAR	-0.159038	9.9457	-6.08522	2.35425e-09	2.25145e-08	10.7369	NOT
TCF12	0.0972043	7.4609	6.08348	2.37814e-09	2.27267e-08	10.7272	NOT
NOL11	0.146563	8.22683	6.08327	2.38111e-09	2.27388e-08	10.726	NOT
ZNF302	0.170059	7.53691	6.08277	2.38795e-09	2.27879e-08	10.7232	NOT
GHDC	-0.110324	8.23833	-6.08239	2.39328e-09	2.28224e-08	10.721	NOT
STAT3	-0.203535	9.23182	-6.08227	2.39501e-09	2.28226e-08	10.7203	DOWN
TOR1AIP1	0.187108	9.46714	6.0809	2.414e-09	2.29872e-08	10.7127	UP
ANKRD57	0.0865834	7.24962	6.07784	2.45727e-09	2.33826e-08	10.6955	NOT
PRPF8	-0.190114	9.93372	-6.07655	2.47567e-09	2.35409e-08	10.6883	DOWN
KIAA0391	0.121362	8.14734	6.07471	2.50223e-09	2.37755e-08	10.6779	NOT
TRIM2	0.0313526	6.95838	6.07459	2.5039e-09	2.37755e-08	10.6773	NOT
THAP1	0.0898552	7.45696	6.07428	2.50845e-09	2.38018e-08	10.6755	NOT
ARHGAP30	-0.150395	9.73818	-6.07328	2.52308e-09	2.39236e-08	10.6699	NOT
FAM102B	0.0820457	7.3801	6.07227	2.53776e-09	2.40292e-08	10.6643	NOT
SLC10A3	-0.115498	8.24345	-6.07225	2.53805e-09	2.40292e-08	10.6642	NOT
CUEDC2	-0.0986608	8.9679	-6.07215	2.53961e-09	2.40292e-08	10.6636	NOT
DLAT	0.0723698	7.25812	6.06801	2.60121e-09	2.45946e-08	10.6404	NOT
USPL1	0.107286	7.70514	6.06631	2.62696e-09	2.48205e-08	10.6308	NOT
C15orf39	-0.234446	10.049	-6.06558	2.6381e-09	2.49081e-08	10.6267	DOWN
ZFAND3	-0.125428	8.35638	-6.06315	2.67541e-09	2.52425e-08	10.6131	NOT
PPIL1	0.0839478	7.26162	6.06208	2.69197e-09	2.53809e-08	10.6072	NOT
LAMP1	-0.169316	10.9027	-6.05946	2.73309e-09	2.57504e-08	10.5925	NOT
GPSM3	-0.159791	11.732	-6.05648	2.78058e-09	2.61793e-08	10.5758	NOT
SMARCB1	-0.118159	8.05284	-6.05491	2.80597e-09	2.63998e-08	10.567	NOT
SF3B3	-0.126062	8.17237	-6.05271	2.84179e-09	2.6718e-08	10.5547	NOT
RXRA	-0.181899	11.2903	-6.05156	2.86077e-09	2.68776e-08	10.5483	DOWN
CLN3	-0.099036	8.10271	-6.05135	2.86417e-09	2.68906e-08	10.5471	NOT
NDRG3	-0.107441	8.77001	-6.04782	2.92308e-09	2.74244e-08	10.5274	NOT
RSRC1	0.0776863	7.21841	6.04311	3.00368e-09	2.81608e-08	10.5011	NOT
CES2	-0.0931837	8.54917	-6.04289	3.00758e-09	2.81776e-08	10.4998	NOT
RCHY1	0.0402177	7.04392	6.0412	3.03701e-09	2.84333e-08	10.4904	NOT
NCOR2	-0.08545	7.61492	-6.04084	3.04326e-09	2.8472e-08	10.4884	NOT
SLC9A6	0.0915587	7.61434	6.03912	3.07369e-09	2.87365e-08	10.4788	NOT
GOLPH3	0.140942	8.6159	6.03897	3.0762e-09	2.87399e-08	10.478	NOT
PLEKHF2	0.0524707	7.08948	6.03747	3.10302e-09	2.89702e-08	10.4696	NOT
SF3A2	-0.176369	9.74732	-6.03367	3.17176e-09	2.95913e-08	10.4484	NOT
ATP13A2	-0.0677599	7.4363	-6.03322	3.17998e-09	2.96473e-08	10.4459	NOT
MTM1	0.0962169	7.53896	6.03296	3.1847e-09	2.96706e-08	10.4444	NOT
CCDC58	0.0693608	7.06305	6.03072	3.22598e-09	3.00342e-08	10.432	NOT
RAB1B	-0.10956	7.97997	-6.02913	3.25575e-09	3.02902e-08	10.4231	NOT
IFIT5	0.110067	7.34292	6.02551	3.32431e-09	3.09066e-08	10.4029	NOT
RGS1	0.0500989	7.04475	6.02509	3.33237e-09	3.096e-08	10.4006	NOT
CYB5R4	0.180449	8.72263	6.02427	3.34799e-09	3.10835e-08	10.396	UP
RPL10A	0.377077	10.037	6.02395	3.35432e-09	3.11206e-08	10.3942	UP
MAP2K2	-0.16352	9.29547	-6.01939	3.44334e-09	3.19244e-08	10.3689	NOT
ABHD4	-0.102367	7.69524	-6.01842	3.46259e-09	3.20805e-08	10.3635	NOT
OXA1L	-0.111793	9.44841	-6.01603	3.51048e-09	3.25017e-08	10.3502	NOT
XRCC6	-0.165515	9.26308	-6.01451	3.54124e-09	3.27638e-08	10.3417	NOT
ZNF23	0.074309	7.1299	6.01359	3.56014e-09	3.29159e-08	10.3366	NOT
NRK	-0.0912757	7.45279	-6.01247	3.5831e-09	3.31053e-08	10.3304	NOT
OXCT1	0.0612722	7.18336	6.01063	3.62109e-09	3.34332e-08	10.3201	NOT
TRIM11	-0.0910211	8.05503	-6.00867	3.66211e-09	3.37885e-08	10.3092	NOT
KATNA1	0.0904866	7.97962	6.00806	3.67497e-09	3.38838e-08	10.3059	NOT
ZCCHC9	0.116255	8.17101	6.00645	3.70919e-09	3.41757e-08	10.2969	NOT
SLC15A3	-0.198717	10.4911	-6.00461	3.74836e-09	3.44996e-08	10.2867	DOWN
ORAI1	-0.122156	8.48071	-6.00456	3.74951e-09	3.44996e-08	10.2864	NOT
CCNI	-0.147008	12.9974	-6.00184	3.80855e-09	3.50187e-08	10.2713	NOT
IPO7	0.0344985	7.01318	6.00106	3.82558e-09	3.51511e-08	10.267	NOT
MOV10	-0.125287	7.94423	-6.00032	3.84197e-09	3.52774e-08	10.2629	NOT
NKIRAS2	-0.0710328	7.49644	-5.99946	3.86088e-09	3.54268e-08	10.2581	NOT
PUM2	0.134055	9.18702	5.99889	3.87354e-09	3.55185e-08	10.2549	NOT
NUCB2	0.106034	7.41531	5.99779	3.898e-09	3.57183e-08	10.2488	NOT
DYRK1B	-0.0943428	7.53335	-5.99763	3.90159e-09	3.57267e-08	10.2479	NOT
VPS8	-0.129047	8.85536	-5.99538	3.95229e-09	3.61662e-08	10.2355	NOT
ITPK1	-0.208967	9.14318	-5.99202	4.02902e-09	3.6843e-08	10.2169	DOWN
C17orf61	0.181739	9.15179	5.99179	4.03444e-09	3.68674e-08	10.2155	UP
BBC3	-0.107781	7.77924	-5.99156	4.03958e-09	3.68891e-08	10.2143	NOT
TBC1D10B	-0.253141	9.15522	-5.99083	4.0567e-09	3.70201e-08	10.2102	DOWN
DSE	0.104912	7.5639	5.98572	4.17705e-09	3.80924e-08	10.1819	NOT
ZNF443	0.0773026	7.16921	5.98305	4.24126e-09	3.86271e-08	10.1672	NOT
COMMD6	0.333623	8.11697	5.98305	4.24146e-09	3.86271e-08	10.1671	UP
SEC14L1	-0.234425	8.92845	-5.98126	4.28495e-09	3.89965e-08	10.1573	DOWN
RAB4B	-0.100504	8.38238	-5.98038	4.30674e-09	3.91682e-08	10.1524	NOT
SUCLA2	0.0753694	7.21174	5.9784	4.35566e-09	3.95697e-08	10.1414	NOT
C9orf5	0.133048	7.87912	5.97836	4.35681e-09	3.95697e-08	10.1412	NOT
RNPC3	0.118329	7.31292	5.97552	4.42807e-09	4.01895e-08	10.1255	NOT
SLCO3A1	-0.146738	8.75965	-5.97498	4.44173e-09	4.02861e-08	10.1225	NOT
TBC1D3G	-0.0877869	7.66074	-5.97431	4.45867e-09	4.04123e-08	10.1188	NOT
RNF7	0.104343	8.28436	5.97265	4.50123e-09	4.07704e-08	10.1096	NOT
ZFHX3	-0.0994547	7.5399	-5.96976	4.57604e-09	4.142e-08	10.0937	NOT
EIF3B	-0.134159	8.57875	-5.96937	4.58638e-09	4.14854e-08	10.0915	NOT
HDHD2	0.116796	7.94701	5.96893	4.59783e-09	4.15609e-08	10.0891	NOT
RAB8A	-0.128899	10.6336	-5.96772	4.62986e-09	4.18221e-08	10.0824	NOT
PILRA	-0.207613	9.98774	-5.96741	4.63798e-09	4.18672e-08	10.0807	DOWN
PRPF3	-0.100283	9.35635	-5.96668	4.65744e-09	4.20145e-08	10.0766	NOT
PLEKHO2	-0.173586	9.20826	-5.96612	4.67225e-09	4.21196e-08	10.0735	NOT
TAPT1	0.0937518	7.31501	5.96502	4.7018e-09	4.23574e-08	10.0674	NOT
OTUD4	0.0842029	7.60078	5.96291	4.75875e-09	4.28416e-08	10.0558	NOT
PDS5A	0.11366	7.98783	5.96166	4.79265e-09	4.31177e-08	10.0489	NOT
EED	0.05057	7.04088	5.96109	4.80841e-09	4.32304e-08	10.0458	NOT
SKAP2	0.233461	8.83092	5.95811	4.89064e-09	4.39119e-08	10.0294	UP
DCTN4	0.093033	7.35449	5.95811	4.89079e-09	4.39119e-08	10.0293	NOT
EIF2C3	0.0627715	7.2019	5.95632	4.94081e-09	4.43312e-08	10.0195	NOT
SUPT6H	-0.09666	7.64867	-5.95556	4.96246e-09	4.44956e-08	10.0152	NOT
C14orf156	0.255776	8.44273	5.95472	4.98605e-09	4.46771e-08	10.0107	UP
UBA7	-0.13969	9.55767	-5.95384	5.01133e-09	4.485e-08	10.0058	NOT
CD14	-0.224479	11.3789	-5.95381	5.01206e-09	4.485e-08	10.0056	DOWN
ZER1	-0.0853335	7.46784	-5.95264	5.04572e-09	4.5121e-08	9.99915	NOT
TMUB1	-0.109157	8.77736	-5.94942	5.13914e-09	4.59257e-08	9.98141	NOT
RNASEH2B	0.125062	7.4747	5.94675	5.21784e-09	4.65978e-08	9.96671	NOT
NDE1	-0.201937	10.6043	-5.9442	5.29402e-09	4.72466e-08	9.95269	DOWN
AGPS	0.0761144	7.50198	5.94332	5.32049e-09	4.74511e-08	9.94786	NOT
TICAM1	-0.0898149	7.8017	-5.9431	5.32742e-09	4.74812e-08	9.94661	NOT
RABL3	0.0565993	7.199	5.94222	5.35417e-09	4.76878e-08	9.94176	NOT
PPP1CA	-0.174946	10.5269	-5.93574	5.55507e-09	4.94442e-08	9.90613	NOT
FBXO4	0.0551122	7.09369	5.93557	5.56028e-09	4.94576e-08	9.90523	NOT
TTLL12	-0.101654	7.99375	-5.93479	5.58514e-09	4.96426e-08	9.90091	NOT
LMF2	-0.110761	8.48668	-5.93468	5.58851e-09	4.96426e-08	9.90033	NOT
ARL5A	0.208353	10.3685	5.93422	5.60333e-09	4.97412e-08	9.89777	UP
SPOPL	0.133355	7.59177	5.93393	5.61252e-09	4.97897e-08	9.89618	NOT
ITGB2	-0.146415	13.5929	-5.93371	5.61963e-09	4.98196e-08	9.89496	NOT
DSCAM	-0.182165	7.68676	-5.9327	5.65184e-09	5.0072e-08	9.88943	DOWN
TRIM41	-0.092044	8.69389	-5.93136	5.695e-09	5.04209e-08	9.88207	NOT
ZNF256	0.0851415	7.24422	5.92738	5.82513e-09	5.15389e-08	9.86022	NOT
PHF12	-0.0808771	7.78274	-5.92606	5.8691e-09	5.18935e-08	9.85295	NOT
MPP6	0.0469179	7.03682	5.9258	5.87783e-09	5.19363e-08	9.85151	NOT
FERMT3	-0.148427	10.5086	-5.92463	5.91684e-09	5.22465e-08	9.84512	NOT
HSPH1	0.170835	8.26083	5.92416	5.93277e-09	5.23526e-08	9.84251	NOT
SLC4A2	-0.0756044	7.46122	-5.9217	6.01596e-09	5.30517e-08	9.82905	NOT
ZNF823	0.069533	7.18233	5.92107	6.0375e-09	5.32064e-08	9.82559	NOT
CMTM3	-0.181993	8.06691	-5.91968	6.08532e-09	5.35925e-08	9.81796	DOWN
PNRC2	0.169993	8.15176	5.91945	6.09349e-09	5.36112e-08	9.81667	NOT
REV1	0.0985385	7.64848	5.91939	6.09546e-09	5.36112e-08	9.81635	NOT
ZNF226	0.0292598	6.98632	5.91592	6.21664e-09	5.4641e-08	9.79732	NOT
TANK	0.0776585	7.92173	5.91558	6.22857e-09	5.47039e-08	9.79546	NOT
TSSC4	-0.136205	8.93494	-5.91548	6.23199e-09	5.47039e-08	9.79493	NOT
SLC19A1	-0.154155	8.27265	-5.91172	6.3664e-09	5.58461e-08	9.7743	NOT
NT5C3	0.161151	8.2788	5.91161	6.37047e-09	5.58461e-08	9.77368	NOT
WDR46	-0.100786	8.06298	-5.91126	6.383e-09	5.59193e-08	9.77178	NOT
CD97	-0.15937	10.1997	-5.91048	6.41111e-09	5.61002e-08	9.76753	NOT
CCDC99	0.049214	7.05949	5.91046	6.41205e-09	5.61002e-08	9.76739	NOT
SLC38A9	0.0719772	7.25397	5.90952	6.44635e-09	5.63633e-08	9.76223	NOT
ZC3H3	-0.12721	8.81425	-5.90863	6.47864e-09	5.66087e-08	9.7574	NOT
GTF2E2	0.115722	9.16523	5.90814	6.49674e-09	5.67297e-08	9.7547	NOT
TCEAL8	0.111971	7.6559	5.90792	6.50502e-09	5.67649e-08	9.75347	NOT
MNT	-0.124664	8.80218	-5.90489	6.6174e-09	5.77079e-08	9.73691	NOT
STAT5A	-0.148761	9.93221	-5.90346	6.67133e-09	5.81402e-08	9.72906	NOT
ZNF365	0.0603809	7.06449	5.90327	6.67831e-09	5.81631e-08	9.72805	NOT
WDSUB1	0.0894631	7.66692	5.90281	6.69596e-09	5.82788e-08	9.7255	NOT
ZSCAN16	0.0880721	7.75958	5.89922	6.8331e-09	5.94338e-08	9.70589	NOT
PPA1	0.218791	9.28317	5.89909	6.83825e-09	5.94398e-08	9.70516	UP
MGEA5	0.178319	10.747	5.89851	6.86061e-09	5.95954e-08	9.70201	UP
GPX7	0.111862	7.7921	5.89727	6.90913e-09	5.99779e-08	9.69519	NOT
C19orf22	-0.241592	13.1845	-5.89701	6.91897e-09	6.00243e-08	9.69382	DOWN
ZFPM1	-0.123762	8.346	-5.89676	6.92884e-09	6.0071e-08	9.69244	NOT
ABCF1	-0.141499	9.3442	-5.89546	6.9801e-09	6.04761e-08	9.68531	NOT
C6orf130	0.0969776	7.92684	5.89519	6.9907e-09	6.05287e-08	9.68384	NOT
ZYG11B	-0.173487	9.75797	-5.89393	7.04053e-09	6.09206e-08	9.67698	NOT
VIPR1	-0.149677	8.43141	-5.89315	7.07173e-09	6.11511e-08	9.6727	NOT
POLR3GL	0.165404	9.15802	5.8916	7.13407e-09	6.16501e-08	9.66422	NOT
PMPCB	0.12876	8.70735	5.88944	7.22175e-09	6.23676e-08	9.65241	NOT
EIF2A	0.171786	8.08907	5.88658	7.33909e-09	6.33399e-08	9.63682	NOT
KBTBD3	0.0498312	7.05327	5.88548	7.385e-09	6.3695e-08	9.6308	NOT
CALCOCO1	-0.100043	8.07545	-5.87975	7.62766e-09	6.57455e-08	9.59954	NOT
SMNDC1	0.165142	7.86251	5.87922	7.65054e-09	6.59002e-08	9.59664	NOT
SAFB2	-0.11685	9.32245	-5.87508	7.83105e-09	6.74116e-08	9.5741	NOT
YPEL3	-0.206548	11.5871	-5.87422	7.8693e-09	6.76972e-08	9.56939	DOWN
WDR36	0.117795	7.7134	5.8738	7.88798e-09	6.78143e-08	9.5671	NOT
SLC35A3	0.0760845	7.43097	5.87237	7.95147e-09	6.83162e-08	9.55935	NOT
NCOA7	0.135684	8.29217	5.87018	8.05058e-09	6.91232e-08	9.54737	NOT
TXNL1	0.10555	7.26902	5.86995	8.06066e-09	6.91653e-08	9.54617	NOT
IL2RG	-0.105227	7.74241	-5.86922	8.09392e-09	6.94061e-08	9.54218	NOT
ATP2C1	0.0476773	7.08339	5.86888	8.10941e-09	6.94943e-08	9.54034	NOT
CFL1	-0.145593	12.1222	-5.86756	8.17019e-09	6.99703e-08	9.53312	NOT
CSF3R	-0.245562	9.91518	-5.86635	8.22595e-09	7.04027e-08	9.52654	DOWN
MRPS36	0.0488286	7.12897	5.86531	8.27408e-09	7.07693e-08	9.52091	NOT
ANKRD34B	0.030965	6.95662	5.86265	8.39924e-09	7.17939e-08	9.50639	NOT
NRGN	-0.368183	10.6149	-5.86192	8.43374e-09	7.20427e-08	9.50243	DOWN
WRB	0.0898389	7.34713	5.86021	8.51502e-09	7.26906e-08	9.49316	NOT
MUC6	-0.210512	8.33216	-5.85932	8.55781e-09	7.30091e-08	9.48832	DOWN
MYO1G	-0.148078	10.4553	-5.85874	8.58605e-09	7.32034e-08	9.48513	NOT
AP1G2	-0.111766	8.67495	-5.85623	8.70809e-09	7.41964e-08	9.47149	NOT
TBCE	0.0873468	7.73246	5.85588	8.72506e-09	7.42937e-08	9.46961	NOT
GEMIN8	0.041497	7.08848	5.85537	8.75006e-09	7.44591e-08	9.46684	NOT
RPL27A	0.133237	12.8483	5.85238	8.89826e-09	7.5672e-08	9.45061	NOT
MINPP1	0.0446286	7.0702	5.84956	9.0407e-09	7.68344e-08	9.43526	NOT
DPP8	-0.101771	8.42364	-5.84941	9.04821e-09	7.68494e-08	9.43446	NOT
SOCS2	0.0659281	7.21348	5.84903	9.06743e-09	7.69637e-08	9.43241	NOT
NUP160	0.107463	7.93573	5.84834	9.10269e-09	7.72139e-08	9.42866	NOT
OSTM1	0.119855	7.80771	5.84807	9.11661e-09	7.72829e-08	9.42718	NOT
GZMA	0.337081	9.91907	5.84744	9.14891e-09	7.75075e-08	9.42376	UP
TBC1D10C	-0.119975	10.9608	-5.845	9.27494e-09	7.85255e-08	9.41054	NOT
SCAND1	-0.113793	9.00482	-5.84483	9.28405e-09	7.85528e-08	9.40959	NOT
ARID5B	0.146181	8.2283	5.84377	9.33925e-09	7.89698e-08	9.40386	NOT
CYB5R3	-0.130449	8.35395	-5.84365	9.34528e-09	7.89709e-08	9.40324	NOT
SYF2	0.0945473	7.56775	5.84178	9.44418e-09	7.97562e-08	9.39306	NOT
DSTN	0.167987	8.34869	5.84076	9.49853e-09	8.01645e-08	9.38752	NOT
JUND	-0.137155	12.8185	-5.84045	9.51483e-09	8.02513e-08	9.38586	NOT
ZNFX1	-0.18205	9.53372	-5.83921	9.58116e-09	8.07598e-08	9.37915	DOWN
ODF2L	0.036969	7.04696	5.83821	9.63539e-09	8.11657e-08	9.37369	NOT
NSMAF	0.148827	9.02708	5.83781	9.65687e-09	8.12954e-08	9.37154	NOT
ANKRD37	0.0532352	7.16623	5.83634	9.73678e-09	8.19164e-08	9.36358	NOT
IMPDH1	-0.159543	9.16271	-5.83526	9.79562e-09	8.23596e-08	9.35775	NOT
TSC22D4	-0.15094	8.59961	-5.83373	9.87999e-09	8.30167e-08	9.34947	NOT
AK3	0.126062	8.32223	5.83194	9.98003e-09	8.38046e-08	9.33973	NOT
ZNF564	0.0777814	7.56357	5.82996	1.0091e-08	8.46834e-08	9.32904	NOT
FKBP1A	-0.169795	10.7957	-5.82886	1.01534e-08	8.51536e-08	9.32309	NOT
BCORL1	-0.0803183	7.42642	-5.8281	1.01971e-08	8.54666e-08	9.31894	NOT
PI4KB	-0.0914069	8.49221	-5.82756	1.02275e-08	8.56675e-08	9.31606	NOT
MED20	0.107138	8.16705	5.82556	1.03428e-08	8.65789e-08	9.30523	NOT
RCBTB1	0.0315525	7.03825	5.82419	1.04223e-08	8.71897e-08	9.29783	NOT
MRPL33	0.165298	9.9023	5.82284	1.05014e-08	8.77968e-08	9.29052	NOT
SPAST	0.127001	7.6143	5.81733	1.08302e-08	9.04887e-08	9.26074	NOT
ERCC2	-0.0698269	7.33907	-5.81498	1.09733e-08	9.16269e-08	9.24805	NOT
ATXN7L3	-0.0968735	8.88793	-5.81462	1.09955e-08	9.17552e-08	9.2461	NOT
CXorf26	0.122298	7.96307	5.81337	1.10728e-08	9.23428e-08	9.23933	NOT
NMT1	-0.0942981	7.87768	-5.81317	1.1085e-08	9.23862e-08	9.23827	NOT
CTSB	-0.233788	9.91381	-5.81284	1.11058e-08	9.25021e-08	9.23646	DOWN
GLCCI1	0.0545506	7.13751	5.81249	1.11272e-08	9.26224e-08	9.2346	NOT
DCTN3	-0.0947827	9.7544	-5.812	1.11577e-08	9.2819e-08	9.23195	NOT
ISCA2	0.0658365	7.28611	5.81052	1.12507e-08	9.3534e-08	9.22393	NOT
TMEM66	0.191551	11.8169	5.80762	1.14342e-08	9.5001e-08	9.2083	UP
COASY	-0.0923037	8.46307	-5.80746	1.14446e-08	9.50261e-08	9.20742	NOT
MTRF1	0.0661775	7.21288	5.80735	1.14515e-08	9.50261e-08	9.20684	NOT
SRP14	0.224734	10.1949	5.80596	1.15407e-08	9.57069e-08	9.19934	UP
DGCR8	-0.100747	8.04575	-5.80529	1.15839e-08	9.60059e-08	9.19573	NOT
C18orf32	0.0926689	7.22301	5.80373	1.16854e-08	9.67869e-08	9.1873	NOT
NINJ2	-0.255593	10.7113	-5.80183	1.181e-08	9.77582e-08	9.17706	DOWN
PURB	0.139863	9.18431	5.80054	1.18951e-08	9.84018e-08	9.17012	NOT
TWF2	-0.113788	9.70232	-5.79891	1.20037e-08	9.92385e-08	9.16134	NOT
ZNF431	0.0682459	7.22798	5.79819	1.20518e-08	9.95743e-08	9.15748	NOT
GPR18	0.13505	7.93023	5.79756	1.20943e-08	9.98636e-08	9.15408	NOT
TMEM9B	0.113422	9.11663	5.79679	1.21467e-08	1.00234e-07	9.14991	NOT
CMAS	0.116256	7.96323	5.79112	1.25362e-08	1.03385e-07	9.11941	NOT
HAT1	0.114026	7.3028	5.78744	1.27963e-08	1.05465e-07	9.09958	NOT
RPE	0.07997	7.2609	5.78727	1.28082e-08	1.05498e-07	9.09868	NOT
NXT2	0.073532	7.10621	5.78618	1.28864e-08	1.06047e-07	9.0928	NOT
MFSD5	-0.104103	8.74635	-5.78612	1.28907e-08	1.06047e-07	9.09247	NOT
EIF4G3	-0.100981	8.25406	-5.78569	1.29218e-08	1.06237e-07	9.09015	NOT
ETV6	-0.11711	8.68002	-5.78516	1.29594e-08	1.0648e-07	9.08734	NOT
UBE4A	0.160661	7.93866	5.78453	1.30051e-08	1.06763e-07	9.08394	NOT
NFKB2	-0.101777	7.83799	-5.78447	1.30097e-08	1.06763e-07	9.0836	NOT
OGT	0.205871	9.61464	5.78418	1.30304e-08	1.06867e-07	9.08207	UP
NCBP2	0.0930321	7.71732	5.78224	1.31722e-08	1.07964e-07	9.07161	NOT
C12orf62	0.103166	7.46933	5.78197	1.31914e-08	1.08054e-07	9.07021	NOT
PHKG2	-0.0812877	7.77184	-5.78159	1.322e-08	1.08223e-07	9.06811	NOT
ATP6V0A1	-0.162353	9.57361	-5.78063	1.32902e-08	1.08731e-07	9.06299	NOT
SLC25A1	-0.104123	8.15347	-5.77813	1.34764e-08	1.10186e-07	9.04956	NOT
TNIP1	-0.180657	9.75221	-5.77735	1.35352e-08	1.106e-07	9.04535	DOWN
MED25	-0.236838	9.47828	-5.77339	1.38361e-08	1.12989e-07	9.02411	DOWN
EEF1A1	0.133121	14.0366	5.76749	1.42974e-08	1.16685e-07	8.99244	NOT
PSME3	-0.096521	8.60293	-5.76508	1.44901e-08	1.18185e-07	8.97951	NOT
HNRPDL	0.14065	8.08755	5.76314	1.46465e-08	1.19389e-07	8.96914	NOT
KIFAP3	0.0894355	7.64174	5.76227	1.47176e-08	1.19894e-07	8.96447	NOT
EIF2C2	-0.19883	8.88231	-5.76154	1.47773e-08	1.20308e-07	8.96055	DOWN
AAMP	-0.0676719	7.79782	-5.76075	1.48424e-08	1.20698e-07	8.95631	NOT
SMC3	0.126702	8.07731	5.76074	1.48434e-08	1.20698e-07	8.95625	NOT
ANAPC4	0.137529	8.34058	5.75884	1.50005e-08	1.21902e-07	8.94608	NOT
SYK	-0.186162	10.3785	-5.75798	1.50721e-08	1.22409e-07	8.94148	DOWN
ARF3	-0.164485	9.10527	-5.75739	1.51218e-08	1.22739e-07	8.9383	NOT
FAM135A	0.0404336	7.02625	5.75716	1.5141e-08	1.2282e-07	8.93707	NOT
G3BP1	0.110788	7.22687	5.75286	1.55057e-08	1.25702e-07	8.91409	NOT
PPP1R14B	-0.100718	8.71756	-5.75253	1.55346e-08	1.25859e-07	8.91229	NOT
RPS10	0.212759	12.576	5.75205	1.55761e-08	1.26119e-07	8.90971	UP
ZNF417	-0.0561295	7.27429	-5.75149	1.56238e-08	1.26429e-07	8.90676	NOT
C7orf26	-0.0989808	9.10773	-5.74824	1.59079e-08	1.2865e-07	8.88936	NOT
PREPL	0.0818558	7.19474	5.74726	1.59942e-08	1.29254e-07	8.88414	NOT
DYNC1H1	-0.118886	8.47453	-5.74718	1.6002e-08	1.29254e-07	8.88367	NOT
C11orf61	0.0459811	7.1356	5.74501	1.6195e-08	1.30734e-07	8.87209	NOT
ATXN2	-0.108156	9.44705	-5.74451	1.62394e-08	1.31014e-07	8.86945	NOT
LYPLAL1	0.109108	7.93183	5.74354	1.63273e-08	1.31643e-07	8.86423	NOT
SESN1	0.131123	7.7615	5.74308	1.63687e-08	1.31897e-07	8.86179	NOT
STYXL1	-0.12802	8.5103	-5.7425	1.64218e-08	1.32246e-07	8.85866	NOT
SOAT1	0.0613612	7.18039	5.74226	1.6443e-08	1.32336e-07	8.85742	NOT
CEBPG	0.119478	8.0278	5.74184	1.64815e-08	1.32566e-07	8.85516	NOT
UGDH	0.0820004	7.33278	5.74161	1.65024e-08	1.32655e-07	8.85393	NOT
FXR1	0.108118	7.94765	5.7413	1.65311e-08	1.32805e-07	8.85226	NOT
ROD1	0.18302	10.7844	5.74009	1.66415e-08	1.33612e-07	8.84583	UP
LOC644634	-0.0998308	8.05338	-5.73785	1.68492e-08	1.35199e-07	8.83385	NOT
RPL6	0.192106	12.3948	5.73593	1.70291e-08	1.3656e-07	8.8236	UP
TTF2	0.082383	7.34226	5.73368	1.72423e-08	1.38187e-07	8.81159	NOT
ATP5D	-0.130727	10.6411	-5.73264	1.73417e-08	1.38838e-07	8.80603	NOT
BAT3	-0.168876	8.17086	-5.73261	1.73444e-08	1.38838e-07	8.80589	NOT
HIF1AN	-0.0760712	7.87158	-5.72493	1.80962e-08	1.4477e-07	8.76492	NOT
CFP	-0.164331	9.13885	-5.72442	1.81466e-08	1.45086e-07	8.76224	NOT
KCTD2	-0.0924178	7.8848	-5.72314	1.82759e-08	1.46032e-07	8.75538	NOT
DOCK2	-0.152332	10.8646	-5.72182	1.84093e-08	1.4701e-07	8.74836	NOT
C14orf28	0.0921143	7.42721	5.72147	1.8445e-08	1.47207e-07	8.74649	NOT
LASP1	-0.143644	12.1018	-5.71952	1.86437e-08	1.48704e-07	8.73614	NOT
POLR3A	-0.085299	7.93393	-5.71884	1.87142e-08	1.49178e-07	8.7325	NOT
GNB2	-0.132327	8.36424	-5.71449	1.91686e-08	1.52709e-07	8.70934	NOT
ZNF701	0.071662	7.2322	5.71413	1.92058e-08	1.52914e-07	8.70747	NOT
ICAM3	-0.153272	12.9355	-5.71379	1.92419e-08	1.5311e-07	8.70566	NOT
PWWP2A	0.0610399	7.32514	5.71266	1.93621e-08	1.53975e-07	8.69964	NOT
SNORA32	0.0765722	7.15562	5.71054	1.959e-08	1.55695e-07	8.68835	NOT
PRKRA	0.11408	7.71707	5.7088	1.97785e-08	1.57031e-07	8.67911	NOT
AKAP8L	-0.101475	7.75458	-5.70877	1.97817e-08	1.57031e-07	8.67895	NOT
ANKRD50	0.068708	7.2163	5.7084	1.98225e-08	1.57262e-07	8.67696	NOT
DPRXP4	-0.0943596	7.4286	-5.70734	1.99378e-08	1.58082e-07	8.67136	NOT
RBCK1	-0.157193	9.04773	-5.70709	1.99655e-08	1.58131e-07	8.67002	NOT
GRK6	-0.120928	8.54198	-5.70707	1.99676e-08	1.58131e-07	8.66992	NOT
STRAP	0.139682	8.74855	5.70511	2.01843e-08	1.59752e-07	8.6595	NOT
TIRAP	-0.073042	7.39909	-5.7045	2.02526e-08	1.60198e-07	8.65624	NOT
ALOX5	-0.0995126	8.39141	-5.70351	2.03624e-08	1.60972e-07	8.65102	NOT
KIT	0.0357756	7.03125	5.70199	2.05336e-08	1.62229e-07	8.64294	NOT
CDC7	0.0618476	7.17235	5.70057	2.0695e-08	1.63407e-07	8.63538	NOT
MADD	-0.0656008	7.65819	-5.69986	2.07754e-08	1.63946e-07	8.63164	NOT
PSMB1	0.163221	10.763	5.6992	2.08514e-08	1.64448e-07	8.62812	NOT
KATNB1	-0.09484	8.36939	-5.69832	2.09523e-08	1.65146e-07	8.62346	NOT
FES	-0.188123	9.55043	-5.69736	2.10638e-08	1.65927e-07	8.61833	DOWN
UQCRB	0.0753588	7.04478	5.69715	2.10882e-08	1.66021e-07	8.61722	NOT
SMCHD1	0.128488	7.79147	5.6968	2.11288e-08	1.66221e-07	8.61536	NOT
RFX1	-0.12949	8.23122	-5.69671	2.11385e-08	1.66221e-07	8.61492	NOT
CABIN1	-0.150082	8.80954	-5.69659	2.11528e-08	1.66236e-07	8.61426	NOT
RABEP1	0.153804	8.24749	5.69549	2.1281e-08	1.67146e-07	8.60843	NOT
EFCAB7	0.0300139	7.01779	5.69405	2.14499e-08	1.68373e-07	8.6008	NOT
MED4	0.144362	8.03712	5.69375	2.14855e-08	1.68554e-07	8.5992	NOT
TBC1D17	-0.0957723	7.488	-5.69094	2.18195e-08	1.71073e-07	8.58432	NOT
SMC2	0.0538263	7.07968	5.69071	2.18469e-08	1.71122e-07	8.58311	NOT
RIN2	0.11903	7.54838	5.69068	2.18514e-08	1.71122e-07	8.58291	NOT
ZNF439	0.0963896	7.31603	5.69048	2.18753e-08	1.71209e-07	8.58185	NOT
ZNF184	0.0425023	7.03508	5.69034	2.18917e-08	1.71237e-07	8.58113	NOT
TFEB	-0.0735712	7.42155	-5.68934	2.20122e-08	1.72079e-07	8.57583	NOT
HECW2	0.082221	7.18659	5.68755	2.22293e-08	1.73675e-07	8.56636	NOT
CRNKL1	0.0637931	7.19963	5.68689	2.23098e-08	1.74201e-07	8.56287	NOT
CHORDC1	0.0755385	7.24211	5.68554	2.24759e-08	1.75396e-07	8.55571	NOT
PLDN	0.201335	8.92506	5.68423	2.26382e-08	1.76559e-07	8.54877	UP
ZNF514	0.0655606	7.18331	5.68296	2.27971e-08	1.77695e-07	8.54202	NOT
AP1M1	-0.141394	9.68104	-5.68261	2.28405e-08	1.77929e-07	8.54018	NOT
ZNF341	-0.0849031	7.72992	-5.68171	2.29534e-08	1.78705e-07	8.53542	NOT
LAPTM5	-0.131371	11.5673	-5.68021	2.31437e-08	1.80082e-07	8.52745	NOT
DIS3L2	-0.0809003	7.46142	-5.67867	2.33398e-08	1.81501e-07	8.51931	NOT
ARCN1	-0.137132	9.8817	-5.67659	2.36073e-08	1.83475e-07	8.50831	NOT
TMED2	0.155583	9.06371	5.67601	2.36816e-08	1.83945e-07	8.50528	NOT
RSBN1L	0.127828	8.06753	5.67572	2.37195e-08	1.84133e-07	8.50374	NOT
TMEM165	0.125932	7.40772	5.67387	2.3962e-08	1.85907e-07	8.49392	NOT
WRN	0.0627233	7.28833	5.67131	2.43e-08	1.8842e-07	8.48041	NOT
THNSL1	0.0593986	7.1734	5.66878	2.46382e-08	1.90932e-07	8.46707	NOT
ARFGEF1	0.104556	8.45335	5.66727	2.48434e-08	1.9241e-07	8.45907	NOT
IKBKB	-0.086864	8.52897	-5.66704	2.48746e-08	1.92541e-07	8.45786	NOT
TOM1	-0.0771663	7.34381	-5.66546	2.50911e-08	1.94104e-07	8.4495	NOT
TAX1BP3	-0.131683	8.80938	-5.6652	2.51268e-08	1.94267e-07	8.44813	NOT
PLOD1	-0.176158	9.53582	-5.66243	2.55105e-08	1.9712e-07	8.4335	NOT
SRP68	-0.0980356	8.63707	-5.66188	2.55875e-08	1.97601e-07	8.43059	NOT
EPHB6	-0.0921466	7.54766	-5.66015	2.58301e-08	1.99359e-07	8.42149	NOT
ENO3	-0.0612187	7.31055	-5.65953	2.59175e-08	1.99918e-07	8.41823	NOT
UBQLN2	0.193113	8.91953	5.65819	2.61089e-08	2.01261e-07	8.41113	UP
RASGRP3	0.119203	7.38918	5.6581	2.61218e-08	2.01261e-07	8.41065	NOT
VAV1	-0.129089	8.40292	-5.65759	2.61947e-08	2.01707e-07	8.40796	NOT
GDI1	-0.116611	8.66609	-5.65658	2.63395e-08	2.02705e-07	8.40264	NOT
GPR34	0.0419825	7.007	5.65529	2.65257e-08	2.0402e-07	8.39585	NOT
FAM127B	-0.0657864	7.64386	-5.65425	2.66766e-08	2.05063e-07	8.39038	NOT
C6orf162	0.034376	7.02191	5.65361	2.67696e-08	2.05659e-07	8.38702	NOT
RASGRP4	-0.04785	7.08936	-5.65328	2.68182e-08	2.05915e-07	8.38527	NOT
JDP2	-0.0927981	7.63675	-5.65199	2.70077e-08	2.0725e-07	8.37848	NOT
TMEM63A	-0.105816	8.04319	-5.65186	2.70274e-08	2.07283e-07	8.37777	NOT
ICOS	0.135921	7.71341	5.64764	2.76575e-08	2.11993e-07	8.35554	NOT
NECAP1	0.134039	8.6126	5.64679	2.77862e-08	2.12857e-07	8.35106	NOT
STK39	0.131994	8.18317	5.6456	2.79669e-08	2.14119e-07	8.34481	NOT
SFRS12	0.0582122	7.0935	5.64415	2.81891e-08	2.15697e-07	8.33717	NOT
VAMP2	-0.144638	9.42635	-5.64293	2.83769e-08	2.17009e-07	8.33077	NOT
HSPE1	0.179024	8.25326	5.64137	2.86197e-08	2.18741e-07	8.32255	UP
ZRANB2	0.095401	7.5116	5.64119	2.86476e-08	2.18829e-07	8.32161	NOT
EXTL2	0.0494659	7.12631	5.64083	2.8704e-08	2.19134e-07	8.31971	NOT
LOC728739	0.0725461	7.71164	5.63975	2.8874e-08	2.20307e-07	8.31401	NOT
TAZ	-0.0868367	7.90006	-5.6395	2.89129e-08	2.20402e-07	8.31272	NOT
C17orf91	0.0914756	7.24152	5.63946	2.89195e-08	2.20402e-07	8.31249	NOT
RBM17	0.12999	8.34153	5.6373	2.92607e-08	2.22875e-07	8.30118	NOT
TOP3A	-0.118663	7.8304	-5.63395	2.98001e-08	2.26854e-07	8.28356	NOT
CLIP4	0.0859048	7.45495	5.63354	2.98668e-08	2.27233e-07	8.2814	NOT
MAP3K12	-0.0601296	7.40487	-5.63084	3.03086e-08	2.30463e-07	8.26724	NOT
SLC25A37	-0.268742	12.2411	-5.62837	3.072e-08	2.33458e-07	8.25424	DOWN
THOC5	-0.130097	8.68144	-5.627	3.09501e-08	2.35056e-07	8.24704	NOT
NCAPH2	-0.0605071	7.53411	-5.62691	3.09654e-08	2.35056e-07	8.24656	NOT
THUMPD2	0.0695823	7.26909	5.62545	3.12122e-08	2.36795e-07	8.2389	NOT
PSENEN	-0.118881	8.01136	-5.62398	3.14616e-08	2.38551e-07	8.23123	NOT
ROBO3	-0.0652082	7.29954	-5.62306	3.16193e-08	2.39611e-07	8.22641	NOT
LTB4R	-0.137104	8.12149	-5.62262	3.1696e-08	2.40056e-07	8.22407	NOT
ACO2	-0.0922543	7.82398	-5.62244	3.17271e-08	2.40155e-07	8.22312	NOT
PPP2CA	0.13216	10.7524	5.62219	3.17695e-08	2.4034e-07	8.22183	NOT
ATG2A	-0.162832	8.49875	-5.61983	3.21805e-08	2.43311e-07	8.20944	NOT
ZFAND6	0.123097	8.04525	5.6166	3.27497e-08	2.47475e-07	8.19253	NOT
CFLAR	-0.206441	11.3619	-5.61444	3.3137e-08	2.5026e-07	8.18119	DOWN
ALG5	0.11245	7.68696	5.61078	3.38014e-08	2.55134e-07	8.16204	NOT
BBS12	0.0310474	7.02852	5.61061	3.38329e-08	2.55227e-07	8.16115	NOT
SLC35C2	-0.108579	8.81221	-5.60876	3.4175e-08	2.57662e-07	8.15144	NOT
PNPLA2	-0.22682	9.22426	-5.60862	3.42e-08	2.57706e-07	8.15074	DOWN
EXOSC1	0.101051	8.52462	5.6071	3.44831e-08	2.59692e-07	8.14279	NOT
NOMO2	-0.0820519	7.74732	-5.60669	3.4561e-08	2.60132e-07	8.14061	NOT
LRWD1	-0.132717	8.34527	-5.6057	3.47457e-08	2.61375e-07	8.13547	NOT
LOC728081	-0.0504788	7.12013	-5.60439	3.49944e-08	2.62977e-07	8.12859	NOT
NUDT22	-0.0769564	8.12421	-5.60429	3.50128e-08	2.62977e-07	8.12809	NOT
C20orf30	0.153064	9.85054	5.60427	3.50176e-08	2.62977e-07	8.12795	NOT
RYBP	-0.241596	9.75989	-5.60217	3.54174e-08	2.65829e-07	8.11701	DOWN
ANKRD10	0.10062	7.67983	5.60014	3.5809e-08	2.68618e-07	8.1064	NOT
CS	-0.120468	10.3631	-5.59974	3.58868e-08	2.69051e-07	8.10431	NOT
COG4	-0.0742903	7.76647	-5.59844	3.6142e-08	2.70812e-07	8.09748	NOT
CADPS	-0.0660761	7.18592	-5.59751	3.63245e-08	2.72026e-07	8.09262	NOT
NME7	0.0563466	7.15329	5.5964	3.65425e-08	2.73505e-07	8.08685	NOT
OCEL1	-0.102126	8.79206	-5.59533	3.6755e-08	2.74942e-07	8.08126	NOT
CPSF1	-0.137635	8.33176	-5.59516	3.67898e-08	2.74949e-07	8.08035	NOT
GMFG	0.202978	10.4503	5.59505	3.68116e-08	2.74949e-07	8.07978	UP
PGBD2	0.0613596	7.1356	5.59502	3.68177e-08	2.74949e-07	8.07962	NOT
FMO4	0.0569485	7.1952	5.59097	3.76328e-08	2.80879e-07	8.0585	NOT
DUSP8	-0.0944143	7.66259	-5.59064	3.77014e-08	2.81096e-07	8.05675	NOT
NUMA1	-0.067636	7.33953	-5.59062	3.77039e-08	2.81096e-07	8.05668	NOT
DBNL	-0.128387	11.1643	-5.58955	3.79243e-08	2.82582e-07	8.05106	NOT
CAPN1	-0.143543	9.42475	-5.58799	3.82457e-08	2.84817e-07	8.04293	NOT
ARRDC5	-0.100132	8.05015	-5.58783	3.82789e-08	2.84906e-07	8.04209	NOT
DDIT3	0.092683	7.5611	5.58515	3.88373e-08	2.88901e-07	8.02813	NOT
DHX33	-0.0724691	7.76468	-5.58498	3.88735e-08	2.8901e-07	8.02723	NOT
RECQL	0.102098	7.57344	5.58455	3.89624e-08	2.89509e-07	8.02503	NOT
H3F3A	-0.0939937	14.0702	-5.5828	3.93338e-08	2.92014e-07	8.01588	NOT
MARK2	-0.142753	7.90104	-5.58276	3.93432e-08	2.92014e-07	8.01565	NOT
POLE4	0.167437	9.66143	5.57973	3.99926e-08	2.96669e-07	7.99986	NOT
SDPR	0.226766	8.59025	5.57757	4.04622e-08	2.99986e-07	7.98861	UP
ZDHHC7	-0.112959	10.2426	-5.57661	4.06725e-08	3.01378e-07	7.98361	NOT
PMS1	0.0376326	6.97397	5.57572	4.08675e-08	3.02655e-07	7.979	NOT
YWHAQ	0.165549	10.5775	5.57518	4.09878e-08	3.03378e-07	7.97617	NOT
PNN	0.149233	8.42701	5.57493	4.10422e-08	3.03613e-07	7.97489	NOT
TBX19	-0.0622311	7.40312	-5.57314	4.14417e-08	3.06398e-07	7.96555	NOT
JRKL	0.0225897	6.98082	5.57021	4.21017e-08	3.11106e-07	7.95032	NOT
ZFAND5	0.209969	10.5497	5.56875	4.2434e-08	3.13388e-07	7.94274	UP
VEZF1	0.132464	9.72335	5.56795	4.26178e-08	3.14571e-07	7.93857	NOT
KLF12	0.0884466	7.31906	5.56757	4.27061e-08	3.15049e-07	7.93658	NOT
RRBP1	-0.0613572	7.26354	-5.56687	4.28667e-08	3.16059e-07	7.93296	NOT
SUPT7L	0.0396335	7.03681	5.5667	4.29068e-08	3.1618e-07	7.93206	NOT
PPP1R11	-0.146753	10.7899	-5.56492	4.33211e-08	3.19058e-07	7.9228	NOT
LSM5	0.185045	8.33154	5.56459	4.3398e-08	3.19447e-07	7.92109	UP
ADNP	0.103389	7.74355	5.56377	4.35898e-08	3.20682e-07	7.91684	NOT
TTC17	-0.114525	8.08236	-5.56367	4.3614e-08	3.20684e-07	7.9163	NOT
ARHGAP4	-0.120706	10.1848	-5.56312	4.37423e-08	3.21451e-07	7.91347	NOT
HMGN1	0.152759	9.41313	5.56042	4.43835e-08	3.25983e-07	7.89944	NOT
AP2A2	-0.0701636	7.53701	-5.55716	4.51711e-08	3.31586e-07	7.88249	NOT
EMP3	-0.107995	12.2317	-5.55621	4.54014e-08	3.33093e-07	7.87759	NOT
CTDP1	-0.0805733	7.74532	-5.55559	4.55528e-08	3.3402e-07	7.87438	NOT
C19orf24	-0.0788214	7.83815	-5.55512	4.56699e-08	3.34696e-07	7.8719	NOT
NDUFAB1	0.195675	8.84507	5.55142	4.65873e-08	3.41231e-07	7.85273	UP
COG6	0.0846255	7.34582	5.55056	4.6804e-08	3.42631e-07	7.84826	NOT
ISG20L2	-0.1426	8.98696	-5.54981	4.69918e-08	3.43817e-07	7.8444	NOT
NKIRAS1	0.0561126	7.20956	5.54888	4.72278e-08	3.45355e-07	7.83957	NOT
HMHA1	-0.149329	9.45364	-5.54766	4.75403e-08	3.4745e-07	7.83322	NOT
KIAA0427	-0.0573905	7.27317	-5.54465	4.83157e-08	3.52924e-07	7.81762	NOT
IFRD1	0.189243	8.19197	5.54295	4.8759e-08	3.55803e-07	7.80882	UP
NFKBIA	-0.184812	11.2701	-5.54293	4.87632e-08	3.55803e-07	7.80874	DOWN
SMG1	0.100334	7.89296	5.54155	4.91267e-08	3.58261e-07	7.80158	NOT
ANPEP	-0.248318	9.79506	-5.53889	4.98348e-08	3.63226e-07	7.78779	DOWN
MIB1	0.0624311	7.13611	5.53867	4.98914e-08	3.6344e-07	7.78669	NOT
NADK	-0.184936	9.55727	-5.53733	5.02541e-08	3.65883e-07	7.77971	DOWN
CBL	-0.137135	8.45213	-5.53416	5.11157e-08	3.71953e-07	7.76333	NOT
C17orf85	0.0723072	7.41325	5.53398	5.11649e-08	3.72108e-07	7.7624	NOT
ATP5J	0.145046	8.35983	5.53308	5.14115e-08	3.73699e-07	7.75777	NOT
WDR61	0.114947	8.40296	5.53084	5.2033e-08	3.7801e-07	7.74619	NOT
GARS	-0.102264	9.19908	-5.53066	5.20846e-08	3.7818e-07	7.74524	NOT
PTPRO	0.0555596	7.09566	5.53054	5.21193e-08	3.78226e-07	7.74459	NOT
NFKBIZ	0.128961	8.60079	5.5288	5.26079e-08	3.81564e-07	7.7356	NOT
PSMD11	-0.0614698	7.38356	-5.52867	5.26433e-08	3.81614e-07	7.73496	NOT
KLHL22	-0.121025	9.0576	-5.5281	5.28054e-08	3.82581e-07	7.73199	NOT
SRRM2	-0.150711	10.4634	-5.52792	5.28558e-08	3.82739e-07	7.73107	NOT
FEM1A	-0.138135	9.10977	-5.52655	5.32447e-08	3.85257e-07	7.72401	NOT
PRDM9	-0.0666021	7.19168	-5.52649	5.32611e-08	3.85257e-07	7.72371	NOT
TKT	-0.156903	12.1394	-5.52475	5.37617e-08	3.88667e-07	7.7147	NOT
FAM109A	-0.0621161	7.3559	-5.52225	5.44863e-08	3.93635e-07	7.7018	NOT
ATHL1	-0.236772	9.63897	-5.52218	5.45078e-08	3.93635e-07	7.70142	DOWN
MED30	0.123742	8.45889	5.52151	5.47032e-08	3.94802e-07	7.69797	NOT
CDYL2	-0.0503421	7.12258	-5.52142	5.47285e-08	3.94802e-07	7.69752	NOT
CDA	-0.267915	10.0675	-5.52094	5.48712e-08	3.95617e-07	7.69502	DOWN
C11orf58	0.0298816	6.98307	5.52062	5.49638e-08	3.95941e-07	7.69339	NOT
CCDC88B	-0.128059	7.96264	-5.52058	5.49755e-08	3.95941e-07	7.69319	NOT
BCKDK	-0.136895	9.70326	-5.52048	5.50049e-08	3.95941e-07	7.69267	NOT
CAB39	0.196814	10.6932	5.51968	5.52416e-08	3.9743e-07	7.68853	UP
SAMD4B	-0.101228	7.66232	-5.51867	5.55408e-08	3.99368e-07	7.68333	NOT
KIAA1949	-0.133266	11.5299	-5.51821	5.56772e-08	4.00133e-07	7.68097	NOT
TIGD2	0.0430202	7.12497	5.51759	5.58644e-08	4.01263e-07	7.67773	NOT
RAC2	-0.108743	13.2225	-5.51561	5.64584e-08	4.05311e-07	7.66754	NOT
DPEP2	-0.15459	10.8548	-5.51536	5.65343e-08	4.05638e-07	7.66625	NOT
SLC5A6	-0.0808468	7.80614	-5.51387	5.69864e-08	4.08663e-07	7.65857	NOT
ZNF383	0.0525053	7.16302	5.51336	5.71431e-08	4.09566e-07	7.65593	NOT
NFKBIB	-0.0699104	7.53874	-5.5127	5.73443e-08	4.10788e-07	7.65254	NOT
NKRF	0.0780981	7.39829	5.51156	5.76964e-08	4.13089e-07	7.64664	NOT
NOL10	-0.238853	8.18422	-5.51123	5.77981e-08	4.13595e-07	7.64495	DOWN
DAB2	-0.11544	7.77554	-5.51057	5.80025e-08	4.14793e-07	7.64154	NOT
SNX17	-0.099644	10.0442	-5.51049	5.80275e-08	4.14793e-07	7.64113	NOT
TBXAS1	-0.149169	10.4142	-5.50873	5.85744e-08	4.18478e-07	7.63209	NOT
MRPL45	0.106027	8.07385	5.50779	5.887e-08	4.20365e-07	7.62724	NOT
INTS3	-0.122947	8.91714	-5.50745	5.89776e-08	4.2077e-07	7.62548	NOT
TBC1D4	0.129173	7.60132	5.50741	5.89897e-08	4.2077e-07	7.62528	NOT
HIF1A	0.121329	7.26098	5.50695	5.91366e-08	4.21593e-07	7.62289	NOT
COMTD1	-0.0745767	7.6603	-5.50583	5.94922e-08	4.23902e-07	7.61711	NOT
UST	0.0477633	7.0711	5.50463	5.98725e-08	4.26384e-07	7.61097	NOT
NPHP3	0.111217	7.74143	5.50253	6.05477e-08	4.30963e-07	7.60017	NOT
MRPS30	0.0946358	8.19395	5.50002	6.13668e-08	4.3656e-07	7.58723	NOT
ADD1	-0.143429	11.5083	-5.49883	6.17576e-08	4.39107e-07	7.58111	NOT
C7orf29	-0.057137	7.22918	-5.49793	6.20541e-08	4.4098e-07	7.5765	NOT
ZNF594	0.0562492	7.10147	5.4944	6.32334e-08	4.49122e-07	7.55836	NOT
ZNF532	0.0505803	7.09454	5.4943	6.32676e-08	4.49126e-07	7.55784	NOT
CBX6	-0.12107	8.82878	-5.49106	6.43714e-08	4.56719e-07	7.54118	NOT
BIVM	0.0571823	7.16542	5.48903	6.50734e-08	4.61455e-07	7.53073	NOT
KIDINS220	0.126396	8.25583	5.48745	6.56224e-08	4.65101e-07	7.52264	NOT
CGGBP1	0.170153	9.19135	5.48435	6.67144e-08	4.7259e-07	7.50674	NOT
SNRPB2	0.134617	8.72349	5.48341	6.70506e-08	4.7472e-07	7.5019	NOT
WBP2	-0.16773	12.7506	-5.48227	6.74576e-08	4.77348e-07	7.49607	NOT
UBE2M	-0.132056	10.2163	-5.48169	6.76657e-08	4.78355e-07	7.49311	NOT
PNPLA6	-0.129102	9.62948	-5.48168	6.76714e-08	4.78355e-07	7.49303	NOT
TRIM21	-0.152247	9.29654	-5.48097	6.79288e-08	4.7992e-07	7.48937	NOT
TBCA	0.194673	9.52353	5.4807	6.80245e-08	4.80342e-07	7.48801	UP
ACADVL	-0.123822	9.52567	-5.47602	6.97404e-08	4.92199e-07	7.46402	NOT
LMO2	0.19778	8.96062	5.47577	6.98328e-08	4.92591e-07	7.46275	UP
IL8	0.150917	7.54313	5.47445	7.03255e-08	4.95804e-07	7.45597	NOT
FOXO4	-0.245798	10.2997	-5.47411	7.04511e-08	4.96428e-07	7.45426	DOWN
RNFT1	0.0786146	7.43254	5.4708	7.17057e-08	5.05002e-07	7.43726	NOT
SMPD1	-0.0740779	7.54268	-5.47001	7.2005e-08	5.06842e-07	7.43325	NOT
TPRG1L	-0.124663	10.4847	-5.46962	7.21552e-08	5.07632e-07	7.43124	NOT
GFI1B	-0.0991758	7.37144	-5.46882	7.24625e-08	5.09526e-07	7.42715	NOT
MRPL51	0.16436	8.77987	5.46793	7.28048e-08	5.11663e-07	7.42261	NOT
ZBTB2	0.0426122	7.06393	5.46587	7.3608e-08	5.17036e-07	7.41204	NOT
C20orf4	-0.0879948	8.45572	-5.46346	7.45554e-08	5.23416e-07	7.39973	NOT
CTCF	-0.113079	8.42939	-5.46329	7.46231e-08	5.23616e-07	7.39885	NOT
ZXDB	0.0437432	7.10873	5.4629	7.47757e-08	5.24411e-07	7.39689	NOT
LOC338799	-0.0973113	7.76265	-5.4607	7.56573e-08	5.30315e-07	7.3856	NOT
RTF1	-0.207619	8.1488	-5.45944	7.61635e-08	5.33584e-07	7.37918	DOWN
STX5	-0.0905382	8.89998	-5.45811	7.67015e-08	5.37072e-07	7.3724	NOT
HIBADH	0.0944809	7.84163	5.45618	7.74913e-08	5.42317e-07	7.36254	NOT
WDFY2	-0.0969622	8.34795	-5.45608	7.75352e-08	5.42341e-07	7.36199	NOT
RABAC1	-0.113573	9.54196	-5.45564	7.77146e-08	5.43049e-07	7.35976	NOT
PTPN4	0.159003	8.35649	5.45563	7.77179e-08	5.43049e-07	7.35972	NOT
KCTD9	0.0643452	7.29333	5.45296	7.88254e-08	5.505e-07	7.3461	NOT
NARS	0.201745	8.85932	5.45139	7.94856e-08	5.54821e-07	7.33807	UP
ZNF213	-0.118247	8.02853	-5.45122	7.95578e-08	5.55035e-07	7.33719	NOT
ABCD3	0.0511281	7.30971	5.45034	7.99296e-08	5.57338e-07	7.33271	NOT
FAM36A	0.0883321	7.70171	5.44857	8.06817e-08	5.62288e-07	7.32369	NOT
GLMN	0.0524273	7.13957	5.44677	8.14558e-08	5.67388e-07	7.31449	NOT
NAGPA	-0.0952912	8.43402	-5.44627	8.16719e-08	5.68597e-07	7.31194	NOT
PTPN2	0.0332444	7.01095	5.44382	8.27387e-08	5.75723e-07	7.29945	NOT
LRRC33	-0.127167	8.81467	-5.44327	8.29786e-08	5.77092e-07	7.29666	NOT
CCDC104	0.0789048	7.25796	5.44064	8.41429e-08	5.84885e-07	7.28325	NOT
LRIG2	0.0515812	7.23976	5.43924	8.47709e-08	5.88944e-07	7.27609	NOT
CFHR2	-0.101806	7.33156	-5.43745	8.55733e-08	5.94209e-07	7.26702	NOT
PANK4	-0.0646014	7.61715	-5.43635	8.60769e-08	5.97396e-07	7.26137	NOT
COPS6	-0.0786516	8.32762	-5.43606	8.62088e-08	5.98001e-07	7.25989	NOT
C22orf25	-0.222254	8.91628	-5.43278	8.7713e-08	6.08119e-07	7.24324	DOWN
HSPA4	0.0699808	7.15452	5.43107	8.85115e-08	6.13337e-07	7.23452	NOT
STAG1	0.0563796	7.27698	5.43037	8.88398e-08	6.15293e-07	7.23095	NOT
WWP1	0.0943696	7.54399	5.42972	8.91455e-08	6.1709e-07	7.22765	NOT
BNIP3	0.105538	7.76975	5.42762	9.01394e-08	6.23647e-07	7.21698	NOT
TRA2A	-0.114293	8.47281	-5.42582	9.09994e-08	6.29271e-07	7.20783	NOT
NFU1	0.0833198	7.69162	5.42568	9.10685e-08	6.29423e-07	7.2071	NOT
CLEC16A	-0.0928851	8.52335	-5.42527	9.12625e-08	6.30438e-07	7.20506	NOT
GRM2	-0.0639466	7.40435	-5.42496	9.14157e-08	6.3117e-07	7.20344	NOT
ZNF626	0.0560498	7.13638	5.42277	9.24752e-08	6.38155e-07	7.19235	NOT
C18orf54	0.0312402	7.05062	5.42047	9.36077e-08	6.45637e-07	7.18063	NOT
FRG1	0.163572	8.09817	5.41845	9.46082e-08	6.52201e-07	7.1704	NOT
FHOD1	-0.0887893	8.18394	-5.41827	9.47012e-08	6.52506e-07	7.16945	NOT
NAT14	-0.0504775	7.24636	-5.41738	9.51455e-08	6.55229e-07	7.16495	NOT
EXOC8	0.0324269	7.014	5.41587	9.59038e-08	6.60111e-07	7.15731	NOT
GTF2B	0.138039	8.24019	5.4143	9.67001e-08	6.65249e-07	7.14935	NOT
PRR14	-0.141449	10.3595	-5.41418	9.67609e-08	6.65324e-07	7.14875	NOT
PRPF19	-0.104887	8.38736	-5.4138	9.69553e-08	6.66243e-07	7.14681	NOT
NDUFS5	0.240088	8.90017	5.41373	9.69943e-08	6.66243e-07	7.14643	UP
DTX2	-0.0787921	7.51939	-5.41231	9.77221e-08	6.70898e-07	7.13923	NOT
THUMPD1	0.0577043	7.14744	5.41088	9.84601e-08	6.75617e-07	7.13199	NOT
ZNF385D	-0.0634225	7.20682	-5.40774	1.00101e-07	6.86524e-07	7.11608	NOT
PXMP4	-0.057784	7.24465	-5.40682	1.00587e-07	6.89501e-07	7.11142	NOT
PITRM1	-0.0845063	7.95749	-5.40659	1.00711e-07	6.89997e-07	7.11024	NOT
SF3B4	-0.135893	10.2101	-5.40548	1.01302e-07	6.93695e-07	7.1046	NOT
NME2	-0.0866102	7.51917	-5.40517	1.01467e-07	6.94465e-07	7.10304	NOT
COQ10B	0.137075	8.98904	5.40486	1.01634e-07	6.95256e-07	7.10145	NOT
DHX16	-0.0851746	9.28702	-5.40403	1.02078e-07	6.97933e-07	7.09726	NOT
HSF2	0.0691045	7.35417	5.40192	1.03215e-07	7.05344e-07	7.0866	NOT
WARS	-0.229589	10.2749	-5.40109	1.03666e-07	7.0807e-07	7.0824	DOWN
PRPF38A	0.0565648	7.37847	5.39699	1.05925e-07	7.23123e-07	7.06166	NOT
ST3GAL2	-0.0889035	7.74693	-5.39327	1.08019e-07	7.37042e-07	7.04283	NOT
GRN	-0.209447	10.3152	-5.39315	1.08089e-07	7.37148e-07	7.0422	DOWN
SACS	0.0465859	7.0023	5.3917	1.08915e-07	7.42397e-07	7.03488	NOT
KIAA1033	0.0696127	7.07408	5.3908	1.09431e-07	7.45358e-07	7.03033	NOT
CLPP	-0.0866214	8.12083	-5.39075	1.0946e-07	7.45358e-07	7.03007	NOT
PRCC	-0.0794934	7.8752	-5.38965	1.10093e-07	7.4916e-07	7.02452	NOT
C9orf102	0.0461987	7.09592	5.38958	1.10131e-07	7.4916e-07	7.02419	NOT
HSPA8	0.150466	11.1107	5.38863	1.10685e-07	7.52543e-07	7.01937	NOT
LSM7	0.152175	8.64079	5.38746	1.11367e-07	7.56797e-07	7.01345	NOT
RNF145	0.125476	8.25517	5.38564	1.12435e-07	7.63665e-07	7.00427	NOT
SQSTM1	-0.156275	11.3511	-5.38443	1.1315e-07	7.68134e-07	6.99817	NOT
C12orf44	-0.0754165	8.25977	-5.38226	1.14447e-07	7.76542e-07	6.9872	NOT
DHRS1	-0.125523	9.06465	-5.38173	1.14767e-07	7.78318e-07	6.98452	NOT
SAR1A	0.139554	8.08923	5.3805	1.15504e-07	7.8292e-07	6.97836	NOT
FAM58A	0.0969394	8.01159	5.3793	1.16236e-07	7.87482e-07	6.97228	NOT
MAP4K2	-0.106831	10.488	-5.37906	1.16383e-07	7.8808e-07	6.97106	NOT
MAPK9	0.0749346	7.82354	5.37894	1.16455e-07	7.88168e-07	6.97047	NOT
PDLIM7	-0.204656	9.06964	-5.37821	1.16904e-07	7.90801e-07	6.96677	DOWN
TUBD1	0.0655582	7.13423	5.37773	1.17197e-07	7.92386e-07	6.96436	NOT
ST6GALNAC6	-0.109036	8.25213	-5.37666	1.17857e-07	7.96442e-07	6.95896	NOT
ZNF124	0.0437101	7.12954	5.37457	1.19153e-07	8.04793e-07	6.94844	NOT
REEP4	-0.0655277	7.43586	-5.37255	1.20423e-07	8.12962e-07	6.93823	NOT
GLO1	0.148963	8.74633	5.37137	1.21168e-07	8.17579e-07	6.9323	NOT
MRPS23	0.0698692	7.41341	5.36778	1.23469e-07	8.32682e-07	6.91421	NOT
GCNT1	0.0471108	7.14032	5.36706	1.2393e-07	8.35374e-07	6.91062	NOT
GPS1	-0.060001	7.28895	-5.36684	1.24078e-07	8.35709e-07	6.90947	NOT
FASLG	0.0756682	7.2229	5.36679	1.24105e-07	8.35709e-07	6.90926	NOT
PRDX4	0.122636	8.22427	5.3635	1.26263e-07	8.4981e-07	6.89268	NOT
TIFA	0.0341757	7.05725	5.35998	1.28609e-07	8.65164e-07	6.87497	NOT
HDDC2	0.158656	8.81396	5.35757	1.30235e-07	8.75664e-07	6.86288	NOT
USP8	0.0730769	7.75986	5.3574	1.30355e-07	8.75771e-07	6.862	NOT
HAND2	-0.0443713	7.04803	-5.35736	1.30382e-07	8.75771e-07	6.8618	NOT
UQCRC2	0.132881	7.90506	5.35589	1.31387e-07	8.82074e-07	6.85442	NOT
ISCA1	0.119561	7.42834	5.35516	1.31887e-07	8.84988e-07	6.85076	NOT
ZNF408	-0.0757632	7.66697	-5.35396	1.32716e-07	8.90106e-07	6.84473	NOT
SEC61A1	-0.112143	9.9688	-5.35263	1.33638e-07	8.95836e-07	6.83808	NOT
APEH	-0.0855213	9.30737	-5.35062	1.35053e-07	9.04869e-07	6.82794	NOT
PRDX1	0.152513	9.81002	5.34906	1.36155e-07	9.11792e-07	6.82013	NOT
GLG1	-0.138109	9.7857	-5.34855	1.3652e-07	9.1378e-07	6.81755	NOT
ZC3H7A	0.0663819	7.73403	5.3463	1.38132e-07	9.2411e-07	6.80626	NOT
VPS26B	-0.060698	7.67866	-5.34426	1.39609e-07	9.33519e-07	6.79604	NOT
[truncated: 11,362 more rows]

## Sheet: Table S10
Table S10. KEGG Pathway Enrichment Analysis Based on Differential Expression Genes Between Subgroup1 (S1) and Subgroup2 (S2) Samples
ID	setSize	enrichmentScore	NES	pvalue	p.adjust	qvalue	rank	leading_edge	core_enrichment
KEGG_ABC_TRANSPORTERS	37	0.985715	2.67686	1e-10	1.78e-09	1e-09	59	tags=92%, list=0%, signal=92%	ABCA1/ABCA10/ABCA13/ABCA2/ABCA3/ABCA5/ABCA6/ABCA7/ABCA8/ABCA9/ABCB1/ABCB10/ABCB4/ABCB6/ABCB7/ABCB8/ABCB9/ABCC1/ABCC10/ABCC11/ABCC2/ABCC3/ABCC4/ABCC5/ABCC6/ABCC9/ABCD1/ABCD2/ABCD3/ABCD4/ABCG1/ABCG4/ABCG5/ABCG8
KEGG_FATTY_ACID_METABOLISM	34	0.943456	2.52808	1e-10	1.78e-09	1e-09	370	tags=71%, list=3%, signal=69%	ACAA1/ACAA2/ACADM/ACADS/ACADSB/ACADVL/ACAT1/ACAT2/ACOX1/ACOX3/ACSL1/ACSL3/ACSL4/ACSL5/ACSL6/ADH1A/ADH4/ADH5/ADH6/ALDH1B1/ALDH2/ALDH3A2/ALDH7A1/ALDH9A1
KEGG_PYRUVATE_METABOLISM	35	0.925082	2.48865	1e-10	1.78e-09	1e-09	370	tags=40%, list=3%, signal=39%	ACACA/ACACB/ACAT1/ACAT2/ACSS1/ACSS2/ACYP1/ACYP2/AKR1B1/ALDH1B1/ALDH2/ALDH3A2/ALDH7A1/ALDH9A1
KEGG_PEROXISOME	64	0.821946	2.44897	1e-10	1.78e-09	1e-09	417	tags=27%, list=3%, signal=26%	ABCD1/ABCD2/ABCD3/ABCD4/ACAA1/ACOT8/ACOX1/ACOX2/ACOX3/ACSL1/ACSL3/ACSL4/ACSL5/ACSL6/AGPS/AGXT/AMACR
KEGG_VALINE_LEUCINE_AND_ISOLEUCINE_DEGRADATION	42	0.882934	2.44428	1e-10	1.78e-09	1e-09	1014	tags=48%, list=8%, signal=44%	ABAT/ACAA1/ACAA2/ACAD8/ACADM/ACADS/ACADSB/ACAT1/ACAT2/ALDH1B1/ALDH2/ALDH3A2/ALDH6A1/ALDH7A1/ALDH9A1/AUH/BCAT1/BCAT2/BCKDHA/BCKDHB
KEGG_RIBOSOME	84	-0.730148	-2.43729	1e-10	1.78e-09	1e-09	3560	tags=98%, list=27%, signal=72%	RPL10A/RPL10L/RPL11/RPL12/RPL13/RPL13A/RPL14/RPL15/RPL17/RPL18/RPL18A/RPL19/RPL21/RPL22/RPL22L1/RPL23/RPL23A/RPL24/RPL26/RPL26L1/RPL27/RPL27A/RPL28/RPL29/RPL3/RPL30/RPL31/RPL32/RPL34/RPL35/RPL35A/RPL36/RPL36A/RPL36AL/RPL37/RPL37A/RPL38/RPL39/RPL3L/RPL4/RPL41/RPL5/RPL6/RPL7/RPL7A/RPL8/RPL9/RPLP0/RPLP1/RPLP2/RPS10/RPS11/RPS12/RPS13/RPS15/RPS15A/RPS16/RPS17/RPS18/RPS19/RPS2/RPS20/RPS21/RPS23/RPS24/R…
KEGG_GLYCOLYSIS_GLUCONEOGENESIS	51	0.839479	2.42378	1e-10	1.78e-09	1e-09	373	tags=33%, list=3%, signal=33%	ACSS1/ACSS2/ADH1A/ADH4/ADH5/ADH6/AKR1A1/ALDH1A3/ALDH1B1/ALDH2/ALDH3A2/ALDH3B1/ALDH7A1/ALDH9A1/ALDOA/ALDOB/ALDOC
KEGG_PROPANOATE_METABOLISM	30	0.912146	2.39368	1e-10	1.78e-09	1e-09	370	tags=50%, list=3%, signal=49%	ABAT/ACACA/ACACB/ACADM/ACAT1/ACAT2/ACSS1/ACSS2/ACSS3/ALDH1B1/ALDH2/ALDH3A2/ALDH6A1/ALDH7A1/ALDH9A1
KEGG_BUTANOATE_METABOLISM	28	0.909759	2.37432	1e-10	1.78e-09	1e-09	370	tags=46%, list=3%, signal=45%	AACS/ABAT/ACADS/ACAT1/ACAT2/ACSM3/ACSM5/ALDH1B1/ALDH2/ALDH3A2/ALDH5A1/ALDH7A1/ALDH9A1
KEGG_LYSOSOME	111	0.717571	2.31603	1e-10	1.78e-09	1e-09	883	tags=29%, list=7%, signal=27%	ABCA2/ABCB9/ACP2/ACP5/AGA/AP1B1/AP1G1/AP1M1/AP1M2/AP1S1/AP1S2/AP3B1/AP3B2/AP3D1/AP3M1/AP3M2/AP3S2/AP4B1/AP4E1/AP4M1/AP4S1/ARSA/ARSB/ARSG/ASAH1/ATP6AP1/ATP6V0A1/ATP6V0A2/ATP6V0B/ATP6V0D1/ATP6V0D2/ATP6V1H
KEGG_VASCULAR_SMOOTH_MUSCLE_CONTRACTION	84	0.710196	2.20556	1.46453e-10	2.36987e-09	1.33139e-09	1846	tags=32%, list=14%, signal=28%	ACTA2/ADCY2/ADCY3/ADCY4/ADCY6/ADCY7/ADCY9/ADORA2A/ADORA2B/ADRA1A/ADRA1B/AGTR1/ARAF/ARHGEF1/ARHGEF11/ARHGEF12/BRAF/CACNA1C/CACNA1D/CACNA1S/CALCRL/CALD1/CALM1/CALM2/CALM3/CALML3/CALML5
KEGG_VIBRIO_CHOLERAE_INFECTION	47	0.79304	2.23144	1.40189e-09	2.07947e-08	1.16824e-08	883	tags=51%, list=7%, signal=48%	ACTB/ACTG1/ADCY3/ADCY9/ARF1/ATP6AP1/ATP6V0A1/ATP6V0A2/ATP6V0B/ATP6V0D1/ATP6V0D2/ATP6V0E1/ATP6V0E2/ATP6V1A/ATP6V1B1/ATP6V1B2/ATP6V1C1/ATP6V1D/ATP6V1E1/ATP6V1E2/ATP6V1F/ATP6V1G1/ATP6V1G2/ATP6V1H
KEGG_GLYCEROLIPID_METABOLISM	33	0.851374	2.26552	1.54702e-09	2.11823e-08	1.19001e-08	370	tags=36%, list=3%, signal=35%	AGK/AGPAT1/AGPAT2/AGPAT3/AGPAT4/AKR1A1/AKR1B1/ALDH1B1/ALDH2/ALDH3A2/ALDH7A1/ALDH9A1
KEGG_PROGESTERONE_MEDIATED_OOCYTE_MATURATION	73	0.716609	2.16702	2.04591e-09	2.60123e-08	1.46137e-08	2245	tags=41%, list=17%, signal=34%	ADCY2/ADCY3/ADCY4/ADCY6/ADCY7/ADCY9/AKT1/AKT2/AKT3/ANAPC1/ANAPC10/ANAPC11/ANAPC13/ANAPC2/ANAPC4/ANAPC5/ANAPC7/ARAF/BRAF/BUB1/CCNA2/CCNB1/CCNB2/CDC16/CDC23/CDC25A/CDC25B/CDC25C/CDC26/CDK2
KEGG_PURINE_METABOLISM	121	0.636844	2.07507	2.22056e-09	2.63506e-08	1.48037e-08	818	tags=13%, list=6%, signal=13%	ADA/ADCY2/ADCY3/ADCY4/ADCY6/ADCY7/ADCY9/ADK/ADSL/AK1/AK2/AK5/ALLC/AMPD3/APRT/ATIC
KEGG_EPITHELIAL_CELL_SIGNALING_IN_HELICOBACTER_PYLORI_INFECTION	57	0.744444	2.18589	1.85154e-08	2.05984e-07	1.15721e-07	883	tags=37%, list=7%, signal=35%	ADAM10/ADAM17/ATP6AP1/ATP6V0A1/ATP6V0A2/ATP6V0B/ATP6V0D1/ATP6V0D2/ATP6V0E1/ATP6V0E2/ATP6V1A/ATP6V1B1/ATP6V1B2/ATP6V1C1/ATP6V1D/ATP6V1E1/ATP6V1E2/ATP6V1F/ATP6V1G1/ATP6V1G2/ATP6V1H
KEGG_ARGININE_AND_PROLINE_METABOLISM	38	0.804806	2.20537	2.99661e-08	3.13763e-07	1.76271e-07	781	tags=37%, list=6%, signal=35%	ACY1/AGMAT/ALDH18A1/ALDH1B1/ALDH2/ALDH3A2/ALDH4A1/ALDH7A1/ALDH9A1/AMD1/ARG1/ARG2/ASL/ASS1
KEGG_LYSINE_DEGRADATION	34	0.810331	2.17136	1.05346e-07	1.04175e-06	5.85255e-07	767	tags=35%, list=6%, signal=33%	AADAT/AASDH/AASDHPPT/AASS/ACAT1/ACAT2/ALDH1B1/ALDH2/ALDH3A2/ALDH7A1/ALDH9A1/ASH1L
KEGG_N_GLYCAN_BIOSYNTHESIS	42	0.777952	2.15365	1.62983e-07	1.52689e-06	8.57806e-07	945	tags=36%, list=7%, signal=33%	ALG1/ALG10B/ALG11/ALG12/ALG13/ALG14/ALG2/ALG3/ALG5/ALG6/ALG8/ALG9/B4GALT1/B4GALT2/B4GALT3
KEGG_TRYPTOPHAN_METABOLISM	23	0.861691	2.15327	2.67577e-07	2.38144e-06	1.33789e-06	370	tags=39%, list=3%, signal=38%	AADAT/ACAT1/ACAT2/AFMID/ALDH1B1/ALDH2/ALDH3A2/ALDH7A1/ALDH9A1
KEGG_BASAL_TRANSCRIPTION_FACTORS	31	-0.761382	-2.09628	1.22167e-06	1.03551e-05	5.81748e-06	2063	tags=55%, list=15%, signal=46%	TAF1/TAF10/TAF11/TAF12/TAF13/TAF1L/TAF2/TAF4/TAF4B/TAF5/TAF5L/TAF6/TAF6L/TAF7/TAF9/TBP/TBPL1
KEGG_PPAR_SIGNALING_PATHWAY	50	0.716988	2.06174	2.23742e-06	1.73157e-05	9.72791e-06	579	tags=26%, list=4%, signal=25%	ACAA1/ACADM/ACOX1/ACOX2/ACOX3/ACSL1/ACSL3/ACSL4/ACSL5/ACSL6/ADIPOQ/ANGPTL4/APOA2
KEGG_ADIPOCYTOKINE_SIGNALING_PATHWAY	58	0.689253	2.02628	2.21434e-06	1.73157e-05	9.72791e-06	348	tags=22%, list=3%, signal=22%	ACACB/ACSL1/ACSL3/ACSL4/ACSL5/ACSL6/ADIPOQ/ADIPOR1/ADIPOR2/AGRP/AKT1/AKT2/AKT3
KEGG_TYROSINE_METABOLISM	25	0.814281	2.08431	3.05237e-06	2.26384e-05	1.27182e-05	534	tags=32%, list=4%, signal=31%	ADH1A/ADH4/ADH5/ADH6/ALDH1A3/ALDH3B1/AOC2/AOC3
KEGG_ALANINE_ASPARTATE_AND_GLUTAMATE_METABOLISM	23	0.833472	2.08275	3.2984e-06	2.34846e-05	1.31936e-05	781	tags=35%, list=6%, signal=33%	ABAT/ADSL/AGXT/ALDH4A1/ALDH5A1/ASL/ASNS/ASS1
KEGG_CALCIUM_SIGNALING_PATHWAY	125	0.563893	1.8334	4.8602e-06	3.32737e-05	1.86931e-05	1858	tags=30%, list=14%, signal=26%	ADCY2/ADCY3/ADCY4/ADCY7/ADCY9/ADORA2A/ADORA2B/ADRA1A/ADRA1B/ADRB2/AGTR1/ATP2A1/ATP2A2/ATP2A3/ATP2B1/ATP2B3/ATP2B4/BDKRB1/BDKRB2/BST1/CACNA1A/CACNA1B/CACNA1C/CACNA1D/CACNA1E/CACNA1H/CACNA1I/CACNA1S/CALM1/CALM2/CALM3/CALML3/CALML5/CAMK2A/CAMK2B/CAMK2D/CAMK2G/CAMK4
KEGG_BIOSYNTHESIS_OF_UNSATURATED_FATTY_ACIDS	17	0.865406	1.99274	1.15765e-05	7.35935e-05	4.13447e-05	123	tags=41%, list=1%, signal=41%	ACAA1/ACOT1/ACOT2/ACOT4/ACOT7/ACOX1/ACOX3
KEGG_GNRH_SIGNALING_PATHWAY	75	0.628183	1.90085	1.11953e-05	7.35935e-05	4.13447e-05	1856	tags=25%, list=14%, signal=22%	ADCY2/ADCY3/ADCY4/ADCY6/ADCY7/ADCY9/ATF4/CACNA1C/CACNA1D/CACNA1S/CALM1/CALM2/CALM3/CALML3/CALML5/CAMK2A/CAMK2B/CAMK2D/CAMK2G
KEGG_BETA_ALANINE_METABOLISM	19	0.838015	1.98729	1.61996e-05	9.79729e-05	5.5041e-05	534	tags=47%, list=4%, signal=46%	ABAT/ACADM/ALDH1B1/ALDH2/ALDH3A2/ALDH7A1/ALDH9A1/AOC2/AOC3
KEGG_RIBOFLAVIN_METABOLISM	12	0.906345	1.92464	1.65123e-05	9.79729e-05	5.5041e-05	127	tags=33%, list=1%, signal=33%	ACP1/ACP2/ACP5/ACP6
KEGG_HISTIDINE_METABOLISM	20	0.832992	2.00741	2.40913e-05	0.000138331	7.77138e-05	421	tags=40%, list=3%, signal=39%	ALDH1A3/ALDH1B1/ALDH2/ALDH3A2/ALDH3B1/ALDH7A1/ALDH9A1/AMDHD1
KEGG_PROTEASOME	40	-0.656032	-1.91909	4.22473e-05	0.000235001	0.000132023	4556	tags=98%, list=34%, signal=64%	POMP/PSMA1/PSMA2/PSMA3/PSMA4/PSMA5/PSMA6/PSMB1/PSMB10/PSMB2/PSMB3/PSMB4/PSMB5/PSMB6/PSMB7/PSMB8/PSMB9/PSMC1/PSMC2/PSMC3/PSMC4/PSMC5/PSMC6/PSMD1/PSMD11/PSMD12/PSMD13/PSMD14/PSMD2/PSMD3/PSMD4/PSMD6/PSMD7/PSMD8/PSME1/PSME2/PSME3/PSME4/PSMF1
KEGG_ARRHYTHMOGENIC_RIGHT_VENTRICULAR_CARDIOMYOPATHY_ARVC	54	0.66241	1.92037	4.98469e-05	0.000268871	0.000151051	1826	tags=35%, list=14%, signal=31%	ACTB/ACTG1/ACTN1/ACTN3/ACTN4/ATP2A2/CACNA1C/CACNA1D/CACNA1S/CACNA2D2/CACNA2D3/CACNA2D4/CACNB1/CACNB2/CACNB3/CACNB4/CACNG1/CACNG5/CACNG6
KEGG_GLYOXYLATE_AND_DICARBOXYLATE_METABOLISM	13	0.881738	1.91452	6.27281e-05	0.0003284	0.000184494	270	tags=23%, list=2%, signal=23%	ACO1/ACO2/AFMID
KEGG_HEMATOPOIETIC_CELL_LINEAGE	77	0.587369	1.79364	6.59648e-05	0.000335478	0.000188471	2827	tags=43%, list=21%, signal=34%	ANPEP/CD14/CD19/CD1A/CD1B/CD1C/CD1D/CD1E/CD2/CD22/CD33/CD34/CD36/CD37/CD38/CD3D/CD3E/CD3G/CD4/CD44/CD5/CD55/CD59/CD7/CD8A/CD8B/CD9/CR1/CR2/CSF1/CSF1R/CSF2RA/CSF3R
KEGG_PHENYLALANINE_METABOLISM	12	0.881317	1.8715	9.8156e-05	0.000485327	0.000272655	534	tags=33%, list=4%, signal=32%	ALDH1A3/ALDH3B1/AOC2/AOC3
KEGG_VIRAL_MYOCARDITIS	57	0.626852	1.84061	0.000161709	0.000777952	0.000437051	2185	tags=28%, list=16%, signal=24%	ABL1/ABL2/ACTB/ACTG1/BID/CASP3/CASP8/CASP9/CAV1/CCND1/CD28/CD40/CD40LG/CD55/CD80/CD86
KEGG_OOCYTE_MEIOSIS	97	0.535103	1.69046	0.000208101	0.00097479	0.000547635	2245	tags=38%, list=17%, signal=32%	ADCY2/ADCY3/ADCY4/ADCY6/ADCY7/ADCY9/ANAPC1/ANAPC10/ANAPC11/ANAPC13/ANAPC2/ANAPC4/ANAPC5/ANAPC7/AR/AURKA/BTRC/BUB1/CALM1/CALM2/CALM3/CALML3/CALML5/CAMK2A/CAMK2B/CAMK2D/CAMK2G/CCNB1/CCNB2/CCNE1/CCNE2/CDC16/CDC20/CDC23/CDC25C/CDC26/CDK2
KEGG_OXIDATIVE_PHOSPHORYLATION	79	0.559039	1.70769	0.000323958	0.00147858	0.000830661	883	tags=27%, list=7%, signal=25%	ATP12A/ATP4B/ATP6AP1/ATP6V0A1/ATP6V0A2/ATP6V0B/ATP6V0D1/ATP6V0D2/ATP6V0E1/ATP6V0E2/ATP6V1A/ATP6V1B1/ATP6V1B2/ATP6V1C1/ATP6V1D/ATP6V1E1/ATP6V1E2/ATP6V1F/ATP6V1G1/ATP6V1G2/ATP6V1H
KEGG_DILATED_CARDIOMYOPATHY	68	0.579567	1.74489	0.00043635	0.00194176	0.00109088	1826	tags=34%, list=14%, signal=29%	ACTB/ACTC1/ACTG1/ADCY2/ADCY3/ADCY4/ADCY6/ADCY7/ADCY9/ATP2A2/CACNA1C/CACNA1D/CACNA1S/CACNA2D2/CACNA2D3/CACNA2D4/CACNB1/CACNB2/CACNB3/CACNB4/CACNG1/CACNG5/CACNG6
KEGG_DRUG_METABOLISM_OTHER_ENZYMES	26	-0.716334	-1.85564	0.000470006	0.00204052	0.00114636	1756	tags=54%, list=13%, signal=47%	TK1/TK2/TPMT/UCK1/UCK2/UCKL1/UGT1A3/UGT1A6/UGT2B11/UGT2B17/UGT2B4/UMPS/UPB1/UPP1
KEGG_METABOLISM_OF_XENOBIOTICS_BY_CYTOCHROME_P450	38	0.675606	1.85133	0.000501926	0.00212721	0.00119506	364	tags=24%, list=3%, signal=23%	ADH1A/ADH4/ADH5/ADH6/AKR1C2/AKR1C3/AKR1C4/ALDH1A3/ALDH3B1
KEGG_REGULATION_OF_ACTIN_CYTOSKELETON	159	0.471473	1.57288	0.000573663	0.0023747	0.0013341	1115	tags=14%, list=8%, signal=13%	ACTB/ACTG1/ACTN1/ACTN3/ACTN4/APC/ARAF/ARHGEF1/ARHGEF12/ARHGEF6/ARHGEF7/ARPC1A/ARPC1B/ARPC2/ARPC3/ARPC4/ARPC5/ARPC5L/BAIAP2/BDKRB1/BDKRB2/BRAF
KEGG_PROTEIN_EXPORT	21	-0.736354	-1.85176	0.000718931	0.0028556	0.00160427	3220	tags=86%, list=24%, signal=65%	SEC11A/SEC11C/SEC61A1/SEC61A2/SEC61B/SEC61G/SEC62/SEC63/SPCS1/SPCS2/SPCS3/SRP14/SRP19/SRP54/SRP68/SRP72/SRP9/SRPRB
KEGG_UBIQUITIN_MEDIATED_PROTEOLYSIS	118	-0.449051	-1.56599	0.000721921	0.0028556	0.00160427	1388	tags=37%, list=10%, signal=34%	TRAF6/TRIM32/TRIM37/TRIP12/UBA2/UBA3/UBA6/UBA7/UBE2A/UBE2B/UBE2C/UBE2D2/UBE2D3/UBE2D4/UBE2E1/UBE2E2/UBE2E3/UBE2F/UBE2G1/UBE2G2/UBE2H/UBE2I/UBE2J1/UBE2J2/UBE2L3/UBE2L6/UBE2M/UBE2N/UBE2O/UBE2Q1/UBE2Q2/UBE2R2/UBE2W/UBE2Z/UBE3A/UBE3B/UBE3C/UBE4A/UBE4B/UBOX5/UBR5/VHL/WWP1/WWP2
KEGG_SNARE_INTERACTIONS_IN_VESICULAR_TRANSPORT	33	-0.654652	-1.81662	0.000770592	0.00298186	0.0016752	2614	tags=82%, list=20%, signal=66%	SNAP23/SNAP29/STX10/STX11/STX12/STX16/STX17/STX18/STX1A/STX2/STX3/STX4/STX5/STX6/STX7/STX8/USE1/VAMP1/VAMP2/VAMP3/VAMP4/VAMP5/VAMP7/VAMP8/VTI1A/VTI1B/YKT6
KEGG_TERPENOID_BACKBONE_BIOSYNTHESIS	14	0.822838	1.79381	0.000825708	0.00312715	0.00175683	99	tags=14%, list=1%, signal=14%	ACAT1/ACAT2
KEGG_ALZHEIMERS_DISEASE	116	0.488774	1.58526	0.00168675	0.00625504	0.00351407	2723	tags=35%, list=20%, signal=28%	ADAM10/ADAM17/APAF1/APBB1/APH1A/APP/ATF6/ATP2A1/ATP2A2/ATP2A3/BACE1/BACE2/BAD/BID/CACNA1C/CACNA1D/CACNA1S/CALM1/CALM2/CALM3/CALML3/CALML5/CAPN1/CAPN2/CASP3/CASP7/CASP8/CASP9/CDK5/CDK5R1/CHP2/COX4I1/COX5A/COX5B/COX6A1/COX6B1/COX6C/COX7A2/COX7B/COX7C/COX8A
KEGG_RNA_POLYMERASE	25	-0.65812	-1.69675	0.00185244	0.00672928	0.00378049	4586	tags=100%, list=34%, signal=66%	POLR1B/POLR1C/POLR1D/POLR1E/POLR2A/POLR2B/POLR2C/POLR2D/POLR2F/POLR2G/POLR2H/POLR2I/POLR2J/POLR2J3/POLR2K/POLR2L/POLR3A/POLR3B/POLR3C/POLR3D/POLR3F/POLR3GL/POLR3H/POLR3K
KEGG_GLYCEROPHOSPHOLIPID_METABOLISM	48	0.606272	1.71923	0.00216692	0.00771424	0.00433385	3197	tags=40%, list=24%, signal=30%	ACHE/AGPAT1/AGPAT2/AGPAT3/AGPAT4/CDIPT/CDS2/CHAT/CHKA/CHKB/CHPT1/CRLS1/DGKA/DGKD/DGKE/DGKG/DGKH/DGKQ/DGKZ
KEGG_PRIMARY_BILE_ACID_BIOSYNTHESIS	10	0.831276	1.70882	0.00223519	0.00780125	0.00438272	417	tags=40%, list=3%, signal=39%	ACOX2/AKR1C4/AKR1D1/AMACR
KEGG_SYSTEMIC_LUPUS_ERYTHEMATOSUS	46	0.609887	1.70778	0.0023833	0.00815823	0.00458328	2185	tags=39%, list=16%, signal=33%	ACTN1/ACTN3/ACTN4/C1QA/C1QB/C1QC/C1R/C1S/C2/C4A/C5/C6/C8B/CD28/CD40/CD40LG/CD80/CD86
KEGG_NITROGEN_METABOLISM	15	0.780794	1.73135	0.00253366	0.00850928	0.00478049	1799	tags=60%, list=13%, signal=52%	AMT/ASNS/CA1/CA13/CA2/CA4/CA5B/CA6/CA9
KEGG_CYSTEINE_AND_METHIONINE_METABOLISM	29	0.671465	1.74244	0.00302699	0.00997784	0.00560553	574	tags=21%, list=4%, signal=20%	ADI1/AHCY/AHCYL1/AHCYL2/AMD1/APIP
KEGG_PARKINSONS_DISEASE	74	-0.474156	-1.56822	0.00482035	0.0156004	0.00876427	1084	tags=22%, list=8%, signal=20%	UBA7/UBB/UBE2G1/UBE2G2/UBE2J1/UBE2J2/UBE2L3/UBE2L6/UQCRB/UQCRC1/UQCRC2/UQCRFS1/UQCRH/UQCRQ/VDAC1/VDAC3
KEGG_GLYCINE_SERINE_AND_THREONINE_METABOLISM	24	0.684594	1.73122	0.0052281	0.0165346	0.00928908	534	tags=25%, list=4%, signal=24%	AGXT/ALAS1/ALAS2/AMT/AOC2/AOC3
KEGG_CHEMOKINE_SIGNALING_PATHWAY	151	0.435409	1.44706	0.00529478	0.0165346	0.00928908	2940	tags=38%, list=22%, signal=30%	ADCY2/ADCY3/ADCY4/ADCY6/ADCY7/ADCY9/AKT1/AKT2/AKT3/ARRB1/ARRB2/BRAF/CCL13/CCL15/CCL19/CCL2/CCL21/CCL23/CCL25/CCL26/CCL28/CCL3/CCL3L1/CCL3L3/CCL4L2/CCL5/CCL8/CCR1/CCR10/CCR2/CCR3/CCR4/CCR5/CCR6/CCR7/CCR8/CCR9/CDC42/CHUK/CRK/CRKL/CSK/CX3CR1/CXCL1/CXCL10/CXCL11/CXCL12/CXCL13/CXCL14/CXCL16/CXCL3/CXCL5/CXCL6/CXCR3/CXCR4/CXCR5/CXCR6
KEGG_FRUCTOSE_AND_MANNOSE_METABOLISM	29	0.653506	1.69584	0.00641632	0.0194535	0.0109289	373	tags=14%, list=3%, signal=13%	AKR1B1/ALDOA/ALDOB/ALDOC
KEGG_DRUG_METABOLISM_CYTOCHROME_P450	39	0.580817	1.59153	0.00644808	0.0194535	0.0109289	364	tags=15%, list=3%, signal=15%	ADH1A/ADH4/ADH5/ADH6/ALDH1A3/ALDH3B1
KEGG_GLYCOSPHINGOLIPID_BIOSYNTHESIS_LACTO_AND_NEOLACTO_SERIES	17	0.739604	1.70306	0.00703597	0.0208734	0.0117266	946	tags=53%, list=7%, signal=49%	B3GALT2/B3GALT5/B3GNT2/B3GNT4/B3GNT5/B4GALT1/B4GALT2/B4GALT3/B4GALT4
KEGG_VASOPRESSIN_REGULATED_WATER_REABSORPTION	39	0.577827	1.58333	0.00724429	0.0211391	0.0118759	3489	tags=67%, list=26%, signal=49%	ADCY3/ADCY6/ADCY9/AQP3/ARHGDIA/ARHGDIB/AVP/AVPR2/CREB1/CREB3/CREB3L2/CREB3L4/CREB5/DCTN1/DCTN2/DCTN4/DCTN5/DCTN6/DYNC1H1/DYNC1I2/DYNC1LI1/DYNC1LI2/DYNC2H1/DYNC2LI1/DYNLL1/DYNLL2
KEGG_ERBB_SIGNALING_PATHWAY	76	0.491859	1.49373	0.0088672	0.0254574	0.0143019	2263	tags=21%, list=17%, signal=18%	ABL1/ABL2/AKT1/AKT2/AKT3/ARAF/BAD/BRAF/CAMK2A/CAMK2B/CAMK2D/CAMK2G/CBL/CBLB/CDKN1A/CDKN1B
KEGG_ALDOSTERONE_REGULATED_SODIUM_REABSORPTION	30	0.615247	1.61455	0.0116801	0.0324853	0.0182502	838	tags=17%, list=6%, signal=16%	ATP1A1/ATP1A3/ATP1B1/ATP1B2/ATP1B3
KEGG_COLORECTAL_CANCER	60	0.515684	1.52267	0.0115965	0.0324853	0.0182502	1115	tags=22%, list=8%, signal=20%	AKT1/AKT2/AKT3/APC/APPL1/ARAF/AXIN1/AXIN2/BAD/BAX/BCL2/BIRC5/BRAF
KEGG_REGULATION_OF_AUTOPHAGY	22	0.671064	1.65911	0.0136511	0.0368167	0.0206835	1046	tags=41%, list=8%, signal=38%	ATG12/ATG3/ATG4A/ATG4B/ATG4C/ATG4D/ATG5/ATG7/BECN1
KEGG_ARACHIDONIC_ACID_METABOLISM	35	0.588331	1.58272	0.0136369	0.0368167	0.0206835	3006	tags=43%, list=22%, signal=33%	AKR1C3/ALOX12/ALOX15/ALOX15B/ALOX5/CBR1/CBR3/CYP2B6/CYP2C8/CYP2E1/CYP2J2/CYP2U1/CYP4A11/CYP4F2/CYP4F3
KEGG_ENDOMETRIAL_CANCER	48	0.538361	1.52665	0.0140495	0.0373256	0.0209694	1115	tags=19%, list=8%, signal=17%	AKT1/AKT2/AKT3/APC/ARAF/AXIN1/AXIN2/BAD/BRAF
KEGG_NEUROACTIVE_LIGAND_RECEPTOR_INTERACTION	141	0.416457	1.36642	0.0145815	0.0381691	0.0214433	2432	tags=21%, list=18%, signal=17%	ADORA1/ADORA2A/ADORA2B/ADORA3/ADRA1A/ADRA1B/ADRA2A/ADRA2B/ADRB2/AGTR1/AGTR2/AVPR2/BDKRB1/BDKRB2/C3AR1/C5AR1/CALCR/CALCRL/CGA/CHRM2/CHRNA1/CHRNA10/CHRNA2/CHRNA3/CHRNA5/CHRNA6/CHRNB1/CHRNB3/CHRNE
KEGG_PROXIMAL_TUBULE_BICARBONATE_RECLAMATION	17	0.707628	1.62943	0.0151306	0.0386482	0.0217125	1796	tags=47%, list=13%, signal=41%	AQP1/ATP1A1/ATP1A3/ATP1B1/ATP1B2/ATP1B3/CA2/CA4
KEGG_CITRATE_CYCLE_TCA_CYCLE	28	0.615389	1.60607	0.0151987	0.0386482	0.0217125	113	tags=11%, list=1%, signal=11%	ACLY/ACO1/ACO2
KEGG_MELANOMA	57	0.505695	1.48486	0.0167727	0.0420499	0.0236236	2265	tags=21%, list=17%, signal=18%	AKT1/AKT2/AKT3/ARAF/BAD/BRAF/CCND1/CDH1/CDK4/CDK6/CDKN1A/CDKN2A
KEGG_GLIOMA	59	0.513118	1.50808	0.0177231	0.0438155	0.0246155	2265	tags=32%, list=17%, signal=27%	AKT1/AKT2/AKT3/ARAF/BRAF/CALM1/CALM2/CALM3/CALML3/CALML5/CAMK2A/CAMK2B/CAMK2D/CAMK2G/CCND1/CDK4/CDK6/CDKN1A/CDKN2A
KEGG_GLYCOSPHINGOLIPID_BIOSYNTHESIS_GLOBO_SERIES	11	0.751062	1.57018	0.0181563	0.0442716	0.0248717	932	tags=27%, list=7%, signal=25%	A4GALT/B3GALNT1/B3GALT5
KEGG_CELL_ADHESION_MOLECULES_CAMS	105	0.442009	1.41622	0.0185855	0.0447056	0.0251155	2615	tags=32%, list=20%, signal=26%	ALCAM/CADM1/CD2/CD22/CD226/CD274/CD276/CD28/CD34/CD4/CD40/CD40LG/CD58/CD6/CD80/CD86/CD8A/CD8B/CD99/CDH1/CDH2/CLDN10/CLDN14/CLDN15/CLDN16/CLDN18/CLDN19/CLDN20/CLDN23/CLDN4/CLDN5/CLDN9/CNTNAP1/CNTNAP2
KEGG_TIGHT_JUNCTION	92	0.45876	1.44071	0.020144	0.0478084	0.0268586	2906	tags=33%, list=22%, signal=26%	ACTB/ACTG1/ACTN1/ACTN3/ACTN4/AKT1/AKT2/AKT3/ASH1L/CASK/CDC42/CDK4/CLDN10/CLDN14/CLDN15/CLDN16/CLDN18/CLDN19/CLDN20/CLDN23/CLDN4/CLDN5/CLDN9/CRB3/CSNK2A1/CSNK2A2/CSNK2B/CTNNA1/CTNNB1/CTTN
KEGG_COMPLEMENT_AND_COAGULATION_CASCADES	52	0.517012	1.49851	0.0207512	0.0486015	0.0273042	2762	tags=50%, list=21%, signal=40%	BDKRB1/BDKRB2/C1QA/C1QB/C1QC/C1R/C1S/C2/C3AR1/C4A/C4BPA/C4BPB/C5/C5AR1/C6/C8B/CD46/CD55/CD59/CFB/CFD/CFH/CFI/CPB2/CR1/CR2

## Sheet: Table S11
Table S11. Gene Ontology Enrichment Analysis Based on Differential Expression Genes Between Subgroup1 (S1) and Subgroup2 (S2) Samples
ID	ONTOLOGY	Description	setSize	enrichmentScore	NES	pvalue	p.adjust	qvalue	rank	leading_edge	core_enrichment
GO:0022626	CC	cytosolic ribosome	96	0.808635	2.58588	0.00157729	0.143315	0.128613	1403	tags=55%, list=10%, signal=50%	RPL31/RPL26/RPS3A/RPL21/RPL39/RPS24/RPS17/RPL23/RPS15A/RPL17/RPS27/RPL9/RPL7/RPL10A/RPL24/RPL27/RPS18/RPL5/RPS27A/RPL35/RPL35A/RPS29/RPL30/RPL15/RPS25/RPL11/RPS6/RPS21/RPS10/RPS27L/RPS20/RPL6/RPL36AL/RPL34/EIF2A/RPL4/RPL3/RPS14/RPS13/RPL27A/RPL13A/RPLP1/RPLP0/RPL26L1/MRPL1/ZCCHC17/RPS28/RPS5/RPL7A/RPS4X/RPS9/RPL22/RPL14
GO:0003735	MF	structural constituent of ribosome	153	0.759728	2.56223	0.00144092	0.143315	0.128613	1968	tags=54%, list=15%, signal=47%	RPL31/RPL26/RPS3A/RPL21/RPL39/RPS24/RPS17/RPL23/RPS15A/RPL17/RPS27/RPL9/RPL7/RPL10A/RPL24/RPL27/RPS18/RPL5/RPS27A/RPL35/RPL35A/RPS29/RPL30/RPL15/RPS25/RPL11/RPS6/MRPS18C/RPS21/MRPL32/RPS10/MRPL3/RPS27L/RPS20/RPL6/MRPS22/RPL36AL/RPL34/MRPL13/RPL4/MRPL33/MRPL51/MRPS31/MRPS33/MRPL15/RPL3/RPS14/MRPL22/RPS13/MRPS35/MRPS21/RPL27A/RPL13A/RPLP1/RPLP0/RPL26L1/MRPL36/MRPL1/RPS28/RPS5/RPL7A/RPS4X/MRPS30/SRB…
GO:0044391	CC	ribosomal subunit	166	0.754567	2.54303	0.00149701	0.143315	0.128613	1403	tags=45%, list=10%, signal=40%	RPL31/RPL26/RPS3A/RPL21/RPL39/RPS24/RPS17/RPL23/RPS15A/RPL17/RPS27/RPL9/RPL7/RPL10A/RPL24/RPL27/RPS18/RPL5/RPS27A/RPL35/RPL35A/RPS29/RPL30/RPL15/RPS25/RPL11/RPS6/MRPS18C/RPS21/MRPL32/RPS10/MRPL50/MRPL3/RPS27L/RPS20/RPL6/MRPS22/RPL36AL/RPL34/MRPL13/EIF2A/RPL4/MRPL33/MRPL51/MRPS33/MRPL15/RPL3/RPS14/MRPL22/RPS13/MRPS35/MRPS21/RPL27A/RPL13A/RPLP1/RPLP0/MRPS28/MRPL39/RPL26L1/MRPL36/MRPL1/MRPL48/ZCCHC1…
GO:0002181	BP	cytoplasmic translation	126	0.768174	2.51256	0.00153374	0.143315	0.128613	1729	tags=51%, list=13%, signal=45%	RPL31/RPL26/RPS3A/RPL21/RPL39/RPS24/RPS17/RPL23/RPS15A/RPL17/RPS27/RPL9/RPL7/RPL10A/RPL24/RPL27/RPS18/RPL5/RPS27A/EIF4A2/RPL35/RPL35A/RPS29/RPL30/RPL15/RPS25/RPL11/RPS6/RPS21/RPS10/EIF3M/DENR/RPS20/NCK1/RPL6/RPL34/EIF3A/RPL4/RPL3/RPS14/RPS13/DPH5/RPL27A/RPL13A/RPLP1/RPLP0/RPL26L1/MCTS1/DHX36/RPS28/RPS5/CNBP/RPL7A/RPS4X/RPS9/RPL22/RPL14/DPH3/DRG1/RPL32/RPL23A/RPS7/HNRNPU/RPS26
GO:0005840	CC	ribosome	190	0.723954	2.46688	0.00146628	0.143315	0.128613	1897	tags=47%, list=14%, signal=41%	RPL31/RPL26/RPS3A/RPL21/RPL39/RPS24/RPS17/RPL23/RPS15A/RPL17/RPS27/RPL9/RPL7/RPL10A/RPL24/RPL27/RPS18/RPL5/RPS27A/RPL35/RPL35A/RPS29/RPL30/RPL15/RPS25/RPL11/RPS6/MRPS18C/RPS21/MRPL32/RPS10/MRPL50/MRPL3/RPS27L/RPS20/NCK1/RPL6/MRPS22/SERP1/RPL36AL/RPL34/MRPL13/EIF2A/RPL4/MRPL33/MRPL51/MRPS33/MRPL15/RPL3/RPS14/MRPL22/RPS13/MRPS35/HSPA14/MRPS21/RPL27A/RPL13A/RPLP1/RPLP0/MRPS28/MRPL39/RPL26L1/MRPL36/M…
GO:0015934	CC	large ribosomal subunit	104	0.751851	2.4265	0.0015748	0.143315	0.128613	1897	tags=53%, list=14%, signal=46%	RPL31/RPL26/RPL21/RPL39/RPL23/RPL17/RPL9/RPL7/RPL10A/RPL24/RPL27/RPL5/RPL35/RPL35A/RPL30/RPL15/RPL11/MRPL32/MRPL50/MRPL3/RPL6/RPL36AL/RPL34/MRPL13/RPL4/MRPL33/MRPL51/MRPL15/RPL3/MRPL22/RPL27A/RPL13A/RPLP1/RPLP0/MRPL39/RPL26L1/MRPL36/MRPL1/MRPL48/ZCCHC17/MRPL45/RPL7A/MRPS30/MRPL17/MRPL18/RPL22/RPL14/MRPL46/RPL32/RPL23A/MRPL35/RPL12/MRPL14/MRPL42/RPL36
GO:0022625	CC	cytosolic large ribosomal subunit	55	0.821381	2.41099	0.00168919	0.143315	0.128613	1037	tags=53%, list=8%, signal=49%	RPL31/RPL26/RPL21/RPL39/RPL23/RPL17/RPL9/RPL7/RPL10A/RPL24/RPL27/RPL5/RPL35/RPL35A/RPL30/RPL15/RPL11/RPL6/RPL36AL/RPL34/RPL4/RPL3/RPL27A/RPL13A/RPLP1/RPLP0/RPL26L1/MRPL1/ZCCHC17
GO:0015935	CC	small ribosomal subunit	65	0.737146	2.22933	0.00164745	0.143315	0.128613	1342	tags=42%, list=10%, signal=38%	RPS3A/RPS24/RPS17/RPS15A/RPS27/RPS18/RPS27A/RPS29/RPS25/RPS6/MRPS18C/RPS21/RPS10/RPS27L/RPS20/MRPS22/EIF2A/MRPS33/RPS14/RPS13/MRPS35/MRPS21/MRPS28/RPS28/RPS5/RPS4X/RPS9
GO:0022627	CC	cytosolic small ribosomal subunit	40	0.792936	2.21399	0.00170648	0.143315	0.128613	1342	tags=52%, list=10%, signal=47%	RPS3A/RPS24/RPS17/RPS15A/RPS27/RPS18/RPS27A/RPS29/RPS25/RPS6/RPS21/RPS10/RPS27L/RPS20/EIF2A/RPS14/RPS13/RPS28/RPS5/RPS4X/RPS9
GO:0042273	BP	ribosomal large subunit biogenesis	53	0.749009	2.18589	0.00169779	0.143315	0.128613	1659	tags=47%, list=12%, signal=41%	RPL26/RPL7/RPL10A/RPL24/RPL5/RPL35/RPL35A/RPL11/RPL6/RPL3/NIP7/GTF3A/ZNHIT3/RPLP0/RPL26L1/DDX18/MRPL1/GTPBP4/SDAD1/RPL7A/WDR12/RRP15/RPL14/RPL23A/PAK1IP1
GO:1990904	CC	ribonucleoprotein complex	539	0.547788	2.04799	0.00125471	0.143315	0.128613	2109	tags=37%, list=16%, signal=32%	RPL31/RPL26/RPS3A/RPL21/RPL39/RPS24/RPS17/RPL23/RPS15A/RPL17/RPS27/RPL9/SNRPG/RPL7/RPL10A/DCP2/RPL24/EIF3E/RPL27/RPS18/RPL5/RPS27A/PSMA6/LSM3/RPL35/RPL35A/RPS29/RPL30/VBP1/RPL15/RPS25/RPL11/RPS6/SRP9/MRPS18C/RPS21/SRP14/CLNS1A/PTGES3/MRPL32/ZFP36L1/HNRNPC/RPS10/EIF3M/MRPL50/XPO1/DHX15/MRPL3/RPS27L/RPS20/RPL6/SSB/MRPS22/LSM5/RPL36AL/RPL34/MRPL13/RBM12B/G3BP2/EIF2A/EIF3A/RPL4/SLU7/CDC40/MRPL33/SMND…
GO:0042788	CC	polysomal ribosome	29	0.783971	2.04109	0.00178571	0.143315	0.128613	1897	tags=55%, list=14%, signal=47%	RPL31/RPL39/RPL10A/RPL24/RPS29/RPL30/RPL11/RPS21/RPL6/RPS28/RPL7A/BTF3/RPL32/RPS26/NUFIP2/RPL36
GO:1903902	BP	positive regulation of viral life cycle	19	-0.807343	-2.01267	0.00218341	0.143315	0.128613	1198	tags=58%, list=9%, signal=53%	VPS4A/TRIM11/P4HB/CD74/TRIM38/CD4/LGALS9/TRIM21/VPS37B/KPNA6/HLA-DRB1
GO:0008013	MF	beta-catenin binding	65	-0.626622	-2.00973	0.00253165	0.143315	0.128613	1779	tags=34%, list=13%, signal=29%	TCF4/ASH2L/VCL/RUVBL2/BCL9/EP300/BCL9L/SETD1A/CALCOCO1/PXN/HDAC6/DVL3/CTNNA1/GSK3B/MED12/SLC9A3R1/TAX1BP3/TBL1X/FOXO4/FOXO3/CHD8/CARM1
GO:0042254	BP	ribosome biogenesis	222	0.577048	2.00418	0.00143678	0.143315	0.128613	1929	tags=36%, list=14%, signal=31%	RPL26/RPS24/RPS17/RPS27/RPL7/RPL10A/RPL24/RPL27/RPL5/RPL35/RPL35A/RPS25/RPL11/RPS6/RPS21/ABCE1/XPO1/RPS27L/RPL6/EIF2A/FRG1/RIOK2/WDR75/RPL3/NGDN/RPS14/MRPL22/METTL5/NUP88/TFB2M/NIP7/GTF3A/NOL11/ZNHIT3/EMG1/RPLP0/UTP14C/SBDS/NMD3/RPL26L1/MRPL36/WDR36/DDX21/DDX18/RRN3/MRPL1/UTP6/GNL2/RPS28/NOL8/EXOSC1/RPS5/GTPBP4/GTF2H5/LTV1/RAN/SDAD1/RPL7A/WDR12/PTEN/XRCC5/EXOSC8/RRP15/EXOSC3/RPL14/CUL4B/UTP3/RPL2…
GO:0001725	CC	stress fiber	51	-0.648267	-1.99074	0.00242718	0.143315	0.128613	2396	tags=43%, list=18%, signal=36%	PGM5/PRKCZ/TPM4/CORO1B/TRIP6/ABLIM1/CYBA/FHOD1/ACTA2/LCP1/MYL9/PXN/CNN2/FSCN1/PDLIM1/SIPA1L3/FHL3/PDLIM7/MYH9/ACTN4/ZYX/ACTN1
GO:0097517	CC	contractile actin filament bundle	51	-0.648267	-1.99074	0.00242718	0.143315	0.128613	2396	tags=43%, list=18%, signal=36%	PGM5/PRKCZ/TPM4/CORO1B/TRIP6/ABLIM1/CYBA/FHOD1/ACTA2/LCP1/MYL9/PXN/CNN2/FSCN1/PDLIM1/SIPA1L3/FHL3/PDLIM7/MYH9/ACTN4/ZYX/ACTN1
GO:0032432	CC	actin filament bundle	56	-0.626572	-1.96041	0.00248139	0.143315	0.128613	2396	tags=41%, list=18%, signal=34%	PGM5/PRKCZ/TPM4/CORO1B/TRIP6/ABLIM1/CYBA/FHOD1/ACTA2/LCP1/MYL9/PXN/FLNA/CNN2/FSCN1/PDLIM1/SIPA1L3/FHL3/PDLIM7/MYH9/ACTN4/ZYX/ACTN1
GO:0042641	CC	actomyosin	57	-0.614891	-1.93384	0.00246305	0.143315	0.128613	2396	tags=42%, list=18%, signal=35%	PGM5/PRKCZ/STX1A/TPM4/CORO1B/TRIP6/ABLIM1/CYBA/DBN1/FHOD1/ACTA2/LCP1/MYL9/PXN/CNN2/FSCN1/PDLIM1/SIPA1L3/FHL3/PDLIM7/MYH9/ACTN4/ZYX/ACTN1
GO:0022613	BP	ribonucleoprotein complex biogenesis	302	0.537957	1.92529	0.00137741	0.143315	0.128613	1929	tags=33%, list=14%, signal=29%	RPL26/RPS24/RPS17/RPS27/SNRPG/RPL7/RPL10A/RPL24/RPL27/RPL5/RPL35/RPL35A/RPS25/RPL11/RPS6/RPS21/CLNS1A/PTGES3/ABCE1/XPO1/DENR/RPS27L/RPL6/PSIP1/EIF2A/EIF3A/SLU7/FRG1/RIOK2/DDX1/WDR75/RPL3/NGDN/RPS14/MRPL22/METTL5/NUP88/TFB2M/NIP7/GTF3A/NOL11/STRAP/ZNHIT3/EMG1/RPL13A/PTBP2/RPLP0/UTP14C/SNRPF/SBDS/NMD3/RPL26L1/MRPL36/WDR36/MCTS1/DDX21/DDX18/RRN3/MRPL1/NUDT21/UTP6/GNL2/RPS28/NOL8/EXOSC1/RPS5/GTPBP4/G…
GO:0006412	BP	translation	494	0.516746	1.91771	0.00128205	0.143315	0.128613	1959	tags=29%, list=15%, signal=26%	RPL31/RPL26/RPS3A/RPL21/RPL39/RPS24/RPS17/RPL23/RPS15A/RPL17/RPS27/RPL9/RPL7/RPL10A/DCP2/RPL24/EIF3E/RPL27/RPS18/RPL5/RPS27A/EIF4A2/RPL35/RPL35A/RPS29/RPL30/CYP1B1/LSM1/RPL15/RPS25/RPL11/RPS6/SRP9/MRPS18C/RPS6KB1/RPS21/MRPL32/ZFP36L1/ABCE1/EIF4G2/RPS10/EIF3M/XRN1/MRPL3/DENR/RPS27L/COPS5/RPS20/NCK1/RPL6/EEF1E1/MTPN/SERP1/RPL36AL/RPL34/MRPL13/EIF2A/EIF3A/RPL4/PAN3/MRPL51/MRPS33/EEF1G/DDX1/RPL3/TMED…
GO:0005501	MF	retinoid binding	22	-0.746817	-1.90577	0.00225734	0.143315	0.128613	373	tags=18%, list=3%, signal=18%	PTGDS/IGF2R/RXRA/RARA
GO:0019840	MF	isoprenoid binding	22	-0.746817	-1.90577	0.00225734	0.143315	0.128613	373	tags=18%, list=3%, signal=18%	PTGDS/IGF2R/RXRA/RARA
GO:0006364	BP	rRNA processing	163	0.564045	1.90016	0.00149031	0.143315	0.128613	1929	tags=32%, list=14%, signal=28%	RPL26/RPS24/RPS17/RPS27/RPL7/RPL10A/RPL27/RPL5/RPL35/RPL35A/RPS25/RPL11/RPS6/RPS21/FRG1/RIOK2/WDR75/NGDN/RPS14/METTL5/TFB2M/NOL11/ZNHIT3/EMG1/UTP14C/SBDS/WDR36/DDX21/DDX18/MRPL1/UTP6/RPS28/NOL8/EXOSC1/GTPBP4/GTF2H5/RPL7A/WDR12/EXOSC8/RRP15/EXOSC3/RPL14/UTP3/FBL/RPS7/RIOK3/EBNA1BP2/DKC1/PWP1/EXOSC9/CHD7/RPUSD4
GO:0042255	BP	ribosome assembly	47	0.664355	1.89794	0.0017301	0.143315	0.128613	1785	tags=40%, list=13%, signal=35%	RPS27/RPL24/RPL5/RPL11/RPS27L/RPL6/EIF2A/RPL3/RPS14/MRPL22/NIP7/RPLP0/SBDS/RPS28/RPS5/XRCC5/RPL23A/C1QBP/MRPS7
GO:0005844	CC	polysome	55	0.645552	1.89489	0.00168919	0.143315	0.128613	2103	tags=44%, list=16%, signal=37%	RPL31/RPL39/RPL10A/RPL24/PSMA6/RPS29/RPL30/VBP1/RPL11/RPS6/RPS21/RPL6/FXR1/RPS28/RPL7A/RPS4X/BTF3/DRG1/RPL32/RPS26/NUFIP2/RPL36/EIF2S1/PNPT1
GO:0061162	BP	establishment of monopolar cell polarity	15	-0.808797	-1.89295	0.00213675	0.143315	0.128613	1547	tags=47%, list=12%, signal=41%	MYO9A/RHOA/GBF1/FSCN1/SLC9A3R1/SH3BP1/MSN
GO:0061339	BP	establishment or maintenance of monopolar cell polarity	15	-0.808797	-1.89295	0.00213675	0.143315	0.128613	1547	tags=47%, list=12%, signal=41%	MYO9A/RHOA/GBF1/FSCN1/SLC9A3R1/SH3BP1/MSN
GO:0043043	BP	peptide biosynthetic process	513	0.50852	1.89088	0.00126582	0.143315	0.128613	1959	tags=28%, list=15%, signal=25%	RPL31/RPL26/RPS3A/RPL21/RPL39/RPS24/RPS17/RPL23/RPS15A/RPL17/RPS27/RPL9/RPL7/RPL10A/DCP2/RPL24/EIF3E/RPL27/RPS18/RPL5/RPS27A/EIF4A2/RPL35/RPL35A/RPS29/RPL30/CYP1B1/LSM1/RPL15/RPS25/RPL11/RPS6/SRP9/MRPS18C/RPS6KB1/RPS21/MRPL32/ZFP36L1/ABCE1/EIF4G2/RPS10/EIF3M/XRN1/MRPL3/DENR/RPS27L/COPS5/RPS20/NCK1/RPL6/EEF1E1/MTPN/SERP1/RPL36AL/RPL34/MRPL13/EIF2A/EIF3A/RPL4/NFE2L2/PAN3/MRPL51/MRPS33/EEF1G/DDX1/RP…
GO:0071526	BP	semaphorin-plexin signaling pathway	32	-0.681484	-1.88752	0.00235294	0.143315	0.128613	3254	tags=50%, list=24%, signal=38%	SEMA7A/PLXNB2/ECE1/RAC1/PLXNA3/FARP2/HAND2/PLXND1/MET/SEMA4B/NCAM1/FLNA/SEMA4D/SH3BP1/ARHGDIA/SEMA4A
GO:0046598	BP	positive regulation of viral entry into host cell	11	-0.870194	-1.86997	0.00214133	0.143315	0.128613	1198	tags=73%, list=9%, signal=66%	TRIM11/P4HB/CD74/TRIM38/CD4/LGALS9/TRIM21/HLA-DRB1
GO:0075294	BP	positive regulation by symbiont of entry into host	11	-0.870194	-1.86997	0.00214133	0.143315	0.128613	1198	tags=73%, list=9%, signal=66%	TRIM11/P4HB/CD74/TRIM38/CD4/LGALS9/TRIM21/HLA-DRB1
GO:0005198	MF	structural molecule activity	474	0.506034	1.86824	0.00130039	0.143315	0.128613	1403	tags=19%, list=10%, signal=17%	RPL31/RPL26/RPS3A/RPL21/RPL39/RPS24/RPS17/RPL23/RPS15A/RPL17/RPS27/RPL9/RPL7/RPL10A/RPL24/RPL27/RPS18/RPL5/RPS27A/ACTR3/RPL35/RPL35A/RPS29/RPL30/RPL15/RPS25/RPL11/RPS6/MRPS18C/RPS21/MRPL32/RPS10/MRPL3/RPS27L/RPS20/RPL6/MRPS22/ACTR2/RPL36AL/NUP54/RPL34/MRPL13/EIF3A/RPL4/MRPL33/MRPL51/MRPS31/MRPS33/MRPL15/RPL3/RPS14/MRPL22/NUP88/PNN/COPB1/RPS13/MRPS35/MYL6/ARPC3/MATR3/MRPS21/RPL27A/ARPC5/RPL13A/RPL…
GO:0098798	CC	mitochondrial protein-containing complex	199	0.544413	1.8628	0.00146628	0.143315	0.128613	2493	tags=42%, list=19%, signal=35%	COX7C/NDUFA4/TOMM7/UQCRQ/NDUFB3/COX7A2/NDUFB2/NDUFS4/COX7B/NDUFA1/NDUFS5/MRPS18C/MRPL32/MRPL50/MRPL3/NDUFAB1/COX6C/SDHD/TOMM20/MRPS22/MRPL13/MRPL33/MRPL51/MRPS33/MRPL15/MRPL22/NDUFB5/MTX2/MRPS35/GRPEL2/MRPS21/UQCRC2/DNAJC15/MRPS28/MRPL39/MRPL36/SUCLG2/DLD/MRPL48/PDHX/MRPL45/MRPS30/MRPL17/MRPL18/MTX3/TIMM9/UQCRB/DNAJC19/DLAT/MRPL46/AGK/UQCRH/SUCLG1/MRPS7/MRPL35/MRPL14/NDUFV2/MRPL42/COX6A1/HSPA9/DA…
GO:0043300	BP	regulation of leukocyte degranulation	43	-0.625224	-1.85775	0.00234742	0.143315	0.128613	2073	tags=60%, list=16%, signal=51%	CEACAM1/GAB2/HLA-F/CD84/HMOX1/AP1G1/CD300A/PDPK1/SPHK2/STX4/IL4R/RAC2/LYN/LGALS9/GATA1/ITGB2/ITGAM/UNC13D/NCKAP1L/LAMP1/PTAFR/SPI1/SYK/FES/PRAM1/STXBP2
GO:0000313	CC	organellar ribosome	75	0.603049	1.85655	0.00170068	0.143315	0.128613	2483	tags=47%, list=19%, signal=38%	MRPS18C/MRPL32/MRPL50/MRPL3/MRPS22/MRPL13/MRPL33/MRPL51/MRPS33/MRPL15/MRPL22/MRPS35/MRPS21/MRPS28/MRPL39/MRPL36/MRPL48/MRPL45/MRPS30/MRPL17/MRPL18/MRPL46/MRPS7/MRPL35/MRPL14/MRPL42/DAP3/MRPL19/MRPL24/MRPS10/MRPL9/MRPL34/MRPS17/MRPS14/MRPL11
GO:0005761	CC	mitochondrial ribosome	75	0.603049	1.85655	0.00170068	0.143315	0.128613	2483	tags=47%, list=19%, signal=38%	MRPS18C/MRPL32/MRPL50/MRPL3/MRPS22/MRPL13/MRPL33/MRPL51/MRPS33/MRPL15/MRPL22/MRPS35/MRPS21/MRPS28/MRPL39/MRPL36/MRPL48/MRPL45/MRPS30/MRPL17/MRPL18/MRPL46/MRPS7/MRPL35/MRPL14/MRPL42/DAP3/MRPL19/MRPL24/MRPS10/MRPL9/MRPL34/MRPS17/MRPS14/MRPL11
GO:1902563	BP	regulation of neutrophil activation	12	-0.844477	-1.85261	0.00215517	0.143315	0.128613	455	tags=67%, list=3%, signal=64%	CD300A/ITGB2/ITGAM/PTAFR/SPI1/SYK/PRAM1/GRN
GO:0031838	CC	haptoglobin-hemoglobin complex	10	-0.87903	-1.85223	0.00210084	0.143315	0.128613	351	tags=55%, list=3%, signal=53%	HBD/HBD/HBZ/HBE1/HBM/HBQ1
GO:0002275	BP	myeloid cell activation involved in immune response	82	-0.55274	-1.85171	0.00251889	0.143315	0.128613	1683	tags=44%, list=13%, signal=39%	CD84/HMOX1/FCER1G/LILRA2/CD300A/PDPK1/SPHK2/STX4/TYROBP/IL4R/TICAM1/LAT/RAC2/PLCG2/LYN/CBL/LGALS9/SBNO2/VAMP2/GATA1/ITGB2/IFI35/ITGAM/DOCK2/UNC13D/PTGDS/PYCARD/PTAFR/SPI1/SYK/FES/PRAM1/GRN/PIK3CD/STXBP2/DYSF
GO:0042274	BP	ribosomal small subunit biogenesis	55	0.628511	1.84486	0.00337838	0.143315	0.128613	1802	tags=40%, list=13%, signal=35%	RPS24/RPS17/RPS27/RPS25/RPS6/RPS21/RPS27L/RIOK2/NGDN/RPS14/NOL11/EMG1/UTP6/RPS28/RPS5/GTF2H5/LTV1/XRCC5/UTP3/RPS7/MRPS7/RIOK3
GO:0051444	BP	negative regulation of ubiquitin-protein transferase activity	21	0.765242	1.84257	0.00178891	0.143315	0.128613	1718	tags=38%, list=13%, signal=33%	RPL23/RPL5/RPL11/BUB3/RPS20/PARK7/FBXO5/RPS7
GO:0005344	MF	oxygen carrier activity	11	-0.857333	-1.84233	0.00214133	0.143315	0.128613	351	tags=50%, list=3%, signal=49%	HBD/HBD/HBZ/HBE1/HBM/HBQ1
GO:0070469	CC	respirasome	64	0.610958	1.8396	0.00166945	0.143315	0.128613	788	tags=25%, list=6%, signal=24%	COX7C/NDUFA4/UQCRQ/NDUFB3/COX7A2/NDUFB2/NDUFS4/COX7B/NDUFA1/NDUFS5/HIGD1A/NDUFAB1/COX6C/SDHD/NDUFB5/UQCRC2
GO:0005833	CC	hemoglobin complex	10	-0.871558	-1.83648	0.00210084	0.143315	0.128613	607	tags=64%, list=5%, signal=61%	CYB5R3/HBD/HBD/HBZ/HBE1/HBM/HBQ1
GO:0005751	CC	mitochondrial respiratory chain complex IV	15	0.824011	1.83375	0.00187266	0.143315	0.128613	788	tags=40%, list=6%, signal=38%	COX7C/NDUFA4/COX7A2/COX7B/COX6C/UQCRC2
GO:0045277	CC	respiratory chain complex IV	15	0.824011	1.83375	0.00187266	0.143315	0.128613	788	tags=40%, list=6%, signal=38%	COX7C/NDUFA4/COX7A2/COX7B/COX6C/UQCRC2
GO:0098803	CC	respiratory chain complex	57	0.619045	1.8318	0.00167785	0.143315	0.128613	788	tags=26%, list=6%, signal=25%	COX7C/NDUFA4/UQCRQ/NDUFB3/COX7A2/NDUFB2/NDUFS4/COX7B/NDUFA1/NDUFS5/NDUFAB1/COX6C/SDHD/NDUFB5/UQCRC2
GO:0046596	BP	regulation of viral entry into host cell	37	-0.637574	-1.83037	0.00244499	0.143315	0.128613	1804	tags=43%, list=13%, signal=38%	GSN/IFITM3/TRIM8/TRIM11/P4HB/CD74/FCN1/TRIM38/IFITM2/CD4/TRIM25/LY6E/LGALS9/TRIM21/TRIM26/HLA-DRB1
GO:0005746	CC	mitochondrial respirasome	60	0.61426	1.82929	0.00165563	0.143315	0.128613	788	tags=25%, list=6%, signal=24%	COX7C/NDUFA4/UQCRQ/NDUFB3/COX7A2/NDUFB2/NDUFS4/COX7B/NDUFA1/NDUFS5/NDUFAB1/COX6C/SDHD/NDUFB5/UQCRC2
GO:1904666	BP	regulation of ubiquitin protein ligase activity	21	0.7574	1.82369	0.00178891	0.143315	0.128613	1718	tags=38%, list=13%, signal=33%	RPL23/RPL5/RPL11/RPS20/PTEN/DNM1L/FBXO5/RPS7
GO:0019843	MF	rRNA binding	53	0.623432	1.81941	0.00339559	0.143315	0.128613	2056	tags=43%, list=15%, signal=37%	RPL23/RPL9/RPS18/RPL5/RPL11/MRPS18C/RPL3/RPS14/RPS13/GTF3A/EMG1/RPLP0/SBDS/DDX21/RPS5/RPS4X/RPS9/MRPL18/RPL23A/MRPS7/RPL12/RPUSD4/NGRN
GO:0043604	BP	amide biosynthetic process	611	0.482276	1.81846	0.00123762	0.143315	0.128613	2417	tags=32%, list=18%, signal=28%	RPL31/RPL26/RPS3A/RPL21/RPL39/RPS24/RPS17/RPL23/RPS15A/RPL17/RPS27/RPL9/RPL7/RPL10A/DCP2/RPL24/EIF3E/RPL27/RPS18/RPL5/RPS27A/EIF4A2/RPL35/RPL35A/RPS29/RPL30/ELOVL5/CYP1B1/LSM1/RPL15/RPS25/RPL11/RPS6/SRP9/MRPS18C/RPS6KB1/RPS21/MRPL32/ZFP36L1/ABCE1/EIF4G2/RPS10/EIF3M/XRN1/MRPL3/DENR/RPS27L/COPS5/RPS20/NCK1/RPL6/EEF1E1/MTPN/SERP1/RPL36AL/ORMDL1/RPL34/MRPL13/PPCS/EIF2A/EIF3A/RPL4/NFE2L2/PRKAA1/PAN3/M…
GO:0042805	MF	actinin binding	29	-0.660968	-1.80899	0.00226244	0.143315	0.128613	968	tags=24%, list=7%, signal=22%	ADORA2A/RELA/NFKB1/PDLIM1/CSRP1/RARA/PDLIM7
GO:0038034	BP	signal transduction in absence of ligand	51	-0.588209	-1.80631	0.00485437	0.143315	0.128613	1237	tags=24%, list=9%, signal=21%	BAX/BOK/IFI6/CTNNA1/GSK3B/RIPK1/GATA1/PPP2R1A/PPP1CA/MKNK2/BCL2L1/FOXO3
GO:0097192	BP	extrinsic apoptotic signaling pathway in absence of ligand	51	-0.588209	-1.80631	0.00485437	0.143315	0.128613	1237	tags=24%, list=9%, signal=21%	BAX/BOK/IFI6/CTNNA1/GSK3B/RIPK1/GATA1/PPP2R1A/PPP1CA/MKNK2/BCL2L1/FOXO3
GO:0001972	MF	retinoic acid binding	14	-0.787558	-1.7983	0.00213675	0.143315	0.128613	258	tags=50%, list=2%, signal=49%	CRABP1/LCN12/CYP26B1/UGT1A3/IGF2R/RXRA/RARA
GO:0033561	BP	regulation of water loss via skin	19	-0.720754	-1.79681	0.00218341	0.143315	0.128613	1479	tags=37%, list=11%, signal=33%	TMEM79/MET/ELOVL1/SRF/ALOX12/KRT1/GBA
GO:0016072	BP	rRNA metabolic process	191	0.525384	1.79127	0.00146843	0.143315	0.128613	1929	tags=29%, list=14%, signal=25%	RPL26/RPS24/RPS17/RPS27/RPL7/RPL10A/RPL27/RPL5/RPL35/RPL35A/RPS25/RPL11/RPS6/RPS21/XRN1/FRG1/RIOK2/WDR75/NGDN/RPS14/METTL5/TFB2M/GTF3A/NOL11/ZNHIT3/EMG1/UTP14C/SBDS/WDR36/DDX21/DDX18/MRPL1/UTP6/GTF3C3/RPS28/NOL8/EXOSC1/GTPBP4/GTF2H5/RPL7A/WDR12/EXOSC8/RRP15/EXOSC3/RPL14/UTP3/FBL/RPS7/RIOK3/EBNA1BP2/DKC1/PWP1/EXOSC9/CHD7/RPUSD4
GO:0042773	BP	ATP synthesis coupled electron transport	56	0.606211	1.78956	0.0033389	0.143315	0.128613	974	tags=29%, list=7%, signal=27%	COX7C/NDUFA4/UQCRQ/NDUFB3/NDUFB2/NDUFS4/NDUFA1/NDUFS5/NDUFAB1/SDHD/NDUFB5/CHCHD2/DNAJC15/PARK7/DLD/GHITM
GO:0042775	BP	mitochondrial ATP synthesis coupled electron transport	56	0.606211	1.78956	0.0033389	0.143315	0.128613	974	tags=29%, list=7%, signal=27%	COX7C/NDUFA4/UQCRQ/NDUFB3/NDUFB2/NDUFS4/NDUFA1/NDUFS5/NDUFAB1/SDHD/NDUFB5/CHCHD2/DNAJC15/PARK7/DLD/GHITM
GO:2001239	BP	regulation of extrinsic apoptotic signaling pathway in absence of ligand	32	-0.645679	-1.78835	0.00235294	0.143315	0.128613	730	tags=22%, list=5%, signal=21%	IFI6/CTNNA1/RIPK1/GATA1/PPP2R1A/PPP1CA/BCL2L1
GO:0031646	BP	positive regulation of nervous system process	22	-0.700501	-1.78758	0.00225734	0.143315	0.128613	460	tags=23%, list=3%, signal=22%	CST7/TNFRSF1B/PTAFR/GBA/RNF10
GO:0000470	BP	maturation of LSU-rRNA	18	0.760664	1.78112	0.00550459	0.143315	0.128613	1357	tags=56%, list=10%, signal=50%	RPL7/RPL10A/RPL35/ZNHIT3/DDX18/MRPL1/GTPBP4/RPL7A/WDR12/RRP15
GO:0006518	BP	peptide metabolic process	639	0.470482	1.77842	0.0012285	0.143315	0.128613	1959	tags=26%, list=15%, signal=23%	RPL31/RPL26/RPS3A/RPL21/RPL39/RPS24/RPS17/RPL23/RPS15A/RPL17/RPS27/RPL9/RPL7/RPL10A/DCP2/RPL24/EIF3E/RPL27/RPS18/RPL5/RPS27A/EIF4A2/ARL6IP5/RPL35/RPL35A/IFNGR1/RPS29/RPL30/CYP1B1/LSM1/PRNP/RPL15/RPS25/RPL11/RPS6/SRP9/MRPS18C/RPS6KB1/RPS21/MRPL32/ZFP36L1/ABCE1/EIF4G2/SEC11C/RPS10/EIF3M/XRN1/MRPL3/DENR/RPS27L/COPS5/RPS20/SEC11A/NCK1/RPL6/EEF1E1/MTPN/SERP1/RPL36AL/CPD/RPL34/MRPL13/EIF2A/EIF3A/RPL4/N…
GO:0050728	BP	negative regulation of inflammatory response	105	-0.514963	-1.77826	0.0027027	0.143315	0.128613	1101	tags=25%, list=8%, signal=23%	AOAH/PLCG1/ALOX5/NLRX1/ADORA2A/ADA/NFKB1/GSTP1/NR1D1/HCK/LYN/SHARPIN/FEM1A/TNFRSF1A/CST7/TNFRSF1B/FURIN/NLRP12/SYK/KRT1/GBA/GPX1/GPS2/GRN/PGLYRP1/HLA-DRB1
GO:0035089	BP	establishment of apical/basal cell polarity	13	-0.802707	-1.77463	0.00221729	0.143315	0.128613	1547	tags=46%, list=12%, signal=41%	MYO9A/RHOA/FSCN1/SLC9A3R1/SH3BP1/MSN
GO:0051438	BP	regulation of ubiquitin-protein transferase activity	52	0.606942	1.77437	0.00334448	0.143315	0.128613	1800	tags=31%, list=13%, signal=27%	RPL23/RPL5/BMI1/RPL11/UBE2N/BUB3/RPS20/DCUN1D5/DCUN1D4/PARK7/PTEN/DNM1L/FBXO5/TOPORS/RPS7/ARRDC3
GO:0030863	CC	cortical cytoskeleton	77	-0.536022	-1.77329	0.00248139	0.143315	0.128613	1909	tags=40%, list=14%, signal=35%	MYADM/PPP1R9B/GSN/NUMA1/EPB41/PVALB/SPTBN4/DBN1/ACTB/SPTBN1/CTTN/LLGL1/CLDN5/HCLS1/CORO1A/DBNL/FLOT2/LASP1/WDR1/COTL1/TMOD1/SPTAN1/CAPZB/GYPC/FLOT1/MYH9/MPP1/ACTN4/EPB42/SLC4A1/ACTN1
GO:0035580	CC	specific granule lumen	49	-0.579348	-1.77145	0.00475059	0.143315	0.128613	1539	tags=41%, list=12%, signal=36%	VCL/LTF/NEU1/TOLLIP/FOLR3/PDXK/ACAA1/CTSZ/GHDC/CNN2/NFKB1/ORM1/LRG1/DOCK2/SPTAN1/CFP/OSCAR/LCN2/PGLYRP1/CTSD
GO:0043202	CC	lysosomal lumen	74	-0.538816	-1.77048	0.00486618	0.143315	0.128613	2509	tags=39%, list=19%, signal=32%	LAMP2/NAGLU/AGRN/SDC3/NPC2/TCN2/ATP13A2/SMPD1/ARSA/NEU1/MAN2B2/NCAN/GM2A/SGSH/GUSB/GLA/CD74/GAA/PSAP/GPC6/RNASET2/GNS/GBA/MAN2B1/IFI30/TPP1/CTSB/CTSD/CTSA
GO:0045116	BP	protein neddylation	16	0.783041	1.7694	0.00374532	0.143315	0.128613	1110	tags=56%, list=8%, signal=52%	RBX1/RPL5/RPL11/NAE1/DCUN1D5/DCUN1D4/UBA3/HIF1A/RNF7
GO:0004879	MF	nuclear receptor activity	37	-0.615357	-1.76658	0.00244499	0.143315	0.128613	1264	tags=19%, list=9%, signal=17%	RXRB/AHR/NR1D1/NR1H2/RXRA/RARA/STAT3
GO:0098531	MF	ligand-activated transcription factor activity	37	-0.615357	-1.76658	0.00244499	0.143315	0.128613	1264	tags=19%, list=9%, signal=17%	RXRB/AHR/NR1D1/NR1H2/RXRA/RARA/STAT3
GO:0031348	BP	negative regulation of defense response	178	-0.476908	-1.76592	0.00311526	0.143315	0.128613	2073	tags=33%, list=16%, signal=28%	CEACAM1/SIRT2/GPATCH3/GIT1/HLA-F/METRNL/VSIG4/RNF26/MICB/FYN/MFHAS1/FAM3A/STAT2/IL10/OAS1/SERPING1/ARRB2/CRK/PARP14/HLA-E/AOAH/PLCG1/ALOX5/TTLL12/NLRX1/ADORA2A/ADA/TRAFD1/NFKB1/HLA-B/GSTP1/NR1D1/HCK/TRIM38/PCBP2/LYN/SHARPIN/NPLOC4/LGALS9/FEM1A/HLA-A/TNFRSF1A/CST7/TNFRSF1B/TRIM21/ADAR/FURIN/KIR2DL4/NLRP12/NR1H2/SYK/KRT1/GBA/GPX1/GPS2/GRN/PGLYRP1/SEC14L1/HLA-DRB1
GO:0019646	BP	aerobic electron transport chain	50	0.609311	1.76304	0.0034188	0.143315	0.128613	939	tags=28%, list=7%, signal=26%	COX7C/NDUFA4/UQCRQ/NDUFB3/NDUFB2/NDUFS4/NDUFA1/NDUFS5/NDUFAB1/SDHD/NDUFB5/DNAJC15/PARK7/DLD
GO:0031579	BP	membrane raft organization	21	-0.694163	-1.75907	0.00225734	0.143315	0.128613	1909	tags=48%, list=14%, signal=41%	MYADM/GSN/S100A10/ABCA7/ANXA2/PACSIN2/CLN3/FLOT2/DOCK2/FLOT1
GO:0007158	BP	neuron cell-cell adhesion	11	-0.818517	-1.75892	0.00214133	0.143315	0.128613	44	tags=18%, list=0%, signal=18%	CDK5R1/NINJ2
GO:0061615	BP	glycolytic process through fructose-6-phosphate	14	-0.770279	-1.75885	0.00213675	0.143315	0.128613	1708	tags=50%, list=13%, signal=44%	ENO2/GALK1/PFKP/PFKL/HK3/ENO1/SLC4A1
GO:0015301	MF	anion:anion antiporter activity	16	-0.735539	-1.75868	0.0042735	0.143315	0.128613	1844	tags=25%, list=14%, signal=22%	SLC25A11/SLC4A2/SLC26A6/SLC4A1
GO:0140323	MF	solute:anion antiporter activity	16	-0.735539	-1.75868	0.0042735	0.143315	0.128613	1844	tags=25%, list=14%, signal=22%	SLC25A11/SLC4A2/SLC26A6/SLC4A1
GO:0016655	MF	oxidoreductase activity, acting on NAD(P)H, quinone or similar compound as acceptor	42	0.627853	1.75472	0.00346021	0.143315	0.128613	660	tags=24%, list=5%, signal=23%	NDUFA4/NDUFB3/NDUFB2/NDUFS4/NDUFA1/NDUFS5/CRYZ/AKR1C3/NDUFB5/CBR4
GO:0001765	BP	membrane raft assembly	10	-0.832614	-1.75442	0.00210084	0.143315	0.128613	1749	tags=50%, list=13%, signal=43%	S100A10/ANXA2/PACSIN2/FLOT2/FLOT1
GO:0070069	CC	cytochrome complex	23	0.713143	1.75172	0.00536673	0.143315	0.128613	788	tags=30%, list=6%, signal=29%	COX7C/NDUFA4/UQCRQ/COX7A2/COX7B/COX6C/UQCRC2
GO:0045198	BP	establishment of epithelial cell apical/basal polarity	10	-0.830083	-1.74909	0.00210084	0.143315	0.128613	1547	tags=50%, list=12%, signal=44%	MYO9A/RHOA/SLC9A3R1/SH3BP1/MSN
GO:0000027	BP	ribosomal large subunit assembly	21	0.726171	1.7485	0.00536673	0.143315	0.128613	844	tags=29%, list=6%, signal=27%	RPL24/RPL5/RPL11/RPL6/RPL3/RPLP0
GO:0098800	CC	inner mitochondrial membrane protein complex	83	0.560511	1.74809	0.00164204	0.143315	0.128613	1952	tags=35%, list=15%, signal=30%	COX7C/NDUFA4/UQCRQ/NDUFB3/COX7A2/NDUFB2/NDUFS4/COX7B/NDUFA1/NDUFS5/NDUFAB1/COX6C/SDHD/NDUFB5/MTX2/GRPEL2/UQCRC2/DNAJC15/MTX3/TIMM9/UQCRB/DNAJC19/AGK/UQCRH/NDUFV2/COX6A1/HSPA9/UQCRFS1/TIMM23
GO:0052372	BP	modulation by symbiont of entry into host	42	-0.588101	-1.74809	0.00235849	0.143315	0.128613	1804	tags=38%, list=13%, signal=33%	GSN/IFITM3/TRIM8/TRIM11/P4HB/CD74/FCN1/TRIM38/IFITM2/CD4/TRIM25/LY6E/LGALS9/TRIM21/TRIM26/HLA-DRB1
GO:0001931	CC	uropod	11	-0.812893	-1.74683	0.00214133	0.143315	0.128613	1667	tags=73%, list=12%, signal=64%	ICAM2/PSTPIP1/SELPLG/FLOT2/PIP5K1C/FLOT1/MYH9/MSN
GO:0031254	CC	cell trailing edge	11	-0.812893	-1.74683	0.00214133	0.143315	0.128613	1667	tags=73%, list=12%, signal=64%	ICAM2/PSTPIP1/SELPLG/FLOT2/PIP5K1C/FLOT1/MYH9/MSN
GO:1900026	BP	positive regulation of substrate adhesion-dependent cell spreading	35	-0.617306	-1.74594	0.00240385	0.143315	0.128613	2833	tags=46%, list=21%, signal=36%	NEDD9/RAC1/PREX1/DOCK5/TRIOBP/MYADM/S100A10/CRKL/CRK/TESK1/P4HB/FLNA/DAB2/CALR/UNC13D/DNM2
GO:0006907	BP	pinocytosis	18	-0.709911	-1.74585	0.00218818	0.143315	0.128613	1889	tags=44%, list=14%, signal=38%	EHD4/MAPKAPK2/CLN3/MAPKAPK3/DOCK2/PYCARD/NR1H2/DNM2
GO:0051015	MF	actin filament binding	154	-0.483958	-1.74438	0.00321543	0.143315	0.128613	1498	tags=28%, list=11%, signal=25%	ABLIM1/SPTBN4/DBN1/PSTPIP1/RCSD1/FHOD1/MYOM2/MYL4/ABI3/LCP1/SPTBN1/CTTN/BIN1/FLNA/MARCKSL1/FSCN1/TWF2/HCLS1/CORO1A/CTNNA1/ARPC1B/HIP1/DBNL/ADD1/LASP1/WDR1/CFL1/COTL1/MYO1G/FMNL1/TMOD1/SPTAN1/ARPC4/FLII/CAPZB/MICAL1/MAP1S/MYH9/CORO7/ACTN4/TLN1/MYO1F/ACTN1
GO:0071380	BP	cellular response to prostaglandin E stimulus	14	0.795568	1.74289	0.00374532	0.143315	0.128613	485	tags=29%, list=4%, signal=28%	PTGER4/GNG2/PTGER2/PRKAA1
GO:0000146	MF	microfilament motor activity	20	-0.690356	-1.74026	0.0021978	0.143315	0.128613	441	tags=20%, list=3%, signal=19%	MYO1G/MYH9/MYO9B/MYO1F
GO:0051549	BP	positive regulation of keratinocyte migration	10	-0.824614	-1.73757	0.00210084	0.143315	0.128613	692	tags=20%, list=5%, signal=19%	IQSEC1/MMP9
GO:0017166	MF	vinculin binding	10	-0.824208	-1.73671	0.00210084	0.143315	0.128613	908	tags=40%, list=7%, signal=37%	PXN/CTNNA1/TLN1/ACTN1
GO:0030215	MF	semaphorin receptor binding	15	-0.741806	-1.73617	0.0042735	0.143315	0.128613	1438	tags=27%, list=11%, signal=24%	SEMA4B/SEMA4D/SH3BP1/SEMA4A
GO:0000315	CC	organellar large ribosomal subunit	49	0.602545	1.73606	0.00344234	0.143315	0.128613	2483	tags=49%, list=19%, signal=40%	MRPL32/MRPL50/MRPL3/MRPL13/MRPL33/MRPL51/MRPL15/MRPL22/MRPL39/MRPL36/MRPL48/MRPL45/MRPS30/MRPL17/MRPL18/MRPL46/MRPL35/MRPL14/MRPL42/MRPL19/MRPL24/MRPL9/MRPL34/MRPL11
GO:0005762	CC	mitochondrial large ribosomal subunit	49	0.602545	1.73606	0.00344234	0.143315	0.128613	2483	tags=49%, list=19%, signal=40%	MRPL32/MRPL50/MRPL3/MRPL13/MRPL33/MRPL51/MRPL15/MRPL22/MRPL39/MRPL36/MRPL48/MRPL45/MRPS30/MRPL17/MRPL18/MRPL46/MRPL35/MRPL14/MRPL42/MRPL19/MRPL24/MRPL9/MRPL34/MRPL11
GO:0003779	MF	actin binding	318	-0.445675	-1.73378	0.00361011	0.143315	0.128613	2231	tags=29%, list=17%, signal=24%	ARPC1A/TPM4/CORO1B/IPP/INF2/GAS7/CEACAM1/S100A4/PICK1/CORO2A/TRIOBP/PPP1R9B/GSN/MICAL2/MYBPC3/RUSC1/SSH1/EPB41/MYO9A/VCL/FXYD5/ABLIM1/SPTBN4/DBN1/EVL/VASP/PSTPIP1/RCSD1/FHOD1/MYOM2/FKBP15/VASH1/MYL4/ABI3/PFN1/LCP1/MSRB2/SPTBN1/SSH3/CTTN/EMD/BIN1/P4HB/FLNA/MARCKSL1/HDAC6/CNN2/FSCN1/TWF2/HCLS1/CORO1A/CTNNA1/ARPC1B/VPS18/HIP1/DBNL/SNCA/PDLIM1/PLEKHG3/ADD1/LASP1/WDR1/CFL1/COTL1/MYO1G/FMNL1/TMOD1/PARV…
GO:1901017	BP	negative regulation of potassium ion transmembrane transporter activity	13	0.796196	1.73093	0.00544465	0.143315	0.128613	798	tags=23%, list=6%, signal=22%	CRBN/CAB39/STK39
GO:1901796	BP	regulation of signal transduction by p53 class mediator	76	0.560663	1.7295	0.00169205	0.143315	0.128613	1841	tags=30%, list=14%, signal=26%	RPL26/RPL23/RPL5/ZMPSTE24/RPL11/PSMD10/SIRT1/RPS20/EEF1E1/SPRED1/MYC/RRM2B/RRN3/TRIAP1/PYHIN1/C16orf72/DDX5/PMAIP1/DYRK1A/PAK1IP1/RPS7/BCL2/TP53RK
GO:0044790	BP	suppression of viral release by host	14	-0.756679	-1.72779	0.0042735	0.143315	0.128613	1341	tags=43%, list=10%, signal=39%	TRIM8/TRIM11/TRIM25/TRIM21/TRIM28/TRIM26
GO:1902337	BP	regulation of apoptotic process involved in morphogenesis	10	-0.819622	-1.72705	0.00210084	0.143315	0.128613	1237	tags=40%, list=9%, signal=36%	BAX/NOTCH1/TNFRSF1A/TNFRSF1B
GO:1904748	BP	regulation of apoptotic process involved in development	10	-0.819622	-1.72705	0.00210084	0.143315	0.128613	1237	tags=40%, list=9%, signal=36%	BAX/NOTCH1/TNFRSF1A/TNFRSF1B
GO:0014902	BP	myotube differentiation	69	-0.537797	-1.72529	0.00520833	0.143315	0.128613	1513	tags=22%, list=11%, signal=19%	SKI/BCL9/BIN3/KEL/IL4R/DYRK1B/NOTCH1/TNFSF14/SORT1/EHD1/RBM38/GPX1/CFLAR/FLOT1/MYH9
GO:1903900	BP	regulation of viral life cycle	112	-0.497853	-1.72274	0.00284091	0.143315	0.128613	1829	tags=32%, list=14%, signal=28%	VPS4A/GSN/IFITM3/OAS1/EIF2AK2/ISG20/LARP1/LTF/MX1/DDB1/TRIM8/PARP10/TRIM11/OASL/P4HB/CD74/FCN1/TRIM38/IFITM2/NOTCH1/APOBEC3C/CD4/TRIM25/LY6E/LGALS9/SETDB1/TRIM21/ADAR/TRIM28/TNIP1/ZNFX1/RAD23A/TRIM26/VPS37B/KPNA6/HLA-DRB1
GO:0002716	BP	negative regulation of natural killer cell mediated immunity	19	-0.69076	-1.72204	0.00218341	0.143315	0.128613	2073	tags=47%, list=16%, signal=40%	CEACAM1/HLA-F/ARRB2/CRK/HLA-E/HLA-B/LGALS9/HLA-A/KIR2DL4
GO:0045953	BP	negative regulation of natural killer cell mediated cytotoxicity	18	-0.699881	-1.72118	0.00218818	0.143315	0.128613	2073	tags=50%, list=16%, signal=42%	CEACAM1/HLA-F/ARRB2/CRK/HLA-E/HLA-B/LGALS9/HLA-A/KIR2DL4
GO:0000768	BP	syncytium formation by plasma membrane fusion	36	-0.600306	-1.71932	0.00479616	0.143315	0.128613	1302	tags=42%, list=10%, signal=38%	CD81/CACNA1H/MYOG/PLEKHO1/CAMK1/TYROBP/IL4R/DYRK1B/TCTA/SBNO2/TNFSF14/EHD1/CFLAR/FLOT1/MYH9
GO:0140253	BP	cell-cell fusion	36	-0.600306	-1.71932	0.00479616	0.143315	0.128613	1302	tags=42%, list=10%, signal=38%	CD81/CACNA1H/MYOG/PLEKHO1/CAMK1/TYROBP/IL4R/DYRK1B/TCTA/SBNO2/TNFSF14/EHD1/CFLAR/FLOT1/MYH9
GO:0043299	BP	leukocyte degranulation	67	-0.53692	-1.71809	0.00524934	0.143315	0.128613	1683	tags=51%, list=13%, signal=45%	CEACAM1/GAB2/HLA-F/CD84/HMOX1/AP1G1/CD300A/PDPK1/SPHK2/STX4/IL4R/LAT/RAC2/NKG7/CORO1A/HCK/LYN/CBL/LGALS9/VAMP2/GATA1/ITGB2/ITGAM/UNC13D/NCKAP1L/PTGDS/LAMP1/PTAFR/SPI1/SYK/FES/PRAM1/PIK3CD/STXBP2
GO:0016176	MF	superoxide-generating NADPH oxidase activator activity	10	-0.814358	-1.71596	0.00210084	0.143315	0.128613	1654	tags=50%, list=12%, signal=44%	NOXO1/NCF1B/NCF4/NCF1/NCF1C
GO:0010954	BP	positive regulation of protein processing	17	-0.707267	-1.71294	0.00434783	0.143315	0.128613	2745	tags=53%, list=21%, signal=42%	F12/SRC/RHBDD1/GSN/S100A10/ANXA2/ADAM8/ENO1/MYH9
GO:0015669	BP	gas transport	16	-0.716307	-1.71269	0.0042735	0.143315	0.128613	351	tags=35%, list=3%, signal=34%	HBD/HBD/HBZ/HBE1/HBM/HBQ1
GO:0005938	CC	cell cortex	212	-0.456667	-1.71138	0.0031348	0.143315	0.128613	1909	tags=28%, list=14%, signal=24%	MYADM/NRBP1/PPP1R9B/GSN/NUMA1/ENO2/PDZD4/EPB41/PVALB/PTK2B/SPTBN4/DBN1/RHOA/ACTB/RHOF/DCTN1/STIM1/PFN1/SPTBN1/CTTN/MYL9/EMD/LLGL1/CTSZ/PXN/FNBP1/FLNA/RAC2/CLDN5/FSCN1/HCLS1/CORO1A/DYNC1H1/DBNL/AGTRAP/SNCA/PHLDB1/FLOT2/TNFAIP2/EXOC3/LASP1/WDR1/COTL1/FMNL1/TMOD1/SPTAN1/ACTR1A/CAPZB/GYPC/ENO1/FLOT1/MYH9/MYO9B/RHOG/MPP1/ACTN4/EPB42/SLC4A1/ACTN1
GO:0005884	CC	actin filament	85	-0.506979	-1.70864	0.0025641	0.143315	0.128613	2307	tags=36%, list=17%, signal=30%	SRC/TPM4/CORO1B/GAS7/TFPT/FYN/ACTG1/SPTBN4/DBN1/ACTB/PSTPIP1/RCSD1/LCP1/CTTN/RAC2/TWF2/HCLS1/CORO1A/HCK/VPS18/DBNL/PDLIM1/MARK2/COTL1/TMOD1/PAK1/WAS/PDLIM7/DIAPH1/MYO9B/ACTN1
GO:1902476	BP	chloride transmembrane transport	33	-0.609385	-1.7074	0.004662	0.143315	0.128613	1318	tags=15%, list=10%, signal=14%	SLC12A9/SLC26A6/BEST1/CLCN7/SLC4A1
GO:0006837	BP	serotonin transport	11	-0.793127	-1.70435	0.00214133	0.143315	0.128613	604	tags=45%, list=5%, signal=43%	CNR1/ITGB3/SNCA/P2RX1/SYK
GO:0055001	BP	muscle cell development	115	-0.490116	-1.70374	0.00284091	0.143315	0.128613	1960	tags=23%, list=15%, signal=19%	TBX18/ENG/FHL2/ACTG1/SKI/CTDP1/BIN3/KEL/MYOM2/YY1/MYL9/SRF/BIN1/NOTCH1/CSRP1/WDR1/TMOD1/FLII/GPX1/CFLAR/MEGF10/ACTN4/G6PD/LMNA/ACTN1/DYSF
GO:0043249	BP	erythrocyte maturation	12	-0.775672	-1.70167	0.00431034	0.143315	0.128613	1699	tags=50%, list=13%, signal=44%	ERCC2/KLF2/ZBTB7A/TRIM58/EPB42/G6PD
GO:0006413	BP	translational initiation	104	0.527135	1.70126	0.0015748	0.143315	0.128613	1502	tags=27%, list=11%, signal=24%	RPS3A/RPS17/EIF3E/EIF4A2/RPS6KB1/ABCE1/EIF4G2/EIF3M/DENR/COPS5/NCK1/EIF2A/EIF3A/DDX1/TMED2/YTHDF3/ATF4/RPL13A/KHDRBS1/MCTS1/UHMK1/MTIF3/RPS5/BANK1/NCBP2/EIF3J/MTIF2/BZW2
GO:0022904	BP	respiratory electron transport chain	72	0.549646	1.69926	0.00325203	0.143315	0.128613	1949	tags=33%, list=15%, signal=29%	COX7C/NDUFA4/UQCRQ/NDUFB3/NDUFB2/NDUFS4/NDUFA1/NDUFS5/NDUFAB1/SDHD/NDUFB5/CHCHD2/DNAJC15/PARK7/DLD/GHITM/ETFA/SLC25A13/BID/UQCRB/UQCRH/NDUFV2/COX6A1/UQCRFS1
GO:0072109	BP	glomerular mesangium development	13	-0.767303	-1.69636	0.00443459	0.143315	0.128613	1103	tags=31%, list=8%, signal=28%	ACTA2/IL6R/NOTCH1/CFLAR
GO:0070141	BP	response to UV-A	11	-0.789334	-1.69621	0.00428266	0.143315	0.128613	82	tags=45%, list=1%, signal=45%	MME/EGFR/AKT1/TIMP1/MMP9
GO:0060143	BP	positive regulation of syncytium formation by plasma membrane fusion	15	-0.724491	-1.69564	0.0042735	0.143315	0.128613	1747	tags=40%, list=13%, signal=35%	CAMK1/TYROBP/IL4R/TNFSF14/EHD1/FLOT1
GO:0015671	BP	oxygen transport	12	-0.772666	-1.69507	0.00431034	0.143315	0.128613	351	tags=46%, list=3%, signal=45%	HBD/HBD/HBZ/HBE1/HBM/HBQ1
GO:0002281	BP	macrophage activation involved in immune response	16	-0.708705	-1.69452	0.0042735	0.143315	0.128613	1302	tags=50%, list=10%, signal=45%	TYROBP/TICAM1/PLCG2/SBNO2/IFI35/SYK/GRN/DYSF
GO:0030220	BP	platelet formation	20	-0.671748	-1.69335	0.0021978	0.143315	0.128613	1885	tags=55%, list=14%, signal=47%	CASP9/MPL/EP300/SRF/ZFPM1/NBEAL2/WDR1/GATA1/ZNF385A/MYH9/ACTN1
GO:0035994	BP	response to muscle stretch	20	-0.67169	-1.69321	0.0021978	0.143315	0.128613	861	tags=35%, list=6%, signal=33%	RAF1/GSN/RELA/NFKB1/NFKBIA/SLC9A1/GPI
GO:0046597	BP	negative regulation of viral entry into host cell	17	-0.699106	-1.69318	0.00434783	0.143315	0.128613	1804	tags=53%, list=13%, signal=46%	GSN/IFITM3/TRIM8/TRIM11/FCN1/IFITM2/TRIM25/LY6E/TRIM26
GO:0034470	BP	ncRNA processing	298	0.472618	1.69043	0.00138696	0.143315	0.128613	1935	tags=28%, list=14%, signal=24%	RPL26/RPS24/RPS17/RPS27/RPL7/RPL10A/RPL27/RPL5/RPL35/RPL35A/RPS25/ZMPSTE24/RPL11/RPS6/RPS21/SSB/FRG1/RIOK2/DDX1/WDR75/NGDN/RPS14/METTL5/INTS8/TFB2M/NOL11/LARP7/ZNHIT3/PUM2/EMG1/UTP14C/TSNAX/SBDS/WDR36/GRSF1/DDX21/DDX18/PRKRA/MRPL1/UTP6/RPS28/NOL8/EXOSC1/GTPBP4/GTF2H5/RPL7A/WDR12/INTS2/EXOSC8/RRP15/EXOSC3/DDX5/RPL14/BCDIN3D/MAP2K1/TYW3/DICER1/TARBP1/DPH3/INTS6/UTP3/THUMPD2/FBL/RPS7/ZC3H7A/TRMT12/N…
GO:0072012	BP	glomerulus vasculature development	19	-0.677981	-1.69018	0.00436681	0.143315	0.128613	1228	tags=26%, list=9%, signal=24%	PECAM1/ACTA2/IL6R/NOTCH1/CFLAR
GO:0000054	BP	ribosomal subunit export from nucleus	12	0.799976	1.69004	0.00557621	0.143315	0.128613	1209	tags=67%, list=9%, signal=61%	ABCE1/XPO1/RIOK2/NUP88/NMD3/LTV1/RAN/SDAD1
GO:0033750	BP	ribosome localization	12	0.799976	1.69004	0.00557621	0.143315	0.128613	1209	tags=67%, list=9%, signal=61%	ABCE1/XPO1/RIOK2/NUP88/NMD3/LTV1/RAN/SDAD1
GO:0006119	BP	oxidative phosphorylation	75	0.548067	1.68728	0.00170068	0.143315	0.128613	1949	tags=36%, list=15%, signal=31%	COX7C/NDUFA4/UQCRQ/NDUFB3/COX7A2/NDUFB2/NDUFS4/NDUFA1/NDUFS5/NDUFAB1/SDHD/NDUFB5/CHCHD2/UQCRC2/DNAJC15/MYC/PARK7/DLD/GHITM/ATP7A/BID/UQCRB/UQCRH/NDUFV2/PDE12/COX6A1/UQCRFS1
GO:0046461	BP	neutral lipid catabolic process	22	-0.66112	-1.68708	0.00451467	0.143315	0.128613	3167	tags=55%, list=24%, signal=42%	FAAH/ABHD5/LIPE/ABHD6/ABHD12B/MGLL/PIK3CG/DAGLB/LYPLA2/ABHD2/PNPLA2/SORL1
GO:0046464	BP	acylglycerol catabolic process	22	-0.66112	-1.68708	0.00451467	0.143315	0.128613	3167	tags=55%, list=24%, signal=42%	FAAH/ABHD5/LIPE/ABHD6/ABHD12B/MGLL/PIK3CG/DAGLB/LYPLA2/ABHD2/PNPLA2/SORL1
GO:0010765	BP	positive regulation of sodium ion transport	23	-0.65091	-1.68532	0.00451467	0.143315	0.128613	411	tags=26%, list=3%, signal=25%	AHCYL1/WNK1/SLC9A1/DNM2/TESC/ACTN4
GO:1902307	BP	positive regulation of sodium ion transmembrane transport	16	-0.704355	-1.68411	0.0042735	0.143315	0.128613	186	tags=31%, list=1%, signal=31%	WNK1/SLC9A1/DNM2/TESC/ACTN4
GO:0043603	BP	cellular amide metabolic process	827	0.439816	1.68124	0.00116822	0.143315	0.128613	1929	tags=24%, list=14%, signal=22%	RPL31/RPL26/RPS3A/RPL21/RPL39/RPS24/RPS17/RPL23/RPS15A/RPL17/RPS27/RPL9/RPL7/RPL10A/DCP2/RPL24/EIF3E/RPL27/RPS18/RPL5/RPS27A/EIF4A2/ARL6IP5/RPL35/RPL35A/IFNGR1/RPS29/RPL30/ELOVL5/CYP1B1/LSM1/PRNP/RPL15/RPS25/RPL11/RPS6/SRP9/MRPS18C/RPS6KB1/RPS21/MRPL32/ZFP36L1/ABCE1/EIF4G2/SEC11C/RPS10/EIF3M/XRN1/MCEE/MRPL3/DENR/RPS27L/COPS5/RPS20/SEC11A/NCK1/RPL6/EEF1E1/MTPN/SERP1/RPL36AL/ORMDL1/CPD/RPL34/MRPL13…
GO:0006120	BP	mitochondrial electron transport, NADH to ubiquinone	35	0.618546	1.67879	0.00511945	0.143315	0.128613	939	tags=31%, list=7%, signal=29%	NDUFA4/NDUFB3/NDUFB2/NDUFS4/NDUFA1/NDUFS5/NDUFAB1/NDUFB5/DNAJC15/PARK7/DLD
GO:0005516	MF	calmodulin binding	141	-0.471462	-1.67649	0.00315457	0.143315	0.128613	1747	tags=21%, list=13%, signal=18%	CAMK1/MAPKAPK2/EPB41/PHKG2/EDF1/MBP/SPTBN1/STRN4/CDK5RAP2/MAPKAPK3/MARCKSL1/CNN2/DAPK2/ORAI1/PPP3R1/ADD1/CAMK1G/VAMP2/MYO1G/PHKA2/SPTAN1/ITPKB/UBR4/MKNK2/SLC9A1/MYH9/MYO9B/MYO1F/NRGN
GO:1905048	BP	regulation of metallopeptidase activity	10	-0.795004	-1.67517	0.00420168	0.143315	0.128613	1256	tags=40%, list=9%, signal=36%	MBP/STAT3/TIMP1/SORL1
GO:2001135	BP	regulation of endocytic recycling	14	-0.73192	-1.67126	0.0042735	0.143315	0.128613	1225	tags=29%, list=9%, signal=26%	GRIPAP1/ARHGAP1/EHD1/SORL1
GO:0097550	CC	transcription preinitiation complex	10	0.822704	1.67086	0.00380228	0.143315	0.128613	740	tags=30%, list=6%, signal=28%	GTF2F2/GTF2E1/GTF2B
GO:1903319	BP	positive regulation of protein maturation	19	-0.668703	-1.66705	0.00436681	0.143315	0.128613	3056	tags=53%, list=23%, signal=41%	SOX4/F12/SRC/RHBDD1/GSN/S100A10/ANXA2/ADAM8/ENO1/MYH9
GO:0034645	BP	cellular macromolecule biosynthetic process	812	0.435361	1.66502	0.0011655	0.143315	0.128613	1986	tags=25%, list=15%, signal=22%	RPL31/RPL26/RPS3A/RPL21/RPL39/RPS24/RPS17/RPL23/RPS15A/RPL17/RPS27/RPL9/RPL7/RPL10A/DCP2/RPL24/EIF3E/RPL27/RPS18/RPL5/RPS27A/EIF4A2/RB1CC1/RPL35/PIGY/RPL35A/RPS29/RPL30/CYP1B1/LSM1/RPL15/RPS25/ZDHHC17/RPL11/RPS6/SRP9/MRPS18C/DPM1/RPS6KB1/RPS21/PTGES3/MRPL32/ZFP36L1/ABCE1/EIF4G2/RPS10/EIF3M/XRN1/OGT/TMEM59/MRPL3/DENR/RPS27L/COPS5/RPS20/NCK1/RPL6/EEF1E1/MTPN/SERP1/RPL36AL/ABCB10/ITM2A/RPL34/PIGA/MR…
GO:1903305	BP	regulation of regulated secretory pathway	111	-0.481241	-1.66491	0.00282486	0.143315	0.128613	2328	tags=36%, list=17%, signal=30%	GIPC1/STX1A/ZP3/CEACAM1/GAB2/FBXL20/GIT1/HLA-F/CD84/HMOX1/RIMS4/AP1G1/CD300A/PDPK1/SPHK2/STX4/IL4R/ADORA2A/RAC2/VPS18/NOTCH1/CALM3/GSK3B/LYN/P2RX1/LGALS9/GATA1/ITGB2/ITGAM/UNC13D/NCKAP1L/LAMP1/PTAFR/SPI1/SYK/FES/MICAL1/GNAI2/PRAM1/STXBP2
GO:0036344	BP	platelet morphogenesis	21	-0.655714	-1.66164	0.00451467	0.143315	0.128613	1885	tags=52%, list=14%, signal=45%	CASP9/MPL/EP300/SRF/ZFPM1/NBEAL2/WDR1/GATA1/ZNF385A/MYH9/ACTN1
GO:0060561	BP	apoptotic process involved in morphogenesis	20	-0.659088	-1.66144	0.0043956	0.143315	0.128613	1237	tags=35%, list=9%, signal=32%	HAND2/BAK1/BAX/NOTCH1/TNFRSF1A/TNFRSF1B/SPI1
GO:0022618	BP	ribonucleoprotein complex assembly	124	0.506873	1.65853	0.00152672	0.143315	0.128613	1804	tags=29%, list=13%, signal=25%	RPS27/SNRPG/RPL24/RPL5/RPL11/CLNS1A/PTGES3/DENR/RPS27L/RPL6/PSIP1/EIF3A/SLU7/DDX1/RPL3/RPS14/STRAP/ZNHIT3/RPL13A/PTBP2/RPLP0/SNRPF/MCTS1/NUDT21/RPS28/RPS5/PRPF18/XRCC5/GEMIN6/COIL/SNRPD2/RPL23A/ISY1/MRPS7/CRNKL1/SRPK1
GO:0051258	BP	protein polymerization	205	-0.436992	-1.6324	0.00318471	0.143315	0.128613	1995	tags=30%, list=15%, signal=26%	TRIOBP/CHMP2A/GIT1/MYADM/NDEL1/TUBGCP6/GSN/TBCD/NUMA1/MID1IP1/SSH1/MET/PTK2B/SPTBN4/DBN1/RHOA/EVL/ESAM/VASP/PSTPIP1/CSNK1D/DCTN1/GOLGA2/PFN1/MSRB2/CHMP4B/SPTBN1/SSH3/CDC42EP2/CTTN/CDK5RAP2/BIN1/PINK1/TWF2/TTC17/HCLS1/CORO1A/HCK/ARPC1B/CDC42EP4/ARL2/DBNL/SNCA/TUBGCP2/GRB2/ADD1/COTL1/TMOD1/PAK1/NCKAP1L/PYCARD/SPTAN1/ARPC4/FLII/CAPZB/CYFIP2/FES/NDE1/WAS/SSH2/CORO7/DIAPH1
GO:0071826	BP	ribonucleoprotein complex subunit organization	132	0.493678	1.62665	0.00298954	0.143315	0.128613	1804	tags=29%, list=13%, signal=25%	RPS27/SNRPG/RPL24/RPL5/RPL11/CLNS1A/PTGES3/DENR/RPS27L/RPL6/PSIP1/EIF3A/SLU7/ZFAND1/DDX1/RPL3/RPS14/STRAP/ZNHIT3/RPL13A/PTBP2/RPLP0/SNRPF/MCTS1/NUDT21/KIF5B/RPS28/RPS5/PRPF18/XRCC5/GEMIN6/COIL/SNRPD2/RPL23A/ISY1/MRPS7/CRNKL1/SRPK1
GO:0007599	BP	hemostasis	176	-0.440153	-1.62467	0.00316456	0.143315	0.128613	2313	tags=30%, list=17%, signal=25%	PAFAH2/SRC/SH2B3/PAPSS2/LMAN1/VKORC1/ST3GAL4/ADRA2B/CEACAM1/AVPR2/VWF/SERPINA10/USF1/MPL/PABPC4/SERPING1/ACTG1/VCL/FCER1G/TSPAN32/ACTB/EMILIN2/F5/HSPB1/GNA12/MYL9/ADORA2A/SRF/ANXA5/FLNA/PLCG2/GNAS/ALOX12/TREML1/VAV1/LYN/P2RX1/CSRP1/GATA1/FERMT3/FIBP/ZNF385A/PLAUR/NFE2/SYK/KRT1/WAS/GPI/MYH9/ITPK1/GP9/TLN1/SLC4A1
GO:0032102	BP	negative regulation of response to external stimulus	291	-0.418779	-1.62121	0.00358423	0.143315	0.128613	2073	tags=25%, list=16%, signal=22%	CEACAM1/SIRT2/GPATCH3/GIT1/HLA-F/METRNL/VSIG4/RNF26/MICB/FYN/MFHAS1/FAM3A/STAT2/IL10/OAS1/SIGIRR/USF1/RGMA/SERPING1/LTF/LILRA2/SEMA4B/DUSP3/ARRB2/CRK/PARP14/HLA-E/PADI2/AOAH/PLCG1/ALOX5/TTLL12/NLRX1/ADORA2A/ADA/TRAFD1/NFKB1/HLA-B/GSTP1/NR1D1/HCK/TRIM38/ALOX12/NOTCH1/PCBP2/LYN/SHARPIN/NPLOC4/LGALS9/FEM1A/HLA-A/TNFRSF1A/CST7/TNFRSF1B/TRIM21/ADAR/FURIN/KIR2DL4/RIN3/NLRP12/SEMA4D/NR1H2/SYK/KRT1/GBA/G…
GO:0030041	BP	actin filament polymerization	124	-0.459061	-1.60372	0.00288184	0.143315	0.128613	1455	tags=31%, list=11%, signal=28%	PTK2B/SPTBN4/DBN1/RHOA/EVL/ESAM/VASP/PSTPIP1/PFN1/MSRB2/SPTBN1/SSH3/CDC42EP2/CTTN/BIN1/TWF2/TTC17/HCLS1/CORO1A/HCK/ARPC1B/CDC42EP4/DBNL/GRB2/ADD1/COTL1/TMOD1/NCKAP1L/PYCARD/SPTAN1/ARPC4/FLII/CAPZB/CYFIP2/WAS/SSH2/CORO7/DIAPH1
GO:0030010	BP	establishment of cell polarity	104	-0.465973	-1.60307	0.00544959	0.143315	0.128613	1862	tags=35%, list=14%, signal=30%	JAM3/AMOTL2/PRKCZ/PAFAH1B1/CLASP1/STK11/NDEL1/GSN/NUMA1/MYO9A/PTK2B/CRKL/RHOA/HSP90AB1/CRK/DCTN1/TCIRG1/NSFL1C/GBF1/CDK5RAP2/LLGL1/FSCN1/SNX27/BRSK1/GSK3B/SLC9A3R1/FLOT2/PLEKHG3/MARK2/SIPA1L3/DOCK2/FAM89B/NDE1/SH3BP1/MYH9/MSN
GO:0008028	MF	monocarboxylic acid transmembrane transporter activity	38	-0.551297	-1.5973	0.00481928	0.143315	0.128613	2614	tags=37%, list=20%, signal=30%	SLC5A8/SLC43A3/SLC6A12/SLC16A12/CEACAM1/SLC5A6/SLC6A6/SLC26A6/SLC27A1/SLC16A5/SLC10A3/SLC9A3R1/SLC16A3/ABCC3
GO:0032271	BP	regulation of protein polymerization	147	-0.443968	-1.59499	0.00301205	0.143315	0.128613	1995	tags=32%, list=15%, signal=28%	TRIOBP/GIT1/MYADM/GSN/TBCD/NUMA1/SSH1/MET/PTK2B/SPTBN4/DBN1/RHOA/EVL/ESAM/VASP/DCTN1/PFN1/SPTBN1/SSH3/CDC42EP2/CTTN/CDK5RAP2/BIN1/PINK1/TWF2/HCLS1/CORO1A/HCK/ARPC1B/CDC42EP4/ARL2/DBNL/SNCA/GRB2/ADD1/COTL1/TMOD1/PAK1/NCKAP1L/PYCARD/SPTAN1/ARPC4/FLII/CAPZB/CYFIP2/FES/SSH2
GO:0008154	BP	actin polymerization or depolymerization	143	-0.446106	-1.59267	0.00307692	0.143315	0.128613	1455	tags=32%, list=11%, signal=29%	PPP1R9B/GSN/MICAL2/SSH1/PTK2B/SPTBN4/DBN1/RHOA/EVL/ESAM/VASP/PSTPIP1/PFN1/MSRB2/SPTBN1/SSH3/CDC42EP2/CTTN/BIN1/TWF2/TTC17/HCLS1/CORO1A/HCK/ARPC1B/CDC42EP4/DBNL/GRB2/ADD1/WDR1/CFL1/COTL1/TMOD1/NCKAP1L/PYCARD/SPTAN1/ARPC4/FLII/CAPZB/CYFIP2/MICAL1/WAS/SH3BP1/SSH2/CORO7/DIAPH1
GO:0015629	CC	actin cytoskeleton	348	-0.402735	-1.58862	0.0037037	0.143315	0.128613	1547	tags=24%, list=12%, signal=22%	ACTG1/MYO9A/VCL/APBB3/ABLIM1/CYBA/PVALB/SPTBN4/DBN1/ACTB/CRK/VASP/BIN3/PSTPIP1/RCSD1/FHOD1/FKBP15/MYL4/DCTN3/ACTA2/LCP1/SPTBN1/CTTN/MYL9/BIN1/MSRA/LLGL1/PXN/FLNA/NCOA5/TAOK2/RAC2/CLDN5/CNN2/FSCN1/TWF2/TTC17/HCLS1/CORO1A/HCK/CTNNA1/ARPC1B/CDC42EP4/VPS18/DBNL/SNCA/SLC9A3R1/PDLIM1/TAX1BP3/FLOT2/ADAM8/MARK2/ADD1/LASP1/WDR1/CFL1/SIPA1L3/COTL1/MYO1G/FERMT3/TMOD1/PAK1/PARVG/SPTAN1/ACTR1A/ARPC4/FHL3/FLII…
GO:0030832	BP	regulation of actin filament length	114	-0.455636	-1.58399	0.00561798	0.143315	0.128613	1455	tags=31%, list=11%, signal=28%	PTK2B/SPTBN4/DBN1/RHOA/EVL/ESAM/VASP/PFN1/SPTBN1/SSH3/CDC42EP2/CTTN/BIN1/TWF2/HCLS1/CORO1A/HCK/ARPC1B/CDC42EP4/DBNL/GRB2/ADD1/WDR1/COTL1/TMOD1/NCKAP1L/PYCARD/SPTAN1/ARPC4/FLII/CAPZB/CYFIP2/WAS/SH3BP1/SSH2
GO:0042692	BP	muscle cell differentiation	234	-0.418446	-1.58151	0.00338983	0.143315	0.128613	1592	tags=18%, list=12%, signal=16%	ACTG1/SKI/BCL9/CTDP1/CDK9/ARRB2/BIN3/KEL/IL4R/MYOM2/DYRK1B/YY1/SUPT6H/FZD7/MYL9/SRF/BIN1/PTBP1/NOTCH1/NINJ1/CSRP1/CALR/WDR1/TMOD1/TNFSF14/SORT1/EHD1/FLII/RBM38/GPX1/RARA/SLC9A1/CFLAR/FLOT1/MYH9/MEGF10/ACTN4/FOXO4/G6PD/LMNA/ACTN1/DYSF
GO:1902622	BP	regulation of neutrophil migration	38	-0.544711	-1.57822	0.00481928	0.143315	0.128613	1849	tags=42%, list=14%, signal=36%	RAC1/JAM3/MOSPD2/FUT7/MYD88/CD99/TIRAP/CD99L2/CD74/RAC2/DAPK2/ADAM8/NCKAP1L/C5AR1/RHOG/MPP1
GO:0009060	BP	aerobic respiration	117	0.4854	1.57607	0.00470219	0.143315	0.128613	1949	tags=32%, list=15%, signal=28%	COX7C/NDUFA4/UQCRQ/NDUFB3/COX7A2/NDUFB2/NDUFS4/NDUFA1/NDUFS5/MDH1/NDUFAB1/SDHD/NDUFB5/CHCHD2/UQCRC2/DNAJC15/MYC/HIF1A/SUCLG2/PARK7/DLD/GHITM/BNIP3/ATP7A/BID/SUCLA2/UQCRB/DLAT/BLOC1S1/CAT/MTFR1/UQCRH/SUCLG1/NDUFV2/PDE12/COX6A1/IDH1/UQCRFS1
GO:0007596	BP	blood coagulation	171	-0.42619	-1.57579	0.00308642	0.143315	0.128613	2313	tags=30%, list=17%, signal=25%	PIK3CG/GP6/PAFAH2/SRC/SH2B3/PAPSS2/LMAN1/VKORC1/ST3GAL4/ADRA2B/CEACAM1/VWF/SERPINA10/USF1/MPL/PABPC4/SERPING1/ACTG1/VCL/FCER1G/TSPAN32/ACTB/EMILIN2/F5/HSPB1/GNA12/MYL9/ADORA2A/SRF/ANXA5/FLNA/PLCG2/GNAS/ALOX12/TREML1/VAV1/LYN/P2RX1/CSRP1/GATA1/FERMT3/FIBP/PLAUR/SYK/KRT1/WAS/MYH9/ITPK1/GP9/TLN1/SLC4A1
GO:0050817	BP	coagulation	174	-0.424846	-1.57131	0.00316456	0.143315	0.128613	2313	tags=29%, list=17%, signal=24%	PIK3CG/GP6/PAFAH2/SRC/SH2B3/PAPSS2/LMAN1/VKORC1/ST3GAL4/ADRA2B/CEACAM1/VWF/SERPINA10/USF1/MPL/PABPC4/SERPING1/ACTG1/VCL/FCER1G/TSPAN32/ACTB/EMILIN2/F5/HSPB1/GNA12/MYL9/ADORA2A/SRF/ANXA5/FLNA/PLCG2/GNAS/ALOX12/TREML1/VAV1/LYN/P2RX1/CSRP1/GATA1/FERMT3/FIBP/PLAUR/SYK/KRT1/WAS/MYH9/ITPK1/GP9/TLN1/SLC4A1
GO:0031589	BP	cell-substrate adhesion	268	-0.411175	-1.56854	0.00352113	0.143315	0.128613	2450	tags=24%, list=18%, signal=20%	ITGAX/JAM3/PARVB/DOCK5/PRKCZ/SRC/EPHA1/CLASP1/PTPRA/JUP/VWF/TRIOBP/TRIP6/RCC2/MYADM/ITGB5/TBCD/S100A10/MEGF9/ACTG1/VCL/PTK2B/CRKL/RHOA/DUSP3/CRK/TESK1/LYPD3/CD63/RRAS/FZD7/CTTN/SPOCK2/SRF/P4HB/PXN/FLNA/TAOK2/RAC2/DISC1/HOXD3/DAB2/CORO1A/NOTCH1/GSK3B/ARL2/PPM1F/DDR1/CALR/ITGB2/ITGB7/MYO1G/FERMT3/ITGAM/UNC13D/PARVG/CD3E/ITGAL/ITGA2B/SLC9A1/ITGA5/DNM2/ACTN4/ZYX/ACTN1
GO:0051146	BP	striated muscle cell differentiation	173	-0.42384	-1.56733	0.0031348	0.143315	0.128613	1592	tags=18%, list=12%, signal=17%	ACTG1/SKI/BCL9/CTDP1/ARRB2/BIN3/KEL/IL4R/MYOM2/DYRK1B/YY1/FZD7/MYL9/SRF/NOTCH1/CSRP1/CALR/WDR1/TMOD1/TNFSF14/SORT1/EHD1/FLII/RBM38/GPX1/RARA/SLC9A1/CFLAR/FLOT1/MYH9/G6PD/LMNA
GO:0005912	CC	adherens junction	118	-0.449551	-1.567	0.00555556	0.143315	0.128613	2133	tags=27%, list=16%, signal=23%	CDH9/CEACAM1/JUP/PPP1R9B/TBCD/PAK4/VCL/ANXA2/SPTBN4/ACTB/ESAM/CD99L2/NDRG1/TNK2/CTNNA1/CDC42EP4/NOTCH1/LYN/PDLIM1/TSPAN33/FLOT2/ADD1/S100A11/PPP1CA/PIP5K1C/SH3BP1/PDLIM7/FLOT1/MYH9/MSN/ZYX/TLN1
GO:0050920	BP	regulation of chemotaxis	157	-0.429139	-1.56137	0.003125	0.143315	0.128613	1479	tags=19%, list=11%, signal=17%	MET/PTK2B/SEMA4B/DUSP3/STX4/HSPB1/PADI2/IL6R/CD74/RAC2/DAPK2/NOTCH1/PPM1F/LYN/LGALS9/CALR/CSF1R/NCKAP1L/GPSM3/TNFSF14/PRKD2/RIN3/SEMA4D/DSCAM/SPI1/C5AR1/WNK1/MAPK3/MPP1/SEMA4A
GO:0006396	BP	RNA processing	677	0.410734	1.55835	0.00121655	0.143315	0.128613	2014	tags=27%, list=15%, signal=24%	RPL26/RPS24/RPS17/MBNL1/RPS27/SNRPG/RPL7/RPL10A/RPL27/RPL5/SLC38A2/LSM3/RPL35/RBM25/RPL35A/LSM1/PAPOLA/RPS25/ZMPSTE24/RPL11/RPS6/RPS21/CLK4/CLNS1A/SNORD13/ZFP36L1/HNRNPC/DHX15/PCF11/SSB/LSM5/PSIP1/THOC7/RBM12B/SLU7/RBM15/PAN3/CDC40/SMNDC1/FRG1/RIOK2/RNGTT/DDX1/WDR75/NGDN/PLRG1/RPS14/LSM7/METTL5/HSPA8/INTS8/PNN/TFB2M/RPS13/NOL11/PPWD1/LARP7/STRAP/ZNHIT3/WBP4/SNRPB2/CWF19L2/PUM2/PPP2CA/EMG1/RBM17/P…
GO:0003729	MF	mRNA binding	215	0.450311	1.55594	0.00290276	0.143315	0.128613	1405	tags=24%, list=11%, signal=22%	RPL26/RPS3A/RPL7/RPL24/RPL5/RPL35/RBM25/ANGEL2/ZFP36L1/EIF4G2/HNRNPC/DENR/PCF11/SSB/CRYZ/MRPL13/G3BP2/EIF2A/EIF3A/RBM15/CDC40/GNL3/SERBP1/RPS14/LSM14A/RPS13/YTHDF3/PURB/STRAP/PUM2/RPL13A/PTBP2/KHDRBS1/HNRNPA0/PARK7/GRSF1/UPF3B/NUDT21/G3BP1/TIA1/FXR1/DHX36/CSTF2T/RPS5/CNBP/TIAL1/TDRD7/NCBP2/SRBD1/EXOSC8/DDX5/FUBP3
GO:0050792	BP	regulation of viral process	130	-0.437971	-1.55021	0.00291545	0.143315	0.128613	1829	tags=28%, list=14%, signal=25%	VPS4A/GSN/IFITM3/OAS1/EIF2AK2/ISG20/LARP1/LTF/MX1/DDB1/TRIM8/PARP10/TRIM11/OASL/TBC1D20/P4HB/CD74/FCN1/TRIM38/IFITM2/NOTCH1/APOBEC3C/CD4/TRIM25/LY6E/LGALS9/SETDB1/TRIM21/ADAR/TRIM28/TNIP1/ZNFX1/RAD23A/TRIM26/VPS37B/KPNA6/HLA-DRB1
GO:0050878	BP	regulation of body fluid levels	286	-0.401993	-1.54934	0.00358423	0.143315	0.128613	2404	tags=25%, list=18%, signal=21%	GP6/ZBTB7B/TMEM79/PAFAH2/SRC/SH2B3/PAPSS2/LMAN1/VKORC1/ST3GAL4/ADRA2B/CEACAM1/AVPR2/VWF/SERPINA10/AKR1B1/USF1/MPL/PABPC4/SERPING1/ACTG1/EXT1/VCL/CYBA/MET/FCER1G/TSPAN32/ACTB/ELOVL1/NCOR2/EMILIN2/F5/HSPB1/GNA12/APRT/MTX1/MYL9/STAT5B/ADORA2A/SRF/ADA/ANXA5/FLNA/PLCG2/GNAS/ALOX12/TREML1/VAV1/LYN/P2RX1/COPA/CSRP1/DDR1/GATA1/FERMT3/STAT5A/FIBP/ZNF385A/PLAUR/NFE2/NR1H2/SYK/KRT1/GNAI2/GBA/WNK1/WAS/GPI/MY…
GO:0030036	BP	actin cytoskeleton organization	506	-0.380495	-1.54699	0.00469484	0.143315	0.128613	1832	tags=24%, list=14%, signal=21%	ITGB5/VPS4A/PPP1R9B/GSN/ARHGAP26/MICAL2/S100A10/PHPT1/SH3KBP1/SSH1/ACTG1/EPB41/MET/PTK2B/SPTBN4/ARRB1/DBN1/RHOA/EVL/ACTB/ESAM/CRK/PDPK1/VASP/BIN3/TESK1/ARHGEF18/PSTPIP1/TYROBP/IKBKB/PLEK2/RHOF/FHOD1/NISCH/MYOM2/NRK/TAOK1/ABI3/PFN1/LCP1/MSRB2/PACSIN2/SPTBN1/SSH3/CDC42EP2/CLN3/CTTN/MYL9/PTPN1/SRF/BIN1/LLGL1/PXN/FLNA/TAOK2/RAC2/MARCKSL1/CNN2/FSCN1/TWF2/TTC17/HCLS1/CORO1A/KCTD13/HCK/CTNNA1/ARPC1B/CDC…
GO:0007163	BP	establishment or maintenance of cell polarity	157	-0.425159	-1.54689	0.003125	0.143315	0.128613	1862	tags=27%, list=14%, signal=23%	STK11/NDEL1/GSN/NUMA1/MYO9A/PTK2B/CRKL/RHOA/ACTB/HSP90AB1/CRK/RHOF/DCTN1/TCIRG1/NSFL1C/GBF1/CDK5RAP2/LLGL1/RAC2/FSCN1/SNX27/BRSK1/CTNNA1/GSK3B/SLC9A3R1/PDLIM1/FLOT2/PLEKHG3/MARK2/WDR1/SIPA1L3/DOCK2/PARVG/NCKAP1L/FAM89B/SLC9A1/NDE1/SH3BP1/MYH9/MSN/RHOG/LMNA
GO:0045055	BP	regulated exocytosis	177	-0.417293	-1.54168	0.00315457	0.143315	0.128613	2621	tags=37%, list=20%, signal=30%	STX2/CDK5/HYAL3/CHRNB3/SV2A/LAT2/PIK3CG/GIPC1/TMEM79/STX1A/ZP3/RAB11FIP5/CEACAM1/GAB2/FBXL20/SDF4/GIT1/HLA-F/CADPS/CD84/HMOX1/RIMS4/AP1G1/CD300A/PDPK1/SPHK2/STX4/P2RX7/IL4R/DNAJC5/LAT/ADORA2A/RAC2/NKG7/CORO1A/HCK/VPS18/NOTCH1/CALM3/GSK3B/SNCA/LYN/P2RX1/CBL/LGALS9/VAMP2/GATA1/ITGB2/ITGAM/UNC13D/NCKAP1L/PTGDS/NAPA/LAMP1/PIP5K1C/PTAFR/SPI1/SYK/FES/MICAL1/GNAI2/PRAM1/MYH9/PIK3CD/STXBP2
GO:0031267	MF	small GTPase binding	211	-0.408692	-1.52983	0.0031746	0.143315	0.128613	2655	tags=36%, list=20%, signal=29%	EVI5L/HPS6/GGA3/ANKFY1/RILP/YIPF1/AKAP13/CDC42SE1/FGD2/DOCK5/TBC1D13/IPO4/HACE1/GAPVD1/RAB11FIP5/ARFIP2/INF2/ARHGDIB/GGA2/TNPO1/SGSM2/SGSM3/TRIOBP/IPO9/RCC2/GCC1/LZTR1/RIN1/SYTL1/TMEM127/RIMS4/STK19/AP1G1/SPHK2/ULK1/IPO13/PFN1/RALBP1/CDC42EP2/NDRG1/TBC1D20/RANGAP1/FLNA/RAPGEF6/DVL3/GDI1/TNPO2/KCTD13/CDC42EP4/TSC2/XPO7/RAB8A/FGD3/SYTL3/ARHGEF2/EVI5/FMNL1/DOCK2/PAK1/UNC13D/TNPO3/ARHGAP1/RABGAP1/RIN…
GO:0051020	MF	GTPase binding	233	-0.403967	-1.529	0.00330033	0.143315	0.128613	2655	tags=35%, list=20%, signal=29%	EVI5L/HPS6/GGA3/ANKFY1/RILP/YIPF1/AKAP13/CDC42SE1/FGD2/CLTA/DOCK5/TBC1D13/IPO4/HACE1/GAPVD1/RAB11FIP5/ARFIP2/INF2/ARHGDIB/GGA2/TNPO1/SGSM2/SGSM3/TRIOBP/IPO9/RCC2/GCC1/LZTR1/RIN1/SYTL1/TMEM127/RIMS4/STK19/AP1G1/SPHK2/ULK1/IPO13/PFN1/RALBP1/LCP1/SPTBN1/CDC42EP2/NDRG1/TBC1D20/RANGAP1/BIN1/FLNA/RAPGEF6/DVL3/GDI1/TNPO2/KCTD13/CDC42EP4/TSC2/XPO7/RAB8A/FGD3/SYTL3/GNB2/ARHGEF2/EVI5/FMNL1/DOCK2/PAK1/UNC13…
GO:0007015	BP	actin filament organization	310	-0.392618	-1.52339	0.0035461	0.143315	0.128613	2307	tags=30%, list=17%, signal=25%	SRC/EPHA1/ARF1/ALMS1/ARPC1A/ARFIP2/TPM4/CORO1B/CLASP1/GAS7/PICK1/TRIOBP/MYADM/ITGB5/PPP1R9B/GSN/MICAL2/S100A10/SH3KBP1/SSH1/ACTG1/MET/PTK2B/SPTBN4/ARRB1/DBN1/RHOA/EVL/ESAM/VASP/BIN3/TESK1/ARHGEF18/PSTPIP1/RHOF/FHOD1/PFN1/LCP1/MSRB2/SPTBN1/SSH3/CDC42EP2/CTTN/SRF/BIN1/PXN/FLNA/RAC2/MARCKSL1/FSCN1/TWF2/TTC17/HCLS1/CORO1A/KCTD13/HCK/CTNNA1/ARPC1B/CDC42EP4/HIP1/DBNL/PPM1F/PDLIM1/GRB2/ADD1/ARHGEF2/WDR1…
GO:0019866	CC	organelle inner membrane	368	0.41854	1.52083	0.00135501	0.143315	0.128613	2493	tags=33%, list=19%, signal=28%	COX7C/NDUFA4/UQCRQ/NDUFB3/COX7A2/TMEM126B/LEMD3/NDUFB2/NDUFS4/COX7B/NDUFA1/LDHB/ZMPSTE24/NDUFS5/PTGS2/MRPS18C/TMEM126A/CRLS1/MRPL32/MRPL50/HIGD1A/SIRT1/MRPL3/NDUFAB1/ATP11B/COX6C/SDHD/TOR1AIP1/MRPS22/ABCB10/MRPL13/MRPL33/MRPL51/MRPS31/MRPS33/MRPL15/UNC50/COQ5/MRPL22/NDUFB5/MTX2/MRPS35/OMA1/COQ2/MATR3/GRPEL2/MRPS21/COQ10B/UQCRC2/PMPCB/DNAJC15/MRPS28/MRPL39/MRPL36/GHITM/LGALS3/MRPL1/MRPL48/DPY19L1/…
GO:0050921	BP	positive regulation of chemotaxis	106	-0.439964	-1.52064	0.00546448	0.143315	0.128613	1611	tags=21%, list=12%, signal=18%	TIRAP/MET/PTK2B/STX4/HSPB1/IL6R/CD74/RAC2/DAPK2/PPM1F/LGALS9/CALR/CSF1R/NCKAP1L/GPSM3/TNFSF14/PRKD2/DSCAM/SPI1/C5AR1/WNK1/MAPK3
GO:0034660	BP	ncRNA metabolic process	385	0.413335	1.51413	0.0013245	0.143315	0.128613	2236	tags=27%, list=17%, signal=23%	RPL26/RPS24/RPS17/RPS27/RPL7/RPL10A/RPL27/RPL5/RPL35/RPL35A/RPS25/ZMPSTE24/RPL11/RPS6/RPS21/XRN1/SSB/FRG1/RIOK2/DDX1/WDR75/NGDN/RPS14/METTL5/INTS8/TFB2M/GTF3A/NOL11/LARP7/ZNHIT3/PUM2/EMG1/UTP14C/TSNAX/SBDS/WDR36/GRSF1/DDX21/DDX18/PRKRA/MRPL1/UTP6/RBM7/USPL1/METTL4/GTF3C3/RPS28/NOL8/EXOSC1/GTPBP4/GTF2H5/RPAP2/RPL7A/TDRD7/WDR12/INTS2/EXOSC8/RRP15/EXOSC3/DDX5/RPL14/BCDIN3D/MAP2K1/TYW3/DICER1/TARBP1/…
GO:0032535	BP	regulation of cellular component size	257	-0.396287	-1.51323	0.00342466	0.143315	0.128613	1455	tags=23%, list=11%, signal=21%	PTK2B/SPTBN4/SEMA4B/DBN1/RHOA/EVL/HSP90AB1/ESAM/VASP/SLC12A9/KEL/ULK1/P2RX7/PFN1/SIN3A/SPTBN1/SSH3/CDC42EP2/CLN3/CTTN/PPP1R15A/SRF/BIN1/DISC1/TWF2/HCLS1/GDI1/CORO1A/HCK/ARHGAP4/ARPC1B/CDC42EP4/GSK3B/DBNL/VAV1/SLC9A3R1/GRB2/ADD1/WDR1/TRPV2/COTL1/TMOD1/NCKAP1L/PYCARD/SPTAN1/RIN3/ARPC4/SEMA4D/PPP1CA/DSCAM/FLII/CAPZB/CYFIP2/WAS/SH3BP1/SSH2/MSN/DNM2/AP2M1/SEMA4A
GO:0072593	BP	reactive oxygen species metabolic process	172	-0.408085	-1.50903	0.00311526	0.143315	0.128613	1815	tags=29%, list=14%, signal=26%	FYN/GPX3/TP53/TRAP1/NOXO1/MPV17/PRDX5/NCF1B/CYBA/PTK2B/PDK3/RHOA/CDKN1A/SPHK2/TYROBP/P2RX7/DCXR/ABCD1/ALOX5/GBF1/RAC2/CCS/HDAC6/PINK1/GSTP1/PLCG2/IFI6/ALOX12/RIPK1/VAV1/SNCA/TSPO/GRB2/ITGB2/ITGAM/AATF/HBD/HBD/NCF4/NCF1/HBZ/SYK/GNAI2/NCF1C/GPX1/CFLAR/HBE1/HBM/FOXO3/G6PD/HBQ1
GO:0050900	BP	leukocyte migration	288	-0.390685	-1.50853	0.00361011	0.143315	0.128613	2173	tags=27%, list=16%, signal=23%	ST3GAL4/CCL23/ZNF580/AGER/IL27RA/B4GALT1/IL1B/TREM1/PLVAP/ARTN/FUT7/MYD88/FYN/CD99/IL10/HMOX1/TIRAP/EXT1/FCER1G/PTK2B/CRKL/RHOA/CRK/CD300A/PECAM1/BDKRB1/CD99L2/PADI2/ALOX5/GBF1/STAT5B/IL6R/ADA/CXCL16/CD74/RAC2/DAPK2/CORO1A/HCK/BSG/VAV1/LYN/SELPLG/NINJ1/ADAM8/LGALS9/CALR/WDR1/ITGB2/SELL/ITGB7/MYO1G/CSF1R/NCKAP1L/GPSM3/TNFSF14/PYCARD/RIN3/NLRP12/STK10/PIP5K1C/PTAFR/ITGAL/SPI1/SYK/GBA/C5AR1/WNK1/MAP…
GO:0002573	BP	myeloid leukocyte differentiation	163	-0.410038	-1.50777	0.00302115	0.143315	0.128613	1521	tags=21%, list=11%, signal=19%	ANXA2/LTF/RELB/LTBR/GAB3/CEBPA/TYROBP/TCIRG1/CD74/ACIN1/HCLS1/ZFPM1/CD4/RIPK1/THOC5/LYN/FASN/TCTA/SBNO2/GATA1/CSF1R/LILRB3/ATP6AP1/OSCAR/EIF2AK1/GPR137/SPI1/FES/GBA/RARA/MYH9/TESC/PIK3CD/HLA-DRB1/MMP9
GO:0097191	BP	extrinsic apoptotic signaling pathway	180	-0.404152	-1.50408	0.0030581	0.143315	0.128613	1480	tags=21%, list=11%, signal=19%	TRADD/LTBR/PDPK1/STX4/P2RX7/BAX/TMBIM1/BOK/PSME3/CTTN/SIAH2/IL6R/RELA/GSTP1/IFI6/CTNNA1/DAXX/GSK3B/DEDD2/RIPK1/TNFRSF10C/ARHGEF2/GATA1/TNFRSF1A/TNFRSF1B/IFI27/RBCK1/PYCARD/SORT1/PPP2R1A/PPP1CA/SPI1/MKNK2/GPX1/CFLAR/BCL2L1/FOXO3/LMNA
GO:0030099	BP	myeloid cell differentiation	294	-0.388152	-1.50345	0.00355872	0.143315	0.128613	1699	tags=23%, list=13%, signal=21%	ERCC2/MPL/PABPC4/SLC25A38/TIRAP/ANXA2/LTF/RELB/PTK2B/KLF2/LTBR/GAB3/CEBPA/TYROBP/EP300/KLF13/PKNOX1/TCIRG1/ZBTB7A/STAT5B/SRF/CD74/KLF1/ACIN1/HIPK2/HCLS1/ZFPM1/NBEAL2/CD4/RIPK1/THOC5/LYN/FASN/TCTA/SBNO2/WDR1/GATA1/CSF1R/ZNF385A/NCKAP1L/LILRB3/ADAR/PAF1/ITPKB/IKZF1/ATP6AP1/OSCAR/EIF2AK1/GPR137/SPI1/NFKBIA/FES/GBA/RARA/STAT3/MYH9/TRIM58/TESC/PIK3CD/EPB42/CSF3R/WASF2/FOXO3/G6PD/HLA-DRB1/MMP9/SLC4A1/A…
GO:0030029	BP	actin filament-based process	561	-0.366206	-1.50085	0.00492611	0.143315	0.128613	2442	tags=27%, list=18%, signal=23%	JAM3/FGD2/ELMO2/PARVB/SIPA1L1/PGM5/AMOTL2/SRC/EPHA1/ARF1/ALMS1/PAFAH1B1/GJC1/ARPC1A/ARFIP2/TPM4/CORO1B/CLASP1/INF2/GAS7/ARHGDIB/JUP/PICK1/TRIOBP/ATP1A1/MYADM/NUAK2/ITGB5/VPS4A/PPP1R9B/GSN/ARHGAP26/MICAL2/MYBPC3/S100A10/PHPT1/SH3KBP1/SSH1/ACTG1/EPB41/MET/PTK2B/SPTBN4/ARRB1/DBN1/RHOA/EVL/ACTB/ESAM/CRK/PDPK1/VASP/BIN3/TESK1/ARHGEF18/PSTPIP1/TYROBP/IKBKB/PLEK2/RHOF/FHOD1/NISCH/MYOM2/NRK/TAOK1/ABI3/PF…
GO:0005911	CC	cell-cell junction	326	-0.383919	-1.49944	0.00367647	0.143315	0.128613	2148	tags=22%, list=16%, signal=19%	CLDN14/CDH9/B4GALT1/CEACAM1/JUP/SIRT2/SGSM3/MYADM/FGFRL1/PPP1R9B/TBCD/PAK4/SH3KBP1/ACTG1/VCL/ANXA2/UBN1/SPTBN4/DBN1/RHOA/ACTB/ESAM/VASP/P2RX7/FHOD1/PECAM1/CD99L2/PACSIN2/LAT/NDRG1/OCEL1/PXN/FLNA/PANX2/CLDN5/TNK2/CNN2/FSCN1/CORO1A/CTNNA1/CDC42EP4/NOTCH1/VAV1/LYN/PDLIM1/TSPAN33/FLOT2/GRB2/ADD1/S100A11/ARHGEF2/WDR1/SIPA1L3/PAK1/CD3E/MAP2K2/CSK/STARD10/PPP1CA/PIP5K1C/SLC9A1/ITGA5/WAS/SH3BP1/PDLIM7/FL…
GO:0034329	BP	cell junction assembly	266	-0.390508	-1.49242	0.00346021	0.143315	0.128613	2479	tags=23%, list=19%, signal=19%	AGRN/JAM3/COLQ/RAMP2/SRC/GJC1/CLSTN1/CLASP1/CLDN14/CDH9/PTPRA/PLXND1/JUP/EIF4G1/TRIP6/IL1B/PCDHB9/RCC2/TBCD/S100A10/ZDHHC12/LRFN3/ACTG1/MYO9A/VCL/PTK2B/CRKL/RHOA/ACTB/ESAM/DUSP3/RAPGEF1/IKBKB/PECAM1/ABI3/CTTN/SPOCK2/OCEL1/SRF/TAOK2/SLITRK1/CLDN5/FSCN1/CTNNA1/GPC6/ARL2/DBNL/PPM1F/SNCA/GPBAR1/WDR1/SEMA4D/PIP5K1C/DSCAM/SLC9A1/ITGA5/SH3BP1/FLOT1/SEMA4A/TLN1/ACTN1
GO:0005743	CC	mitochondrial inner membrane	329	0.414101	1.49204	0.00276243	0.143315	0.128613	2493	tags=33%, list=19%, signal=27%	COX7C/NDUFA4/UQCRQ/NDUFB3/COX7A2/TMEM126B/NDUFB2/NDUFS4/COX7B/NDUFA1/LDHB/NDUFS5/MRPS18C/TMEM126A/CRLS1/MRPL32/MRPL50/HIGD1A/MRPL3/NDUFAB1/COX6C/SDHD/MRPS22/ABCB10/MRPL13/MRPL33/MRPL51/MRPS31/MRPS33/MRPL15/COQ5/MRPL22/NDUFB5/MTX2/MRPS35/OMA1/COQ2/GRPEL2/MRPS21/COQ10B/UQCRC2/PMPCB/DNAJC15/MRPS28/MRPL39/MRPL36/GHITM/LGALS3/MRPL1/MRPL48/MRPL45/SLC25A13/RSAD2/MRPS30/MRPL17/MRPL18/TTC19/MTX3/CHCHD1/TI…
GO:0046777	BP	protein autophosphorylation	174	-0.402927	-1.49024	0.00316456	0.143315	0.128613	1993	tags=29%, list=15%, signal=25%	MAP3K12/ENG/AATK/STK11/CALM1/FYN/ATP13A2/EPHA8/MAPKAPK2/EIF2AK2/PTK2B/CLK3/PDPK1/TESK1/IRAK1/ULK1/TAOK1/DYRK1B/EIF2AK4/TAOK2/MAPKAPK3/PINK1/PPP2R5B/DAPK2/HCK/CALM3/GSK3B/RIPK1/MAP4K1/LYN/PIM1/DDR1/MARK2/PIM2/MAP3K3/PAK1/CSF1R/PRKD2/MAP2K2/AAK1/TRIM28/CSK/NLRP12/STK10/EIF2AK1/SYK/FES/MAP3K11/MKNK2/MAPK3/MVP
GO:0019221	BP	cytokine-mediated signaling pathway	348	-0.377366	-1.48855	0.0037037	0.143315	0.128613	1852	tags=27%, list=14%, signal=24%	CCL23/AGPAT2/IL27RA/CEACAM1/LILRA5/LILRB2/IL1B/PLVAP/JAK1/MYD88/CRLF2/IFITM3/IFNAR1/STAT2/OAS1/SIGIRR/IL10RA/MPL/TP53/NKIRAS2/EXT1/IL2RB/CD300LF/IRF1/TRIM44/TRADD/MX1/FCER1G/ADIPOR2/PTK2B/TOLLIP/LILRA2/CEBPA/HSP90AB1/IRAK1/IKBKB/IL4R/IL18/SLC27A1/PARP14/TRIM41/CDC37/RPS6KA4/PADI2/OASL/ZBP1/PTPN1/STAT5B/IL6R/TTLL12/P4HB/IL2RG/PLP2/EIF5A/CD74/RELA/GSTP1/HCK/IKBKE/IFITM2/STAT6/NOTCH1/CD4/RIPK1/LAPTM…
GO:0060627	BP	regulation of vesicle-mediated transport	411	-0.367503	-1.47464	0.004	0.143315	0.128613	2091	tags=28%, list=16%, signal=25%	TPCN2/CEACAM1/GAB2/PICK1/NECAB2/CD151/RAB5C/FBXL20/CHMP2A/MFGE8/GIT1/IL1B/HLA-F/ARFGAP1/EHD4/PTPN23/VPS4A/CADPS/ATP13A2/ABCA7/CD84/WDR54/HMOX1/SIRPB1/IL2RB/SMPD1/CD300LF/DNAJC13/ANXA2/CYBA/FCER1G/LRPAP1/ARRB1/RIMS4/AP1G1/AP2B1/ARRB2/UNC119/CD300A/PDPK1/SPHK2/STX4/IL4R/TGM2/DNAJC5/AP2S1/GRIPAP1/CD63/PACSIN2/LDLRAP1/CLN3/SNX17/RAB4B/PTPN1/ADORA2A/TBC1D20/BIN1/IL2RG/ATXN2/RAC2/TNK2/CNN2/DAB2/PLCG2/C…
GO:0006897	BP	endocytosis	407	-0.367713	-1.47419	0.00398406	0.143315	0.128613	2091	tags=27%, list=16%, signal=23%	TPCN2/CEACAM1/PICK1/NECAB2/CD151/RAB5C/MFGE8/ARFGAP1/EHD4/LRP3/CD6/GSN/EPS15L1/ABCA7/ASGR1/CD320/IL10RA/CD5/AP2A2/MAPKAPK2/WDR54/SH3KBP1/RIN1/ACTG1/SMPD1/NECAP2/DNAJC13/ANXA2/TOM1/FCER1G/LRPAP1/SURF4/ARRB1/AP1G1/ACTB/AP2B1/ARRB2/UNC119/CD300A/BIN3/CD163/AP2A1/PSTPIP1/MARCO/AP2S1/PI4KB/FKBP15/RALBP1/CD63/PACSIN2/LDLRAP1/CLN3/CTTN/SNX17/RAB4B/PTPN1/BIN1/CXCL16/FNBP1/LRP10/ATXN2/RAC2/MAPKAPK3/REPS2/…
GO:0150034	CC	distal axon	183	-0.397713	-1.47349	0.0031746	0.143315	0.128613	2042	tags=23%, list=15%, signal=20%	SIRT2/MAP3K12/GIT1/NDEL1/PPP1R9B/IGHMBP2/ENO2/ACTG1/MYO9A/PTK2B/DBN1/ACTB/AP3D1/HSP90AB1/FKBP15/KATNB1/CTTN/RNF40/FXR2/BIN1/FLNA/TAOK2/NEO1/PINK1/FSCN1/DISC1/TWF2/BRSK1/ARHGAP4/CALM3/TPRG1L/GDPD5/SNCA/CBL/COPA/EXOC3/TRPV2/BASP1/AAK1/DSCAM/MICAL1/DNM2/ATP6V0D1
GO:0021700	BP	developmental maturation	197	-0.395197	-1.46988	0.0031746	0.143315	0.128613	1841	tags=19%, list=14%, signal=16%	ANKS1A/B4GALT5/DMC1/AKR1B1/EPHA8/ERCC2/EXT1/LTF/PTK2B/KLF2/SPTBN4/AP1G1/CEBPA/RHOA/AP3D1/SLC26A6/PFN1/CD63/ZBTB7A/DISC1/TRPC4AP/ABHD2/ROPN1L/REC8/ARCN1/AP1M1/ROPN1B/PPP2R1A/RERE/SEMA4D/LYL1/GBA/PHOSPHO1/TRIM58/EPB42/FOXO3/G6PD
GO:0005740	CC	mitochondrial envelope	539	0.392837	1.46868	0.00125471	0.143315	0.128613	2493	tags=32%, list=19%, signal=27%	COX7C/NDUFA4/TOMM7/UQCRQ/NDUFB3/RPS27A/COX7A2/TMEM126B/PPP1CC/NDUFB2/NDUFS4/COX7B/NDUFA1/LDHB/NDUFS5/MRPS18C/TMEM14B/TMEM126A/RPS6KB1/CRLS1/MRPL32/MRPL50/HIGD1A/OGT/BNIP3L/MRPL3/RHOT1/NDUFAB1/COX6C/SLC44A1/SDHD/TOMM20/MRPS22/ABCB10/MRPL13/PNPLA8/ATAD1/MRPL33/SLC25A46/MRPL51/MRPS31/MRPS33/MRPL15/COX17/COQ5/MRPL22/NDUFB5/MTX2/MRPS35/OMA1/COQ2/GOLPH3/ACADM/ACSL4/GRPEL2/MRPS21/COQ10B/CHCHD2/UQCRC2/PM…
GO:0071695	BP	anatomical structure maturation	163	-0.399313	-1.46833	0.00302115	0.143315	0.128613	2046	tags=20%, list=15%, signal=17%	PICK1/SIRT2/ANKS1A/B4GALT5/DMC1/AKR1B1/EPHA8/ERCC2/EXT1/LTF/PTK2B/KLF2/SPTBN4/CEBPA/RHOA/SLC26A6/ZBTB7A/TRPC4AP/ABHD2/ROPN1L/REC8/ARCN1/ROPN1B/PPP2R1A/RERE/SEMA4D/LYL1/GBA/PHOSPHO1/TRIM58/EPB42/FOXO3/G6PD
GO:0008092	MF	cytoskeletal protein binding	700	-0.353736	-1.46684	0.00564972	0.143315	0.128613	2231	tags=25%, list=17%, signal=22%	ARPC1A/RAB11FIP5/TPM4/CLSTN1/CORO1B/KIFC2/IPP/CLASP1/GABARAPL1/INF2/GAS7/CCDC69/NEIL2/KIF1B/MARK3/B4GALT1/CEACAM1/S100A4/PICK1/CORO2A/TRIOBP/GIT1/RCC2/SPC24/MAP1LC3A/CALM1/NDEL1/REEP4/PPP1R9B/FYN/TUBGCP6/GSN/MICAL2/TBCD/NUMA1/MYBPC3/KLC3/TTLL4/RUSC1/RGS14/SSH1/EPB41/STUB1/MYO9A/VCL/FXYD5/ANXA2/ABLIM1/MX1/SPTBN4/AP1G1/DBN1/RHOA/EVL/ACTB/HSP90AB1/DUSP3/CRK/VASP/PSTPIP1/RCSD1/EP300/FHOD1/DCTN1/ATF5/…
GO:0002263	BP	cell activation involved in immune response	237	-0.387586	-1.46542	0.00344828	0.143315	0.128613	1470	tags=31%, list=11%, signal=28%	IL27RA/LFNG/CEACAM1/GAB2/SLC15A4/HLA-F/ZNF683/NFKBID/MYD88/IL10/TP53/CD84/HMOX1/FCER1G/RELB/PTK2B/LILRA2/AP1G1/CD300A/PDPK1/SPHK2/STX4/TYROBP/IL4R/IL18/TICAM1/LCP1/SUPT6H/LAT/EIF2AK4/GBF1/IL6R/ADA/CD74/RAC2/NKG7/PLCG2/CORO1A/STAT6/ZFPM1/LYN/CBL/LGALS9/SBNO2/ST3GAL1/VAMP2/GATA1/ITGB2/BCL3/IFI35/ITGAM/DOCK2/UNC13D/NCKAP1L/PTGDS/HLX/PYCARD/LAMP1/PTAFR/ITGAL/SPI1/SYK/FES/RARA/STAT3/PRAM1/GRN/PIK3CD/A…
GO:0030141	CC	secretory granule	666	-0.354827	-1.46522	0.00561798	0.143315	0.128613	1805	tags=26%, list=14%, signal=24%	CADPS/GSN/LAIR1/ORMDL3/PTGES2/COMMD9/PA2G4/PGAM1/NFAM1/AP2A2/SIRPB1/SERPING1/SMPD1/ANXA11/EEF2/DNAJC13/VCL/ANXA2/LTF/TOM1/CYBA/ICA1/PCSK1N/FCER1G/ARSA/FTL/NEU1/TOLLIP/PSMD1/CSTB/SURF4/CLK3/ARHGAP9/RHOA/HSP90AB1/CD300A/STX4/APEH/TYROBP/NME2/F5/RHOF/GM2A/FOLR3/DNAJC5/PECAM1/TMBIM1/PDXK/APRT/IMPDH2/PADI2/FCGR2A/BRI3/CD63/TCIRG1/ALOX5/DPEP3/RAB4B/STK11IP/HLA-C/SLC2A3/ACAA1/PGM1/GUSB/CTSW/GLA/CTSZ/TME…
GO:0030027	CC	lamellipodium	156	-0.40485	-1.46422	0.00319489	0.143315	0.128613	1964	tags=29%, list=15%, signal=25%	GIT1/NRBP1/PPP1R9B/GSN/SPATA13/SSH1/ABLIM1/PTK2B/DBN1/RHOA/EVL/ACTB/VASP/TESK1/STX4/PSTPIP1/NME2/PLEK2/ABI3/ACTA2/PLCG1/CTTN/P4HB/PXN/RAC2/FSCN1/TWF2/CORO1A/CTNNA1/DBNL/FGD3/FLOT2/CFL1/MYO1G/PAK1/INPPL1/CAPZB/FAM89B/SLC9A1/SH3BP1/FLOT1/DNM2/TESC/APBB1IP/WASF2
GO:0030667	CC	secretory granule membrane	250	-0.385121	-1.46393	0.00341297	0.143315	0.128613	2531	tags=39%, list=19%, signal=32%	CCDC136/HYAL3/HLA-H/ALDH3B1/LAMP2/DDOST/ITPR3/ITGAX/KCNAB2/CD33/APLP2/DGAT1/CYB5R1/TSPAN14/MOSPD2/SIGLEC9/AGPAT2/B4GALT1/CEACAM1/FCGR3B/RAB5C/LILRB2/SLC15A4/MFGE8/MAGT1/DOK3/CADPS/LAIR1/ORMDL3/NFAM1/AP2A2/SIRPB1/DNAJC13/TOM1/CYBA/ICA1/FCER1G/SURF4/RHOA/CD300A/TYROBP/RHOF/DNAJC5/PECAM1/TMBIM1/FCGR2A/BRI3/CD63/TCIRG1/RAB4B/HLA-C/SLC2A3/TMEM63A/NCSTN/SLC44A2/GAA/TMC6/SIGLEC5/HLA-B/CEACAM3/PSAP/TBC1D…
GO:0002366	BP	leukocyte activation involved in immune response	234	-0.38556	-1.45722	0.00338983	0.143315	0.128613	1470	tags=31%, list=11%, signal=28%	IL27RA/LFNG/CEACAM1/GAB2/SLC15A4/HLA-F/ZNF683/NFKBID/MYD88/IL10/TP53/CD84/HMOX1/FCER1G/RELB/PTK2B/LILRA2/AP1G1/CD300A/PDPK1/SPHK2/STX4/TYROBP/IL4R/IL18/TICAM1/LCP1/SUPT6H/LAT/EIF2AK4/IL6R/ADA/CD74/RAC2/NKG7/PLCG2/CORO1A/STAT6/ZFPM1/LYN/CBL/LGALS9/SBNO2/ST3GAL1/VAMP2/GATA1/ITGB2/BCL3/IFI35/ITGAM/DOCK2/UNC13D/NCKAP1L/PTGDS/HLX/PYCARD/LAMP1/PTAFR/ITGAL/SPI1/SYK/FES/RARA/STAT3/PRAM1/GRN/PIK3CD/APBB1I…
GO:0051924	BP	regulation of calcium ion transport	170	-0.394141	-1.456	0.00308642	0.143315	0.128613	2605	tags=28%, list=19%, signal=23%	CDK5/CRHR1/PSEN2/BAK1/PIK3CG/P2RX4/CD33/GJC2/VDAC1/LILRA5/LILRB2/CALM1/FYN/CD84/CACNG6/EPB41/CYBA/PTK2B/LILRA2/RHOA/GSTM2/ARRB2/PDPK1/SPHK2/P2RX7/BEST1/BAX/BDKRB1/STIM1/PLCG1/ADORA2A/BIN1/PLCG2/CORO1A/ORAI1/CALM3/CD4/SNCA/LYN/TSPO/P2RX1/TRPV2/FKBP1A/GNAI2/SLC9A1/DIAPH1/G6PD
GO:0006909	BP	phagocytosis	192	-0.390293	-1.4507	0.003125	0.143315	0.128613	1969	tags=29%, list=15%, signal=25%	MFGE8/IL1B/CEACAM4/MYD88/FYN/GSN/ABCA7/TMEM175/SIRPB1/IL2RB/ANXA11/CD300LF/CYBA/MET/FCER1G/CD300A/TYROBP/P2RX7/MARCO/TGM2/PECAM1/CLN3/ADORA2A/IL2RG/RAC2/CNN2/PLCG2/CORO1A/FCN1/HCK/VAV1/LYN/CALR/ITGB2/MYO1G/ITGAM/DOCK2/PAK1/UNC13D/ICAM3/NCKAP1L/PYCARD/NCF4/CSK/PIP5K1C/ITGAL/EIF2AK1/SYK/RARA/SH3BP1/MYH9/MEGF10/DNM2/RHOG/CD14/DYSF
GO:0005730	CC	nucleolus	736	0.380884	1.45042	0.00119617	0.143315	0.128613	1980	tags=23%, list=15%, signal=21%	RPL26/RPS3A/RPL23/RPL7/OXR1/DEK/RPL27/RPL5/RPS27A/SUZ12/CMPK1/RPL35/PPP1CC/ZBTB33/AKAP11/SUB1/RPS25/RPL11/RPS6/UBE2N/SNORD13/PPP1R12A/NOC3L/USO1/RPS10/UBLCP1/XPO1/SIRT1/DHX15/TBCA/EEF1E1/ZCCHC7/JAK2/AGTPBP1/JAZF1/ZZZ3/EIF3A/RPL4/HMGB2/MTDH/RPAIN/MRPS31/FRG1/GNL3/WDR75/HERC4/PPM1B/RPL3/CUTC/NGDN/PLRG1/MORF4L2/RPS14/RBM34/SRP19/HSPA8/SMARCA5/RGS2/NIP7/DNAJB9/RPS13/NOL11/MTX2/DDX50/PPP1CB/BTBD10/SNR…
GO:0101002	CC	ficolin-1-rich granule	169	-0.393315	-1.45024	0.00309598	0.143315	0.128613	1725	tags=34%, list=13%, signal=30%	COMMD9/PGAM1/AP2A2/EEF2/VCL/FCER1G/CSTB/RHOA/HSP90AB1/CD300A/APEH/NME2/IMPDH2/TCIRG1/ALOX5/SLC2A3/PGM1/GUSB/CTSZ/GAA/SIGLEC5/PSMD2/GSTP1/FCN1/TBC1D10C/NBEAL2/DBNL/PFKL/CST3/GNS/FPR1/ADAM8/HK3/CAPN1/ITGB2/COTL1/VCP/LRG1/NCKAP1L/IMPDH1/ATP6V0A1/ALDOC/XRCC6/ATG7/LAMP1/PLEKHO2/KRT1/UBR4/GPI/CSNK2B/DIAPH1/MVP/CTSB/CRISPLD2/CTSD/CDA/MMP9
GO:0007160	BP	cell-matrix adhesion	176	-0.391623	-1.44554	0.00316456	0.143315	0.128613	2450	tags=23%, list=18%, signal=19%	ITGAX/JAM3/PRKCZ/SRC/EPHA1/CLASP1/PTPRA/JUP/TRIP6/RCC2/ITGB5/S100A10/ACTG1/VCL/PTK2B/RHOA/DUSP3/LYPD3/CD63/RRAS/CTTN/SRF/PXN/TAOK2/DISC1/HOXD3/GSK3B/PPM1F/DDR1/ITGB2/ITGB7/FERMT3/ITGAM/PARVG/CD3E/ITGAL/ITGA2B/SLC9A1/ITGA5/ZYX/ACTN1
GO:0016773	MF	phosphotransferase activity, alcohol group as acceptor	504	-0.353627	-1.43968	0.00456621	0.143315	0.128613	2605	tags=28%, list=19%, signal=24%	CDK5/GRK5/EPHB4/RAF1/EFNA4/BRD4/PASK/RIPK3/AKAP13/PRKAB1/PIK3CG/PIP4K2C/STK40/RPS6KL1/PRKCZ/MAP2K7/SRC/ALPK1/EPHA1/RASSF2/PAPSS2/SHPK/LATS2/LTBP4/DOLK/PI4KAP1/GLYCTK/PRKY/MAP3K14/MARK3/STK35/MAP3K12/ENG/AATK/RPS6KB2/NUAK2/STK11/JAK1/FGFRL1/PPP1R9B/FYN/PIK3C2B/BRD2/STK38/CAMK1/PAK4/EPHA8/MAPKAPK2/EIF2AK2/STK36/RIPK4/SBK1/MAP2K3/ADCK1/PFKFB3/MET/GALK1/PTK2B/CLK3/PDK3/STK19/PHKG2/RPS6KA1/CDK9/CDKN1A…
GO:0060205	CC	cytoplasmic vesicle lumen	273	-0.374768	-1.43597	0.00348432	0.143315	0.128613	1737	tags=29%, list=13%, signal=26%	PTGES2/COMMD9/PA2G4/PGAM1/SERPING1/EEF2/VCL/ANXA2/LTF/ARSA/FTL/NEU1/TOLLIP/PSMD1/CSTB/ARHGAP9/HSP90AB1/NME2/F5/GM2A/FOLR3/PDXK/APRT/IMPDH2/PADI2/ALOX5/STK11IP/ACAA1/GUSB/CTSW/GLA/CTSZ/ADA/GHDC/CNN2/NFKB1/PSMD2/GSTP1/PYGB/FCN1/DYNC1H1/VAT1/RNASET2/DBNL/PFKL/CYB5R3/GNS/ORM1/HK3/S100A11/TRAPPC1/COTL1/VCP/FERMT3/LRG1/DOCK2/UNC13D/IMPDH1/PYCARD/SPTAN1/CFP/ALDOC/XRCC6/ATG7/OSCAR/MAN2B1/LCN2/GPI/CSNK2B/…
GO:0031983	CC	vesicle lumen	274	-0.374198	-1.4355	0.00346021	0.143315	0.128613	1737	tags=29%, list=13%, signal=26%	PTGES2/COMMD9/PA2G4/PGAM1/SERPING1/EEF2/VCL/ANXA2/LTF/ARSA/FTL/NEU1/TOLLIP/PSMD1/CSTB/ARHGAP9/HSP90AB1/NME2/F5/GM2A/FOLR3/PDXK/APRT/IMPDH2/PADI2/ALOX5/STK11IP/ACAA1/GUSB/CTSW/GLA/CTSZ/ADA/GHDC/CNN2/NFKB1/PSMD2/GSTP1/PYGB/FCN1/DYNC1H1/VAT1/RNASET2/DBNL/PFKL/CYB5R3/GNS/ORM1/HK3/S100A11/TRAPPC1/COTL1/VCP/FERMT3/LRG1/DOCK2/UNC13D/IMPDH1/PYCARD/SPTAN1/CFP/ALDOC/XRCC6/ATG7/OSCAR/MAN2B1/LCN2/GPI/CSNK2B/…
GO:0031012	CC	extracellular matrix	330	-0.366663	-1.43532	0.00364964	0.143315	0.128613	4145	tags=35%, list=31%, signal=25%	SFRP1/COL7A1/CPN2/RARRES2/ANG/LRRN2/OVGP1/COL5A1/COL6A3/PCSK6/FGF1/PLSCR1/ATRN/SERPINE1/NID1/ADAMTS8/PCOLCE/COL9A2/FGA/ADAMTS15/ADAMTS13/APCS/CPA3/POSTN/BCAN/GP1BA/COL20A1/MUC2/CCBE1/WNT5B/GREM1/NPPA/SERPINA1/FBLN2/LEFTY2/C1QA/GPC2/F13A1/IMPG2/TGFBR3/SEMA7A/MMP25/RTN4RL1/ADAMTSL5/COL14A1/ITIH4/TINAG/SPON2/SERPINB8/TGFBI/C1QB/AEBP1/ECM1/HAPLN2/ADAM19/LGALS3BP/CTSG/COL23A1/FBN2/F12/LGALS1/SPARC/SER…
GO:0031966	CC	mitochondrial membrane	504	0.386469	1.43503	0.00127714	0.143315	0.128613	2493	tags=31%, list=19%, signal=26%	COX7C/NDUFA4/TOMM7/UQCRQ/NDUFB3/RPS27A/COX7A2/TMEM126B/PPP1CC/NDUFB2/NDUFS4/COX7B/NDUFA1/LDHB/NDUFS5/MRPS18C/TMEM14B/TMEM126A/RPS6KB1/CRLS1/MRPL32/MRPL50/HIGD1A/OGT/BNIP3L/MRPL3/RHOT1/NDUFAB1/COX6C/SLC44A1/SDHD/TOMM20/MRPS22/ABCB10/MRPL13/PNPLA8/ATAD1/MRPL33/SLC25A46/MRPL51/MRPS31/MRPS33/MRPL15/COQ5/MRPL22/NDUFB5/MTX2/MRPS35/OMA1/COQ2/ACADM/ACSL4/GRPEL2/MRPS21/COQ10B/UQCRC2/PMPCB/DNAJC15/ACSL1/MR…
GO:0098797	CC	plasma membrane protein complex	406	-0.357684	-1.43488	0.00393701	0.143315	0.128613	2572	tags=24%, list=19%, signal=20%	PSEN2/GNGT2/HLA-H/CHRNB3/ITGAX/KCNAB2/CD247/LRRC26/CLTA/PGM5/RAMP2/GJC2/HLA-DRB3/GJC1/CDH9/IL27RA/JUP/HLA-DRB4/ATP1A1/GNG7/HLA-F/CALM1/ITGB5/EPS15L1/APH1A/S100A10/AP2A2/NOXO1/CACNG6/IL2RB/KCNK6/ANXA2/ATP1A3/NCF1B/CYBA/TRADD/FCER1G/PTK2B/TSPAN32/AP2B1/AP2A1/GNG5/IKBKB/SLC6A6/AP2S1/GNA12/APH1B/HLA-E/HLA-DMA/IL6R/HLA-C/NCSTN/NEO1/CD74/SLC7A5/CHRNA2/TNK2/HLA-B/GNA15/GNAS/PSENEN/CTNNA1/FCGR3A/CALM3/CD…
GO:0030312	CC	external encapsulating structure	331	-0.366441	-1.43366	0.00367647	0.143315	0.128613	4145	tags=35%, list=31%, signal=25%	SFRP1/COL7A1/CPN2/RARRES2/ANG/LRRN2/OVGP1/COL5A1/COL6A3/PCSK6/FGF1/PLSCR1/ATRN/SERPINE1/NID1/ADAMTS8/PCOLCE/COL9A2/FGA/ADAMTS15/ADAMTS13/APCS/CPA3/POSTN/BCAN/GP1BA/COL20A1/MUC2/CCBE1/WNT5B/GREM1/NPPA/SERPINA1/FBLN2/LEFTY2/C1QA/GPC2/F13A1/IMPG2/TGFBR3/SEMA7A/MMP25/RTN4RL1/ADAMTSL5/COL14A1/ITIH4/TINAG/SPON2/SERPINB8/TGFBI/C1QB/AEBP1/ECM1/HAPLN2/ADAM19/LGALS3BP/CTSG/COL23A1/FBN2/F12/LGALS1/SPARC/SER…
GO:0007169	BP	transmembrane receptor protein tyrosine kinase signaling pathway	420	-0.357701	-1.43329	0.00416667	0.143315	0.128613	2919	tags=31%, list=22%, signal=25%	FGR/ADAM17/KLB/PTK6/RBPJ/ADRA2A/PTPRG/NEDD9/DDIT4/MPZL1/SPRY4/KALRN/RAC1/SHCBP1/PTPRR/EPHB4/GHRL/RAF1/EFNA4/ZGPAT/SAMD10/SULF2/RASGRP4/CBLB/GIGYF1/PIP4K2C/AKT1S1/SIPA1L1/ZBTB7B/RHBDF2/TXNIP/PRKCZ/SRC/EPHA1/GALNT3/RASSF2/SH2B3/FBXW7/FUZ/PTPRA/CEACAM1/GAB2/SIRT2/FGF23/GIT1/IL1B/DOK2/DOK3/JAK1/FUT7/FGFRL1/ANKS1A/NDEL1/FYN/EPHA8/MAPKAPK2/RGS14/WDR54/SLC2A8/EIF4EBP2/LEPROT/EXT1/ZFAND2B/STUB1/TRADD/MET…
GO:0034774	CC	secretory granule lumen	270	-0.374084	-1.43008	0.00350877	0.143315	0.128613	1737	tags=29%, list=13%, signal=26%	PTGES2/COMMD9/PA2G4/PGAM1/SERPING1/EEF2/VCL/ANXA2/LTF/ARSA/FTL/NEU1/TOLLIP/PSMD1/CSTB/ARHGAP9/HSP90AB1/NME2/F5/GM2A/FOLR3/PDXK/APRT/IMPDH2/PADI2/ALOX5/STK11IP/ACAA1/GUSB/CTSW/GLA/CTSZ/GHDC/CNN2/NFKB1/PSMD2/GSTP1/PYGB/FCN1/DYNC1H1/VAT1/RNASET2/DBNL/PFKL/CYB5R3/GNS/ORM1/HK3/S100A11/TRAPPC1/COTL1/VCP/FERMT3/LRG1/DOCK2/UNC13D/IMPDH1/PYCARD/SPTAN1/CFP/ALDOC/XRCC6/ATG7/OSCAR/MAN2B1/LCN2/GPI/CSNK2B/GRN/…
GO:0051493	BP	regulation of cytoskeleton organization	369	-0.359592	-1.42965	0.00377358	0.143315	0.128613	2288	tags=29%, list=17%, signal=24%	EPHA1/ARF1/ALMS1/HSPA1A/PAFAH1B1/ARPC1A/ARFIP2/CORO1B/NUBP1/CLASP1/ARHGDIB/PICK1/TRIOBP/CHMP2A/GIT1/MYADM/RNF4/GSN/TBCD/NUMA1/S100A10/MID1IP1/PHPT1/SSH1/ACTG1/CCNF/RBM14/MET/PTK2B/SPTBN4/NUP62/DBN1/RHOA/EVL/ESAM/CRK/VASP/TESK1/ARHGEF18/P2RX7/RHOF/FHOD1/DCTN1/TAOK1/KATNB1/ABI3/PFN1/CHMP4B/SPTBN1/SSH3/CDC42EP2/CLN3/CTTN/CDK5RAP2/BIN1/PXN/FLNA/TAOK2/RAC2/HDAC6/FSCN1/TWF2/HCLS1/CORO1A/DYNC1H1/HCK/ARP…
GO:0006898	BP	receptor-mediated endocytosis	179	-0.382307	-1.41833	0.00308642	0.143315	0.128613	1728	tags=28%, list=13%, signal=25%	TPCN2/CEACAM1/PICK1/NECAB2/LRP3/ASGR1/AP2A2/WDR54/DNAJC13/ANXA2/FCER1G/LRPAP1/ARRB1/AP1G1/AP2B1/ARRB2/UNC119/AP2A1/MARCO/AP2S1/PI4KB/CD63/LDLRAP1/CLN3/CTTN/SNX17/CXCL16/ATXN2/AP1G2/TNK2/DAB2/PLCG2/HIP1/DBNL/SNCA/FCHO1/CBL/GRB2/ITGB2/ITGAM/AAK1/RIN3/PIP5K1C/IGF2R/SYK/PDLIM7/FLOT1/DNM2/CD14/AP2M1/SORL1
GO:0099513	CC	polymeric cytoskeletal fiber	435	-0.352217	-1.41548	0.00429185	0.143315	0.128613	2227	tags=24%, list=17%, signal=21%	PCNT/TPM4/CORO1B/KIFC2/CLASP1/TUBB2A/GABARAPL1/GAS7/PBXIP1/KIF1B/JUP/LMNB2/SIRT2/CHMP2A/TTLL3/RCC2/VIM/RNF4/MAP1LC3A/CALM1/TFPT/NDEL1/REEP4/FYN/TUBGCP6/TBCD/NUMA1/KLC3/TTLL4/TUBA1A/MID1IP1/RUSC1/DNAH1/RGS14/ACTG1/TBCB/TUBA4A/TUBA1C/MX1/SPTBN4/DBN1/ACTB/PSTPIP1/RCSD1/CSNK1D/DCTN1/GOLGA2/STIM1/DCXR/DYNLRB1/KATNB1/LCP1/KLHL21/KIF13B/CHMP4B/LDLRAP1/CTTN/NDRG1/EMD/ADORA2A/CDK5RAP2/RAC2/HDAC6/DISC1/TWF…
GO:0016032	BP	viral process	332	-0.361168	-1.4126	0.00369004	0.143315	0.128613	1832	tags=27%, list=14%, signal=24%	ITGB5/RAB43/VPS4A/GSN/IFITM3/OAS1/USF1/TP53/EIF2AK2/MAN1B1/EDEM2/SMPD1/ISG20/LARP1/LTF/MX1/CTDP1/NCAM1/DDB1/ST6GALNAC2/SLC1A5/HSP90AB1/CDK9/TRIM8/EP300/PARP10/ST3GAL2/TRIM11/EIF3G/CCNK/OASL/CHMP4B/EIF2AK4/SMARCA4/TBC1D20/HDAC1/P4HB/PTBP1/ZBED1/CD74/VPS37C/RAB1B/HCFC1/SMARCB1/FCN1/SP1/TRIM38/BSG/IFITM2/VPS18/NOTCH1/APOBEC3C/PCBP2/GSK3B/CD4/TRIM25/LY6E/SELPLG/EIF3B/LGALS9/SETDB1/ST3GAL1/CHMP1A/CFL1…
GO:0099512	CC	supramolecular fiber	585	-0.342885	-1.41201	0.0049505	0.143315	0.128613	2279	tags=23%, list=17%, signal=20%	ARF1/PAFAH1B1/LTBP4/PCNT/TPM4/ATP2B4/LMAN1/CORO1B/KIFC2/CLASP1/TUBB2A/GABARAPL1/GAS7/PBXIP1/KIF1B/JUP/LMNB2/SIRT2/CHMP2A/TTLL3/RCC2/VIM/RNF4/MAP1LC3A/STK11/CALM1/TFPT/FHL2/NDEL1/REEP4/FYN/TUBGCP6/TBCD/NUMA1/MYBPC3/KLC3/TTLL4/TUBA1A/MID1IP1/RUSC1/DNAH1/RGS14/ACTG1/STUB1/VCL/TBCB/TUBA4A/TUBA1C/MX1/SPTBN4/DBN1/ACTB/PSTPIP1/RCSD1/HSPB1/CSNK1D/DCTN1/MYOM2/GOLGA2/STIM1/DCXR/DYNLRB1/MYL4/KATNB1/ACTA2/LC…
GO:0099081	CC	supramolecular polymer	590	-0.342373	-1.4117	0.00490196	0.143315	0.128613	2279	tags=23%, list=17%, signal=20%	ARF1/PAFAH1B1/LTBP4/PCNT/TPM4/ATP2B4/LMAN1/CORO1B/KIFC2/CLASP1/TUBB2A/GABARAPL1/GAS7/PBXIP1/KIF1B/JUP/LMNB2/SIRT2/CHMP2A/TTLL3/RCC2/VIM/RNF4/MAP1LC3A/STK11/CALM1/TFPT/FHL2/NDEL1/REEP4/FYN/TUBGCP6/TBCD/NUMA1/MYBPC3/KLC3/TTLL4/TUBA1A/MID1IP1/RUSC1/DNAH1/RGS14/ACTG1/STUB1/VCL/TBCB/TUBA4A/TUBA1C/MX1/SPTBN4/DBN1/ACTB/PSTPIP1/RCSD1/HSPB1/CSNK1D/DCTN1/MYOM2/GOLGA2/STIM1/DCXR/DYNLRB1/MYL4/KATNB1/ACTA2/LC…
GO:0007346	BP	regulation of mitotic cell cycle	345	0.388754	1.40818	0.00544218	0.143315	0.128613	2286	tags=24%, list=17%, signal=20%	RPL26/ANXA1/ZMPSTE24/ANGEL2/RAB11A/TMEM14B/RPS6KB1/HECA/ZFP36L1/BUB3/SIRT1/DYNLT3/RPS27L/VPS4B/CCNG1/NAE1/PTPN11/RPA3/RIOK2/PLRG1/ANAPC4/PPP2CA/CRLF3/MYC/RNASEH2B/SLFN11/CDKN1B/RRM2B/ACVR1/TRIAP1/SDCBP/CKS2/CCNH/AIF1/IQGAP1/NSMCE2/PKD2/SYF2/PTEN/ID2/THAP1/RB1/CKS1B/PCID2/RPA2/FBXO5/WAC/HECW2/RDX/PKIA/BID/CDC26/USP47/RAD21/YTHDC2/TOPBP1/CUL4B/BRCC3/BTG1/HNRNPU/CD28/CDC23/MAD2L1BP/BCL2/CDC7/RBL2/PK…
GO:0032970	BP	regulation of actin filament-based process	276	-0.366276	-1.40482	0.00355872	0.143315	0.128613	2288	tags=28%, list=17%, signal=24%	EPHA1/ARF1/ALMS1/ARPC1A/ARFIP2/CORO1B/CLASP1/ARHGDIB/JUP/PICK1/TRIOBP/MYADM/GSN/MYBPC3/S100A10/PHPT1/SSH1/ACTG1/MET/PTK2B/SPTBN4/DBN1/RHOA/EVL/ESAM/CRK/VASP/TESK1/ARHGEF18/RHOF/FHOD1/TAOK1/ABI3/PFN1/ACTA2/SPTBN1/SSH3/CDC42EP2/CTTN/BIN1/PXN/FLNA/TAOK2/RAC2/CNN2/FSCN1/TWF2/HCLS1/CORO1A/HCK/ARPC1B/CDC42EP4/DBNL/PPM1F/GRB2/ADD1/WDR1/COTL1/TMOD1/PAK1/CSF1R/NCKAP1L/PYCARD/SPTAN1/ARPC4/MAGEL2/FLII/CAPZB…
GO:0090066	BP	regulation of anatomical structure size	339	-0.35498	-1.39653	0.00367647	0.143315	0.128613	1455	tags=20%, list=11%, signal=18%	PTK2B/KLF2/SPTBN4/SEMA4B/DBN1/RHOA/EVL/HSP90AB1/ESAM/VASP/SLC12A9/KEL/ULK1/P2RX7/PLOD3/PFN1/ACTA2/SIN3A/SPTBN1/SSH3/CDC42EP2/CLN3/CTTN/PPP1R15A/ADORA2A/SRF/BIN1/DISC1/TWF2/HCLS1/GDI1/CORO1A/HCK/ARHGAP4/ARPC1B/CDC42EP4/GSK3B/DBNL/VAV1/SLC9A3R1/P2RX1/GRB2/ADD1/WDR1/TRPV2/COTL1/TBXAS1/TMOD1/NCKAP1L/PYCARD/SPTAN1/RIN3/ARPC4/SEMA4D/PPP1CA/DSCAM/FLII/CAPZB/CYFIP2/GPX1/WAS/SH3BP1/SSH2/MSN/DNM2/AP2M1/SEM…
GO:0005773	CC	vacuole	626	-0.336296	-1.38981	0.00537634	0.143315	0.128613	2591	tags=33%, list=19%, signal=28%	ANKFY1/DPP7/ACLY/PSEN2/RILP/HYAL3/HLA-H/MEFV/LAMP2/DDOST/NAGLU/ARSG/AGRN/ANXA6/STARD3/PIP4K2C/P2RX4/CLTA/RAMP2/HLA-DRB3/TMEM79/CTSH/SRC/OSBPL7/SLC2A6/WDR81/TEX264/ITM2C/SDC3/GABARAPL1/ARSD/LRBA/NPC2/TPCN2/B4GALT1/UBQLN4/MPO/HLA-DRB4/RAB5C/TCN2/TBC1D14/CHMP2A/SLC15A4/IL1B/ATP6V1B2/HLA-F/MAGT1/USP4/MAP1LC3A/SLC46A3/VPS33B/DAGLB/VPS4A/ATP13A2/AP1B1/UNC93B1/PTGES2/IFITM3/IFNAR1/PA2G4/NFAM1/AP2A2/WDR4…
GO:0016301	MF	kinase activity	541	-0.340596	-1.38873	0.0049505	0.143315	0.128613	2605	tags=27%, list=19%, signal=23%	CDK5/GRK5/EPHB4/RAF1/EFNA4/BRD4/PASK/RIPK3/AKAP13/PRKAB1/PIK3CG/PIP4K2C/STK40/RPS6KL1/PRKCZ/MAP2K7/SRC/ALPK1/EPHA1/RASSF2/PAPSS2/SHPK/LATS2/LTBP4/DOLK/PI4KAP1/GLYCTK/PRKY/MAP3K14/MARK3/STK35/MAP3K12/ENG/AATK/RPS6KB2/NUAK2/STK11/JAK1/FGFRL1/CARD11/PPP1R9B/FYN/PIK3C2B/BRD2/STK38/CAMK1/PAK4/EPHA8/MAPKAPK2/EIF2AK2/STK36/NAGK/RIPK4/SBK1/MAP2K3/ADCK1/PFKFB3/MET/GALK1/PTK2B/CLK3/PDK3/STK19/PMVK/PHKG2/RP…
GO:0097435	BP	supramolecular fiber organization	540	-0.340387	-1.38814	0.00492611	0.143315	0.128613	1836	tags=22%, list=14%, signal=19%	NDEL1/ITGB5/PPP1R9B/TUBGCP6/GSN/MICAL2/TBCD/NUMA1/S100A10/MID1IP1/SH3KBP1/NAT8B/SSH1/ACTG1/EXT1/MET/PTK2B/SPTBN4/ARRB1/DBN1/RHOA/EVL/HSP90AB1/ESAM/VASP/BIN3/TESK1/ARHGEF18/PSTPIP1/RHOF/FHOD1/BAX/CSNK1D/DCTN1/MYOM2/GOLGA2/PLOD3/TAOK1/KATNB1/PFN1/LCP1/MSRB2/SPTBN1/SSH3/CDC42EP2/CTTN/MYL9/SIAH2/CDK5RAP2/SRF/BIN1/PXN/FLNA/RAC2/MARCKSL1/HDAC6/FSCN1/TWF2/TTC17/HCLS1/CORO1A/KCTD13/DYNC1H1/HCK/CTNNA1/ARP…
GO:0032956	BP	regulation of actin cytoskeleton organization	246	-0.365728	-1.38409	0.00337838	0.143315	0.128613	2288	tags=30%, list=17%, signal=25%	EPHA1/ARF1/ALMS1/ARPC1A/ARFIP2/CORO1B/CLASP1/ARHGDIB/PICK1/TRIOBP/MYADM/GSN/S100A10/PHPT1/SSH1/ACTG1/MET/PTK2B/SPTBN4/DBN1/RHOA/EVL/ESAM/CRK/VASP/TESK1/ARHGEF18/RHOF/FHOD1/TAOK1/ABI3/PFN1/SPTBN1/SSH3/CDC42EP2/CTTN/BIN1/PXN/FLNA/TAOK2/RAC2/FSCN1/TWF2/HCLS1/CORO1A/HCK/ARPC1B/CDC42EP4/DBNL/PPM1F/GRB2/ADD1/WDR1/COTL1/TMOD1/PAK1/CSF1R/NCKAP1L/PYCARD/SPTAN1/ARPC4/MAGEL2/FLII/CAPZB/CYFIP2/FES/SLC9A1/WAS…
GO:0042330	BP	taxis	420	-0.344935	-1.38213	0.00416667	0.143315	0.128613	1611	tags=17%, list=12%, signal=16%	TIRAP/EXT1/CXCL14/MET/FCER1G/PTK2B/SEMA4B/CRKL/NCAM1/RHOA/DUSP3/ARRB2/CRK/VASP/STX4/EP300/HSPB1/EPHB6/PADI2/RALBP1/CMTM5/LYPLA2/RNF165/ALOX5/GBF1/IL6R/CXCL16/PLP2/NEO1/CD74/RAC2/DAPK2/CORO1A/BSG/TSC2/NOTCH1/PPM1F/VAV1/LYN/FPR1/NINJ1/ADAM8/LGALS9/CALR/ITGB2/DOCK2/CSF1R/NCKAP1L/GPSM3/TNFSF14/PRKD2/RIN3/PLAUR/SEMA4D/PIP5K1C/PTAFR/CMTM3/DSCAM/SPI1/SYK/FES/C5AR1/WNK1/MAPK3/RHOG/PIK3CD/MPP1/CSF3R/IL17R…
GO:0000323	CC	lytic vacuole	559	-0.336328	-1.37993	0.00485437	0.143315	0.128613	2030	tags=28%, list=15%, signal=24%	HLA-DRB4/RAB5C/TCN2/CHMP2A/SLC15A4/IL1B/ATP6V1B2/HLA-F/MAGT1/USP4/MAP1LC3A/SLC46A3/VPS33B/DAGLB/VPS4A/ATP13A2/AP1B1/UNC93B1/PTGES2/IFITM3/IFNAR1/PA2G4/NFAM1/AP2A2/WDR48/SLC2A8/RNASE6/TMEM175/TFEB/ATP6V0B/SMPD1/ANXA11/DNAJC13/ANXA2/TOM1/TM9SF1/ARSA/FTL/NEU1/TOLLIP/PSMD1/SURF4/ARRB1/AP1G1/MAN2B2/AP3D1/AP2B1/HSP90AB1/AP2A1/SPHK2/NCAN/GM2A/DNAJC5/AP2S1/SGSH/TMBIM1/SPNS1/CLEC16A/PADI2/ABCD1/BRI3/CD63/…
GO:0005764	CC	lysosome	559	-0.336328	-1.37993	0.00485437	0.143315	0.128613	2030	tags=28%, list=15%, signal=24%	HLA-DRB4/RAB5C/TCN2/CHMP2A/SLC15A4/IL1B/ATP6V1B2/HLA-F/MAGT1/USP4/MAP1LC3A/SLC46A3/VPS33B/DAGLB/VPS4A/ATP13A2/AP1B1/UNC93B1/PTGES2/IFITM3/IFNAR1/PA2G4/NFAM1/AP2A2/WDR48/SLC2A8/RNASE6/TMEM175/TFEB/ATP6V0B/SMPD1/ANXA11/DNAJC13/ANXA2/TOM1/TM9SF1/ARSA/FTL/NEU1/TOLLIP/PSMD1/SURF4/ARRB1/AP1G1/MAN2B2/AP3D1/AP2B1/HSP90AB1/AP2A1/SPHK2/NCAN/GM2A/DNAJC5/AP2S1/SGSH/TMBIM1/SPNS1/CLEC16A/PADI2/ABCD1/BRI3/CD63/…
GO:0052547	BP	regulation of peptidase activity	310	-0.355106	-1.37784	0.0035461	0.143315	0.128613	1959	tags=24%, list=15%, signal=21%	RCN3/NDUFA13/ATP2A3/CASP9/FYN/GSN/APH1A/SERPINA10/ATP13A2/CIDEB/SERPING1/PRDX5/ANXA2/LTF/PCSK1N/CSTB/RHOA/RPS6KA1/ARRB2/MBP/BAX/NLRP1/APH1B/BOK/DAP/PSME3/UBE2O/SIAH2/FIS1/ADORA2A/SPOCK2/ADRM1/PRELID1/HDAC1/BIN1/NCSTN/BBC3/MAP3K5/PINK1/PSENEN/IFI6/HIP1/PPM1F/SNCA/LYN/LAPTM5/CST3/POR/BCAP31/GAPDH/P2RX1/LGALS9/CST7/VCP/FURIN/TNFSF14/PYCARD/PLAUR/NLRP12/RENBP/SYK/CYFIP2/MICAL1/GPX1/STAT3/GPI/CFLAR/GR…
GO:0007167	BP	enzyme linked receptor protein signaling pathway	646	-0.33325	-1.37692	0.00558659	0.143315	0.128613	2919	tags=28%, list=22%, signal=23%	FGR/ADAM17/KLB/CDKN1C/PTK6/RBPJ/ADRA2A/C20orf27/PTPRG/NEDD9/GDF1/DDIT4/MPZL1/IL17RD/SPRY4/FBN2/KALRN/TOB1/TGIF2/RAC1/SHCBP1/PTPRR/EPHB4/GHRL/RAF1/EFNA4/ZGPAT/SAMD10/SULF2/AKAP3/RASGRP4/CBLB/GIGYF1/PIP4K2C/AKT1S1/GP6/SIPA1L1/ZBTB7B/RHBDF2/TXNIP/PRKCZ/GIPC1/SRC/EPHA1/GALNT3/RASSF2/HSPA1A/SH2B3/LATS2/LTBP4/FBXW7/FUZ/PTPRA/CEACAM1/GAB2/SIRT2/FGF23/GIT1/IL1B/ENG/TGFBRAP1/DOK2/VIM/STK11/DOK3/JAK1/FUT7/…
GO:0006935	BP	chemotaxis	417	-0.34302	-1.37328	0.00413223	0.143315	0.128613	1611	tags=17%, list=12%, signal=15%	TIRAP/EXT1/CXCL14/MET/FCER1G/PTK2B/SEMA4B/CRKL/NCAM1/RHOA/DUSP3/ARRB2/CRK/VASP/STX4/HSPB1/EPHB6/PADI2/RALBP1/CMTM5/LYPLA2/RNF165/ALOX5/GBF1/IL6R/CXCL16/PLP2/NEO1/CD74/RAC2/DAPK2/CORO1A/BSG/TSC2/NOTCH1/PPM1F/VAV1/LYN/FPR1/NINJ1/ADAM8/LGALS9/CALR/ITGB2/DOCK2/CSF1R/NCKAP1L/GPSM3/TNFSF14/PRKD2/RIN3/PLAUR/SEMA4D/PIP5K1C/PTAFR/CMTM3/DSCAM/SPI1/SYK/FES/C5AR1/WNK1/MAPK3/RHOG/PIK3CD/MPP1/CSF3R/IL17RA/SEMA…
GO:0032101	BP	regulation of response to external stimulus	690	-0.330593	-1.36853	0.00564972	0.143315	0.128613	1865	tags=22%, list=14%, signal=20%	METRNL/VSIG4/FUT7/RNF26/NDEL1/DAGLB/MICB/MYD88/FYN/MFHAS1/CCDC92/FAM3A/STAT2/IL10/OAS1/SIGIRR/USF1/RGMA/LAG3/TIRAP/SERPING1/IRF1/TRIM44/LTF/CYBA/RBM14/TRADD/MET/PTK2B/LILRA2/SEMA4B/AP1G1/CEBPA/TSPAN32/HSP90AB1/DUSP3/ARRB2/CRK/STX4/EMILIN2/TYROBP/IKBKB/EP300/HSPB1/IL18/NLRP1/PARP14/TRIM41/CDC37/HLA-E/PADI2/NMT1/AOAH/SIN3A/OASL/PLCG1/ZBP1/EIF2AK4/ALOX5/PTPN1/STAT5B/IL6R/TTLL12/NLRX1/ADORA2A/ADA/FLN…
GO:0016817	MF	hydrolase activity, acting on acid anhydrides	526	0.366507	1.36819	0.00124844	0.143315	0.128613	2190	tags=25%, list=16%, signal=22%	RGS18/ATP6V1G1/DCP2/BTAF1/RAB8B/EIF4A2/RAP2A/RAB10/GNA13/CHD1/RAB11A/ARL8B/RASA1/PPA1/ARL5A/PSMC2/DHX15/RHOT1/RAB33B/GIMAP7/VPS4B/RAP1B/GNAI3/PSMC6/ABCB10/HSPE1/GTF2F2/RAB5A/HSPH1/ENPP4/ATAD1/RAP2C/RNGTT/CCT2/DDX1/HSPA8/SMARCA5/RHEB/RGS2/CHD9/DDX50/GNG11/HSPA14/RAB21/SAR1A/IFIH1/GNG10/GFM1/EEF1A1/RAB6A/HSP90B1/RALA/GBP1/SMCHD1/SPAST/SMC3/SMARCA2/SLFN11/DDX46/DDX21/DDX18/KIF2A/G3BP1/GNL2/DDX60/GBP…
GO:0016818	MF	hydrolase activity, acting on acid anhydrides, in phosphorus-containing anhydrides	526	0.366507	1.36819	0.00124844	0.143315	0.128613	2190	tags=25%, list=16%, signal=22%	RGS18/ATP6V1G1/DCP2/BTAF1/RAB8B/EIF4A2/RAP2A/RAB10/GNA13/CHD1/RAB11A/ARL8B/RASA1/PPA1/ARL5A/PSMC2/DHX15/RHOT1/RAB33B/GIMAP7/VPS4B/RAP1B/GNAI3/PSMC6/ABCB10/HSPE1/GTF2F2/RAB5A/HSPH1/ENPP4/ATAD1/RAP2C/RNGTT/CCT2/DDX1/HSPA8/SMARCA5/RHEB/RGS2/CHD9/DDX50/GNG11/HSPA14/RAB21/SAR1A/IFIH1/GNG10/GFM1/EEF1A1/RAB6A/HSP90B1/RALA/GBP1/SMCHD1/SPAST/SMC3/SMARCA2/SLFN11/DDX46/DDX21/DDX18/KIF2A/G3BP1/GNL2/DDX60/GBP…
GO:0098609	BP	cell-cell adhesion	642	-0.330492	-1.36705	0.00537634	0.143315	0.128613	2454	tags=25%, list=18%, signal=21%	PIK3CG/ITGAX/JAM3/CBLB/NLRP3/LAX1/ELMO2/GP6/CD33/ZBTB7B/HLA-DRB3/PRKCZ/PCDHAC2/SRC/ZP3/SH2B3/CLSTN1/ST3GAL4/CLDN14/CDH9/AGER/IL27RA/SOX13/CEACAM1/JUP/HLA-DRB4/LILRB2/IL1B/MAD1L1/PCDHB9/MYADM/NFKBID/PTPN23/VSIG4/JAK1/FUT7/FGFRL1/ROBO3/ITGB5/CARD11/ZMIZ1/FYN/CD6/CD99/PAK4/IL10/CD5/MPL/CD84/ICAM2/LAG3/SIRPB1/LRFN3/ACTG1/EXT1/IRF1/VCL/FXYD5/ANXA2/RHOA/TSPAN32/ACTB/AP3D1/ESAM/DUSP3/CD300A/DHPS/EMILIN2…
GO:0031347	BP	regulation of defense response	465	-0.33806	-1.36578	0.00438596	0.143315	0.128613	1865	tags=27%, list=14%, signal=24%	CEACAM1/LILRA5/SIRT2/GPATCH3/SLC15A4/GIT1/IL1B/HLA-F/METRNL/VSIG4/FUT7/RNF26/DAGLB/MICB/MYD88/FYN/MFHAS1/CCDC92/FAM3A/STAT2/IL10/OAS1/LAG3/TIRAP/SERPING1/IRF1/TRIM44/CYBA/RBM14/TRADD/LILRA2/AP1G1/CEBPA/TSPAN32/HSP90AB1/ARRB2/CRK/EMILIN2/TYROBP/IKBKB/EP300/IL18/NLRP1/PARP14/TRIM41/CDC37/HLA-E/AOAH/SIN3A/PLCG1/ZBP1/EIF2AK4/ALOX5/PTPN1/STAT5B/TTLL12/NLRX1/ADORA2A/ADA/TRAFD1/RELA/ALOX5AP/NKG7/NFKB1/H…
GO:2000145	BP	regulation of cell motility	656	-0.330417	-1.36542	0.00549451	0.143315	0.128613	2315	tags=22%, list=17%, signal=19%	CTSH/SRC/ZP3/EPHA1/HACE1/LRRC15/ATP2B4/CORO1B/FBXW7/CLASP1/ST3GAL4/ZNF580/FUZ/AGER/ARHGDIB/PLXND1/IL27RA/CEACAM1/JUP/CD151/FGF23/FBXO31/TRIP6/IL1B/ENG/RCC2/PLVAP/MYADM/PTPN23/FUT7/MYD88/AAMP/CD99/PHPT1/SPATA13/HMOX1/TIRAP/ACTG1/MAP2K3/VCL/ELP3/PGAM4/TRADD/MET/PTK2B/SEMA4B/CRKL/RHOA/EVL/DUSP3/CRK/CD300A/PDPK1/DNAJA4/STX4/EMILIN2/HSPB1/NISCH/PECAM1/GNA12/BDKRB1/CD99L2/PADI2/VASH1/ABI3/PFN1/ACTA2/RR…
GO:0051270	BP	regulation of cellular component movement	702	-0.328816	-1.36451	0.00564972	0.143315	0.128613	2315	tags=21%, list=17%, signal=19%	CTSH/SRC/ZP3/EPHA1/HACE1/LRRC15/ATP2B4/CORO1B/FBXW7/CLASP1/ST3GAL4/ZNF580/FUZ/AGER/ARHGDIB/PLXND1/IL27RA/CEACAM1/JUP/CD151/FGF23/FBXO31/TRIP6/IL1B/ENG/RCC2/PLVAP/MYADM/PTPN23/STK11/FUT7/MYD88/AAMP/CD99/MYBPC3/PHPT1/SPATA13/HMOX1/TIRAP/ACTG1/MAP2K3/VCL/ELP3/PGAM4/TRADD/MET/PTK2B/SEMA4B/CRKL/RHOA/EVL/DUSP3/CRK/CD300A/PDPK1/DNAJA4/STX4/EMILIN2/HSPB1/NISCH/PECAM1/GNA12/BDKRB1/CD99L2/PADI2/VASH1/ABI3/…
GO:0016462	MF	pyrophosphatase activity	523	0.365603	1.36436	0.00125156	0.143315	0.128613	2190	tags=25%, list=16%, signal=21%	RGS18/ATP6V1G1/DCP2/BTAF1/RAB8B/EIF4A2/RAP2A/RAB10/GNA13/CHD1/RAB11A/ARL8B/RASA1/PPA1/ARL5A/PSMC2/DHX15/RHOT1/RAB33B/GIMAP7/VPS4B/RAP1B/GNAI3/PSMC6/ABCB10/HSPE1/GTF2F2/RAB5A/HSPH1/ENPP4/ATAD1/RAP2C/RNGTT/CCT2/DDX1/HSPA8/SMARCA5/RHEB/RGS2/CHD9/DDX50/GNG11/HSPA14/RAB21/SAR1A/IFIH1/GNG10/GFM1/EEF1A1/RAB6A/HSP90B1/RALA/GBP1/SMCHD1/SPAST/SMC3/SMARCA2/SLFN11/DDX46/DDX21/DDX18/KIF2A/G3BP1/GNL2/DDX60/GBP…
GO:0030334	BP	regulation of cell migration	621	-0.329087	-1.36289	0.00515464	0.143315	0.128613	2315	tags=23%, list=17%, signal=20%	PIK3CG/ITGAX/JAM3/P2RX4/DOCK5/AMOTL2/MOSPD2/CTSH/SRC/ZP3/EPHA1/HACE1/LRRC15/ATP2B4/CORO1B/FBXW7/CLASP1/ST3GAL4/ZNF580/FUZ/AGER/ARHGDIB/PLXND1/IL27RA/CEACAM1/JUP/CD151/FGF23/FBXO31/TRIP6/IL1B/ENG/RCC2/PLVAP/MYADM/PTPN23/FUT7/MYD88/AAMP/CD99/SPATA13/HMOX1/TIRAP/ACTG1/MAP2K3/VCL/ELP3/TRADD/MET/PTK2B/SEMA4B/CRKL/RHOA/EVL/DUSP3/CRK/CD300A/PDPK1/DNAJA4/STX4/EMILIN2/HSPB1/NISCH/PECAM1/GNA12/BDKRB1/CD99L…
GO:0031967	CC	organelle envelope	876	0.355047	1.36252	0.00114679	0.143315	0.128613	2332	tags=27%, list=17%, signal=24%	COX7C/NDUFA4/TOMM7/UQCRQ/NDUFB3/RPS27A/COX7A2/CHMP5/RB1CC1/TMEM126B/BNIP2/ENY2/PPP1CC/LEMD3/NDUFB2/NDUFS4/COX7B/PRNP/NDUFA1/LDHB/ZMPSTE24/NDUFS5/MTMR6/PTGS2/MRPS18C/TMEM14B/TMEM126A/RPS6KB1/CRLS1/MRPL32/MRPL50/HIGD1A/XPO1/SIRT1/OGT/BNIP3L/MRPL3/KLHDC2/RHOT1/KPNA3/NDUFAB1/ATP11B/COX6C/SLC44A1/KPNA4/SDHD/TOR1AIP1/TOMM20/MRPS22/ABCB10/OSBPL8/NUP54/MRPL13/PNPLA8/RBM15/MTDH/ATAD1/MRPL33/SLC25A46/MRPL5…
GO:0031975	CC	envelope	876	0.355047	1.36252	0.00114679	0.143315	0.128613	2332	tags=27%, list=17%, signal=24%	COX7C/NDUFA4/TOMM7/UQCRQ/NDUFB3/RPS27A/COX7A2/CHMP5/RB1CC1/TMEM126B/BNIP2/ENY2/PPP1CC/LEMD3/NDUFB2/NDUFS4/COX7B/PRNP/NDUFA1/LDHB/ZMPSTE24/NDUFS5/MTMR6/PTGS2/MRPS18C/TMEM14B/TMEM126A/RPS6KB1/CRLS1/MRPL32/MRPL50/HIGD1A/XPO1/SIRT1/OGT/BNIP3L/MRPL3/KLHDC2/RHOT1/KPNA3/NDUFAB1/ATP11B/COX6C/SLC44A1/KPNA4/SDHD/TOR1AIP1/TOMM20/MRPS22/ABCB10/OSBPL8/NUP54/MRPL13/PNPLA8/RBM15/MTDH/ATAD1/MRPL33/SLC25A46/MRPL5…
GO:0040017	BP	positive regulation of locomotion	398	-0.339589	-1.35326	0.00401606	0.143315	0.128613	2478	tags=25%, list=19%, signal=21%	ICAM1/PIK3CG/ITGAX/JAM3/P2RX4/DOCK5/MOSPD2/CTSH/SRC/ZP3/EPHA1/LRRC15/CLASP1/ZNF580/AGER/CD151/FBXO31/TRIP6/IL1B/PLVAP/MYADM/ARTN/FUT7/AAMP/CD99/PHPT1/HMOX1/TIRAP/ACTG1/MAP2K3/ELP3/PGAM4/TRADD/MET/PTK2B/SEMA4B/CRKL/RHOA/CRK/PDPK1/STX4/HSPB1/PECAM1/BDKRB1/CD99L2/PFN1/ACTA2/RRAS/PLCG1/IL6R/SPOCK2/CXCL16/CD74/RAC2/HDAC6/DAB2/DAPK2/PLCG2/CORO1A/SP1/IQSEC1/NOTCH1/PPM1F/LYN/ADAM8/LGALS9/CALR/S100A11/ARH…
GO:0140535	CC	intracellular protein-containing complex	540	0.361767	1.35313	0.00125156	0.143315	0.128613	2294	tags=27%, list=17%, signal=23%	RBX1/PSMA6/CRBN/ENY2/YPEL5/BMI1/TAF7/DR1/UBE2E1/PSMA4/CUL5/UBE2N/DPM1/PRKAR1A/PSMD10/MORF4L1/KLHL9/FAM8A1/OGT/PSMC2/KLHDC2/FBXO33/PSMC6/FBXL3/FEM1C/DCUN1D5/KLHL2/ATG3/GTF2F2/ZZZ3/ANAPC13/PRKAA1/POLE4/PSMA2/RNF14/POLR3GL/PSMB1/UBE4A/MKLN1/DDX1/PPP3CB/UBE2V2/MORF4L2/KBTBD7/DERL1/PDE3B/KLHL24/PSMA3/MAP3K7/ACTL6A/GTF2E1/TBPL1/UBQLN1/PPP2R5E/GTF2B/KBTBD8/ANAPC4/ANAPC10/SPOPL/POLR2B/PPP2CA/UCHL5/DCUN1D…
GO:0030335	BP	positive regulation of cell migration	372	-0.339938	-1.35178	0.00378788	0.143315	0.128613	2478	tags=25%, list=19%, signal=21%	ICAM1/PIK3CG/ITGAX/JAM3/P2RX4/DOCK5/MOSPD2/CTSH/SRC/ZP3/EPHA1/LRRC15/CLASP1/ZNF580/AGER/CD151/FBXO31/TRIP6/IL1B/PLVAP/MYADM/FUT7/AAMP/CD99/HMOX1/TIRAP/ACTG1/MAP2K3/ELP3/TRADD/MET/PTK2B/SEMA4B/CRKL/RHOA/CRK/PDPK1/STX4/HSPB1/PECAM1/BDKRB1/CD99L2/PFN1/ACTA2/RRAS/PLCG1/IL6R/CXCL16/CD74/RAC2/HDAC6/DAB2/DAPK2/PLCG2/CORO1A/SP1/IQSEC1/NOTCH1/PPM1F/LYN/ADAM8/LGALS9/CALR/S100A11/ARHGEF2/FERMT3/STAT5A/MAP3K…
GO:0051272	BP	positive regulation of cellular component movement	393	-0.339026	-1.35155	0.00396825	0.143315	0.128613	2478	tags=25%, list=19%, signal=21%	ICAM1/PIK3CG/ITGAX/JAM3/P2RX4/DOCK5/MOSPD2/CTSH/SRC/ZP3/EPHA1/LRRC15/CLASP1/ZNF580/AGER/CD151/FBXO31/TRIP6/IL1B/PLVAP/MYADM/STK11/FUT7/AAMP/CD99/PHPT1/HMOX1/TIRAP/ACTG1/MAP2K3/ELP3/PGAM4/TRADD/MET/PTK2B/SEMA4B/CRKL/RHOA/CRK/PDPK1/STX4/HSPB1/PECAM1/BDKRB1/CD99L2/PFN1/ACTA2/RRAS/PLCG1/IL6R/SPOCK2/CXCL16/CD74/RAC2/HDAC6/DAB2/DAPK2/PLCG2/CORO1A/SP1/IQSEC1/NOTCH1/PPM1F/LYN/ADAM8/LGALS9/CALR/S100A11/AR…
GO:0017111	MF	nucleoside-triphosphatase activity	487	0.364815	1.34995	0.0025974	0.143315	0.128613	2190	tags=25%, list=16%, signal=22%	RGS18/ATP6V1G1/BTAF1/RAB8B/EIF4A2/RAP2A/RAB10/GNA13/CHD1/RAB11A/ARL8B/RASA1/ARL5A/PSMC2/DHX15/RHOT1/RAB33B/GIMAP7/VPS4B/RAP1B/GNAI3/PSMC6/ABCB10/HSPE1/GTF2F2/RAB5A/HSPH1/ATAD1/RAP2C/CCT2/DDX1/HSPA8/SMARCA5/RHEB/RGS2/CHD9/DDX50/GNG11/HSPA14/RAB21/SAR1A/IFIH1/GNG10/GFM1/EEF1A1/RAB6A/HSP90B1/RALA/GBP1/SMCHD1/SPAST/SMC3/SMARCA2/SLFN11/DDX46/DDX21/DDX18/KIF2A/G3BP1/GNL2/DDX60/GBP5/SMARCAD1/DHX36/KIF5B…
GO:1990234	CC	transferase complex	592	0.359235	1.34956	0.00125628	0.143315	0.128613	1777	tags=21%, list=13%, signal=19%	SNRPG/RBX1/SUZ12/CRBN/RB1CC1/PIGY/ENY2/YPEL5/BMI1/TAF7/DR1/UBE2E1/CUL5/UBE2N/DPM1/PRKAR1A/CLNS1A/MORF4L1/ERH/KLHL9/FAM8A1/CALM2/OGT/KLHDC2/CAB39/NSMCE4A/FBXO33/CCNG1/FBXL3/FEM1C/DCUN1D5/ORMDL1/KLHL2/ATG3/PIGA/GTF2F2/ZZZ3/ANAPC13/RBM15/PRKAA1/POLE4/RNF14/POLR3GL/UBE4A/MKLN1/CCNC/UBE2V2/CCNT2/MORF4L2/KBTBD7/DERL1/KLHL24/STT3B/MAP3K7/CCNG2/ACTL6A/GTF2E1/RABGGTB/TBPL1/GTF2B/KBTBD8/ANAPC4/ANAPC10/SPOP…
GO:0000278	BP	mitotic cell cycle	645	0.355884	1.34825	0.00121359	0.143315	0.128613	2330	tags=24%, list=17%, signal=20%	RPL26/ANXA1/RPL24/CHMP5/CUL5/ZMPSTE24/ANGEL2/RPS6/RAB11A/TMEM14B/RPS6KB1/HECA/VCPIP1/RASA1/PPP1R12A/ZFP36L1/CALM2/BUB3/SIRT1/DYNLT3/RPS27L/VPS4B/E2F3/CCNG1/FBXL3/NAE1/STAG2/MIS12/PTPN11/AZI2/RPA3/MITD1/RIOK2/PLRG1/CHMP2B/CHMP1B/LSM14A/NUP88/SMARCA5/SETDB2/CCNG2/EML4/ANAPC4/PPP2CA/UBA3/CRLF3/MYC/SPAST/SMC3/KHDRBS1/RNASEH2B/SBDS/PDCD6IP/YEATS4/SLFN11/CDKN1B/RRM2B/ACVR1/PDS5A/NSL1/TRIAP1/KIF2A/SDCBP…
GO:2000147	BP	positive regulation of cell motility	385	-0.339825	-1.34704	0.00404858	0.143315	0.128613	2478	tags=25%, list=19%, signal=21%	ICAM1/PIK3CG/ITGAX/JAM3/P2RX4/DOCK5/MOSPD2/CTSH/SRC/ZP3/EPHA1/LRRC15/CLASP1/ZNF580/AGER/CD151/FBXO31/TRIP6/IL1B/PLVAP/MYADM/FUT7/AAMP/CD99/PHPT1/HMOX1/TIRAP/ACTG1/MAP2K3/ELP3/PGAM4/TRADD/MET/PTK2B/SEMA4B/CRKL/RHOA/CRK/PDPK1/STX4/HSPB1/PECAM1/BDKRB1/CD99L2/PFN1/ACTA2/RRAS/PLCG1/IL6R/SPOCK2/CXCL16/CD74/RAC2/HDAC6/DAB2/DAPK2/PLCG2/CORO1A/SP1/IQSEC1/NOTCH1/PPM1F/LYN/ADAM8/LGALS9/CALR/S100A11/ARHGEF2/…
GO:0040012	BP	regulation of locomotion	687	-0.325248	-1.34543	0.00564972	0.143315	0.128613	2454	tags=23%, list=18%, signal=19%	PIK3CG/ITGAX/JAM3/P2RX4/DOCK5/FBXO7/AMOTL2/MOSPD2/CTSH/SRC/ZP3/EPHA1/HACE1/LRRC15/ATP2B4/CORO1B/FBXW7/CLASP1/ST3GAL4/ZNF580/FUZ/AGER/ARHGDIB/PLXND1/IL27RA/CEACAM1/JUP/CD151/FGF23/FBXO31/TRIP6/IL1B/ENG/RCC2/PLVAP/MYADM/ARTN/PTPN23/FUT7/MYD88/AAMP/CD99/PHPT1/SPATA13/HMOX1/TIRAP/ACTG1/MAP2K3/VCL/ELP3/PGAM4/TRADD/MET/PTK2B/SEMA4B/CRKL/RHOA/EVL/DUSP3/CRK/CD300A/PDPK1/DNAJA4/STX4/EMILIN2/HSPB1/NISCH/PE…
GO:0008047	MF	enzyme activator activity	390	-0.336908	-1.34213	0.00395257	0.143315	0.128613	2401	tags=29%, list=18%, signal=24%	SIPA1L1/DOCK5/CARD8/RANBP3/TBC1D13/CTSH/SRC/GAPVD1/RASA3/PARP16/FBXW7/BRPF1/ARHGDIB/UBE2L3/SGSM2/TBC1D14/SGSM3/MAP3K12/GIT1/ARHGDIG/TBC1D16/ARFGAP1/ATP2A3/CASP9/STK11/CALM1/MADD/TCL1B/FYN/ARHGAP26/APH1A/TBCD/TBC1D2/CCNY/RGS14/RING1/NOXO1/RIN1/MYO9A/TBC1D22B/LTF/NCF1B/ARHGAP9/ARRB1/CDKN1A/PDPK1/PITRM1/STX4/ARFGAP2/GM2A/TBC1D3G/NLRP1/APH1B/TAOK1/CCNK/RALBP1/TBC1D17/PSME3/CDC42EP2/PPP1R15A/ADRM1/TBC…
GO:0002252	BP	immune effector process	474	-0.32987	-1.33744	0.00429185	0.143315	0.128613	2574	tags=30%, list=19%, signal=25%	MAD2L2/CD22/CD27/TNFRSF14/HLA-H/RIPK3/ICAM1/LAT2/PIK3CG/NLRP3/IGLL1/ZBTB7B/HLA-DRB3/PRKCZ/CTSH/SRC/ZP3/C1RL/KIR3DL1/GZMM/EOMES/LTA/AGER/IL27RA/LFNG/MPO/CEACAM1/GAB2/HLA-DRB4/SLC15A4/IL1B/HLA-F/TREM1/ZNF683/NFKBID/VSIG4/FUT7/MYD88/FYN/IL10/TP53/CD84/HMOX1/LAG3/GNL1/SERPING1/FCER1G/RELB/PTK2B/LILRA2/AP1G1/ARRB2/CRK/CD300A/PDPK1/SPHK2/STX4/TYROBP/P2RX7/IL4R/BTN3A2/IL18/TICAM1/HLA-E/LCP1/SUPT6H/TCIRG…
GO:0051345	BP	positive regulation of hydrolase activity	411	-0.332223	-1.33308	0.004	0.143315	0.128613	2538	tags=30%, list=19%, signal=25%	NLRP2/PREX1/MEFV/RIPK3/TIAM2/AGRN/BAK1/RASGRP4/NLRP3/CD33/SIPA1L1/CARD8/TBC1D13/PRKCZ/CTSH/EPHA1/HSPA1A/CCL23/AGER/SGSM2/TBC1D14/SGSM3/RCN3/RCC2/NDUFA13/TBC1D16/ATP2A3/CASP9/CALM1/NDEL1/FYN/GSN/APH1A/TBC1D2/S100A10/CIDEB/RGS14/RGL2/RGMA/MYO9A/TBC1D22B/PTK2B/CRKL/RHOA/HSP90AB1/CRK/RAPGEF1/CD300A/PDPK1/TGM2/TBC1D3G/MBP/BAX/NLRP1/RASGRP2/GNA12/APH1B/BOK/DAP/RALBP1/TBC1D17/PSME3/RGL4/PPP1R15A/FIS1/AD…
GO:0071345	BP	cellular response to cytokine stimulus	595	-0.321766	-1.32886	0.00487805	0.143315	0.128613	2333	tags=26%, list=17%, signal=23%	RNF185/GIPC1/SRC/MT1X/HSPA1A/PAFAH1B1/SH2B3/SHPK/PARP16/SMPD4/CCL23/AGPAT2/JARID2/IL27RA/CEACAM1/LILRA5/FGF23/LILRB2/GBP4/VPS26B/IL1B/NDUFA13/PLVAP/VIM/JAK1/RAB43/MYD88/GSN/CRLF2/IFITM3/IFNAR1/STAT2/OAS1/SIGIRR/IL10RA/MPL/TP53/NKIRAS2/ACTG1/EXT1/IL2RB/CD300LF/IRF1/TRIM44/CYBA/TRADD/MX1/FCER1G/ADIPOR2/PTK2B/TOLLIP/KLF2/LILRA2/CRKL/CEBPA/RHOA/BCAT2/HSP90AB1/CDK9/STX4/IRAK1/IKBKB/IL4R/SLC26A6/IL18/S…
GO:0034097	BP	response to cytokine	670	-0.319839	-1.32369	0.00555556	0.143315	0.128613	2333	tags=26%, list=17%, signal=23%	RNF185/GIPC1/MAP2K7/SRC/MT1X/HSPA1A/PAFAH1B1/SH2B3/SHPK/PARP16/SMPD4/CCL23/AGPAT2/JARID2/IL27RA/XAF1/CEACAM1/AVPR2/LILRA5/FGF23/LILRB2/GBP4/VPS26B/IL1B/NDUFA13/PLVAP/VIM/JAK1/RAB43/MYD88/GSN/CRLF2/NUB1/IFITM3/IFNAR1/STAT2/OAS1/SIGIRR/IL10RA/MPL/TP53/MAPKAPK2/EIF2AK2/NKIRAS2/ACTG1/EXT1/IL2RB/SMPD1/CD300LF/IRF1/TRIM44/CYBA/TRADD/MX1/FCER1G/ADIPOR2/RELB/PTK2B/TOLLIP/KLF2/LILRA2/CRKL/CEBPA/RHOA/BCAT2…
GO:0070647	BP	protein modification by small protein conjugation or removal	759	0.3473	1.32368	0.00119617	0.143315	0.128613	2290	tags=25%, list=17%, signal=22%	RPL23/HINT1/PCNP/RBX1/RPL5/RPS27A/SUZ12/CRBN/PJA2/ENY2/BMI1/TAF7/UBE2E1/USP15/CUL5/RPL11/DNAJA1/UBE2Q2/UBE2N/VCPIP1/PSMD10/PTPN22/KLHL9/BUB3/SIRT1/OGT/KLHDC2/COPS5/TRIM22/RPS20/FBXO33/WSB1/UBA6/FBXL3/FEM1C/NAE1/DCUN1D5/COPS4/KLHL2/ATG3/PELI1/STAMBPL1/ANAPC13/NFE2L2/USP38/RNF14/UBE4A/SENP6/GNL3/HERC4/MEX3C/CAMLG/UFM1/UBE2V2/KBTBD7/NDFIP1/BIRC3/DERL1/KLHL24/TRIP12/UBQLN1/IFIH1/NMI/KBTBD8/ANAPC4/ZNF…
GO:0004672	MF	protein kinase activity	422	-0.33023	-1.32106	0.00429185	0.143315	0.128613	2605	tags=28%, list=19%, signal=23%	CDK5/GRK5/EPHB4/RAF1/EFNA4/BRD4/PASK/RIPK3/AKAP13/PRKAB1/PIK3CG/STK40/RPS6KL1/PRKCZ/MAP2K7/SRC/ALPK1/EPHA1/RASSF2/LATS2/LTBP4/PRKY/MAP3K14/MARK3/STK35/MAP3K12/ENG/AATK/RPS6KB2/NUAK2/STK11/JAK1/FGFRL1/PPP1R9B/FYN/BRD2/STK38/CAMK1/PAK4/EPHA8/MAPKAPK2/EIF2AK2/STK36/RIPK4/SBK1/MAP2K3/ADCK1/MET/PTK2B/CLK3/PDK3/STK19/PHKG2/RPS6KA1/CDK9/CDKN1A/PDPK1/TESK1/IRAK1/NME2/ULK1/IKBKB/CSNK1D/NRK/EPHB6/TAOK1/RPS…
GO:0000902	BP	cell morphogenesis	694	-0.318094	-1.31873	0.00558659	0.143315	0.128613	1934	tags=20%, list=14%, signal=18%	RCC2/ASXL1/MYADM/ARTN/CASP9/STK11/ROBO3/NDEL1/FYN/B4GALT5/VHL/TBCD/S100A10/GORASP1/EPHA8/MPL/MEGF9/SH3KBP1/SSH1/EXT1/EPB41/MYO9A/VCL/MET/PTK2B/KLF2/SPTBN4/SEMA4B/CRKL/NCAM1/DBN1/RHOA/ACTB/HSP90AB1/CRK/VASP/BIN3/TESK1/ARHGEF18/KEL/ULK1/P2RX7/RHOF/EP300/MBP/GNA12/NRK/EPHB6/PLOD3/TAOK1/BCL9L/ABI3/SIN3A/KIF13B/PACSIN2/CDC42EP2/LYPLA2/EIF2AK4/FZD7/CTTN/RNF165/ADORA2A/TBC1D20/SRF/LLGL1/P4HB/PXN/FLNA/TA…
GO:0034330	BP	cell junction organization	446	-0.326738	-1.31526	0.00420168	0.143315	0.128613	2442	tags=20%, list=18%, signal=17%	JAM3/COLQ/SIPA1L1/RAMP2/SRC/ARF1/PAFAH1B1/GJC1/CLSTN1/CLASP1/CLDN14/CDH9/PTPRA/PLXND1/JUP/PICK1/EIF4G1/LILRB2/TRIP6/SDF4/IL1B/PCDHB9/RCC2/PTPN23/FYN/TBCD/S100A10/CAMK1/TUBA1A/IL10/IL10RA/ZDHHC12/LRFN3/ACTG1/EXT1/MYO9A/VCL/PTK2B/CRKL/DBN1/RHOA/ACTB/ESAM/DUSP3/RAPGEF1/IKBKB/PECAM1/GRIPAP1/DCTN1/ABI3/PFN1/CLN3/CTTN/SPOCK2/OCEL1/SRF/FLNA/TAOK2/SLITRK1/HDAC6/CLDN5/FSCN1/DISC1/CTNNA1/GPC6/IQSEC1/ARL2/D…
GO:0045321	BP	leukocyte activation	703	-0.31665	-1.31512	0.00561798	0.143315	0.128613	2099	tags=26%, list=16%, signal=23%	IL27RA/LFNG/SOX13/CEACAM1/GAB2/HLA-DRB4/CD151/LILRB2/NCAPH2/SLC15A4/IL1B/MAD1L1/HLA-F/ZNF683/NFKBID/STK11/VSIG4/CMTM7/FUT7/MICB/CARD11/ZMIZ1/MYD88/FYN/CD6/GSN/MFHAS1/CRLF2/CD320/IL10/CD5/MPL/TP53/NFAM1/CD84/KDELR1/HMOX1/LAG3/SH3KBP1/SIRPB1/TIRAP/IL2RB/CD300LF/IRF1/FCER1G/RELB/PTK2B/TOLLIP/LILRA2/LTBR/AP1G1/CEBPA/RHOA/TSPAN32/AP3D1/DUSP3/CDKN1A/CD300A/PDPK1/DHPS/SPHK2/STX4/TYROBP/P2RX7/IL4R/EP300/…
GO:0022603	BP	regulation of anatomical structure morphogenesis	630	-0.316314	-1.31043	0.00531915	0.143315	0.128613	2450	tags=23%, list=18%, signal=19%	ITGAX/ZRANB1/FGD2/PARVB/SIPA1L1/DOCK5/RAMP2/HUWE1/CTSH/SRC/EPHA1/PAFAH1B1/ATP2B4/CORO1B/CLASP1/INF2/FUZ/PLXND1/LFNG/CEACAM1/JUP/FBXO31/TRIOBP/TBX18/IL1B/ENG/RCC2/MYADM/STK11/JAK1/NDEL1/FYN/S100A10/GORASP1/PAK4/STAT2/IL10/MPL/HMOX1/SH3KBP1/ADCK1/EPB41/MYO9A/PTK2B/KLF2/SEMA4B/CRKL/DBN1/RHOA/CRK/PDPK1/TESK1/ARHGEF18/EMILIN2/KEL/ULK1/RHOF/HSPB1/MBP/GNA12/TMBIM1/STIM1/BCL9L/VASH1/ABI3/RALBP1/RRAS/KIF1…
GO:0008289	MF	lipid binding	533	-0.321101	-1.30891	0.00490196	0.143315	0.128613	2091	tags=22%, list=16%, signal=20%	TPCN2/GGA2/GAB2/FCGR3B/PICK1/PLCD1/SNX22/CHMP2A/ATP1A1/MFGE8/NFE2L1/ZFYVE19/CDIPT/MAP1LC3A/PIK3C2B/CD6/CADPS/GSN/ARHGAP26/NUMA1/ATP13A2/AP2A2/NOXO1/SNX8/TIRAP/ANXA11/CD300LF/EPB41/ANXA2/ATP1A3/LTF/TOM1/NCF1B/ICA1/PLEKHB2/SPTBN4/ARHGAP9/NUP62/PHF12/GSTM2/UNC119/CD300A/BIN3/HS1BP3/P2RX7/OXER1/PLEK2/RAB35/BAX/NISCH/RASGRP2/PFN1/NSFL1C/PITPNC1/PACSIN2/SPTBN1/LDLRAP1/FZD7/CLN3/GRAMD1A/SNX17/GBF1/PLEKH…
GO:1903047	BP	mitotic cell cycle process	537	0.350101	1.30789	0.00252207	0.143315	0.128613	2330	tags=24%, list=17%, signal=20%	RPL26/ANXA1/RPL24/CHMP5/CUL5/ZMPSTE24/RPS6/RAB11A/TMEM14B/RPS6KB1/RASA1/ZFP36L1/CALM2/BUB3/RPS27L/VPS4B/E2F3/CCNG1/FBXL3/NAE1/STAG2/MIS12/MITD1/RIOK2/PLRG1/CHMP2B/CHMP1B/LSM14A/SMARCA5/CCNG2/EML4/ANAPC4/PPP2CA/CRLF3/MYC/SPAST/SMC3/KHDRBS1/RNASEH2B/SBDS/PDCD6IP/SLFN11/CDKN1B/RRM2B/ACVR1/PDS5A/NSL1/TRIAP1/KIF2A/CKS2/PDS5B/DYNLT1/LPIN1/CCNH/AIF1/CLASP2/DCTN6/NSMCE2/RAN/PKD2/SYF2/ROCK1/PTEN/CENPK/VRK…
GO:0030155	BP	regulation of cell adhesion	571	-0.317097	-1.30165	0.00487805	0.143315	0.128613	2454	tags=25%, list=18%, signal=22%	PIK3CG/JAM3/CBLB/NLRP3/LAX1/GP6/DOCK5/ZBTB7B/HLA-DRB3/PRKCZ/SRC/ZP3/TFE3/EPHA1/SH2B3/CLASP1/ST3GAL4/AGER/ARHGDIB/PTPRA/PLXND1/IL27RA/SOX13/CEACAM1/JUP/HLA-DRB4/LILRB2/TRIOBP/IL1B/MAD1L1/RCC2/ARHGDIG/MYADM/NFKBID/PTPN23/VSIG4/JAK1/FUT7/CARD11/ZMIZ1/FYN/CD6/TBCD/S100A10/IL10/EPHA8/CD5/LAG3/SIRPB1/LRFN3/ACTG1/IRF1/VCL/FXYD5/PTK2B/CRKL/RHOA/AP3D1/DUSP3/CRK/CD300A/TESK1/DHPS/STX4/EMILIN2/IRAK1/IL4R/TG…
GO:0019904	MF	protein domain specific binding	521	-0.319888	-1.30158	0.0049505	0.143315	0.128613	2105	tags=23%, list=16%, signal=20%	PLXND1/E2F4/U2AF2/DFFA/PICK1/PRKAR2A/CHMP2A/PMF1/IL1B/RCC2/CASP9/VIM/STK11/CALM1/VPS4A/CARD11/MYD88/FYN/NUMA1/TP53/AP2A2/SH3KBP1/ZNF653/STUB1/HIF1AN/SKI/CYBA/TRADD/ICA1/RAD9A/AIP/NUP62/DDB1/RHOA/EVL/HSP90AB1/ARRB2/CRK/RAPGEF1/VASP/GNG5/SLC26A6/FHOD1/BAX/NLRP1/TRIM11/BOK/JDP2/DAP/ABI3/SRP68/FZD7/IKBKG/CALCOCO1/STRN4/YWHAB/SH2B2/GUSB/HDAC1/RELA/MAP3K5/PINK1/TNK2/HCLS1/ETV6/KCTD13/SP1/GTF2F1/CALM3/D…
GO:0006954	BP	inflammatory response	573	-0.316435	-1.30057	0.00480769	0.143315	0.128613	1877	tags=21%, list=14%, signal=18%	NFKBID/METRNL/FUT7/DAGLB/MYD88/FYN/CD6/MFHAS1/IL10/SIGIRR/NFKBIB/NFAM1/MAPKAPK2/NKIRAS2/HMOX1/TIRAP/EXT1/MAP2K3/PRDX5/CYBA/TRADD/RELB/TOLLIP/CEBPA/CD163/PSTPIP1/TYROBP/IKBKB/P2RX7/IL4R/IL18/NLRP1/BDKRB1/TICAM1/HLA-E/RPS6KA4/ABCD1/AOAH/TLR5/TCIRG1/PLCG1/LAT/ZBP1/CUEDC2/ALOX5/IKBKG/STAT5B/IL6R/NLRX1/ADORA2A/SCYL1/ADA/RELA/ALOX5AP/NKG7/NFKB1/NCR3/BAP1/GSTP1/PLCG2/NR1D1/HCK/NOTCH1/FCGR3A/RIPK1/SNCA/L…
GO:0019901	MF	protein kinase binding	526	-0.317506	-1.29199	0.00497512	0.143315	0.128613	2501	tags=29%, list=19%, signal=24%	PRKAB1/IRF5/SV2A/DUSP2/ITGAX/CBLB/CD247/LAX1/ELMO2/GP6/PIH1D1/FBXO7/DCTN2/PRKCZ/MAP2K7/SRC/EPHA1/SH2B3/VDAC1/ATP2B4/LRBA/TPCN2/CEACAM1/JUP/GAB2/PICK1/TBC1D14/MAP3K12/PRKAR2A/RCC2/DOK2/ARTN/CASP9/PTPN23/CEACAM4/CALM1/TFPT/CRY2/TCL1B/CD6/CADPS/AP1B1/STK38/PGAM1/CCNY/B3GALT4/USF1/TP53/AP2A2/TRAP1/MAPKAPK2/RGS14/ADCY4/ZBTB4/TIRAP/MAP2K3/EEF2/SKI/TUBA4A/TRADD/RELB/PTK2B/RAD9A/CRKL/RHOA/ACTB/HSP90AB1/P…
GO:0051336	BP	regulation of hydrolase activity	689	-0.312116	-1.29197	0.00564972	0.143315	0.128613	2588	tags=28%, list=19%, signal=24%	TBC1D22A/RAF1/SERPINB6/CD27/NLRP2/PREX1/PCSK5/MEFV/RIPK3/TIAM2/AGRN/BAK1/RASGRP4/CBLB/FGD2/NLRP3/CD33/SIPA1L1/PIH1D1/APLP2/CARD8/TBC1D13/PRKCZ/CTSH/SRC/EPHA1/HSPA1A/PAFAH1B1/GAPVD1/FICD/RASA3/CCL23/PBXIP1/AGER/PLXND1/DFFA/SGSM2/TRAPPC6A/TBC1D14/SGSM3/RCN3/RCC2/NDUFA13/TBC1D16/ATP2A3/CASP9/CALM1/CRY2/NDEL1/PPP1R9B/FYN/GSN/APH1A/SERPINA10/TBC1D2/ATP13A2/S100A10/CIDEB/OAS1/RGS14/RGL2/RGMA/SERPING1/M…
GO:0045087	BP	innate immune response	583	-0.31267	-1.28889	0.00485437	0.143315	0.128613	1922	tags=26%, list=14%, signal=23%	HLA-F/TREM1/VIM/ZNF683/VSIG4/JAK1/RAB43/MYD88/FYN/CD6/GSN/MFHAS1/NUB1/CCDC92/UNC93B1/FAM3A/IFITM3/IFNAR1/STAT2/OAS1/TP53/CD84/EIF2AK2/RNASE6/LAG3/TIRAP/SERPING1/ACTG1/SMPD1/IRF1/ISG20/LTF/CYBA/RBM14/MX1/FCER1G/RELB/PTK2B/TOLLIP/LILRA2/AP1G1/HSP90AB1/ARRB2/CRK/TRIM8/STX4/POLR3A/PSTPIP1/IRAK1/TYROBP/IKBKB/SLC26A6/MARCO/EP300/IL18/NLRP1/TICAM1/TRIM11/PARP14/TRIM41/CDC37/HLA-E/SIN3A/OASL/TLR5/ZBP1/CD…
GO:0030097	BP	hemopoiesis	662	-0.312041	-1.28678	0.00564972	0.143315	0.128613	2532	tags=27%, list=19%, signal=23%	PREX1/GON4L/DHRS7B/RIPK3/PLA2G2D/CEBPB/JUNB/BAK1/JAM3/RASGRP4/NLRP3/CEBPE/ZBTB7B/FBXO7/PRKCZ/TOB2/SRC/KLF6/TFE3/RASSF2/HSPA1A/PAFAH1B1/SH2B3/ROGDI/EOMES/FBXW7/IKZF3/PBXIP1/AGER/LFNG/SOX13/CEACAM1/GAB2/ARMC6/LILRB2/GLRX5/NCOA6/NCAPH2/IL1B/ASXL1/CASP9/ZNF683/NFKBID/STK11/JAK1/CMTM7/FUT7/CARD11/ZMIZ1/MFHAS1/ASH2L/IL10/ERCC2/MPL/TP53/NFAM1/PABPC4/KDELR1/EIF2AK2/SLC25A38/LAG3/TIRAP/EXT1/EEF2/IRF1/ANXA…
GO:0050776	BP	regulation of immune response	637	-0.310868	-1.28471	0.00540541	0.143315	0.128613	1877	tags=24%, list=14%, signal=22%	NFKBID/STK11/VSIG4/FUT7/TAPBPL/MICB/CARD11/MYD88/FYN/MFHAS1/EIF2B4/UNC93B1/FAM3A/STAT2/IL10/OAS1/NFAM1/CD84/MAPKAPK2/PHPT1/HMOX1/LAG3/TIRAP/SERPING1/CD300LF/ZDHHC5/IRF1/LTF/CYBA/RBM14/FCER1G/LILRA2/CRKL/AP1G1/HSP90AB1/DUSP3/ARRB2/CRK/CD300A/PDPK1/SPHK2/STX4/IRAK1/TYROBP/IKBKB/P2RX7/IL4R/BTN3A2/EP300/IL18/BAX/TICAM1/PARP14/TRIM41/CDC37/HLA-E/FCGR2A/SIN3A/OASL/SUPT6H/TLR5/PLCG1/ZBP1/EIF2AK4/IKBKG/P…
GO:0048534	BP	hematopoietic or lymphoid organ development	693	-0.309959	-1.28361	0.00564972	0.143315	0.128613	2631	tags=28%, list=20%, signal=23%	RUNX1/PLD4/FARP2/HAND2/RAF1/CD27/ZNF784/PREX1/GON4L/DHRS7B/RIPK3/PLA2G2D/CEBPB/JUNB/BAK1/JAM3/RASGRP4/NLRP3/CEBPE/ZBTB7B/FBXO7/PRKCZ/TOB2/SRC/KLF6/TFE3/RASSF2/HSPA1A/PAFAH1B1/SH2B3/ROGDI/EOMES/FBXW7/IKZF3/LTA/PBXIP1/AGER/JARID2/LFNG/SOX13/CEACAM1/GAB2/ARMC6/LILRB2/GLRX5/NCOA6/NCAPH2/IL1B/MAD1L1/ASXL1/ARTN/CASP9/ZNF683/NFKBID/STK11/JAK1/CMTM7/FUT7/CARD11/ZMIZ1/MFHAS1/ASH2L/IL10/ERCC2/MPL/TP53/NFAM…
GO:0016772	MF	transferase activity, transferring phosphorus-containing groups	649	-0.30918	-1.27838	0.00549451	0.143315	0.128613	2605	tags=26%, list=19%, signal=22%	CDK5/GRK5/EPHB4/RAF1/EFNA4/BRD4/PASK/RIPK3/AKAP13/PRKAB1/PIK3CG/PIP4K2C/STK40/CHRAC1/RPS6KL1/PRKCZ/MAP2K7/FKTN/SRC/ALPK1/EPHA1/RASSF2/PAPSS2/SHPK/LATS2/LTBP4/DOLK/FICD/PI4KAP1/UAP1L1/GLYCTK/PRKY/MAP3K14/MARK3/DPAGT1/POLRMT/STK35/MAP3K12/ENG/GALT/AATK/CDIPT/FLAD1/RPS6KB2/NUAK2/STK11/JAK1/FGFRL1/CARD11/PPP1R9B/FYN/PIK3C2B/BRD2/STK38/CAMK1/PAK4/OAS1/EPHA8/MAPKAPK2/EIF2AK2/STK36/NAGK/POLR1D/POLR2I/RI…
GO:0002684	BP	positive regulation of immune system process	647	-0.30791	-1.27169	0.00561798	0.143315	0.128613	1877	tags=22%, list=14%, signal=20%	NFKBID/STK11/VSIG4/FUT7/MICB/CARD11/ZMIZ1/MYD88/FYN/CD6/CRLF2/CD99/EIF2B4/CD320/IL10/CD5/MPL/NFAM1/CD84/PHPT1/HMOX1/LAG3/SH3KBP1/SIRPB1/TIRAP/SERPING1/RBM14/FCER1G/PTK2B/LILRA2/CRKL/AP1G1/CEBPA/RHOA/AP3D1/DUSP3/CDKN1A/CD300A/PDPK1/DHPS/SPHK2/STX4/TYROBP/IKBKB/P2RX7/IL4R/BTN3A2/EP300/IL18/BAX/BDKRB1/CD99L2/TICAM1/TRIM41/SOX12/HLA-E/SIN3A/PLCG1/ZBP1/HLA-DMA/EIF2AK4/IKBKG/STAT5B/IL6R/SH2B2/ADA/CD74/…
GO:0051241	BP	negative regulation of multicellular organismal process	680	-0.307197	-1.26981	0.00564972	0.143315	0.128613	2142	tags=20%, list=16%, signal=18%	FUZ/AGER/ARHGDIB/JARID2/IL27RA/NFIB/CEACAM1/AVPR2/JUP/LILRA5/SIRT2/FGF23/GPATCH3/ATP1A1/GIT1/TBX18/IL1B/HLA-F/PTPN23/STK11/VSIG4/CRY2/ASCL2/GORASP1/IL10/OAS1/SIGIRR/USF1/TP53/CD84/HMOX1/LAG3/CTDSP1/SERPING1/IRF1/SKI/LTF/CYBA/RELB/PTK2B/LRPAP1/KLF2/SPTBN4/SEMA4B/ARRB1/CTDP1/RHOA/EVL/HSP90AB1/ARRB2/DNAJA4/TYROBP/ULK1/P2RX7/IL4R/MBP/TRIM11/RPS6KA4/VASH1/ABCD1/TMEM176B/YY1/CUEDC2/FZD7/ALOX5/NLRX1/SRF…
GO:0032446	BP	protein modification by small protein conjugation	666	0.331423	1.25812	0.00485437	0.143315	0.128613	2288	tags=24%, list=17%, signal=21%	RPL23/PCNP/RBX1/RPL5/RPS27A/SUZ12/CRBN/PJA2/BMI1/UBE2E1/CUL5/RPL11/DNAJA1/UBE2Q2/UBE2N/VCPIP1/PSMD10/PTPN22/KLHL9/BUB3/SIRT1/OGT/KLHDC2/TRIM22/RPS20/FBXO33/WSB1/UBA6/FBXL3/FEM1C/NAE1/DCUN1D5/KLHL2/ATG3/PELI1/ANAPC13/NFE2L2/RNF14/UBE4A/SENP6/GNL3/HERC4/MEX3C/CAMLG/UFM1/UBE2V2/KBTBD7/NDFIP1/BIRC3/DERL1/KLHL24/TRIP12/UBQLN1/IFIH1/NMI/KBTBD8/ANAPC4/ZNF451/PRMT3/ANAPC10/RNF138/SPOPL/DCUN1D4/UBA3/MKRN2…
GO:0005178	MF	integrin binding	112	-0.471456	-1.63139	0.00568182	0.143547	0.128821	2478	tags=27%, list=19%, signal=22%	ICAM1/ITGAX/JAM3/SRC/LTBP4/VWF/CD151/MFGE8/IL1B/ITGB5/ICAM2/LGALS12/NISCH/LCP1/P4HB/LYN/CALR/ITGB2/ITGB7/FERMT3/ITGAM/ICAM3/ITGAL/ITGA2B/SYK/ITGA5/MYH9/ACTN4/TLN1/ACTN1
GO:0008064	BP	regulation of actin polymerization or depolymerization	113	-0.456509	-1.58216	0.00569801	0.143547	0.128821	1455	tags=31%, list=11%, signal=28%	PTK2B/SPTBN4/DBN1/RHOA/EVL/ESAM/VASP/PFN1/SPTBN1/SSH3/CDC42EP2/CTTN/BIN1/TWF2/HCLS1/CORO1A/HCK/ARPC1B/CDC42EP4/DBNL/GRB2/ADD1/WDR1/COTL1/TMOD1/NCKAP1L/PYCARD/SPTAN1/ARPC4/FLII/CAPZB/CYFIP2/WAS/SH3BP1/SSH2
GO:0045333	BP	cellular respiration	149	0.44907	1.50697	0.00589971	0.148119	0.132924	2524	tags=36%, list=19%, signal=30%	COX7C/NDUFA4/UQCRQ/NDUFB3/COX7A2/NDUFB2/NDUFS4/NDUFA1/NDUFS5/MDH1/NDUFAB1/SDHD/NDUFB5/COQ10B/CHCHD2/UQCRC2/DNAJC15/MYC/HIF1A/SUCLG2/PARK7/DLD/GHITM/ETFA/BNIP3/IFNG/SLC25A13/CISD1/ATP7A/BID/SUCLA2/UQCRB/DLAT/BLOC1S1/CAT/MTFR1/UQCRH/SUCLG1/NDUFV2/PDE12/COX6A1/IDH1/UQCRFS1/PNPT1/NDUFS3/MRPS36/NDUFA8/ADSL/IMMP2L/PDHB/NDUFC1/NDUFB7/FH/SLC25A12
GO:0030016	CC	myofibril	147	-0.400552	-1.43901	0.0060241	0.149704	0.134346	2407	tags=25%, list=18%, signal=21%	PARVB/PGM5/ARF1/TPM4/ATP2B4/LMAN1/JUP/STK11/CALM1/FHL2/MYBPC3/ACTG1/STUB1/VCL/HSPB1/MYOM2/MYL4/SPTBN1/MYL9/BIN1/FLNA/TWF2/CALM3/PDLIM1/CSRP1/TMOD1/SCO2/PAK1/SQSTM1/FKBP1A/FHL3/CAPZB/ENO1/PDLIM7/ACTN4/SLC4A1/ACTN1
GO:0098542	BP	defense response to other organism	748	-0.304954	-1.27135	0.0060241	0.149704	0.134346	1884	tags=24%, list=14%, signal=22%	VIM/ZNF683/VSIG4/JAK1/RNF26/MICB/RAB43/MYD88/FYN/CD6/GSN/MFHAS1/NUB1/CCDC92/UNC93B1/FAM3A/IFITM3/IFNAR1/STAT2/IL10/OAS1/TP53/CD84/EIF2AK2/RNASE6/LAG3/TIRAP/SERPING1/ACTG1/SMPD1/IRF1/ISG20/TRIM44/LTF/CYBA/RBM14/IRF9/MX1/FCER1G/RELB/PTK2B/TOLLIP/LILRA2/AP1G1/TSPAN32/HSP90AB1/ARRB2/CRK/TRIM8/STX4/POLR3A/PSTPIP1/EMILIN2/IRAK1/TYROBP/IKBKB/P2RX7/IL4R/SLC26A6/MARCO/EP300/IL18/NLRP1/TICAM1/TRIM11/PARP14…
GO:0002520	BP	immune system development	735	-0.301518	-1.25295	0.0060241	0.149704	0.134346	2631	tags=27%, list=20%, signal=23%	RUNX1/PLD4/FARP2/HAND2/RAF1/MAD2L2/CD27/ZNF784/PREX1/GON4L/DHRS7B/RIPK3/PLA2G2D/CEBPB/JUNB/BAK1/JAM3/RASGRP4/CBLB/NLRP3/CEBPE/ZBTB7B/FBXO7/MCM3AP/PRKCZ/TOB2/SRC/KLF6/TFE3/RASSF2/HSPA1A/PAFAH1B1/SH2B3/ROGDI/EOMES/FBXW7/IKZF3/LTA/PBXIP1/AGER/JARID2/IL27RA/LFNG/SOX13/CEACAM1/GAB2/ARMC6/LILRB2/GLRX5/NCOA6/NCAPH2/SLC15A4/IL1B/MAD1L1/ASXL1/ARTN/CASP9/ZNF683/NFKBID/STK11/JAK1/CMTM7/FUT7/CARD11/ZMIZ1/MFH…
GO:0071824	BP	protein-DNA complex subunit organization	129	0.457605	1.49869	0.00609756	0.150004	0.134616	1425	tags=22%, list=11%, signal=20%	RPL23/TAF7/ACTR6/DR1/CHD1/NAP1L1/PSMC6/MIS12/ASF1A/HMGB2/SENP6/SET/SMARCA5/GTF2E1/GTF2B/MYC/RRN3/HMGB1/SMARCE1/SHPRH/TAF5/GTF2H5/CAND1/CENPK/RB1/DNAJC9/GTF2A2/TAF2
GO:0099503	CC	secretory vesicle	761	-0.355297	-1.48128	0.00609756	0.150004	0.134616	1853	tags=26%, list=14%, signal=23%	DOK3/VPS33B/NDEL1/CADPS/GSN/APH1A/LAIR1/ORMDL3/PTGES2/COMMD9/PA2G4/PGAM1/NFAM1/AP2A2/SLC2A8/SIRPB1/SERPING1/SMPD1/ANXA11/EEF2/DNAJC13/VCL/ANXA2/LTF/TOM1/SYTL1/CYBA/ICA1/PCSK1N/FCER1G/ARSA/FTL/NEU1/TOLLIP/PSMD1/CSTB/SURF4/CLK3/ARHGAP9/RHOA/HSP90AB1/CD300A/STX4/APEH/TYROBP/NME2/F5/RHOF/GM2A/RAB35/FOLR3/DNAJC5/PECAM1/TMBIM1/PDXK/APRT/IMPDH2/PADI2/FCGR2A/BRI3/CD63/RAB40C/TCIRG1/RAB3IL1/CLN3/ALOX5/DPE…
GO:0005768	CC	endosome	731	-0.295646	-1.22942	0.00606061	0.150004	0.134616	2091	tags=25%, list=16%, signal=22%	TPCN2/GGA2/AVPR2/PICK1/HLA-DRB4/RAB5C/TCN2/TBC1D14/CHMP2A/SLC15A4/VPS26B/SDF4/GNPNAT1/TGFBRAP1/RCC2/HLA-F/TBC1D16/EHD4/MAP1LC3A/PTPN23/SLC31A1/JAK1/VPS33B/VPS4A/MYD88/FYN/PRAF2/APH1A/ATP13A2/UNC93B1/ABCA7/IFITM3/IFNAR1/CD320/TUBA1A/EPHA8/RUSC1/AP2A2/WDR48/LZTR1/TMEM175/SNX8/LEPROT/ATP6V0B/IL2RB/SMPD1/ANTXR2/DNAJC13/ANXA2/LTF/TOM1/CYBA/PLEKHB2/LRPAP1/TMEM127/AP1G1/RHOA/AP3D1/AP2B1/ARRB2/RAPGEF1/AP…
GO:0051130	BP	positive regulation of cellular component organization	726	-0.300989	-1.25046	0.00613497	0.15042	0.134989	1888	tags=20%, list=14%, signal=18%	RALB/PTPN23/STK11/NDEL1/MYD88/FYN/GSN/PRDM9/NUMA1/S100A10/CAMK1/ABCA7/CIDEB/TP53/DHX33/TIRAP/SMPD1/ADCK1/STUB1/ANXA2/MET/PTK2B/SURF4/ARRB1/NUP62/DBN1/RHOA/EVL/AP2B1/DUSP3/ARRB2/RAPGEF1/VASP/TESK1/TYROBP/ULK1/P2RX7/IL4R/PLEK2/EP300/NCAPD2/FHOD1/BAX/DCTN1/DDX56/BOK/HMBOX1/NMT1/HNRNPD/KATNB1/PFN1/RALBP1/CD63/SIN3A/LCP1/CDC42EP2/LDLRAP1/CLN3/CTTN/PPP1R15A/FIS1/CDK5RAP2/SRF/BIN1/PXN/FLNA/PPP1R10/EIF5A…
GO:0048646	BP	anatomical structure formation involved in morphogenesis	769	-0.323538	-1.35089	0.00628931	0.15369	0.137923	1969	tags=21%, list=15%, signal=19%	COL18A1/AKAP13/JUNB/DUSP2/PIK3CG/ITGAX/JAM3/PGM5/RDH13/RAMP2/AMOTL2/LUZP1/SMARCD3/CTSH/ZP3/EPHA1/PAFAH1B1/SH2D2A/ATP2B4/EOMES/FBXW7/CLASP1/FUZ/PLXND1/LFNG/NFIB/B4GALT1/CEACAM1/JUP/MFGE8/TBX18/IL1B/ENG/TBX19/CASP9/JAK1/FHL2/ITGB5/BRD2/AAMP/HERC1/CAMK1/PAK4/IL10/ERCC2/WDR74/MPL/TP53/RGMA/HMOX1/ACTG1/EXT1/SLC4A2/ANXA2/SKI/ADIPOR2/PTK2B/KLF2/RHOA/MTHFR/PDPK1/VASP/EMILIN2/TYROBP/IL4R/TGM2/EP300/HSPB1/…
GO:0072672	BP	neutrophil extravasation	11	-0.767292	-1.64884	0.00642398	0.153903	0.138115	2454	tags=64%, list=18%, signal=52%	PIK3CG/FUT7/CD99/PECAM1/CD99L2/ADAM8/PIK3CD
GO:0032958	BP	inositol phosphate biosynthetic process	15	-0.702775	-1.64482	0.00641026	0.153903	0.138115	1455	tags=47%, list=11%, signal=42%	HRH1/ITPKC/PTK2B/PLCG2/SNCA/ITPKB/PTAFR
GO:0070300	MF	phosphatidic acid binding	15	-0.699639	-1.63747	0.00641026	0.153903	0.138115	1759	tags=40%, list=13%, signal=35%	ATP13A2/PITPNC1/PACSIN2/PITPNM1/RAPGEF6/NRGN
GO:0034505	BP	tooth mineralization	15	-0.698583	-1.635	0.00641026	0.153903	0.138115	1546	tags=27%, list=12%, signal=24%	SLC4A2/STIM1/TCIRG1/ALPL
GO:0001775	BP	cell activation	803	-0.330903	-1.38707	0.00641026	0.153903	0.138115	2099	tags=25%, list=16%, signal=23%	IL27RA/LFNG/SOX13/CEACAM1/GAB2/VWF/LILRA5/HLA-DRB4/CD151/LILRB2/NCAPH2/SLC15A4/IL1B/MAD1L1/HLA-F/ZNF683/NFKBID/STK11/VSIG4/CMTM7/FUT7/MICB/CARD11/ZMIZ1/MYD88/FYN/CD6/GSN/MFHAS1/CRLF2/CD320/IL10/CD5/MPL/TP53/NFAM1/CD84/KDELR1/HMOX1/LAG3/SH3KBP1/SIRPB1/TIRAP/ACTG1/IL2RB/CD300LF/IRF1/VCL/FCER1G/RELB/PTK2B/TOLLIP/LILRA2/LTBR/AP1G1/CEBPA/RHOA/TSPAN32/ACTB/AP3D1/RPS6KA1/DUSP3/CDKN1A/CD300A/PDPK1/DHPS/S…
GO:1901698	BP	response to nitrogen compound	776	-0.289806	-1.20905	0.00636943	0.153903	0.138115	1888	tags=20%, list=14%, signal=18%	RALB/VIM/MAP1LC3A/GRM2/STK11/JAK1/FUT7/CRY2/NDEL1/MYD88/PPP1R9B/FYN/EIF2B4/STAT2/IL10/WDTC1/USF1/TP53/SLC2A8/MAN1B1/EDEM2/EIF4EBP2/SSH1/LEPROT/ANKZF1/EXT1/SMPD1/STUB1/LARP1/ATP1A3/CYBA/FCER1G/PTK2B/KLF2/UROS/CRKL/RHOA/GSTM2/FBXO6/ACTB/HSP90AB1/MTHFR/ARRB2/CRK/RAPGEF1/PDPK1/NCOR2/P2RX7/SLC26A6/TGM2/CES1/SLC27A1/NLRP1/TICAM1/TRIM41/APRT/HNRNPD/CCND3/SIN3A/PTPRE/RNF40/PTPN1/STAT5B/UBE4B/ADORA2A/SH2B…
GO:0006007	BP	glucose catabolic process	17	-0.67256	-1.62888	0.00652174	0.155736	0.13976	2025	tags=41%, list=15%, signal=35%	TKTL1/ENO2/TP53/PFKP/PFKL/HK3/ENO1
GO:0061620	BP	glycolytic process through glucose-6-phosphate	13	-0.732529	-1.61948	0.00665188	0.157815	0.141626	1708	tags=46%, list=13%, signal=40%	ENO2/GALK1/PFKP/PFKL/HK3/ENO1
GO:2000651	BP	positive regulation of sodium ion transmembrane transporter activity	13	-0.724746	-1.60228	0.00665188	0.157815	0.141626	186	tags=38%, list=1%, signal=38%	WNK1/SLC9A1/DNM2/TESC/ACTN4
GO:0019003	MF	GDP binding	62	0.57296	1.72069	0.0066778	0.157919	0.141719	1879	tags=39%, list=14%, signal=33%	RAB8B/RAP2A/RAB10/ARL8B/RAP1B/GNAI3/RAB5A/RAP2C/RHEB/RAB21/RALA/GBP1/RAN/RAB18/TRIM23/RAB9A/RAB22A/RRAS2/RAB4A/RHOB/NRAS/PRPS2/RAB27A/RIT1
GO:0004683	MF	calmodulin-dependent protein kinase activity	23	-0.637826	-1.65145	0.00677201	0.159632	0.143256	1747	tags=57%, list=13%, signal=49%	CAMK2G/CAMK1D/PHKA1/EEF2K/CAMKK2/CAMK1/MAPKAPK2/PTK2B/PHKG2/MAPKAPK3/CAMK1G/PHKA2/MKNK2
GO:0098590	CC	plasma membrane region	808	-0.32009	-1.33878	0.00680272	0.159842	0.143445	2216	tags=19%, list=17%, signal=17%	ATP2B4/CLSTN1/SLC14A1/IGSF9B/WDR73/SLC16A12/AGER/PTPRA/PLXND1/B4GALT1/CEACAM1/JUP/PICK1/PRKAR2A/ATP1A1/ATP6V1B2/ZFYVE19/PLVAP/GRM2/DAGLB/LRP3/PPP1R9B/EPS15L1/APH1A/ABCA7/ENO2/AP2A2/SLC13A3/ICAM2/SPATA13/HMOX1/LRFN3/TIRAP/SSH1/NECAP2/EPB41/SLC4A2/ANXA2/ATP1A3/SYTL1/MFSD10/CYBA/MET/ARRB1/RIMS4/CRKL/SLC5A6/DBN1/RHOA/SLC1A5/AQP10/AP2B1/HSP90AB1/ARRB2/VASP/AP2A1/STX4/ARHGEF18/PSTPIP1/SLC6A6/PLEK2/SLC2…
GO:0030139	CC	endocytic vesicle	271	-0.356182	-1.36462	0.00692042	0.162088	0.14546	2074	tags=29%, list=16%, signal=25%	MPO/AVPR2/PICK1/HLA-DRB4/RAB5C/VPS26B/HLA-F/EHD4/VIM/ITGB5/RAB43/GSN/UNC93B1/AP2A2/SLC2A8/SH3KBP1/RIN1/TIRAP/ACTG1/ATP6V0B/ANXA11/ZDHHC5/LTF/CYBA/TAP1/AP2B1/ARRB2/CD163/AP2A1/STX4/MARCO/RAB35/TGOLN2/AP2S1/HLA-E/TCIRG1/CDC42EP2/LDLRAP1/HLA-C/UBA52/GNLY/CD74/RAC2/HLA-B/RAPGEF6/CORO1A/CDC42EP4/CD4/RAB8A/LYN/FLOT2/ADAM8/RAB5B/HLA-A/HGS/CALR/VAMP2/FMNL1/ATP6V0A1/NCF4/RIN3/NCF1/LAMP1/TAPBP/EHD1/IGF2R/S…
GO:0042554	BP	superoxide anion generation	34	-0.592765	-1.67467	0.00699301	0.162171	0.145535	1654	tags=41%, list=12%, signal=36%	NOXO1/NCF1B/CYBA/TYROBP/GSTP1/ALOX12/ITGB2/ITGAM/AATF/NCF4/NCF1/SYK/GNAI2/NCF1C
GO:0022617	BP	extracellular matrix disassembly	36	-0.569613	-1.63141	0.00719424	0.162171	0.145535	2176	tags=31%, list=16%, signal=26%	CLASP1/PBXIP1/NOXO1/LCP1/FSCN1/CST3/ADAM8/DDR1/FURIN/FLOT1/MMP9
GO:0050432	BP	catecholamine secretion	36	-0.56928	-1.63046	0.00719424	0.162171	0.145535	4604	tags=58%, list=34%, signal=38%	SYT11/OPRK1/OXT/SYT10/SYT7/SYT9/DRD3/CNR1/SYT15/CHGA/GABBR1/OXTR/ADRA2A/SYT3/STX1A/ADRA2B/GRM2/ADORA2A/PINK1/LY6E/SNCA
GO:0045912	BP	negative regulation of carbohydrate metabolic process	36	-0.562195	-1.61016	0.00719424	0.162171	0.145535	1964	tags=31%, list=15%, signal=26%	GIT1/NCOR1/FAM3A/TP53/AP2A1/EP300/GSK3B/FBP1/STAT3/MIDN/SLC4A1
GO:0030838	BP	positive regulation of actin filament polymerization	35	-0.564992	-1.59798	0.00721154	0.162171	0.145535	1455	tags=37%, list=11%, signal=33%	PTK2B/RHOA/EVL/VASP/PFN1/CDC42EP2/CTTN/BIN1/HCK/CDC42EP4/GRB2/NCKAP1L/PYCARD
GO:0043254	BP	regulation of protein-containing complex assembly	295	-0.357581	-1.38342	0.00711744	0.162171	0.145535	2042	tags=27%, list=15%, signal=23%	SIRT2/EIF4G1/TRIOBP/GIT1/MYADM/RALB/RNF4/TMC8/MYD88/GSN/TBCD/NUMA1/TP53/EIF2AK2/DHX33/TIRAP/SSH1/STUB1/MET/PTK2B/SPTBN4/DBN1/RHOA/EVL/ESAM/VASP/ULK1/EP300/BAX/TICAM1/DCTN1/PFN1/LCP1/SPTBN1/SSH3/CDC42EP2/CTTN/CDK5RAP2/BIN1/HDAC6/PINK1/FSCN1/TWF2/HCFC1/PPP2R5B/HCLS1/PLCG2/CORO1A/HCK/ARPC1B/IKBKE/CDC42EP4/GSK3B/ARL2/TFIP11/DBNL/SNCA/GRB2/ADD1/COTL1/VCP/TMOD1/PAK1/NCKAP1L/PYCARD/SPTAN1/NAPA/ARPC4/NR1…
GO:0050727	BP	regulation of inflammatory response	262	-0.363185	-1.38219	0.00706714	0.162171	0.145535	1251	tags=20%, list=9%, signal=18%	IL18/NLRP1/HLA-E/AOAH/PLCG1/ZBP1/ALOX5/STAT5B/NLRX1/ADORA2A/ADA/RELA/ALOX5AP/NKG7/NFKB1/BAP1/GSTP1/PLCG2/NR1D1/HCK/RIPK1/SNCA/LYN/SHARPIN/NINJ1/ADAM8/FEM1A/SBNO2/TNFRSF1A/CST7/TNFRSF1B/IFI35/FURIN/GPSM3/PYCARD/NCF1/NLRP12/TNIP1/NFKBIA/SYK/KRT1/GBA/GPX1/GPS2/GRN/PGLYRP1/AKNA/IRF3/ZYX/IL17RA/HLA-DRB1/MMP9
GO:0031252	CC	cell leading edge	309	-0.351774	-1.36678	0.00699301	0.162171	0.145535	1964	tags=24%, list=15%, signal=21%	GIT1/ATP6V1B2/MYADM/NRBP1/VIM/NDEL1/PPP1R9B/GSN/ABCA7/SPATA13/TIRAP/SSH1/ABLIM1/PTK2B/DBN1/RHOA/EVL/ACTB/VASP/TESK1/STX4/PSTPIP1/NME2/PLEK2/RASGRP2/MTMR14/ABI3/ACTA2/LCP1/PACSIN2/PLCG1/SPTBN1/CTTN/GBF1/ADORA2A/P4HB/PXN/RAC2/HDAC6/FSCN1/TWF2/PLCG2/CORO1A/CTNNA1/PSD4/DBNL/FGD3/SLC9A3R1/FLOT2/S100A11/ARHGEF2/CFL1/MYO1G/DPP9/PAK1/INPPL1/AAK1/PIP5K1C/CAPZB/FAM89B/SLC9A1/ITGA5/SH3BP1/PDLIM7/FLOT1/MYH9/…
GO:0052548	BP	regulation of endopeptidase activity	290	-0.349521	-1.35348	0.00716846	0.162171	0.145535	1925	tags=24%, list=14%, signal=21%	NDUFA13/ATP2A3/CASP9/FYN/GSN/APH1A/SERPINA10/ATP13A2/CIDEB/SERPING1/PRDX5/ANXA2/LTF/PCSK1N/CSTB/RHOA/RPS6KA1/ARRB2/MBP/BAX/NLRP1/APH1B/BOK/DAP/PSME3/UBE2O/SIAH2/FIS1/ADORA2A/SPOCK2/ADRM1/PRELID1/HDAC1/BIN1/NCSTN/BBC3/MAP3K5/PSENEN/IFI6/HIP1/PPM1F/SNCA/LYN/LAPTM5/CST3/POR/BCAP31/GAPDH/P2RX1/LGALS9/CST7/VCP/FURIN/TNFSF14/PYCARD/PLAUR/NLRP12/RENBP/SYK/CYFIP2/MICAL1/GPX1/STAT3/GPI/CFLAR/PI3/TIMP1/CTS…
GO:0042060	BP	wound healing	315	-0.341027	-1.3277	0.00706714	0.162171	0.145535	2313	tags=24%, list=17%, signal=20%	PAFAH2/SRC/SH2B3/PAPSS2/LMAN1/VKORC1/CORO1B/CLASP1/ST3GAL4/ADRA2B/B4GALT1/CEACAM1/VWF/CD151/CHMP2A/SERPINA10/USF1/MPL/PABPC4/HMOX1/SERPING1/ACTG1/EXT1/SMPD1/VCL/FCER1G/ADIPOR2/RHOA/TSPAN32/ACTB/CRK/CDKN1A/EMILIN2/F5/HSPB1/GNA12/ACTA2/CHMP4B/FZD7/ALOX5/MYL9/ADORA2A/SRF/ANXA5/FLNA/MAP3K5/CNN2/PLCG2/GNAS/ALOX12/TREML1/VAV1/LYN/P2RX1/CSRP1/DDR1/CHMP1A/GATA1/FERMT3/FIBP/PAK1/PLAUR/SYK/KRT1/GPX1/ITGA5/…
GO:0030234	MF	enzyme regulator activity	850	-0.29663	-1.24773	0.00699301	0.162171	0.145535	2010	tags=22%, list=15%, signal=20%	TBC1D14/SGSM3/GPS1/MAP3K12/PRKAR2A/GIT1/RCC2/ARHGDIG/TBC1D16/ARFGAP1/ATP2A3/CASP9/STK11/CALM1/MADD/TCL1B/PPP1R9B/FYN/ARHGAP26/APH1A/TBCD/SERPINA10/TBC1D2/EIF2B4/HERC1/OAZ1/WDTC1/CCNY/TP53/RGS14/EIF2AK2/RING1/NOXO1/RGL2/SPATA13/RIN1/SERPING1/MYO9A/PRDX5/TBC1D22B/ELP3/CCNF/ANXA2/SKI/LTF/NCF1B/PCSK1N/PSMD1/CSTB/ARHGAP9/ARRB1/PPP1R7/RPS6KA1/HSP90AB1/PPME1/RAPGEF1/CDKN1A/PDPK1/PITRM1/STX4/ARFGAP2/ARHG…
GO:0043005	CC	neuron projection	843	-0.282934	-1.18823	0.0070922	0.162171	0.145535	2612	tags=21%, list=20%, signal=18%	SPG7/CDK5/CRHR1/EPHB4/GHRL/HNRNPA3/PSEN2/DMWD/SLC6A12/NCDN/TIAM2/CHRNB3/SV2A/KCNAB2/P2RX4/SIPA1L1/FBXO7/DCTN2/GJC2/PRKCZ/GIPC1/SRC/STX1A/EPHA1/DHRS3/ARF1/PAFAH1B1/ATP2B4/ROGDI/CLSTN1/IGSF9B/KPNA1/KIF1B/NFIB/MARK3/S100A4/PICK1/SIRT2/NECAB2/GLRX5/TRIOBP/MAP3K12/ATP1A1/GIT1/VIM/GRM2/ANKS1A/ROBO3/NDEL1/MADD/PPP1R9B/FYN/IGHMBP2/NUMA1/ATP13A2/KLC3/EPHA8/ENO2/MPL/RGS14/ADCY4/SH3KBP1/LRFN3/ACTG1/ZDHHC5/M…
GO:0051094	BP	positive regulation of developmental process	845	-0.278691	-1.16946	0.00704225	0.162171	0.145535	2389	tags=21%, list=18%, signal=18%	DOCK5/ZBTB7B/RAMP2/GJC2/PRKCZ/SMARCD3/TMEM79/CTSH/SRC/ZP3/DHX37/TFE3/EPHA1/HSPA1A/PAFAH1B1/CLSTN1/CORO1B/CLASP1/ADRA2B/LTA/AGER/SPEN/PLXND1/SOX13/CEACAM1/JUP/SIRT2/EIF4G1/LILRB2/FBXO31/TRIOBP/IL1B/ENG/MYADM/NFKBID/METRNL/STK11/JAK1/HMG20B/NDEL1/ZMIZ1/LRP3/B4GALT5/VHL/TCF4/NUMA1/S100A10/CAMK1/PAK4/IL10/PA2G4/MPL/RGS14/HMOX1/SLC4A2/HIF1AN/LTF/TRADD/PTK2B/SPTBN4/CRKL/CEBPA/DBN1/RHOA/AP3D1/RPS6KA1/HS…
GO:0030150	BP	protein import into mitochondrial matrix	13	0.775783	1.68655	0.00725953	0.162255	0.14561	1952	tags=46%, list=15%, signal=39%	TOMM7/TOMM20/GRPEL2/DNAJC15/DNAJC19/TIMM23
GO:0098554	CC	cytoplasmic side of endoplasmic reticulum membrane	13	0.750558	1.63171	0.00725953	0.162255	0.14561	1729	tags=62%, list=13%, signal=54%	RPL27/RPS29/DNAJA1/SPPL2A/RPS28/PKD2/EPM2AIP1/RPS26
GO:0071379	BP	cellular response to prostaglandin stimulus	18	0.74572	1.74613	0.00733945	0.163047	0.146321	1402	tags=33%, list=10%, signal=30%	PTGER4/GNG2/PTGER2/PRKAA1/AKR1C3/PTGDR
GO:0030133	CC	transport vesicle	283	-0.354816	-1.36344	0.00732601	0.163047	0.146321	2537	tags=30%, list=19%, signal=25%	CLTCL1/YIPF1/HLA-H/SREBF2/YIPF3/SV2A/SPG21/CLTA/HLA-DRB3/GIPC1/STX1A/RAB11FIP5/ROGDI/LMAN1/KIF1B/CEACAM1/PICK1/HLA-DRB4/HLA-F/FGFRL1/NDEL1/APH1A/ATP13A2/KDELR1/SLC2A8/COPZ1/SYTL1/ICA1/SURF4/AP1G1/AP2A1/STX4/RAB35/DNAJC5/TGOLN2/STX5/APH1B/HLA-E/RAB40C/RAB3IL1/CLN3/PEF1/HLA-C/BIN1/NCSTN/CD74/RAB1B/AP1G2/SLC30A3/HLA-B/RABAC1/DISC1/BRSK1/HCK/IQSEC1/CALM3/TPRG1L/RAB8A/SNCA/SIPA1/LAPTM5/SYTL3/SEC24C/AR…
GO:0016668	MF	oxidoreductase activity, acting on a sulfur group of donors, NAD(P) as acceptor	11	0.821434	1.71188	0.00747664	0.164208	0.147362	939	tags=45%, list=7%, signal=42%	TXNDC17/GLRX/TXN/PRDX3/DLD
GO:1904667	BP	negative regulation of ubiquitin protein ligase activity	11	0.818211	1.70517	0.00747664	0.164208	0.147362	339	tags=36%, list=3%, signal=35%	RPL23/RPL5/RPL11/RPS20
GO:0030864	CC	cortical actin cytoskeleton	59	-0.520159	-1.63913	0.0074813	0.164208	0.147362	1909	tags=37%, list=14%, signal=32%	MYADM/PPP1R9B/GSN/PVALB/SPTBN4/DBN1/SPTBN1/CTTN/LLGL1/CLDN5/HCLS1/CORO1A/DBNL/FLOT2/LASP1/WDR1/COTL1/SPTAN1/FLOT1/MYH9/ACTN4/ACTN1
GO:0016567	BP	protein ubiquitination	618	0.333769	1.25919	0.00743494	0.164208	0.147362	2288	tags=24%, list=17%, signal=21%	RPL23/PCNP/RBX1/RPL5/RPS27A/SUZ12/CRBN/PJA2/BMI1/UBE2E1/CUL5/RPL11/DNAJA1/UBE2Q2/UBE2N/VCPIP1/PSMD10/PTPN22/KLHL9/BUB3/SIRT1/OGT/KLHDC2/TRIM22/RPS20/FBXO33/WSB1/UBA6/FBXL3/FEM1C/DCUN1D5/KLHL2/ATG3/PELI1/ANAPC13/NFE2L2/RNF14/UBE4A/HERC4/MEX3C/CAMLG/UBE2V2/KBTBD7/NDFIP1/BIRC3/DERL1/KLHL24/TRIP12/UBQLN1/NMI/KBTBD8/ANAPC4/PRMT3/ANAPC10/RNF138/SPOPL/DCUN1D4/MKRN2/UBE2J1/HECTD1/RNF145/MED30/FBXO30/RNF1…
GO:2000026	BP	regulation of multicellular organismal development	872	-0.281259	-1.1843	0.00757576	0.165785	0.148778	2387	tags=20%, list=18%, signal=18%	ZBTB7B/FBXO7/RAMP2/GJC2/PRKCZ/SMARCD3/TOB2/CTSH/TFE3/EPHA1/RASSF2/HSPA1A/PAFAH1B1/ATP2B4/CLSTN1/FBXW7/CLASP1/IKZF3/LTA/AGER/JARID2/SPEN/PLXND1/SOX13/CEACAM1/JUP/SIRT2/FGF23/LILRB2/FBXO31/TBX18/IL1B/ENG/ZNF683/NFKBID/STK11/JAK1/NDEL1/CARD11/ZMIZ1/B4GALT5/ASCL2/NUMA1/GORASP1/PAK4/IL10/MPL/TP53/NFAM1/RGS14/HMOX1/LAG3/CTDSP1/IRF1/SLC4A2/VCL/SKI/LTF/TRADD/PTK2B/KLF2/SEMA4B/CTDP1/DBN1/RHOA/AP3D1/PDPK1/…
GO:0007229	BP	integrin-mediated signaling pathway	84	-0.488711	-1.64369	0.00769231	0.166349	0.149284	1455	tags=26%, list=11%, signal=23%	PTK2B/TSPAN32/NME2/CD63/LAT/FLNA/HCK/CTNNA1/VAV1/ITGB2/ITGB7/FERMT3/ITGAM/ITGAL/ITGA2B/SYK/ITGA5/PRAM1/MYH9/TIMP1/ZYX/TLN1
GO:0009135	BP	purine nucleoside diphosphate metabolic process	84	-0.488233	-1.64208	0.00769231	0.166349	0.149284	1964	tags=33%, list=15%, signal=29%	GIT1/ENO3/TPI1/NCOR1/CARD11/PGAM1/ENO2/PGAM4/GALK1/P2RX7/EP300/PFKP/ZBTB20/ZBTB7A/PGM1/ARL2/PFKL/OGDH/GAPDH/HK3/ALDOC/FBP1/GUK1/ENO1/STAT3/GPI/MPP1/SLC4A1
GO:0009179	BP	purine ribonucleoside diphosphate metabolic process	84	-0.488233	-1.64208	0.00769231	0.166349	0.149284	1964	tags=33%, list=15%, signal=29%	GIT1/ENO3/TPI1/NCOR1/CARD11/PGAM1/ENO2/PGAM4/GALK1/P2RX7/EP300/PFKP/ZBTB20/ZBTB7A/PGM1/ARL2/PFKL/OGDH/GAPDH/HK3/ALDOC/FBP1/GUK1/ENO1/STAT3/GPI/MPP1/SLC4A1
GO:0012506	CC	vesicle membrane	888	-0.309639	-1.3056	0.00763359	0.166349	0.149284	2091	tags=26%, list=16%, signal=23%	TPCN2/B4GALT1/GGA2/CEACAM1/AVPR2/FCGR3B/PICK1/SNX22/HLA-DRB4/RAB5C/LILRB2/CHMP2A/SLC15A4/MFGE8/GNPNAT1/RCC2/HLA-F/MAGT1/EHD4/DOK3/VPS33B/RAB43/VPS4A/MYD88/CADPS/GDE1/PRAF2/APH1A/LAIR1/ATP13A2/AP1B1/ORMDL3/ABCA7/IFITM3/CD320/EPHA8/NFAM1/AP2A2/KDELR1/SLC2A8/COPZ1/LZTR1/TMEM175/SH3KBP1/SIRPB1/SNX8/LEPROT/ATP6V0B/NECAP2/ANTXR2/DNAJC13/ANXA2/TOM1/MFSD10/CYBA/ICA1/FCER1G/PLEKHB2/SURF4/ARRB1/TAP1/SLC5A6…
GO:0002832	BP	negative regulation of response to biotic stimulus	93	-0.47137	-1.61185	0.0078329	0.168396	0.151121	2073	tags=37%, list=16%, signal=31%	CEACAM1/SIRT2/GPATCH3/HLA-F/VSIG4/RNF26/MICB/FAM3A/STAT2/OAS1/SIGIRR/SERPING1/LTF/LILRA2/ARRB2/CRK/PARP14/HLA-E/TTLL12/NLRX1/TRAFD1/HLA-B/AHR/TRIM38/PCBP2/NPLOC4/LGALS9/HLA-A/TRIM21/ADAR/KIR2DL4/NR1H2/GRN/SEC14L1
GO:0030659	CC	cytoplasmic vesicle membrane	875	-0.31119	-1.3082	0.0078125	0.168396	0.151121	2091	tags=25%, list=16%, signal=23%	TPCN2/B4GALT1/GGA2/CEACAM1/AVPR2/FCGR3B/PICK1/SNX22/HLA-DRB4/RAB5C/LILRB2/CHMP2A/SLC15A4/MFGE8/GNPNAT1/RCC2/HLA-F/MAGT1/EHD4/DOK3/VPS33B/RAB43/VPS4A/MYD88/CADPS/GDE1/PRAF2/APH1A/LAIR1/ATP13A2/AP1B1/ORMDL3/ABCA7/IFITM3/CD320/EPHA8/NFAM1/AP2A2/KDELR1/SLC2A8/COPZ1/LZTR1/TMEM175/SH3KBP1/SIRPB1/SNX8/LEPROT/ATP6V0B/NECAP2/ANTXR2/DNAJC13/ANXA2/TOM1/MFSD10/CYBA/ICA1/FCER1G/PLEKHB2/SURF4/ARRB1/TAP1/AP1G1/…
GO:0042325	BP	regulation of phosphorylation	885	-0.277	-1.16563	0.00787402	0.168785	0.15147	2049	tags=19%, list=15%, signal=18%	LILRA5/SIRT2/FGF23/EIF4G1/MAP3K12/PRKAR2A/GIT1/DHX34/IL1B/ENG/MYADM/EHD4/RALB/NCOR1/STK11/CALM1/MADD/TCL1B/PPP1R9B/FYN/CD6/STK38/CAMK1/STAT2/EPHA8/PGAM1/CCNY/TP53/RGS14/TIRAP/CTDSP1/SMPD1/MAP2K3/CCNF/LTF/MET/PTK2B/SPTBN4/ARRB1/CRKL/NUP62/CEBPA/RHOA/ACTB/HSP90AB1/DUSP3/CDK9/ARRB2/UNC119/CDKN1A/CD300A/PDPK1/TESK1/IRAK1/CTDSP2/IKBKB/P2RX7/MARCO/EP300/HSPB1/IL18/SLC27A1/BAX/CSNK1D/PECAM1/BDKRB1/PARP1…
GO:0030833	BP	regulation of actin filament polymerization	100	-0.460832	-1.58511	0.00791557	0.169181	0.151825	1455	tags=33%, list=11%, signal=30%	SSH1/PTK2B/SPTBN4/DBN1/RHOA/EVL/ESAM/VASP/PFN1/SPTBN1/SSH3/CDC42EP2/CTTN/BIN1/TWF2/HCLS1/CORO1A/HCK/ARPC1B/CDC42EP4/DBNL/GRB2/ADD1/COTL1/TMOD1/NCKAP1L/PYCARD/SPTAN1/ARPC4/FLII/CAPZB/CYFIP2/SSH2
GO:0007010	BP	cytoskeleton organization	959	-0.322826	-1.37155	0.00806452	0.171365	0.153786	2446	tags=24%, list=18%, signal=21%	CDC14C/ZRANB1/JAM3/FGD2/ELMO2/PARVB/SIPA1L1/PGM5/GOLGA8A/KRT23/DCTN2/AMOTL2/PRKCZ/SAC3D1/SRC/EPHA1/ARF1/ALMS1/HSPA1A/PAFAH1B1/ARPC1A/PCNT/ARFIP2/TPM4/CORO1B/KIFC2/NUBP1/CLASP1/TUBB2A/INF2/WDR73/GAS7/ARHGDIB/CCDC69/E2F4/MARK3/PICK1/SMC1A/TRIOBP/CHMP2A/TTLL3/GIT1/LRCH3/MYADM/VIM/RNF4/NCOR1/NUAK2/NDEL1/ITGB5/VPS4A/PPP1R9B/TUBGCP6/GSN/ARHGAP26/MICAL2/TBCD/NUMA1/S100A10/PAK4/TTLL4/TUBA1A/MID1IP1/DNAH1…
GO:0007264	BP	small GTPase mediated signal transduction	379	-0.329074	-1.30274	0.00806452	0.171365	0.153786	1931	tags=24%, list=14%, signal=21%	ARHGDIG/DOK2/ARFGAP1/RALB/DOK3/MADD/ARHGAP26/RHOT2/TP53/NKIRAS2/RGL2/LZTR1/SPATA13/HMOX1/MYO9A/MET/ARHGAP9/ARRB1/CRKL/NUP62/STK19/RHOA/CRK/RAPGEF1/CDKN1A/ARHGEF18/RHOF/TGM2/RAB35/DEF6/NISCH/RASGRP2/GNA12/RALBP1/RRAS/RGL4/LAT/CDC42EP2/GBF1/SIAH2/RAB4B/RALGDS/RAC2/TNK2/RFXANK/RAPGEF6/GDI1/KCTD13/ARHGAP4/P2RY8/CDC42EP4/TSC2/IQSEC1/NOTCH1/PSD4/DBNL/VAV1/FGD3/ARHGEF1/SIPA1/TAX1BP3/CBL/PLEKHG3/DENND3/S…
GO:0030168	BP	platelet activation	103	-0.439759	-1.51418	0.00810811	0.171793	0.15417	2454	tags=32%, list=18%, signal=26%	PIK3CG/GP6/SRC/SH2B3/ADRA2B/CEACAM1/VWF/MPL/ACTG1/VCL/FCER1G/TSPAN32/ACTB/EMILIN2/HSPB1/MYL9/SRF/FLNA/PLCG2/GNAS/ALOX12/TREML1/VAV1/LYN/P2RX1/CSRP1/GATA1/FERMT3/FIBP/SYK/MYH9/GP9/TLN1
GO:0044877	MF	protein-containing complex binding	946	-0.320976	-1.35991	0.00819672	0.173171	0.155406	2061	tags=24%, list=15%, signal=21%	JUP/HADHA/VWF/GEMIN4/FCGR3B/PICK1/SMC1A/HLA-DRB4/CD151/XPC/CORO2A/LILRB2/BOP1/TRIOBP/MFGE8/GIT1/DHX34/IL1B/ENG/VIM/RNF4/STK11/PRMT2/TFPT/VPS33B/TAPBPL/NDEL1/ITGB5/VPS4A/PPP1R9B/IGHMBP2/GSN/SAMD1/NUMA1/ENO2/ZC3H18/USF1/TP53/ICAM2/LGALS12/DHX33/ANXA11/EPB41/EEF2/EIF4H/LARP1/CCNF/EIF4A3/RUVBL2/ABLIM1/TRADD/PVALB/FCER1G/PTK2B/LILRA2/SPTBN4/CTDP1/DBN1/DDB1/NOMO2/ACTB/AP2B1/HSP90AB1/MTHFR/ARRB2/CDKN1A/…
GO:0044772	BP	mitotic cell cycle phase transition	321	0.386897	1.39142	0.00825309	0.17386	0.156025	2286	tags=26%, list=17%, signal=22%	RPL26/ANXA1/RPL24/CUL5/RPS6/RAB11A/TMEM14B/RPS6KB1/ZFP36L1/CALM2/BUB3/RPS27L/VPS4B/E2F3/CCNG1/FBXL3/NAE1/RIOK2/PLRG1/CCNG2/ANAPC4/PPP2CA/CRLF3/MYC/SPAST/KHDRBS1/RNASEH2B/SLFN11/CDKN1B/RRM2B/ACVR1/TRIAP1/CKS2/CCNH/AIF1/CLASP2/NSMCE2/PKD2/SYF2/PTEN/ID2/RB1/CKS1B/PCID2/RPA2/PPM1D/FBXO5/WAC/TAF2/HECW2/RDX/PKIA/BID/CUL2/BCAT1/CDC26/USP47/ITGB1/RAD21/TOPBP1/CUL4B/BRCC3/SKP2/CDK6/CDC23/MAD2L1BP/BCL2/CDC…
GO:0005975	BP	carbohydrate metabolic process	438	-0.31647	-1.27452	0.00833333	0.175048	0.15709	2421	tags=36%, list=18%, signal=30%	ALDOB/HYAL4/HRH1/DHTKD1/ST3GAL5/CHST14/ST3GAL3/SLC5A3/CHST13/TFF3/AMDHD2/MANBA/PCK2/UXS1/IDUA/POMT1/KLB/INPP5A/B3GAT3/PPARD/ALDOA/DGAT2/DDIT4/B3GNT8/CRTC2/ENTPD5/CHST2/GLB1/CHST7/GHRL/CHST3/PASK/ACACB/HYAL3/STK40/GALM/SIRT7/PGM5/PMM2/SRC/AKR1A1/NDST2/GALNT3/SLC2A6/AKR7A2/NPL/SLC37A4/SHPK/TPD52L2/LCMT1/MPDU1/ST3GAL4/TALDO1/GLYCTK/B4GALT1/TKTL1/CHST12/GIT1/ENO3/GALT/GAL3ST4/TPI1/MAN2A2/NCOR1/STK11/…
GO:0042887	MF	amide transmembrane transporter activity	28	-0.633454	-1.73632	0.00886918	0.175778	0.157746	3137	tags=61%, list=23%, signal=47%	TAP2/ABCB9/SLC46A1/SLC38A7/SLC19A2/SLC14A1/SLC15A4/SLC13A3/TAP1/SLC5A6/AQP10/SLC27A1/ABCD1/SLC19A1/TAPBP/SLC38A5/SLC15A3
GO:1901798	BP	positive regulation of signal transduction by p53 class mediator	23	0.701576	1.7233	0.00894454	0.175778	0.157746	1718	tags=43%, list=13%, signal=38%	RPL26/RPL23/RPS20/EEF1E1/SPRED1/MYC/PYHIN1/DDX5/PMAIP1/RPS7
GO:0043516	BP	regulation of DNA damage response, signal transduction by p53 class mediator	27	0.678041	1.72269	0.00904159	0.175778	0.157746	1522	tags=37%, list=11%, signal=33%	RPL26/ZMPSTE24/PSMD10/SIRT1/EEF1E1/SPRED1/PYHIN1/DDX5/PMAIP1/DYRK1A
GO:0030224	BP	monocyte differentiation	27	-0.631601	-1.71308	0.00890869	0.175778	0.157746	876	tags=33%, list=7%, signal=31%	CD74/ACIN1/CD4/THOC5/FASN/CSF1R/FES/MYH9/HLA-DRB1
GO:1902742	BP	apoptotic process involved in development	29	-0.622798	-1.70452	0.00904977	0.175778	0.157746	1237	tags=31%, list=9%, signal=28%	XKR8/HAND2/BAK1/BAX/NOTCH1/TNFRSF1A/TNFRSF1B/SPI1/MEGF10
GO:0030574	BP	collagen catabolic process	27	-0.619626	-1.68061	0.00890869	0.175778	0.157746	580	tags=15%, list=4%, signal=14%	CST3/FURIN/CTSB/MMP9
GO:0048384	BP	retinoic acid receptor signaling pathway	27	-0.617623	-1.67517	0.00890869	0.175778	0.157746	2285	tags=37%, list=17%, signal=31%	DHRS3/ASXL1/KLF2/CRKL/RXRB/CALR/NR1H2/RXRA/RARA/ACTN4
GO:0045742	BP	positive regulation of epidermal growth factor receptor signaling pathway	26	-0.618472	-1.66866	0.00883002	0.175778	0.157746	634	tags=42%, list=5%, signal=40%	ADAM17/PTK6/ADRA2A/FBXW7/NUP62/HIP1/CBL/NCF1/PLAUR/MMP9/SHKBP1
GO:0042605	MF	peptide antigen binding	24	-0.628599	-1.65528	0.00884956	0.175778	0.157746	1425	tags=50%, list=11%, signal=45%	HLA-H/HLA-DRB3/HLA-F/TAP1/HLA-E/HLA-C/SLC7A5/HLA-B/HLA-A/TAPBP/HLA-DRB1/HLA-DRB5
GO:0019239	MF	deaminase activity	22	-0.637586	-1.62703	0.00902935	0.175778	0.157746	1295	tags=32%, list=10%, signal=29%	GNPDA1/ZBP1/ADA/ADAT1/APOBEC3C/ADAR/CDA
GO:0002679	BP	respiratory burst involved in defense response	11	-0.750434	-1.61261	0.00856531	0.175778	0.157746	726	tags=55%, list=5%, signal=52%	PIK3CG/MPO/HCK/NCF1/GRN/PIK3CD
GO:1901741	BP	positive regulation of myoblast fusion	11	-0.747917	-1.6072	0.00856531	0.175778	0.157746	1285	tags=36%, list=10%, signal=33%	IL4R/TNFSF14/EHD1/FLOT1
GO:1902170	BP	cellular response to reactive nitrogen species	14	-0.692406	-1.58103	0.00854701	0.175778	0.157746	1352	tags=43%, list=10%, signal=39%	CRK/HNRNPD/MAP3K5/STAT6/CFLAR/DNM2
GO:0001848	MF	complement binding	14	-0.688773	-1.57274	0.00854701	0.175778	0.157746	493	tags=36%, list=4%, signal=34%	VSIG4/CALR/ITGB2/ITGAM/MEGF10
GO:0030427	CC	site of polarized growth	124	-0.436335	-1.52433	0.00864553	0.175778	0.157746	2042	tags=27%, list=15%, signal=23%	SIRT2/MAP3K12/NDEL1/PPP1R9B/IGHMBP2/ENO2/MYO9A/PTK2B/DBN1/HSP90AB1/FKBP15/KATNB1/CTTN/FXR2/FLNA/TAOK2/NEO1/PINK1/FSCN1/DISC1/TWF2/HCLS1/ARHGAP4/CALM3/GDPD5/DBNL/SNCA/CBL/COPA/EXOC3/TRPV2/BASP1/DSCAM/DNM2
GO:0000082	BP	G1/S transition of mitotic cell cycle	162	0.437169	1.47156	0.00892857	0.175778	0.157746	1869	tags=23%, list=14%, signal=20%	RPL26/ANXA1/CUL5/RPS6/TMEM14B/RPS6KB1/RPS27L/E2F3/PLRG1/PPP2CA/CRLF3/MYC/KHDRBS1/SLFN11/CDKN1B/ACVR1/TRIAP1/CCNH/AIF1/PKD2/PTEN/ID2/RB1/RPA2/WAC/RDX/BID/CUL2/BCAT1/ITGB1/CUL4B/SKP2/CDK6/BCL2/CDC7/RBL2/KLF4
GO:0031396	BP	regulation of protein ubiquitination	176	0.429733	1.46441	0.00874636	0.175778	0.157746	2226	tags=29%, list=17%, signal=24%	RPL23/RBX1/RPL5/BMI1/RPL11/DNAJA1/UBE2N/PSMD10/PTPN22/BUB3/OGT/RPS20/FBXO33/DCUN1D5/PELI1/CAMLG/UBE2V2/NDFIP1/BIRC3/DERL1/TRIP12/UBQLN1/NMI/PRMT3/SPOPL/DCUN1D4/PARK7/PDCD6/GTPBP4/BIRC2/PTEN/ATG5/FBXO5/TOPORS/MAPK9/RNF20/RIPK2/IVNS1ABP/SKP2/RPS7/ARRDC3/PPIA/UBR5/FBXO4/LRRK2/GLMN/CTR9/NOD2/TNFAIP3/DDX3X/MASTL
GO:0016477	BP	cell migration	990	-0.341193	-1.44675	0.00892857	0.175778	0.157746	2454	tags=23%, list=18%, signal=20%	PIK3CG/ITGAX/ANXA6/ZRANB1/JAM3/P2RX4/ELMO2/DOCK5/AMOTL2/MOSPD2/PRKCZ/GIPC1/CTSH/SRC/ZP3/EPHA1/PAFAH1B1/HACE1/LRRC15/SDC3/ATP2B4/CORO1B/FBXW7/CLASP1/ST3GAL4/TUBB2A/CCL23/ZNF580/FUZ/PBXIP1/AGER/ARHGDIB/PLXND1/IL27RA/B4GALT1/CEACAM1/JUP/CD151/FGF23/FBXO31/TRIP6/IL1B/ENG/RCC2/TREM1/PLVAP/MYADM/ARTN/PTPN23/FUT7/ANKS1A/NDEL1/ITGB5/ZMIZ1/MYD88/PPP1R9B/FYN/PIK3C2B/AAMP/CD99/PAK4/IL10/EPHA8/LGALS12/MEGF9/…
GO:0015980	BP	energy derivation by oxidation of organic compounds	204	0.421727	1.44671	0.00874636	0.175778	0.157746	1983	tags=26%, list=15%, signal=23%	COX7C/NDUFA4/UQCRQ/NDUFB3/COX7A2/RB1CC1/PPP1CC/NDUFB2/NDUFS4/NDUFA1/NDUFS5/PPP1R2/PTGES3/MDH1/NDUFAB1/SDHD/NDUFB5/PPP1CB/ACADM/COQ10B/CHCHD2/UQCRC2/DNAJC15/MYC/HIF1A/SUCLG2/PARK7/DLD/GHITM/ETFA/BNIP3/IFNG/SLC25A13/CISD1/ATP7A/BID/SUCLA2/UQCRB/DLAT/BLOC1S1/CAT/MTFR1/EPM2AIP1/UQCRH/GYG1/SUCLG1/NDUFV2/PDE12/COX6A1/IDH1/GFPT1/UQCRFS1/PPP1R3D/IRS2
GO:0043393	BP	regulation of protein binding	161	-0.38866	-1.42762	0.00906344	0.175778	0.157746	2519	tags=32%, list=19%, signal=26%	SYMPK/DHRS7B/LDOC1/CBLB/SMARCD3/SRC/DNAJB2/CCL23/PLXND1/LFNG/MARK3/ATP2A3/RALB/TMC8/CAMK1/IL10/RGMA/EPB41/STUB1/ANXA2/LRPAP1/ACTB/HSP90AB1/ARRB2/CRK/CDKN1A/EP300/BAX/TICAM1/GOLGA2/LDLRAP1/CFHR2/CTSZ/CLDN5/HIPK2/DISC1/DAB2/GTF2F1/ZFPM1/GSK3B/TFIP11/MARK2/ADD1/TRIM21/FKBP1A/PPP1CA/MAPK3/FLOT1/GNL3L/MMP9/SORL1
GO:0031334	BP	positive regulation of protein-containing complex assembly	147	-0.394972	-1.41896	0.00903614	0.175778	0.157746	1821	tags=27%, list=14%, signal=23%	MYD88/NUMA1/TP53/DHX33/TIRAP/STUB1/MET/PTK2B/RHOA/EVL/VASP/BAX/DCTN1/PFN1/LCP1/CDC42EP2/CTTN/CDK5RAP2/BIN1/PINK1/FSCN1/PPP2R5B/PLCG2/HCK/CDC42EP4/GSK3B/ARL2/SNCA/GRB2/VCP/PAK1/NCKAP1L/PYCARD/NR1H2/SYK/FES/MSN/MED25/GNL3L
GO:0005102	MF	signaling receptor binding	952	-0.31895	-1.34952	0.00869565	0.175778	0.157746	2071	tags=20%, list=15%, signal=18%	S100A4/GAB2/VWF/PICK1/NECAB2/CD151/FGF23/LILRB2/TRIP6/MFGE8/IL1B/ENG/TGFBRAP1/VSTM1/HLA-F/DOK2/ASXL1/ARTN/USP4/METRNL/PRMT2/JAK1/CMTM7/ANKS1A/MICB/ITGB5/MADD/MYD88/PPP1R9B/FYN/CRLF2/UNC93B1/CD320/IL10/TP53/TRAP1/ICAM2/LGALS12/RGMA/LAG3/TIRAP/LEPROT/CD300LF/STUB1/HIF1AN/CXCL14/APBB3/SYTL1/TRADD/PCSK1N/PTK2B/LRPAP1/TOLLIP/SEMA4B/AIP/ARRB1/CRKL/TAP1/GSTM2/HSP90AB1/DUSP3/ARRB2/CRK/AP2A1/NCOR2/FIBCD1/…
GO:0050865	BP	regulation of cell activation	474	-0.314278	-1.27423	0.00858369	0.175778	0.157746	2574	tags=29%, list=19%, signal=25%	MAD2L2/CD22/CD27/TNFRSF14/RIPK3/PLA2G2D/CEBPB/CBLB/NLRP3/IGLL1/LAX1/GP6/CD33/ZBTB7B/FBXO7/HLA-DRB3/PRKCZ/SRC/ZP3/SH2B3/SHPK/IKZF3/AGER/IL27RA/SOX13/CEACAM1/GAB2/LILRA5/HLA-DRB4/LILRB2/SLC15A4/IL1B/MAD1L1/HLA-F/ZNF683/NFKBID/VSIG4/CARD11/ZMIZ1/MYD88/FYN/CD6/MFHAS1/CRLF2/CD320/IL10/CD5/MPL/NFAM1/CD84/HMOX1/LAG3/SH3KBP1/SIRPB1/TIRAP/CD300LF/IRF1/FCER1G/LILRA2/AP1G1/CEBPA/RHOA/TSPAN32/AP3D1/RPS6KA1/D…
GO:0000904	BP	cell morphogenesis involved in differentiation	499	-0.309099	-1.25645	0.00900901	0.175778	0.157746	1934	tags=19%, list=14%, signal=17%	RCC2/MYADM/ARTN/CASP9/STK11/ROBO3/NDEL1/FYN/B4GALT5/TBCD/S100A10/GORASP1/EPHA8/MPL/MEGF9/EXT1/VCL/MET/SPTBN4/SEMA4B/CRKL/NCAM1/DBN1/RHOA/ACTB/HSP90AB1/CRK/VASP/TESK1/KEL/ULK1/EP300/MBP/EPHB6/PLOD3/ABI3/SIN3A/KIF13B/LYPLA2/FZD7/CTTN/RNF165/TBC1D20/SRF/LLGL1/P4HB/PXN/FLNA/TAOK2/NEO1/SLITRK1/RAC2/HDAC6/DISC1/TWF2/DAB2/GDI1/BRSK1/BSG/ARHGAP4/ZFPM1/NOTCH1/NBEAL2/GSK3B/DBNL/RAB8A/SLC9A3R1/CALR/MARK2/WD…
GO:0002521	BP	leukocyte differentiation	446	-0.311948	-1.25573	0.00840336	0.175778	0.157746	2532	tags=28%, list=19%, signal=23%	PREX1/GON4L/DHRS7B/RIPK3/PLA2G2D/CEBPB/JUNB/BAK1/NLRP3/CEBPE/ZBTB7B/FBXO7/PRKCZ/TOB2/SRC/KLF6/TFE3/RASSF2/PAFAH1B1/EOMES/FBXW7/IKZF3/AGER/LFNG/SOX13/CEACAM1/GAB2/LILRB2/NCAPH2/IL1B/ZNF683/NFKBID/STK11/CMTM7/FUT7/CARD11/ZMIZ1/IL10/TP53/NFAM1/KDELR1/LAG3/IRF1/ANXA2/LTF/FCER1G/RELB/PTK2B/LTBR/GAB3/CEBPA/RHOA/AP3D1/TYROBP/IL4R/EP300/IL18/BAX/PKNOX1/SOX12/TMEM176B/RRAS/YY1/TCIRG1/FZD7/ZBTB7A/STAT5B/IL…
GO:0043207	BP	response to external biotic stimulus	990	-0.2957	-1.25385	0.00892857	0.175778	0.157746	1885	tags=23%, list=14%, signal=21%	CASP9/VIM/ZNF683/VSIG4/JAK1/RNF26/MICB/RAB43/MYD88/FYN/CD6/GSN/MFHAS1/NUB1/CCDC92/UNC93B1/FAM3A/IFITM3/IFNAR1/STAT2/IL10/OAS1/SIGIRR/IL10RA/NFKBIB/TP53/CD84/MAPKAPK2/EIF2AK2/RNASE6/LAG3/TIRAP/SERPING1/ACTG1/EXT1/SMPD1/MAP2K3/IRF1/ISG20/CXCL14/TRIM44/LTF/CYBA/RBM14/IRF9/MX1/FCER1G/RELB/PTK2B/TOLLIP/LILRA2/PABPN1/AP1G1/RHOA/TSPAN32/HSP90AB1/ARRB2/CRK/TRIM8/STX4/POLR3A/POU2F2/PSTPIP1/EMILIN2/IRAK1/T…
GO:0051707	BP	response to other organism	988	-0.293401	-1.24405	0.00900901	0.175778	0.157746	1885	tags=23%, list=14%, signal=21%	CASP9/VIM/ZNF683/VSIG4/JAK1/RNF26/MICB/RAB43/MYD88/FYN/CD6/GSN/MFHAS1/NUB1/CCDC92/UNC93B1/FAM3A/IFITM3/IFNAR1/STAT2/IL10/OAS1/SIGIRR/IL10RA/NFKBIB/TP53/CD84/MAPKAPK2/EIF2AK2/RNASE6/LAG3/TIRAP/SERPING1/ACTG1/EXT1/SMPD1/MAP2K3/IRF1/ISG20/CXCL14/TRIM44/LTF/CYBA/RBM14/IRF9/MX1/FCER1G/RELB/PTK2B/TOLLIP/LILRA2/PABPN1/AP1G1/RHOA/TSPAN32/HSP90AB1/ARRB2/CRK/TRIM8/STX4/POLR3A/POU2F2/PSTPIP1/EMILIN2/IRAK1/T…
GO:0019220	BP	regulation of phosphate metabolic process	977	-0.282222	-1.19786	0.00854701	0.175778	0.157746	2049	tags=20%, list=15%, signal=18%	LILRA5/SIRT2/FGF23/EIF4G1/LILRB2/MAP3K12/PRKAR2A/GIT1/DHX34/IL1B/ENG/MYADM/EHD4/RALB/NCOR1/STK11/CALM1/CRY2/MADD/TCL1B/PPP1R9B/FYN/CD6/MFHAS1/STK38/CAMK1/STAT2/EPHA8/PGAM1/CCNY/TP53/RGS14/TIRAP/CTDSP1/SMPD1/MAP2K3/CCNF/LTF/MET/PTK2B/SPTBN4/ARRB1/PDK3/CRKL/NUP62/CEBPA/RHOA/PPP1R7/ACTB/HSP90AB1/DUSP3/CDK9/ARRB2/UNC119/CDKN1A/CD300A/PDPK1/TESK1/SPHK2/IRAK1/CTDSP2/IKBKB/P2RX7/MARCO/EP300/HSPB1/IL18/S…
GO:0051174	BP	regulation of phosphorus metabolic process	979	-0.282116	-1.19636	0.00877193	0.175778	0.157746	2049	tags=19%, list=15%, signal=18%	LILRA5/SIRT2/FGF23/EIF4G1/LILRB2/MAP3K12/PRKAR2A/GIT1/DHX34/IL1B/ENG/MYADM/EHD4/RALB/NCOR1/STK11/CALM1/CRY2/MADD/TCL1B/PPP1R9B/FYN/CD6/MFHAS1/STK38/CAMK1/STAT2/EPHA8/PGAM1/CCNY/TP53/RGS14/TIRAP/CTDSP1/SMPD1/MAP2K3/CCNF/LTF/MET/PTK2B/SPTBN4/ARRB1/PDK3/CRKL/NUP62/CEBPA/RHOA/PPP1R7/ACTB/HSP90AB1/DUSP3/CDK9/ARRB2/UNC119/CDKN1A/CD300A/PDPK1/TESK1/SPHK2/IRAK1/CTDSP2/IKBKB/P2RX7/MARCO/EP300/HSPB1/IL18/S…
GO:1990089	BP	response to nerve growth factor	30	-0.593989	-1.63273	0.0091954	0.176144	0.158074	1516	tags=33%, list=11%, signal=30%	EIF4A3/CRK/RAPGEF1/RAB35/CSNK1D/CORO1A/CBL/SORT1/EHD1/FOXO3
GO:1990090	BP	cellular response to nerve growth factor stimulus	30	-0.593989	-1.63273	0.0091954	0.176144	0.158074	1516	tags=33%, list=11%, signal=30%	EIF4A3/CRK/RAPGEF1/RAB35/CSNK1D/CORO1A/CBL/SORT1/EHD1/FOXO3
GO:0051180	BP	vitamin transport	30	-0.593722	-1.632	0.0091954	0.176144	0.158074	3100	tags=43%, list=23%, signal=33%	SLC46A1/SCARB1/FOLR2/SLC19A2/SLC2A6/TCN2/CD320/SLC2A8/SLC5A6/FOLR3/SLC27A1/SLC2A3/SLC19A1
GO:0005775	CC	vacuolar lumen	136	-0.422128	-1.50377	0.00920245	0.176144	0.158074	1759	tags=31%, list=13%, signal=27%	ATP13A2/PTGES2/PA2G4/SMPD1/ANXA2/ARSA/FTL/NEU1/TOLLIP/PSMD1/MAN2B2/NCAN/GM2A/SGSH/PADI2/STK11IP/GUSB/GLA/CD74/GAA/PYGB/DAPK2/PSAP/DYNC1H1/VAT1/GPC6/RNASET2/CYB5R3/GNS/TRAPPC1/VCP/UNC13D/IMPDH1/PYCARD/GBA/MAN2B1/IFI30/GRN/TPP1/CTSB/CTSD/CTSA
GO:0042581	CC	specific granule	133	-0.414359	-1.46372	0.00914634	0.176144	0.158074	1581	tags=32%, list=12%, signal=29%	ANXA11/VCL/LTF/TOM1/CYBA/NEU1/TOLLIP/STX4/FOLR3/DNAJC5/TMBIM1/PDXK/SLC2A3/ACAA1/CTSZ/TMEM63A/SLC44A2/GHDC/TMC6/CNN2/NFKB1/CEACAM3/ORM1/P2RX1/ADAM8/AP1M1/ITGB2/CKAP4/TNFRSF1B/LRG1/ITGAM/DOCK2/SPTAN1/CFP/PLAUR/STK10/OSCAR/ITGAL/UBR4/LCN2/PGLYRP1/STXBP2/CTSD
GO:0043903	BP	regulation of biological process involved in symbiotic interaction	47	-0.542907	-1.65055	0.00943396	0.178709	0.160376	1804	tags=36%, list=13%, signal=31%	GSN/IFITM3/LTF/TRIM8/TRIM11/P4HB/CD74/FCN1/TRIM38/IFITM2/CD4/TRIM25/LY6E/LGALS9/TRIM21/TRIM26/HLA-DRB1
GO:0016459	CC	myosin complex	32	-0.574682	-1.59171	0.00941176	0.178709	0.160376	1547	tags=22%, list=12%, signal=19%	MYO9A/MYL4/MYL9/MYO1G/MYH9/MYO9B/MYO1F
GO:0045216	BP	cell-cell junction organization	138	-0.406531	-1.44537	0.00943396	0.178709	0.160376	2442	tags=23%, list=18%, signal=19%	JAM3/RAMP2/SRC/GJC1/CLDN14/CDH9/JUP/IL1B/PTPN23/TBCD/ACTG1/EXT1/VCL/RHOA/ACTB/ESAM/IKBKB/PECAM1/OCEL1/SRF/FLNA/CLDN5/FSCN1/CTNNA1/ARL2/GPBAR1/ADD1/WDR1/CSF1R/CSK/PIP5K1C/TLN1
GO:0030595	BP	leukocyte chemotaxis	173	-0.372167	-1.37625	0.00940439	0.178709	0.160376	1136	tags=18%, list=9%, signal=17%	PADI2/ALOX5/GBF1/IL6R/CXCL16/CD74/RAC2/DAPK2/CORO1A/BSG/VAV1/LYN/NINJ1/ADAM8/LGALS9/CALR/ITGB2/CSF1R/NCKAP1L/GPSM3/TNFSF14/RIN3/PIP5K1C/SPI1/SYK/C5AR1/WNK1/MAPK3/PIK3CD/MPP1/CSF3R/IL17RA
GO:0031398	BP	positive regulation of protein ubiquitination	96	0.488781	1.56304	0.00946372	0.178811	0.160467	2671	tags=38%, list=20%, signal=30%	RBX1/BMI1/UBE2N/PSMD10/PTPN22/FBXO33/DCUN1D5/PELI1/UBE2V2/NDFIP1/BIRC3/DERL1/UBQLN1/NMI/DCUN1D4/PDCD6/BIRC2/PTEN/TOPORS/MAPK9/RNF20/RIPK2/SKP2/ARRDC3/FBXO4/LRRK2/CTR9/NOD2/DDX3X/MASTL/RCHY1/NDFIP2/MALT1/ARRDC4/CRY1/RPS2
GO:0098978	CC	glutamatergic synapse	200	-0.368211	-1.37223	0.00949367	0.178915	0.160561	2331	tags=24%, list=17%, signal=20%	PRKCZ/GIPC1/SRC/STX1A/ATP2B4/CLSTN1/KPNA1/FBXL20/CADPS/CAMK1/DLGAP4/RGS14/LRFN3/EIF4A3/PTK2B/DBN1/RHOA/ACTB/AP3D1/AP2B1/STX4/GRIPAP1/PFN1/PACSIN2/SPTBN1/ADORA2A/BIN1/SLITRK1/RELA/SLC30A3/CORO1A/VPS18/GSK3B/HIP1/RAB8A/LYN/FLOT2/P2RX1/VCP/NAPA/PPP2R1A/PPP1CA/FLOT1/DNM2/AP2M1/RNF10/ACTN1/NRGN
GO:0002886	BP	regulation of myeloid leukocyte mediated immunity	50	-0.530859	-1.62576	0.00959233	0.178935	0.160579	1683	tags=46%, list=13%, signal=40%	CD84/HMOX1/CD300A/PDPK1/SPHK2/STX4/TYROBP/IL4R/TICAM1/HLA-E/RAC2/LYN/LGALS9/GATA1/ITGB2/ITGAM/UNC13D/PTAFR/SPI1/SYK/FES/PRAM1/STXBP2
GO:0048002	BP	antigen processing and presentation of peptide antigen	50	-0.529717	-1.62226	0.00959233	0.178935	0.160579	2030	tags=42%, list=15%, signal=36%	HLA-DRB4/HLA-F/TAPBPL/ERAP2/FCER1G/TAP1/IKBKB/HLA-E/HLA-DMA/HLA-C/CD74/HLA-B/HLA-A/CALR/PYCARD/TAPBP/IFI30/DNM2/CTSD/HLA-DRB1/HLA-DRB5
GO:0006949	BP	syncytium formation	39	-0.537653	-1.56971	0.00952381	0.178935	0.160579	1302	tags=28%, list=10%, signal=26%	CAMK1/TYROBP/IL4R/DYRK1B/TCTA/SBNO2/TNFSF14/EHD1/CFLAR/FLOT1/MYH9
GO:0051056	BP	regulation of small GTPase mediated signal transduction	214	-0.373144	-1.39829	0.00958466	0.178935	0.160579	2577	tags=29%, list=19%, signal=24%	RAF1/PREX1/AKAP13/TIAM2/CDC42SE1/PIK3CG/RASGRP4/FGD2/SIPA1L1/SRC/DENND4C/RASA3/ARHGDIB/SGSM3/ARFGAP1/MADD/ARHGAP26/RGL2/LZTR1/SPATA13/MYO9A/MET/ARHGAP9/ARRB1/NUP62/STK19/CRK/ARHGEF18/RHOF/TGM2/DEF6/RALBP1/GBF1/KCTD13/ARHGAP4/P2RY8/TSC2/IQSEC1/NOTCH1/PSD4/VAV1/FGD3/ARHGEF1/SIPA1/CBL/PLEKHG3/DENND3/ARHGEF2/SIPA1L3/MFN2/ARHGAP30/DOCK2/SQSTM1/ARHGAP1/ITPKB/FBP1/GMIP/RAP1GAP/SH3BP1/FLOT1/DNM2/MYO9B/AR…
GO:0019900	MF	kinase binding	582	-0.305838	-1.26053	0.00966184	0.179774	0.161332	2507	tags=29%, list=19%, signal=24%	CEBPB/PRKAB1/IRF5/SV2A/DUSP2/ITGAX/CBLB/CD247/LAX1/ELMO2/GP6/PIH1D1/FBXO7/DCTN2/PRKCZ/MAP2K7/SRC/STX1A/EPHA1/SH2B3/PARP16/VDAC1/ATP2B4/LRBA/TPCN2/CEACAM1/JUP/GAB2/PICK1/TBC1D14/MAP3K12/PRKAR2A/TRIP6/RCC2/DOK2/ARTN/CASP9/PTPN23/CEACAM4/CALM1/TFPT/CRY2/TCL1B/PPP1R9B/CD6/CADPS/GSN/AP1B1/STK38/PGAM1/CCNY/B3GALT4/USF1/TP53/AP2A2/TRAP1/MAPKAPK2/RGS14/ADCY4/ZBTB4/TIRAP/MAP2K3/EEF2/STUB1/SKI/TUBA4A/TRADD…
GO:0048524	BP	positive regulation of viral process	54	-0.521045	-1.62329	0.00977995	0.181053	0.162479	1528	tags=30%, list=11%, signal=26%	LARP1/DDB1/TRIM11/TBC1D20/P4HB/CD74/TRIM38/NOTCH1/CD4/LGALS9/TRIM21/ADAR/RAD23A/VPS37B/KPNA6/HLA-DRB1
GO:0060560	BP	developmental growth involved in morphogenesis	155	-0.393413	-1.41823	0.00977199	0.181053	0.162479	1585	tags=19%, list=12%, signal=17%	EXT1/VCL/SEMA4B/DBN1/HSP90AB1/BIN3/ULK1/SIN3A/EIF2AK4/CTTN/SRF/HDAC6/DISC1/TWF2/GDI1/ARHGAP4/NOTCH1/GSK3B/DBNL/MED12/DDR1/TRPV2/TRIM28/SEMA4D/DSCAM/CYFIP2/CPNE1/DNM2/SEMA4A
GO:0022604	BP	regulation of cell morphogenesis	220	-0.380336	-1.42806	0.00993377	0.182976	0.164205	2919	tags=35%, list=22%, signal=28%	FGR/PRKDC/CUX1/ALDOA/NEDD9/ATP10A/SYT3/SPRY4/PLEKHO1/RAC1/ITGA7/PLXNA3/SPARC/PREX1/CDC42SE1/ZRANB1/FGD2/PARVB/DOCK5/SRC/PAFAH1B1/CORO1B/PLXND1/FBXO31/TRIOBP/RCC2/MYADM/FYN/S100A10/MPL/SH3KBP1/EPB41/MYO9A/PTK2B/CRKL/DBN1/RHOA/CRK/TESK1/ARHGEF18/RHOF/GNA12/BCL9L/CDC42EP2/P4HB/FLNA/TAOK2/RAC2/LST1/DAB2/DVL3/CORO1A/HCK/CDC42EP4/MOV10/DBNL/FGD3/SLC9A3R1/CALR/MARK2/WDR1/CFL1/ITGB2/FMNL1/UNC13D/CSF1R/SE…
GO:0044403	BP	biological process involved in symbiotic interaction	221	-0.375266	-1.41026	0.00993377	0.182976	0.164205	1832	tags=27%, list=14%, signal=23%	ITGB5/VPS4A/MYD88/GSN/IFITM3/SMPD1/LTF/CTDP1/NCAM1/DDB1/SLC1A5/HSP90AB1/CDK9/TRIM8/EP300/TRIM11/CCNK/CHMP4B/EIF2AK4/CFHR2/SMARCA4/TBC1D20/HDAC1/P4HB/ZBED1/CD74/SMARCB1/FCN1/SP1/TRIM38/BSG/IFITM2/VPS18/CD4/THOC5/TRIM25/LY6E/SELPLG/GAPDH/CBL/LGALS9/CHMP1A/CFL1/ITGB7/IFI27/TRIM21/CSF1R/ATG7/LAMP1/IGF2R/TRIM26/GPX1/ITGA5/VPS37B/PGLYRP1/CTSB/ANPEP/BCL2L1/HLA-DRB1
GO:1901224	BP	positive regulation of NIK/NF-kappaB signaling	59	-0.511873	-1.61302	0.00997506	0.183276	0.164475	2122	tags=36%, list=16%, signal=30%	AGER/TRIP6/IL1B/EIF2AK2/TRIM44/TRADD/RHOA/IRAK1/EP300/IL18/PTP4A3/RELA/LAPTM5/LGALS9/CALR/IFI35/RBCK1/TNFSF14/NLRP12/CD14/ACTN4
GO:0051928	BP	positive regulation of calcium ion transport	82	-0.481732	-1.61384	0.0100756	0.18466	0.165717	1442	tags=32%, list=11%, signal=28%	EHD3/CDK5/BAK1/P2RX4/GJC2/LILRA5/CALM1/LILRA2/GSTM2/ARRB2/PDPK1/SPHK2/P2RX7/BAX/BDKRB1/STIM1/PLCG1/PLCG2/ORAI1/CALM3/SNCA/TSPO/P2RX1/TRPV2/SLC9A1/G6PD
GO:0034446	BP	substrate adhesion-dependent cell spreading	83	-0.472645	-1.58309	0.0101781	0.186074	0.166986	2833	tags=35%, list=21%, signal=28%	NEDD9/SPRY4/RAC1/PREX1/PARVB/DOCK5/SRC/EPHA1/TRIOBP/RCC2/MYADM/S100A10/MEGF9/CRKL/RHOA/CRK/TESK1/FZD7/P4HB/PXN/FLNA/DAB2/CALR/ITGB7/FERMT3/UNC13D/PARVG/DNM2/ACTN4
GO:0019058	BP	viral life cycle	248	-0.361336	-1.3704	0.0102041	0.186085	0.166995	1832	tags=26%, list=14%, signal=23%	ITGB5/RAB43/VPS4A/GSN/IFITM3/OAS1/EIF2AK2/SMPD1/ISG20/LARP1/LTF/MX1/NCAM1/DDB1/SLC1A5/HSP90AB1/TRIM8/PARP10/TRIM11/CCNK/OASL/CHMP4B/EIF2AK4/TBC1D20/P4HB/ZBED1/CD74/VPS37C/RAB1B/SMARCB1/FCN1/TRIM38/BSG/IFITM2/VPS18/NOTCH1/APOBEC3C/PCBP2/CD4/TRIM25/LY6E/SELPLG/LGALS9/SETDB1/CHMP1A/ITGB7/VCP/IFI27/TRIM21/ADAR/FURIN/TRIM28/LAMP1/TNIP1/ZNFX1/RAD23A/TRIM26/ATG16L2/ITGA5/VPS28/VPS37B/KPNA6/CTSB/ANPEP/HL…
GO:0008173	MF	RNA methyltransferase activity	36	0.59438	1.62053	0.0102564	0.18625	0.167143	1907	tags=39%, list=14%, signal=33%	METTL5/TFB2M/EMG1/METTL4/BCDIN3D/TYW3/TARBP1/THUMPD2/FBL/TRMT12/NSUN2/TRMT11/NSUN6/LCMT2
GO:2001020	BP	regulation of response to DNA damage stimulus	182	0.421891	1.43834	0.0102639	0.18625	0.167143	1916	tags=24%, list=14%, signal=21%	RPL26/DEK/TPT1/ZMPSTE24/UBE2N/PSMD10/MORF4L1/SIRT1/NSMCE4A/EEF1E1/ACTR2/UBE2V2/MORF4L2/SPRED1/ACTL6A/TRIP12/SMCHD1/MYC/RNASEH2B/YEATS4/CEBPG/HMGB1/TRIAP1/FXR1/PYHIN1/SMG1/CCDC117/USP1/RPA2/DDX5/FBXO5/THOC1/PMAIP1/RIF1/BID/DYRK1A/PARP9/USP47/BRCC3/BCL2/ZNF365/SETMAR/UBR5/ARID2
GO:1904064	BP	positive regulation of cation transmembrane transport	90	-0.448585	-1.52577	0.0104167	0.188555	0.169212	1392	tags=20%, list=10%, signal=18%	GSTM2/PDPK1/BAX/BDKRB1/STIM1/PLCG1/FLNA/PINK1/PLCG2/CALM3/SNCA/P2RX1/WNK1/SLC9A1/DNM2/TESC/ACTN4/G6PD
GO:0003955	MF	NAD(P)H dehydrogenase (quinone) activity	31	0.630107	1.66493	0.0106572	0.188733	0.169371	660	tags=26%, list=5%, signal=25%	NDUFA4/NDUFB3/NDUFB2/NDUFS4/NDUFA1/NDUFS5/NDUFB5/CBR4
GO:0030280	MF	structural constituent of skin epidermis	18	-0.672666	-1.65425	0.0109409	0.188733	0.169371	322	tags=44%, list=2%, signal=43%	KRT10/KRT3/KRT6B/KRT78/SPRR1A/KRT72/KRT1/PI3
GO:0019200	MF	carbohydrate kinase activity	18	-0.670305	-1.64845	0.0109409	0.188733	0.169371	1622	tags=39%, list=12%, signal=34%	NAGK/PFKFB3/GALK1/PFKFB4/PFKP/PFKL/HK3
GO:0051647	BP	nucleus localization	18	-0.669698	-1.64696	0.0109409	0.188733	0.169371	1240	tags=44%, list=9%, signal=40%	PAFAH1B1/FHOD1/DCTN1/BIN1/NUDC/DYNC1H1/SLC9A3R1/TRIM58
GO:0016814	MF	hydrolase activity, acting on carbon-nitrogen (but not peptide) bonds, in cyclic amidines	24	-0.625355	-1.64673	0.0110619	0.188733	0.169371	1046	tags=29%, list=8%, signal=27%	ZBP1/ADA/ADAT1/APOBEC3C/ATIC/ADAR/CDA
GO:0055106	MF	ubiquitin-protein transferase regulator activity	21	0.681678	1.64137	0.0107335	0.188733	0.169371	339	tags=19%, list=3%, signal=19%	RPL23/RPL5/RPL11/RPS20
GO:0006096	BP	glycolytic process	67	-0.510997	-1.63514	0.0104987	0.188733	0.169371	1964	tags=37%, list=15%, signal=32%	GIT1/ENO3/TPI1/NCOR1/PGAM1/ENO2/PGAM4/GALK1/P2RX7/EP300/PFKP/ZBTB20/ZBTB7A/PGM1/ARL2/PFKL/OGDH/GAPDH/HK3/ALDOC/FBP1/ENO1/STAT3/GPI/SLC4A1
GO:0006757	BP	ATP generation from ADP	67	-0.510997	-1.63514	0.0104987	0.188733	0.169371	1964	tags=37%, list=15%, signal=32%	GIT1/ENO3/TPI1/NCOR1/PGAM1/ENO2/PGAM4/GALK1/P2RX7/EP300/PFKP/ZBTB20/ZBTB7A/PGM1/ARL2/PFKL/OGDH/GAPDH/HK3/ALDOC/FBP1/ENO1/STAT3/GPI/SLC4A1
GO:0010310	BP	regulation of hydrogen peroxide metabolic process	16	-0.677623	-1.6202	0.0106838	0.188733	0.169371	1815	tags=44%, list=14%, signal=38%	RAC1/FYN/NOXO1/RAC2/HDAC6/PINK1/SNCA
GO:0061436	BP	establishment of skin barrier	16	-0.673149	-1.6095	0.0106838	0.188733	0.169371	2320	tags=31%, list=17%, signal=26%	TMEM79/MET/ELOVL1/ALOX12/KRT1
GO:0090043	BP	regulation of tubulin deacetylation	13	0.73743	1.60317	0.0108893	0.188733	0.169371	1754	tags=46%, list=13%, signal=40%	DR1/ZZZ3/PRKAA1/BEX4/MBIP/FNTA
GO:0007620	BP	copulation	14	-0.683652	-1.56104	0.0106838	0.188733	0.169371	918	tags=43%, list=7%, signal=40%	CNR1/OXTR/AVP/ADA/P2RX1/PI3
GO:0006352	BP	DNA-templated transcription, initiation	98	0.469192	1.51081	0.0109546	0.188733	0.169371	1425	tags=28%, list=11%, signal=25%	TAF7/DR1/SUB1/TFAM/PSMC6/E2F3/GTF2F2/SMARCA5/TFB2M/MED4/GTF2E1/TBPL1/GTF2B/ZNF451/MYC/MED30/GTF2E2/RRN3/HMGB1/CCNH/DHX36/TAF5/GTF2H5/CAND1/PPM1D/GTF2A2/TAF2
GO:0007043	BP	cell-cell junction assembly	98	-0.442153	-1.50385	0.0110193	0.188733	0.169371	2442	tags=26%, list=18%, signal=21%	JAM3/RAMP2/GJC1/CLDN14/CDH9/JUP/IL1B/TBCD/ACTG1/VCL/RHOA/ACTB/ESAM/IKBKB/PECAM1/OCEL1/SRF/CLDN5/FSCN1/CTNNA1/ARL2/GPBAR1/WDR1/PIP5K1C/TLN1
GO:0002688	BP	regulation of leukocyte chemotaxis	95	-0.441059	-1.50217	0.0108108	0.188733	0.169371	1136	tags=19%, list=9%, signal=17%	PADI2/IL6R/CD74/RAC2/DAPK2/LYN/LGALS9/CALR/CSF1R/NCKAP1L/GPSM3/TNFSF14/RIN3/SPI1/C5AR1/WNK1/MAPK3/MPP1
GO:2000045	BP	regulation of G1/S transition of mitotic cell cycle	113	0.457863	1.49171	0.0107527	0.188733	0.169371	1869	tags=22%, list=14%, signal=19%	RPL26/ANXA1/TMEM14B/RPS27L/PLRG1/PPP2CA/CRLF3/SLFN11/CDKN1B/ACVR1/TRIAP1/CCNH/AIF1/PKD2/PTEN/ID2/RB1/RPA2/WAC/RDX/BID/CUL4B/BCL2/RBL2/KLF4
GO:0022900	BP	electron transport chain	113	0.453698	1.47814	0.0107527	0.188733	0.169371	2647	tags=34%, list=20%, signal=27%	COX7C/NDUFA4/UQCRQ/NDUFB3/NDUFB2/NDUFS4/NDUFA1/NDUFS5/NDUFAB1/SDHD/NDUFB5/CHCHD2/DNAJC15/CYBB/PARK7/DLD/GHITM/ME2/ETFA/SLC25A13/BID/UQCRB/UQCRH/DEGS1/NDUFV2/COX6A1/UQCRFS1/STEAP4/NDUFS3/NDUFA8/CIAPIN1/IMMP2L/NDUFC1/NDUFB7/SLC25A12/CYB5A/CYCS/NDUFA12
GO:0009132	BP	nucleoside diphosphate metabolic process	105	-0.425907	-1.47074	0.0108108	0.188733	0.169371	1964	tags=29%, list=15%, signal=25%	GIT1/ENO3/TPI1/NCOR1/CARD11/PGAM1/ENO2/PGAM4/GALK1/NME2/P2RX7/EP300/PFKP/ZBTB20/ZBTB7A/PGM1/ARL2/PFKL/OGDH/GAPDH/HK3/ALDOC/FBP1/GUK1/NME4/ENO1/STAT3/GPI/MPP1/SLC4A1
GO:0002020	MF	protease binding	105	-0.423535	-1.46255	0.0108108	0.188733	0.169371	1521	tags=23%, list=11%, signal=20%	TP53/ANXA2/CSTB/POLG/MBP/STIM1/ADRM1/BIN1/PINK1/DVL3/PSAP/GSK3B/CST3/OS9/SELL/NDUFS7/VCP/FURIN/PYCARD/RAD23A/RHBDD2/CFLAR/FLOT1/TIMP1
GO:0007266	BP	Rho protein signal transduction	98	-0.428534	-1.45753	0.0110193	0.188733	0.169371	1479	tags=22%, list=11%, signal=20%	MET/ARRB1/RHOA/ARHGEF18/GNA12/RALBP1/CDC42EP2/KCTD13/ARHGAP4/P2RY8/CDC42EP4/ARHGEF1/TAX1BP3/ROPN1B/ARHGEF2/CFL1/ARHGAP1/WAS/FLOT1/MYO9B/RHOG/ARHGDIA
GO:0045785	BP	positive regulation of cell adhesion	359	-0.336047	-1.33356	0.0109091	0.188733	0.169371	2426	tags=27%, list=18%, signal=23%	NLRP3/GP6/DOCK5/ZBTB7B/HLA-DRB3/PRKCZ/SRC/ZP3/TFE3/EPHA1/ST3GAL4/AGER/IL27RA/SOX13/JUP/HLA-DRB4/LILRB2/TRIOBP/IL1B/MYADM/NFKBID/PTPN23/JAK1/FUT7/CARD11/ZMIZ1/FYN/CD6/S100A10/IL10/CD5/SIRPB1/PTK2B/CRKL/RHOA/AP3D1/CRK/TESK1/DHPS/STX4/EMILIN2/IRAK1/IL4R/TGM2/IL18/SOX12/HLA-E/RRAS/HLA-DMA/ZFHX3/ALOX5/STAT5B/SPOCK2/P4HB/ADA/FLNA/CD74/RELA/DISC1/DAB2/CORO1A/GSK3B/ARL2/CD4/CCDC88B/PPM1F/VAV1/FCHO1/LYN/F…
GO:0030695	MF	GTPase regulator activity	332	-0.340939	-1.33348	0.0110701	0.188733	0.169371	2035	tags=25%, list=15%, signal=21%	SGSM2/TBC1D14/SGSM3/GPS1/GIT1/RCC2/ARHGDIG/TBC1D16/ARFGAP1/MADD/ARHGAP26/TBCD/TBC1D2/EIF2B4/HERC1/RGS14/RGL2/SPATA13/RIN1/MYO9A/TBC1D22B/ARHGAP9/ARRB1/RAPGEF1/ARFGAP2/ARHGEF18/RHOF/TBC1D3G/DEF6/RASGRP2/SBF1/RALBP1/TBC1D17/RGL4/RAB3IL1/CDC42EP2/GBF1/TBC1D20/TBC1D2B/RANGAP1/RIC8A/LLGL1/RALGDS/TNK2/RAPGEF6/GDI1/TBC1D25/TBC1D10C/ARHGAP4/TSC2/IQSEC1/PSD4/VAV1/FGD3/ARHGEF1/SIPA1/PLEKHG3/DENND3/ARHGEF2/…
GO:0060589	MF	nucleoside-triphosphatase regulator activity	332	-0.340939	-1.33348	0.0110701	0.188733	0.169371	2035	tags=25%, list=15%, signal=21%	SGSM2/TBC1D14/SGSM3/GPS1/GIT1/RCC2/ARHGDIG/TBC1D16/ARFGAP1/MADD/ARHGAP26/TBCD/TBC1D2/EIF2B4/HERC1/RGS14/RGL2/SPATA13/RIN1/MYO9A/TBC1D22B/ARHGAP9/ARRB1/RAPGEF1/ARFGAP2/ARHGEF18/RHOF/TBC1D3G/DEF6/RASGRP2/SBF1/RALBP1/TBC1D17/RGL4/RAB3IL1/CDC42EP2/GBF1/TBC1D20/TBC1D2B/RANGAP1/RIC8A/LLGL1/RALGDS/TNK2/RAPGEF6/GDI1/TBC1D25/TBC1D10C/ARHGAP4/TSC2/IQSEC1/PSD4/VAV1/FGD3/ARHGEF1/SIPA1/PLEKHG3/DENND3/ARHGEF2/…
GO:0002443	BP	leukocyte mediated immunity	313	-0.335709	-1.30539	0.0106383	0.188733	0.169371	2574	tags=31%, list=19%, signal=26%	MAD2L2/CD27/HLA-H/RIPK3/ICAM1/LAT2/PIK3CG/NLRP3/IGLL1/HLA-DRB3/PRKCZ/CTSH/ZP3/C1RL/KIR3DL1/GZMM/LTA/AGER/IL27RA/CEACAM1/GAB2/HLA-DRB4/SLC15A4/IL1B/HLA-F/TREM1/FUT7/MYD88/IL10/CD84/HMOX1/LAG3/GNL1/SERPING1/FCER1G/AP1G1/ARRB2/CRK/CD300A/PDPK1/SPHK2/STX4/TYROBP/P2RX7/IL4R/BTN3A2/IL18/TICAM1/HLA-E/SUPT6H/TCIRG1/LAT/HLA-DMA/STAT5B/CD74/RAC2/NKG7/HLA-B/NCR3/AHR/PLEKHM2/PLCG2/CORO1A/STAT6/FCGR3A/VAV1/LY…
GO:0005543	MF	phospholipid binding	318	-0.33444	-1.30105	0.0108303	0.188733	0.169371	2091	tags=25%, list=16%, signal=21%	TPCN2/GGA2/GAB2/FCGR3B/PICK1/PLCD1/SNX22/CHMP2A/MFGE8/ZFYVE19/MAP1LC3A/PIK3C2B/GSN/ARHGAP26/NUMA1/ATP13A2/NOXO1/SNX8/TIRAP/ANXA11/CD300LF/EPB41/ANXA2/TOM1/NCF1B/PLEKHB2/SPTBN4/ARHGAP9/NUP62/PHF12/CD300A/HS1BP3/PLEK2/RAB35/NISCH/PFN1/PITPNC1/PACSIN2/SPTBN1/LDLRAP1/FZD7/SNX17/GBF1/PLEKHF1/BIN1/BSCL2/ANXA5/TWF2/PITPNM1/WDR45/RAPGEF6/SNX27/PSAP/GPAA1/PSD4/HIP1/SNCA/OSBPL5/SYTL3/HGS/VAMP2/MYO1G/EPN1/A…
GO:0030426	CC	growth cone	119	-0.423761	-1.47978	0.0111732	0.190048	0.170552	2042	tags=27%, list=15%, signal=23%	SIRT2/MAP3K12/NDEL1/PPP1R9B/IGHMBP2/ENO2/MYO9A/PTK2B/DBN1/HSP90AB1/FKBP15/KATNB1/CTTN/FXR2/FLNA/TAOK2/NEO1/PINK1/FSCN1/DISC1/TWF2/ARHGAP4/CALM3/GDPD5/SNCA/CBL/COPA/EXOC3/TRPV2/BASP1/DSCAM/DNM2
GO:0016052	BP	carbohydrate catabolic process	120	-0.425251	-1.4836	0.0112994	0.19175	0.17208	2116	tags=33%, list=16%, signal=28%	GLYCTK/TKTL1/GIT1/ENO3/GALT/TPI1/NCOR1/FUT7/PGAM1/ENO2/TP53/PGAM4/MAN2C1/GALK1/NEU1/PHKG2/P2RX7/GM2A/EP300/PFKP/ZBTB20/AOAH/ZBTB7A/PGM1/GUSB/GAA/PYGB/ARL2/PFKL/OGDH/GAPDH/HK3/ALDOC/FBP1/PPP1CA/PGD/ENO1/STAT3/GPI/SLC4A1
GO:1905906	BP	regulation of amyloid fibril formation	10	0.787043	1.59844	0.0114068	0.193126	0.173314	130	tags=20%, list=1%, signal=20%	PFDN5/VBP1
GO:0000151	CC	ubiquitin ligase complex	227	0.401301	1.39484	0.0115607	0.19528	0.175247	2286	tags=28%, list=17%, signal=24%	RBX1/CRBN/YPEL5/BMI1/UBE2E1/CUL5/UBE2N/KLHL9/FAM8A1/KLHDC2/FBXO33/FBXL3/FEM1C/DCUN1D5/KLHL2/ATG3/ANAPC13/RNF14/UBE4A/MKLN1/KBTBD7/DERL1/KLHL24/KBTBD8/ANAPC4/ANAPC10/SPOPL/DCUN1D4/MED30/CDKN1B/CKS2/RNF7/PDCD6/FBXO8/CAND1/WWP1/KLHL20/CKS1B/FBXO11/FBXO38/TOPORS/CUL2/CDC26/RNF20/USP47/CUL4B/BRCC3/SKP2/CDC23/PCGF5/UBE2A/PCGF6/FBXO4/FEM1B/GLMN/CDC16/MED10/APPBP2/SUGT1/SEL1L/WDR26/KLHL8/NEDD4/ANAPC7
GO:0046503	BP	glycerolipid catabolic process	42	-0.536578	-1.59494	0.0117925	0.198737	0.178349	3344	tags=48%, list=25%, signal=36%	FAAH/APOC1/ABHD5/LIPE/LDLR/ABHD6/ABHD12B/MGLL/SCARB1/PLA2G4C/PIK3CG/SMPD4/DAGLB/GDE1/LYPLA2/ABHD2/PNPLA6/PNPLA7/PNPLA2/SORL1
GO:0005882	CC	intermediate filament	75	-0.481645	-1.58902	0.0120773	0.200435	0.179873	3529	tags=27%, list=26%, signal=20%	KRT3/KRT6B/KRTAP10-3/KRTAP11-1/EIF6/KRT78/EVPL/TCHP/KRT23/JUP/LMNB2/VIM/LDLRAP1/ADORA2A/NARF/KRT72/KRT1/MICAL1/LMNA/HLA-DRB1
GO:0050433	BP	regulation of catecholamine secretion	35	-0.556992	-1.57536	0.0120192	0.200435	0.179873	4604	tags=57%, list=34%, signal=38%	SYT11/OPRK1/OXT/SYT10/SYT7/SYT9/DRD3/CNR1/SYT15/CHGA/GABBR1/OXTR/ADRA2A/SYT3/STX1A/ADRA2B/GRM2/ADORA2A/PINK1/SNCA
GO:0030017	CC	sarcomere	132	-0.40261	-1.42406	0.012012	0.200435	0.179873	2407	tags=25%, list=18%, signal=21%	PARVB/PGM5/ARF1/TPM4/ATP2B4/LMAN1/JUP/STK11/CALM1/FHL2/MYBPC3/STUB1/HSPB1/MYOM2/MYL4/SPTBN1/MYL9/BIN1/FLNA/CALM3/PDLIM1/CSRP1/TMOD1/PAK1/SQSTM1/FKBP1A/FHL3/CAPZB/ENO1/PDLIM7/ACTN4/SLC4A1/ACTN1
GO:0010810	BP	regulation of cell-substrate adhesion	161	-0.377992	-1.38844	0.0120846	0.200435	0.179873	2389	tags=25%, list=18%, signal=21%	DOCK5/PRKCZ/SRC/EPHA1/CLASP1/PTPRA/JUP/TRIOBP/RCC2/MYADM/TBCD/S100A10/ACTG1/VCL/PTK2B/CRKL/RHOA/DUSP3/CRK/TESK1/RRAS/FZD7/SPOCK2/P4HB/FLNA/RAC2/DISC1/DAB2/NOTCH1/GSK3B/ARL2/PPM1F/DDR1/CALR/UNC13D/CD3E/SLC9A1/ITGA5/DNM2/ACTN4
GO:0098742	BP	cell-cell adhesion via plasma-membrane adhesion molecules	147	-0.383395	-1.37737	0.0120482	0.200435	0.179873	2318	tags=20%, list=17%, signal=17%	PCDHAC2/CLSTN1/CLDN14/CDH9/CEACAM1/PCDHB9/MYADM/PTPN23/FGFRL1/ROBO3/CD6/IL10/CD84/LRFN3/FXYD5/ESAM/MBP/PECAM1/RIC8A/SLITRK1/CLDN5/BSG/GPC6/ITGB2/SELL/ITGAM/ITGAL/DSCAM/WNK1/ITGA5
GO:0061061	BP	muscle structure development	408	-0.324215	-1.30233	0.0119522	0.200435	0.179873	1536	tags=18%, list=11%, signal=17%	TBX18/BTG2/ENG/FGFRL1/FHL2/HMG20B/MYBPC3/CAMK1/MEF2D/ACTG1/HIF1AN/SKI/BCL9/CTDP1/RHOA/HIVEP3/CDK9/ARRB2/BIN3/KEL/IL4R/EP300/IL18/ZNF689/MYOM2/DYRK1B/ANKRD33/YY1/SUPT6H/CMTM5/FZD7/RNF165/ZFHX3/GTF3C5/MYL9/EMD/SRF/BIN1/PTBP1/MAP3K5/ZFPM1/NOTCH1/LY6E/PDLIM1/FLOT2/NINJ1/CSRP1/PRR14/CALR/WDR1/TMOD1/BASP1/HLX/TNFSF14/SORT1/FKBP1A/FHL3/EHD1/FLII/RBM38/GPX1/RARA/SLC9A1/PDLIM7/CFLAR/FLOT1/MYH9/MEGF10/ACTN…
GO:0010243	BP	response to organonitrogen compound	725	-0.294424	-1.22302	0.011976	0.200435	0.179873	1884	tags=20%, list=14%, signal=18%	VIM/MAP1LC3A/GRM2/STK11/JAK1/FUT7/CRY2/NDEL1/MYD88/PPP1R9B/FYN/EIF2B4/STAT2/IL10/WDTC1/USF1/TP53/SLC2A8/MAN1B1/EDEM2/EIF4EBP2/SSH1/LEPROT/ANKZF1/EXT1/SMPD1/STUB1/LARP1/ATP1A3/CYBA/FCER1G/PTK2B/KLF2/UROS/RHOA/GSTM2/FBXO6/ACTB/HSP90AB1/MTHFR/ARRB2/CRK/RAPGEF1/PDPK1/NCOR2/P2RX7/SLC26A6/TGM2/CES1/SLC27A1/NLRP1/TICAM1/TRIM41/APRT/HNRNPD/CCND3/SIN3A/PTPRE/RNF40/PTPN1/STAT5B/UBE4B/ADORA2A/SH2B2/RANGAP1/…
GO:0072331	BP	signal transduction by p53 class mediator	122	0.440882	1.44105	0.0121951	0.201811	0.181108	1870	tags=24%, list=14%, signal=21%	RPL26/RPL23/HINT1/RPL5/ZMPSTE24/RPL11/PSMD10/SIRT1/RPS27L/RPS20/EEF1E1/SPRED1/MYC/CDKN1B/RRM2B/RRN3/TRIAP1/PYHIN1/C16orf72/DDX5/PPM1D/PMAIP1/TOPORS/DYRK1A/PAK1IP1/RPS7/BCL2/TP53RK/SP100
GO:0031032	BP	actomyosin structure organization	143	-0.398012	-1.42097	0.0123077	0.202304	0.181551	1832	tags=23%, list=14%, signal=20%	ITGB5/VPS4A/S100A10/ACTG1/EPB41/MET/PTK2B/ARRB1/RHOA/EVL/TESK1/ARHGEF18/FHOD1/MYOM2/PFN1/MYL9/SRF/PXN/CNN2/KCTD13/PPM1F/PDLIM1/CSRP1/WDR1/TMOD1/PAK1/FLII/SLC9A1/WAS/CFLAR/MYH9/ZYX/WASF2
GO:0070820	CC	tertiary granule	136	-0.39503	-1.40724	0.0122699	0.202304	0.181551	1512	tags=29%, list=11%, signal=26%	LTF/CYBA/FCER1G/CSTB/RHOA/CD300A/FOLR3/TCIRG1/SLC2A3/PGM1/TMEM63A/GAA/TMC6/CNN2/SIGLEC5/TBC1D10C/NBEAL2/DBNL/CST3/ORM1/FPR1/ADAM8/ITGB2/LRG1/ITGAM/NCKAP1L/ATP6V0A1/SPTAN1/CFP/ALDOC/LAMP1/OSCAR/PTAFR/UBR4/DIAPH1/PGLYRP1/STXBP2/CTSD/CDA/MMP9
GO:0009925	CC	basal plasma membrane	189	-0.359687	-1.33957	0.0123077	0.202304	0.181551	3253	tags=29%, list=24%, signal=22%	ATP12A/ATP2B1/ERBB2/SHROOM4/SLC6A9/SLC46A1/SLC38A1/LDLR/CD38/SLC7A7/CD81/ADRA2A/SLC29A1/NOD1/KCNJ16/STX2/SLC43A3/ATP2B4/SLC14A1/SLC16A12/B4GALT1/CEACAM1/ATP1A1/SLC13A3/EPB41/SLC4A2/ANXA2/MET/SLC5A6/SLC1A5/AQP10/HSP90AB1/ARRB2/STX4/SLC6A6/SLC26A6/BEST1/SLC27A1/LDLRAP1/MAP4K2/SLC7A5/BSG/ORAI1/FLOT2/KCNJ10/SLC16A3/SLC19A1/ABCC3/C5AR1/SLC9A1/FLOT1/MSN/WASF2/SLC4A1
GO:0002274	BP	myeloid leukocyte activation	187	-0.373184	-1.38637	0.0123839	0.202648	0.181859	1859	tags=29%, list=14%, signal=25%	VSIG4/MYD88/MFHAS1/CRLF2/IL10/CD84/HMOX1/CD300LF/FCER1G/RELB/LILRA2/LTBR/CEBPA/TSPAN32/CD300A/PDPK1/SPHK2/STX4/TYROBP/IL4R/IL18/TICAM1/LAT/NDRG1/CD74/RAC2/PLCG2/NR1D1/SNCA/LYN/CBL/JUND/LGALS9/SBNO2/VAMP2/GATA1/CST7/ITGB2/IFI35/ITGAM/DOCK2/UNC13D/PTGDS/PYCARD/PTAFR/SPI1/SYK/FES/C5AR1/PRAM1/GRN/PIK3CD/STXBP2/DYSF
GO:0110053	BP	regulation of actin filament organization	187	-0.368688	-1.36967	0.0123839	0.202648	0.181859	2288	tags=32%, list=17%, signal=27%	EPHA1/ARF1/ALMS1/ARPC1A/ARFIP2/CORO1B/CLASP1/PICK1/TRIOBP/MYADM/GSN/S100A10/SSH1/ACTG1/MET/PTK2B/SPTBN4/DBN1/RHOA/EVL/ESAM/VASP/TESK1/ARHGEF18/FHOD1/PFN1/SPTBN1/SSH3/CDC42EP2/CTTN/BIN1/PXN/FLNA/TWF2/HCLS1/CORO1A/HCK/ARPC1B/CDC42EP4/DBNL/PPM1F/GRB2/ADD1/WDR1/COTL1/TMOD1/PAK1/NCKAP1L/PYCARD/SPTAN1/ARPC4/MAGEL2/FLII/CAPZB/CYFIP2/SLC9A1/WAS/SH3BP1/SSH2/WASF2
GO:0046939	BP	nucleotide phosphorylation	79	-0.481546	-1.59662	0.0124378	0.202738	0.18194	1964	tags=35%, list=15%, signal=30%	GIT1/ENO3/TPI1/NCOR1/PGAM1/ENO2/PGAM4/GALK1/NME2/P2RX7/EP300/PFKP/ZBTB20/ZBTB7A/PGM1/ARL2/PNKP/PFKL/OGDH/GAPDH/HK3/ALDOC/FBP1/NME4/ENO1/STAT3/GPI/SLC4A1
GO:1901222	BP	regulation of NIK/NF-kappaB signaling	81	-0.460745	-1.53986	0.0125	0.202738	0.18194	1669	tags=30%, list=12%, signal=26%	EIF2AK2/TRIM44/TRADD/RHOA/IRAK1/EP300/IL18/PTP4A3/RELA/LAPTM5/LGALS9/LITAF/CALR/BCL3/IFI35/RBCK1/TNFSF14/NLRP12/SPI1/NFKBIA/CPNE1/CD14/ADIPOR1/ACTN4
GO:0061387	BP	regulation of extent of cell growth	80	-0.458105	-1.52523	0.0124688	0.202738	0.18194	1438	tags=21%, list=11%, signal=19%	SEMA4B/DBN1/ULK1/SIN3A/CTTN/SRF/DISC1/TWF2/GDI1/ARHGAP4/GSK3B/DBNL/TRPV2/SEMA4D/DSCAM/DNM2/SEMA4A
GO:0045229	BP	external encapsulating structure organization	185	-0.368792	-1.36851	0.0125	0.202738	0.18194	3099	tags=24%, list=23%, signal=19%	COL14A1/MIA/TGFBI/AEBP1/POMT1/ADAM15/HAPLN2/CTSG/COL23A1/RUNX1/COL18A1/SULF2/COLQ/RAMP2/GFOD2/CLASP1/PBXIP1/B4GALT1/ENG/ERCC2/NOXO1/MPV17/EXT1/PLOD3/LCP1/NFKB2/SPOCK2/RIC8A/TGM3/FSCN1/NOTCH1/CST3/PHLDB1/ADAM8/DDR1/TNFRSF1A/TNFRSF1B/BCL3/FURIN/COL8A2/CFLAR/FLOT1/CRISPLD2/MMP9
GO:0051123	BP	RNA polymerase II preinitiation complex assembly	26	0.667733	1.68116	0.0127505	0.203343	0.182483	1425	tags=35%, list=11%, signal=31%	TAF7/DR1/PSMC6/GTF2B/HMGB1/TAF5/CAND1/GTF2A2/TAF2
GO:0032736	BP	positive regulation of interleukin-13 production	12	-0.737236	-1.61735	0.012931	0.203343	0.182483	1332	tags=58%, list=10%, signal=53%	PRKCZ/SPHK2/IL18/HLA-E/LGALS9/RARA/IL17RA
GO:0034109	BP	homotypic cell-cell adhesion	72	-0.495903	-1.60205	0.0129199	0.203343	0.182483	2454	tags=39%, list=18%, signal=32%	PIK3CG/GP6/SH2B3/CEACAM1/JUP/JAK1/CD99/MPL/ACTG1/VCL/TSPAN32/ACTB/EMILIN2/HSPB1/MYL9/FLNA/GNAS/ALOX12/LYN/CSRP1/GATA1/FERMT3/FIBP/PLAUR/SYK/MYH9/MEGF10/TLN1
GO:0005536	MF	glucose binding	11	-0.743124	-1.5969	0.012848	0.203343	0.182483	1665	tags=36%, list=12%, signal=32%	SLC2A8/SLC2A3/HK3/G6PD
GO:0006735	BP	NADH regeneration	11	-0.740167	-1.59055	0.012848	0.203343	0.182483	1708	tags=45%, list=13%, signal=40%	ENO2/PFKP/PFKL/HK3/ENO1
GO:0061621	BP	canonical glycolysis	11	-0.740167	-1.59055	0.012848	0.203343	0.182483	1708	tags=45%, list=13%, signal=40%	ENO2/PFKP/PFKL/HK3/ENO1
GO:0061718	BP	glucose catabolic process to pyruvate	11	-0.740167	-1.59055	0.012848	0.203343	0.182483	1708	tags=45%, list=13%, signal=40%	ENO2/PFKP/PFKL/HK3/ENO1
GO:0004198	MF	calcium-dependent cysteine-type endopeptidase activity	11	-0.740032	-1.59026	0.012848	0.203343	0.182483	479	tags=36%, list=4%, signal=35%	CAPN3/CAPN5/CAPN1/CAPNS1
GO:0099515	BP	actin filament-based transport	16	-0.663255	-1.58585	0.0128205	0.203343	0.182483	441	tags=19%, list=3%, signal=18%	MYO1G/ACTN4/MYO1F
GO:0030050	BP	vesicle transport along actin filament	15	-0.672993	-1.57511	0.0128205	0.203343	0.182483	441	tags=20%, list=3%, signal=19%	MYO1G/ACTN4/MYO1F
GO:0036035	BP	osteoclast development	15	-0.66964	-1.56726	0.0128205	0.203343	0.182483	2307	tags=47%, list=17%, signal=39%	SRC/PAFAH1B1/FBXW7/ANXA2/LTF/TYROBP/ATP6AP1
GO:0032273	BP	positive regulation of protein polymerization	70	-0.478939	-1.54302	0.0128205	0.203343	0.182483	2266	tags=34%, list=17%, signal=29%	HSPA1A/CLASP1/GIT1/NUMA1/MET/PTK2B/RHOA/EVL/VASP/DCTN1/PFN1/CDC42EP2/CTTN/CDK5RAP2/BIN1/PINK1/HCK/CDC42EP4/ARL2/GRB2/PAK1/NCKAP1L/PYCARD/FES
GO:0050768	BP	negative regulation of neurogenesis	89	-0.446964	-1.51959	0.0129534	0.203343	0.182483	2042	tags=24%, list=15%, signal=20%	SIRT2/IL1B/ASCL2/GORASP1/TP53/CTDSP1/SKI/SEMA4B/ULK1/MBP/TRIM11/GDI1/NR1D1/ARHGAP4/CTNNA1/NOTCH1/TSPO/SEMA4D/SEMA4A/RNF10/SORL1
GO:1901990	BP	regulation of mitotic cell cycle phase transition	233	0.402222	1.40267	0.0128755	0.203343	0.182483	2330	tags=26%, list=17%, signal=22%	RPL26/ANXA1/RAB11A/TMEM14B/ZFP36L1/BUB3/RPS27L/VPS4B/CCNG1/NAE1/RIOK2/PLRG1/ANAPC4/PPP2CA/CRLF3/RNASEH2B/SLFN11/CDKN1B/RRM2B/ACVR1/TRIAP1/CCNH/AIF1/NSMCE2/PKD2/SYF2/PTEN/ID2/RB1/PCID2/RPA2/FBXO5/WAC/HECW2/RDX/PKIA/BID/CDC26/USP47/RAD21/TOPBP1/CUL4B/BRCC3/CDC23/MAD2L1BP/BCL2/CDC7/RBL2/KLF4/PSMG2/CDC16/RAD51C/ZFP36L2/PHB2/DDX3X/ANKRD17/RRM1/DONSON/ANAPC7/MNAT1
GO:0005996	BP	monosaccharide metabolic process	194	-0.355841	-1.32187	0.0125786	0.203343	0.182483	2414	tags=30%, list=18%, signal=25%	GALM/SIRT7/PGM5/PMM2/SRC/AKR1A1/SLC37A4/LCMT1/GLYCTK/B4GALT1/TKTL1/GALT/TPI1/MAN2A2/STK11/FUT7/SLC35A2/AKR1B1/FAM3A/OAS1/WDTC1/ENO2/TP53/G6PC3/MAN2C1/PFKFB3/GALK1/PDK3/DDB1/PHKG2/MAN2B2/EP300/PFKFB4/PFKP/ZNF692/DCXR/DYRK2/SLC2A3/PGM1/SLC25A1/GAA/GSK3B/PFKL/GAPDH/BCKDK/HK3/INPPL1/ALDOC/FBP1/PPP1CA/USP7/PGD/MAN2B1/ENO1/GPI/MIDN/ADIPOR1/G6PD
GO:0000463	BP	maturation of LSU-rRNA from tricistronic rRNA transcript (SSU-rRNA, 5.8S rRNA, LSU-rRNA)	11	0.780375	1.62632	0.0130841	0.204351	0.183388	1225	tags=55%, list=9%, signal=50%	RPL7/RPL35/ZNHIT3/DDX18/GTPBP4/WDR12
GO:0045980	BP	negative regulation of nucleotide metabolic process	18	-0.660857	-1.62521	0.0131291	0.204351	0.183388	283	tags=33%, list=2%, signal=33%	GIT1/NCOR1/FBP1/STAT3/CDA/SLC4A1
GO:0060142	BP	regulation of syncytium formation by plasma membrane fusion	19	-0.644885	-1.60767	0.0131004	0.204351	0.183388	1747	tags=47%, list=13%, signal=41%	MYOG/PLEKHO1/CAMK1/TYROBP/IL4R/TNFSF14/EHD1/CFLAR/FLOT1
GO:0030048	BP	actin filament-based movement	88	-0.441132	-1.49492	0.0131234	0.204351	0.183388	1103	tags=18%, list=8%, signal=17%	GJC1/JUP/ATP1A1/GSN/MYBPC3/ACTA2/BIN1/FLNA/MYO1G/SLC9A1/WAS/MYH9/MYO9B/ACTN4/WASF2/MYO1F
GO:0010608	BP	post-transcriptional regulation of gene expression	394	0.356453	1.30576	0.0133156	0.206815	0.185599	2131	tags=25%, list=16%, signal=22%	RPL26/DCP2/EIF3E/RPL5/EIF4A2/CYP1B1/LSM1/ZMPSTE24/ANGEL2/SRP9/RPS6KB1/ZFP36L1/ABCE1/EIF4G2/HNRNPC/XRN1/RPS27L/NCK1/MTPN/SERP1/MRPL13/EIF2A/PAN3/DDX1/TMED2/NGDN/SERBP1/RPS14/LSM14A/METTL5/RGS2/YTHDF3/DPH5/MATR3/KBTBD8/PUM2/ATF4/RPL13A/RPLP1/KHDRBS1/TSNAX/CNOT8/HNRNPA0/UHMK1/PRKRA/UPF3B/NUDT21/TIA1/ZCCHC17/FXR1/DHX36/FASTKD1/CNBP/TIAL1/BANK1/RAN/TDRD7/RPS4X/ROCK1/NCBP2/MAGOH/EXOSC8/RPS9/PCID2/EXOSC…
GO:0035088	BP	establishment or maintenance of apical/basal cell polarity	31	-0.570166	-1.58223	0.0136674	0.210939	0.1893	1547	tags=26%, list=12%, signal=23%	MYO9A/RHOA/FSCN1/SLC9A3R1/MARK2/WDR1/SH3BP1/MSN
GO:0061245	BP	establishment or maintenance of bipolar cell polarity	31	-0.570166	-1.58223	0.0136674	0.210939	0.1893	1547	tags=26%, list=12%, signal=23%	MYO9A/RHOA/FSCN1/SLC9A3R1/MARK2/WDR1/SH3BP1/MSN
GO:0004713	MF	protein tyrosine kinase activity	97	-0.428662	-1.46278	0.0136612	0.210939	0.1893	1930	tags=41%, list=14%, signal=35%	MERTK/EPHA10/TEC/TEC/ERBB2/FGR/PTK6/CAMKK2/EPHB4/EFNA4/MAP2K7/SRC/EPHA1/AATK/JAK1/FGFRL1/FYN/EPHA8/EIF2AK2/MAP2K3/MET/PTK2B/CLK3/TESK1/EPHB6/DYRK1B/DYRK2/SCYL1/TNK2/HIPK2/HCK/LYN/DDR1/CSF1R/TYK2/MAP2K2/CSK/IGF2R/SYK/FES
GO:0031461	CC	cullin-RING ubiquitin ligase complex	124	0.441643	1.44509	0.0137405	0.21162	0.189911	2336	tags=31%, list=17%, signal=26%	RBX1/CRBN/CUL5/KLHL9/KLHDC2/FBXO33/FBXL3/FEM1C/KLHL2/ANAPC13/KBTBD7/KLHL24/KBTBD8/ANAPC4/ANAPC10/SPOPL/CDKN1B/CKS2/RNF7/PDCD6/CAND1/KLHL20/CKS1B/FBXO38/CUL2/CDC26/USP47/CUL4B/SKP2/CDC23/FBXO4/FEM1B/GLMN/CDC16/APPBP2/KLHL8/ANAPC7/KLHL12
GO:0071806	BP	protein transmembrane transport	49	0.546328	1.57408	0.0137694	0.211621	0.189912	2984	tags=45%, list=22%, signal=35%	TOMM7/TRAM1/TOMM20/GRPEL2/TMED10/DNAJC15/SEC61B/DNAJC19/SEC61G/ABCA1/HSPD1/SEC62/TIMM23/PEX1/TOMM22/SRP54/CHCHD4/MCL1/BCR/HSPA5/GRPEL1/PEX7
GO:0032989	BP	cellular component morphogenesis	509	-0.296056	-1.20728	0.0140187	0.215002	0.192946	1862	tags=17%, list=14%, signal=15%	STK11/ROBO3/NDEL1/FYN/B4GALT5/GORASP1/EPHA8/ERCC2/ACTG1/EXT1/MYO9A/VCL/SPTBN4/SEMA4B/NCAM1/DBN1/RHOA/ACTB/HSP90AB1/VASP/KEL/ULK1/MBP/BAX/MYOM2/NRK/EPHB6/TAOK1/ABI3/SIN3A/KIF13B/PACSIN2/LYPLA2/EIF2AK4/CTTN/RNF165/MYL9/FIS1/ADORA2A/TBC1D20/SRF/LLGL1/TAOK2/NEO1/SLITRK1/RAC2/HDAC6/DISC1/TWF2/DVL3/GDI1/BRSK1/BSG/ARHGAP4/NOTCH1/MOV10/GSK3B/DBNL/RAB8A/NUBPL/PHLDB1/FIG4/CSRP1/DDR1/MARK2/WDR1/CFL1/TRPV2/T…
GO:1900024	BP	regulation of substrate adhesion-dependent cell spreading	46	-0.507971	-1.54282	0.0140845	0.215561	0.193447	2833	tags=41%, list=21%, signal=33%	NEDD9/SPRY4/RAC1/PREX1/DOCK5/TRIOBP/RCC2/MYADM/S100A10/CRKL/CRK/TESK1/P4HB/FLNA/DAB2/CALR/UNC13D/DNM2/ACTN4
GO:1901186	BP	positive regulation of ERBB signaling pathway	28	-0.601095	-1.64762	0.0155211	0.219293	0.196796	634	tags=43%, list=5%, signal=41%	ADAM17/PTK6/RBPJ/ADRA2A/FBXW7/NUP62/HIP1/CBL/NCF1/PLAUR/MMP9/SHKBP1
GO:0034695	BP	response to prostaglandin E	20	0.683128	1.62842	0.0146252	0.219293	0.196796	485	tags=20%, list=4%, signal=19%	PTGER4/GNG2/PTGER2/PRKAA1
GO:0019825	MF	oxygen binding	24	-0.613431	-1.61534	0.0154867	0.219293	0.196796	351	tags=36%, list=3%, signal=35%	EGLN2/CBS/HIF1AN/HBD/HBD/HBZ/HBE1/HBM/HBQ1
GO:1903670	BP	regulation of sprouting angiogenesis	25	-0.604319	-1.61112	0.0153846	0.219293	0.196796	2073	tags=40%, list=16%, signal=34%	GHRL/CEACAM1/JAK1/IL10/KLF2/PDPK1/ALOX5/EPN1/ITGA5/E2F2
GO:0008137	MF	NADH dehydrogenase (ubiquinone) activity	28	0.625794	1.61054	0.0145191	0.219293	0.196796	651	tags=25%, list=5%, signal=24%	NDUFA4/NDUFB3/NDUFB2/NDUFS4/NDUFA1/NDUFS5/NDUFB5
GO:0005747	CC	mitochondrial respiratory chain complex I	33	0.601179	1.60892	0.0157068	0.219293	0.196796	651	tags=24%, list=5%, signal=23%	NDUFA4/NDUFB3/NDUFB2/NDUFS4/NDUFA1/NDUFS5/NDUFAB1/NDUFB5
GO:0030964	CC	NADH dehydrogenase complex	33	0.601179	1.60892	0.0157068	0.219293	0.196796	651	tags=24%, list=5%, signal=23%	NDUFA4/NDUFB3/NDUFB2/NDUFS4/NDUFA1/NDUFS5/NDUFAB1/NDUFB5
GO:0045271	CC	respiratory chain complex I	33	0.601179	1.60892	0.0157068	0.219293	0.196796	651	tags=24%, list=5%, signal=23%	NDUFA4/NDUFB3/NDUFB2/NDUFS4/NDUFA1/NDUFS5/NDUFAB1/NDUFB5
GO:0061515	BP	myeloid cell development	60	-0.506458	-1.59884	0.0150754	0.219293	0.196796	1699	tags=40%, list=13%, signal=35%	SRC/PAFAH1B1/SH2B3/FBXW7/ERCC2/PABPC4/ANXA2/LTF/KLF2/TYROBP/EP300/ZBTB7A/SRF/ZFPM1/GATA1/ZNF385A/NCKAP1L/ATP6AP1/TRIM58/EPB42/WASF2/G6PD/SLC4A1/ALAS2
GO:0032616	BP	interleukin-13 production	17	-0.656703	-1.59048	0.0152174	0.219293	0.196796	2331	tags=47%, list=17%, signal=39%	PRKCZ/LILRA5/SPHK2/IL18/HLA-E/LGALS9/RARA/IL17RA
GO:0032656	BP	regulation of interleukin-13 production	17	-0.656703	-1.59048	0.0152174	0.219293	0.196796	2331	tags=47%, list=17%, signal=39%	PRKCZ/LILRA5/SPHK2/IL18/HLA-E/LGALS9/RARA/IL17RA
GO:1902894	BP	negative regulation of miRNA transcription	17	-0.656621	-1.59028	0.0152174	0.219293	0.196796	2839	tags=41%, list=21%, signal=32%	PPARD/LILRB4/NFIB/YY1/SRF/RELA/RARA
GO:0010257	BP	NADH dehydrogenase complex assembly	36	0.582057	1.58693	0.0153846	0.219293	0.196796	651	tags=25%, list=5%, signal=24%	NDUFB3/TMEM126B/NDUFB2/NDUFS4/NDUFA1/NDUFS5/TMEM126A/NDUFAB1/NDUFB5
GO:0032981	BP	mitochondrial respiratory chain complex I assembly	36	0.582057	1.58693	0.0153846	0.219293	0.196796	651	tags=25%, list=5%, signal=24%	NDUFB3/TMEM126B/NDUFB2/NDUFS4/NDUFA1/NDUFS5/TMEM126A/NDUFAB1/NDUFB5
GO:0016500	MF	protein-hormone receptor activity	10	-0.750541	-1.58148	0.0147059	0.219293	0.196796	1468	tags=20%, list=11%, signal=18%	ADIPOR2/ADIPOR1
GO:0006367	BP	transcription initiation from RNA polymerase II promoter	66	0.517758	1.57686	0.0146819	0.219293	0.196796	1425	tags=32%, list=11%, signal=29%	TAF7/DR1/SUB1/PSMC6/E2F3/GTF2F2/MED4/GTF2E1/GTF2B/ZNF451/MED30/GTF2E2/HMGB1/CCNH/DHX36/TAF5/GTF2H5/CAND1/PPM1D/GTF2A2/TAF2
GO:0071294	BP	cellular response to zinc ion	16	-0.659439	-1.57672	0.0149573	0.219293	0.196796	3671	tags=69%, list=27%, signal=50%	CREB1/KCNK3/HVCN1/MT1F/P2RX4/MT1X/ATP13A2/MT1A/TSPO/MT2A/MTF1
GO:0035809	BP	regulation of urine volume	17	-0.650829	-1.57625	0.0152174	0.219293	0.196796	2672	tags=47%, list=20%, signal=38%	NPR1/OPRL1/MLLT6/AVPR2/AKR1B1/ADORA2A/GNAI2/SLC4A1
GO:0046031	BP	ADP metabolic process	74	-0.475983	-1.56402	0.0145985	0.219293	0.196796	1964	tags=34%, list=15%, signal=29%	GIT1/ENO3/TPI1/NCOR1/PGAM1/ENO2/PGAM4/GALK1/P2RX7/EP300/PFKP/ZBTB20/ZBTB7A/PGM1/ARL2/PFKL/OGDH/GAPDH/HK3/ALDOC/FBP1/ENO1/STAT3/GPI/SLC4A1
GO:0002713	BP	negative regulation of B cell mediated immunity	14	0.713359	1.56279	0.0149813	0.219293	0.196796	1401	tags=29%, list=10%, signal=26%	CD46/CD55/NDFIP1/THOC1
GO:0002890	BP	negative regulation of immunoglobulin mediated immune response	14	0.713359	1.56279	0.0149813	0.219293	0.196796	1401	tags=29%, list=10%, signal=26%	CD46/CD55/NDFIP1/THOC1
GO:0006165	BP	nucleoside diphosphate phosphorylation	78	-0.472632	-1.56204	0.0151515	0.219293	0.196796	1964	tags=35%, list=15%, signal=30%	GIT1/ENO3/TPI1/NCOR1/PGAM1/ENO2/PGAM4/GALK1/NME2/P2RX7/EP300/PFKP/ZBTB20/ZBTB7A/PGM1/ARL2/PFKL/OGDH/GAPDH/HK3/ALDOC/FBP1/NME4/ENO1/STAT3/GPI/SLC4A1
GO:2000142	BP	regulation of DNA-templated transcription, initiation	48	0.543338	1.55365	0.0157343	0.219293	0.196796	1425	tags=29%, list=11%, signal=26%	TAF7/SUB1/PSMC6/MED4/ZNF451/MED30/RRN3/HMGB1/DHX36/TAF5/CAND1/PPM1D/GTF2A2/TAF2
GO:0002444	BP	myeloid leukocyte mediated immunity	86	-0.455124	-1.5369	0.0155039	0.219293	0.196796	1346	tags=33%, list=10%, signal=29%	CD300A/PDPK1/SPHK2/STX4/TYROBP/IL4R/TICAM1/HLA-E/LAT/RAC2/FCGR3A/LYN/CBL/LGALS9/VAMP2/WDR1/GATA1/ITGB2/ITGAM/UNC13D/PTGDS/PTAFR/SPI1/SYK/FES/PRAM1/PIK3CD/STXBP2
GO:0033108	BP	mitochondrial respiratory chain complex assembly	51	0.527607	1.53321	0.0152542	0.219293	0.196796	696	tags=24%, list=5%, signal=22%	NDUFB3/TMEM126B/NDUFB2/NDUFS4/NDUFA1/NDUFS5/TMEM126A/TFAM/NDUFAB1/COX17/NDUFB5/OMA1
GO:0072676	BP	lymphocyte migration	84	-0.448992	-1.5101	0.0153846	0.219293	0.196796	2557	tags=33%, list=19%, signal=27%	TNFRSF14/RIPK3/ICAM1/PIK3CG/CCL23/IL27RA/ARTN/FUT7/CD99/EXT1/PTK2B/CRKL/RHOA/CRK/CD99L2/PADI2/CXCL16/ADAM8/ITGB7/MYO1G/TNFSF14/PYCARD/STK10/ITGAL/GBA/WNK1/MSN/PIK3CD
GO:0030018	CC	Z disc	82	-0.446417	-1.49553	0.0151134	0.219293	0.196796	2407	tags=24%, list=18%, signal=20%	PARVB/PGM5/ATP2B4/JUP/STK11/FHL2/STUB1/HSPB1/MYL9/BIN1/FLNA/PDLIM1/CSRP1/PAK1/FKBP1A/FHL3/PDLIM7/ACTN4/SLC4A1/ACTN1
GO:0051961	BP	negative regulation of nervous system development	93	-0.436676	-1.49321	0.0156658	0.219293	0.196796	2042	tags=23%, list=15%, signal=19%	SIRT2/IL1B/ASCL2/GORASP1/TP53/CTDSP1/SKI/SEMA4B/ULK1/MBP/TRIM11/GDI1/NR1D1/ARHGAP4/CTNNA1/NOTCH1/TSPO/SEMA4D/SEMA4A/RNF10/SORL1
GO:0010811	BP	positive regulation of cell-substrate adhesion	93	-0.432863	-1.48017	0.0156658	0.219293	0.196796	2389	tags=28%, list=18%, signal=23%	PREX1/DOCK5/PRKCZ/EPHA1/JUP/TRIOBP/MYADM/S100A10/PTK2B/CRKL/CRK/TESK1/RRAS/SPOCK2/P4HB/FLNA/DISC1/DAB2/GSK3B/ARL2/PPM1F/CALR/UNC13D/CD3E/ITGA5/DNM2
GO:0036464	CC	cytoplasmic ribonucleoprotein granule	178	0.413662	1.40734	0.0146843	0.219293	0.196796	1416	tags=21%, list=11%, signal=19%	MBNL1/SNRPG/DCP2/PSMA6/LSM3/LSM1/PSMA4/RPS6/ZFP36L1/XRN1/PSMC2/RPL6/G3BP2/PNRC2/PAN3/PSMA2/ZFAND1/DDX1/LSM14A/YTHDF3/SNRPB2/PUM2/NFKBIZ/RPLP0/CNOT8/UHMK1/G3BP1/TIA1/FXR1/DHX36/TIAL1/IQGAP1/TDRD7/RPS4X/ROCK1/STAU2/C9orf72/KPNB1
GO:0030100	BP	regulation of endocytosis	157	-0.383066	-1.39374	0.015625	0.219293	0.196796	2046	tags=29%, list=15%, signal=25%	PICK1/NECAB2/CD151/RAB5C/ARFGAP1/EHD4/ABCA7/WDR54/SMPD1/ANXA2/LRPAP1/ARRB1/AP2B1/ARRB2/UNC119/CD300A/AP2S1/CD63/PACSIN2/LDLRAP1/CLN3/SNX17/RAB4B/PTPN1/BIN1/ATXN2/TNK2/DAB2/PLCG2/TSC2/CALM3/HIP1/SNCA/CBL/RAB5B/NCKAP1L/AAK1/RIN3/NR1H2/SYK/VPS28/FLOT1/DNM2/CD14/AP2M1
GO:0002685	BP	regulation of leukocyte migration	166	-0.371153	-1.36733	0.0149701	0.219293	0.196796	2557	tags=30%, list=19%, signal=24%	TNFRSF14/RIPK3/ICAM1/JAM3/P2RX4/MOSPD2/ZP3/ST3GAL4/ZNF580/AGER/IL27RA/PLVAP/FUT7/MYD88/CD99/HMOX1/TIRAP/PTK2B/CRKL/RHOA/CRK/CD300A/BDKRB1/CD99L2/PADI2/IL6R/ADA/CD74/RAC2/DAPK2/LYN/ADAM8/LGALS9/CALR/CSF1R/NCKAP1L/GPSM3/TNFSF14/PYCARD/RIN3/STK10/PTAFR/SPI1/C5AR1/WNK1/MAPK3/MSN/RHOG/MPP1
GO:0045088	BP	regulation of innate immune response	182	-0.367979	-1.36696	0.015625	0.219293	0.196796	1981	tags=32%, list=15%, signal=28%	SLC15A4/HLA-F/VSIG4/FYN/FAM3A/STAT2/OAS1/LAG3/TIRAP/SERPING1/IRF1/RBM14/LILRA2/AP1G1/HSP90AB1/ARRB2/CRK/TYROBP/IKBKB/EP300/PARP14/TRIM41/CDC37/HLA-E/SIN3A/ZBP1/PTPN1/STAT5B/TTLL12/NLRX1/TRAFD1/HLA-B/NCR3/PLCG2/FCN1/HCK/IKBKE/CREBBP/VAV1/LYN/ADAM8/LGALS9/HLA-A/IFI35/TRIM21/PAK1/ADAR/KIR2DL4/PYCARD/XRCC6/NCF1/LAMP1/NR1H2/ZNFX1/SPI1/SYK/GRN/IRF3
GO:0016051	BP	carbohydrate biosynthetic process	143	-0.381161	-1.36081	0.0153846	0.219293	0.196796	2303	tags=29%, list=17%, signal=24%	AKR1A1/NDST2/SLC37A4/MPDU1/ST3GAL4/B4GALT1/CHST12/TPI1/STK11/FUT7/B4GALT5/AKR1B1/FAM3A/ENO2/B3GALT4/G6PC3/EXT1/PTK2B/DDB1/PHKG2/AP2A1/EP300/ST3GAL2/ZNF692/DYRK2/PGM1/SLC25A1/ST6GALNAC6/NFKB1/NR1D1/GSK3B/SNCA/NDST1/FBP1/PPP1CA/IMPA2/PTAFR/USP7/PGD/GPI/G6PD
GO:0008380	BP	RNA splicing	281	0.381089	1.35964	0.0151515	0.219293	0.196796	2014	tags=30%, list=15%, signal=26%	MBNL1/SNRPG/SLC38A2/LSM3/RBM25/LSM1/CLK4/CLNS1A/HNRNPC/DHX15/LSM5/PSIP1/THOC7/RBM12B/SLU7/RBM15/CDC40/SMNDC1/FRG1/DDX1/PLRG1/LSM7/HSPA8/PNN/RPS13/PPWD1/LARP7/STRAP/WBP4/SNRPB2/CWF19L2/PPP2CA/RBM17/PTBP2/KHDRBS1/SNRPF/CDC5L/PRPF38B/RNPC3/DDX46/GRSF1/PRPF4B/LGALS3/RBM7/TIA1/FXR1/METTL4/CWC15/PPIG/ZRANB2/SYF2/CLK1/NCBP2/MAGOH/PRPF18/MBNL2/C9orf78/DDX5/PPIL1/THOC1/TTF2/GEMIN6/RSRC1/DYRK1A/COIL/SNRPD2…
GO:0030658	CC	transport vesicle membrane	149	-0.378158	-1.35744	0.0154321	0.219293	0.196796	1474	tags=20%, list=11%, signal=18%	ICA1/AP1G1/AP2A1/RAB35/DNAJC5/STX5/HLA-E/PEF1/HLA-C/BIN1/CD74/AP1G2/SLC30A3/HLA-B/CALM3/TPRG1L/SNCA/SEC24C/RAB5B/HLA-A/STX10/VAMP2/SCAP/SEC16A/CA4/BCL2L1/HLA-DRB1/SORL1/HLA-DRB5/NRGN
GO:0051495	BP	positive regulation of cytoskeleton organization	136	-0.380773	-1.35645	0.0153374	0.219293	0.196796	1804	tags=26%, list=13%, signal=22%	GSN/NUMA1/S100A10/MET/PTK2B/NUP62/RHOA/EVL/VASP/TESK1/P2RX7/FHOD1/DCTN1/KATNB1/PFN1/CDC42EP2/CTTN/CDK5RAP2/BIN1/PXN/HCLS1/DYNC1H1/HCK/CDC42EP4/ARL2/PPM1F/GRB2/WDR1/PAK1/NCKAP1L/PYCARD/MAGEL2/FES/WAS/WASF2
GO:0030198	BP	extracellular matrix organization	182	-0.364041	-1.35233	0.015625	0.219293	0.196796	3099	tags=24%, list=23%, signal=18%	COL14A1/MIA/TGFBI/AEBP1/POMT1/ADAM15/HAPLN2/CTSG/COL23A1/RUNX1/COL18A1/SULF2/COLQ/RAMP2/GFOD2/CLASP1/PBXIP1/B4GALT1/ENG/ERCC2/NOXO1/MPV17/EXT1/PLOD3/LCP1/NFKB2/SPOCK2/RIC8A/FSCN1/NOTCH1/CST3/PHLDB1/ADAM8/DDR1/TNFRSF1A/TNFRSF1B/BCL3/FURIN/COL8A2/CFLAR/FLOT1/CRISPLD2/MMP9
GO:0043062	BP	extracellular structure organization	182	-0.364041	-1.35233	0.015625	0.219293	0.196796	3099	tags=24%, list=23%, signal=18%	COL14A1/MIA/TGFBI/AEBP1/POMT1/ADAM15/HAPLN2/CTSG/COL23A1/RUNX1/COL18A1/SULF2/COLQ/RAMP2/GFOD2/CLASP1/PBXIP1/B4GALT1/ENG/ERCC2/NOXO1/MPV17/EXT1/PLOD3/LCP1/NFKB2/SPOCK2/RIC8A/FSCN1/NOTCH1/CST3/PHLDB1/ADAM8/DDR1/TNFRSF1A/TNFRSF1B/BCL3/FURIN/COL8A2/CFLAR/FLOT1/CRISPLD2/MMP9
GO:0043547	BP	positive regulation of GTPase activity	184	-0.361285	-1.34028	0.015674	0.219293	0.196796	2588	tags=30%, list=19%, signal=25%	TBC1D22A/PREX1/TIAM2/AGRN/RASGRP4/SIPA1L1/TBC1D13/EPHA1/CCL23/SGSM2/TBC1D14/SGSM3/RCC2/TBC1D16/NDEL1/TBC1D2/S100A10/RGS14/RGL2/RGMA/MYO9A/TBC1D22B/PTK2B/CRKL/CRK/RAPGEF1/TGM2/TBC1D3G/RASGRP2/RALBP1/TBC1D17/RGL4/TBC1D20/TBC1D2B/RANGAP1/BIN1/RALGDS/RAPGEF6/DVL3/TBC1D25/TBC1D10C/TSC2/IQSEC1/GSK3B/VAV1/SIPA1/TAX1BP3/SIPA1L3/EVI5/RABGAP1/SEMA4D/GMIP/RAP1GAP/SH3BP1/RHOG/TBC1D10B
GO:0019318	BP	hexose metabolic process	179	-0.359804	-1.33485	0.0154321	0.219293	0.196796	2839	tags=35%, list=21%, signal=28%	PPARD/ALDOA/DGAT2/CRTC2/GLB1/GHRL/PASK/ACACB/GALM/SIRT7/PGM5/PMM2/SRC/SLC37A4/LCMT1/GLYCTK/B4GALT1/TKTL1/GALT/TPI1/MAN2A2/STK11/FUT7/SLC35A2/AKR1B1/FAM3A/OAS1/WDTC1/ENO2/TP53/G6PC3/MAN2C1/PFKFB3/GALK1/PDK3/DDB1/PHKG2/MAN2B2/EP300/PFKFB4/PFKP/ZNF692/DCXR/DYRK2/PGM1/SLC25A1/GAA/GSK3B/PFKL/GAPDH/BCKDK/HK3/INPPL1/ALDOC/FBP1/PPP1CA/USP7/MAN2B1/ENO1/GPI/MIDN/ADIPOR1/G6PD
GO:0051701	BP	biological process involved in interaction with host	149	-0.369779	-1.32737	0.0154321	0.219293	0.196796	1832	tags=26%, list=14%, signal=22%	ITGB5/VPS4A/GSN/IFITM3/SMPD1/NCAM1/DDB1/SLC1A5/TRIM8/TRIM11/CHMP4B/P4HB/CD74/FCN1/TRIM38/BSG/IFITM2/VPS18/CD4/THOC5/TRIM25/LY6E/SELPLG/CBL/LGALS9/CHMP1A/ITGB7/TRIM21/ATG7/LAMP1/TRIM26/ITGA5/VPS37B/PGLYRP1/CTSB/ANPEP/BCL2L1/HLA-DRB1
GO:1901215	BP	negative regulation of neuron death	149	-0.368899	-1.32421	0.0154321	0.219293	0.196796	2099	tags=25%, list=16%, signal=21%	IL27RA/EIF4G1/SULT1A3/MAP3K12/BTG2/HLA-F/ATP13A2/IL10/ENO2/HMOX1/PTK2B/RHOA/AP2B1/HSP90AB1/ARRB2/BAX/DNAJC5/BOK/CHMP4B/CLN3/IKBKG/ADORA2A/PINK1/HIPK2/CORO1A/GSK3B/SNCA/ADAM8/CBL/TNFRSF1B/KIR3DL2/HDGF/GBA/GPI/GRN/BCL2L1/SORL1
GO:0022411	BP	cellular component disassembly	336	-0.331138	-1.29976	0.0147059	0.219293	0.196796	2263	tags=31%, list=17%, signal=26%	PAFAH1B1/TEX264/ARID1A/ARFIP2/VDAC1/FBXW7/CLASP1/GABARAPL1/LRBA/PBXIP1/UBQLN4/DFFA/TRIOBP/CHMP2A/MTRF1L/USP36/MAP1LC3A/CALM1/NDEL1/VPS4A/PPP1R9B/GSN/MICAL2/ATP13A2/MID1IP1/TP53/NOXO1/SPTBN4/GRWD1/DUSP3/APEH/ULK1/BAX/DCTN1/STX5/GOLGA2/CDC37/BOK/CLEC16A/TAOK1/KATNB1/LCP1/CHMP4B/SPTBN1/CLN3/CTTN/GBF1/AKAP8L/FIS1/SMARCA4/EIF5A/HDAC6/ACIN1/PINK1/FSCN1/TWF2/WDR45/FRAT1/SMARCC2/TBC1D25/SMARCB1/GSPT1/TSC…
GO:2000112	BP	regulation of cellular macromolecule biosynthetic process	362	0.35712	1.29409	0.0151307	0.219293	0.196796	2131	tags=25%, list=16%, signal=21%	RPL26/DCP2/EIF3E/RPL5/EIF4A2/RB1CC1/CYP1B1/LSM1/SRP9/RPS6KB1/ZFP36L1/ABCE1/EIF4G2/XRN1/TMEM59/RPS27L/NCK1/MTPN/SERP1/ABCB10/ITM2A/MRPL13/EIF2A/PAN3/DDX1/TM9SF2/TMED2/NGDN/RPS14/LSM14A/METTL5/RGS2/PPP1CB/YTHDF3/DPH5/KBTBD8/DBI/PUM2/ATF4/RPL13A/RPLP1/KHDRBS1/CNOT8/UHMK1/UPF3B/TIA1/FXR1/DHX36/ARFGEF1/CNBP/BANK1/RPS4X/ROCK1/NCBP2/MAGOH/EXOSC8/RPS9/EXOSC3/CNOT6/RPL22/MTIF2/RPS6KA3/BZW2/DPH3/METAP1/EPM…
GO:0046649	BP	lymphocyte activation	585	-0.29977	-1.23446	0.0148515	0.219293	0.196796	2574	tags=30%, list=19%, signal=25%	MAD2L2/CD22/CD27/TNFRSF14/PREX1/GON4L/RIPK3/PLA2G2D/CEBPB/DDOST/ICAM1/BAK1/LAT2/PIK3CG/CBLB/NLRP3/IGLL1/LAX1/ZBTB7B/FBXO7/HLA-DRB3/PRKCZ/SRC/ZP3/KLF6/EOMES/IKZF3/AGER/IL27RA/LFNG/SOX13/CEACAM1/HLA-DRB4/CD151/LILRB2/NCAPH2/SLC15A4/IL1B/MAD1L1/HLA-F/ZNF683/NFKBID/STK11/VSIG4/CMTM7/FUT7/MICB/CARD11/ZMIZ1/MYD88/FYN/CD6/GSN/CD320/IL10/CD5/MPL/TP53/NFAM1/CD84/KDELR1/LAG3/SH3KBP1/SIRPB1/TIRAP/IL2RB/IRF1…
GO:0009725	BP	response to hormone	612	-0.296032	-1.22468	0.0153846	0.219293	0.196796	2113	tags=21%, list=16%, signal=19%	PTPRA/UBE2L3/CYP11A1/CEACAM1/HADHA/FGF23/TRERF1/NCOA6/ATP1A1/BTG2/IL1B/ENG/CASP9/NCOR1/STK11/PRMT2/JAK1/FUT7/CRY2/FHL2/NDEL1/ZMIZ1/PPP1R9B/CITED4/EIF2B4/ASH2L/STAT2/IL10/EPHA8/WDTC1/USF1/SLC2A8/HMOX1/EIF4EBP2/LEPROT/ATP1A3/CYBA/RBM14/ADIPOR2/PTK2B/RHOA/CRK/PDPK1/NCOR2/IL4R/RXRB/EP300/MBP/SLC27A1/PELP1/APRT/PADI2/CCND3/PTPRE/YY1/ZBTB7A/RNF40/CALCOCO1/PTPN1/STAT5B/SMARCA4/SH2B2/SRF/RANGAP1/HDAC1/PX…
GO:0051084	BP	'de novo' post-translational protein folding	30	0.623271	1.64598	0.015873	0.219387	0.196881	695	tags=27%, list=5%, signal=25%	PTGES3/HSPE1/HSPH1/CCT2/ST13/HSPA8/DNAJB14/HSPA14
GO:0003954	MF	NADH dehydrogenase activity	30	0.619442	1.63588	0.015873	0.219387	0.196881	651	tags=23%, list=5%, signal=22%	NDUFA4/NDUFB3/NDUFB2/NDUFS4/NDUFA1/NDUFS5/NDUFB5
GO:0050136	MF	NADH dehydrogenase (quinone) activity	29	0.622639	1.62106	0.0160714	0.219387	0.196881	651	tags=24%, list=5%, signal=23%	NDUFA4/NDUFB3/NDUFB2/NDUFS4/NDUFA1/NDUFS5/NDUFB5
GO:1903053	BP	regulation of extracellular matrix organization	30	-0.581711	-1.59898	0.016092	0.219387	0.196881	799	tags=27%, list=6%, signal=25%	FSCN1/NOTCH1/CST3/PHLDB1/DDR1/TNFRSF1A/TNFRSF1B/CFLAR
GO:0031571	BP	mitotic G1 DNA damage checkpoint signaling	23	0.647541	1.59058	0.0161002	0.219387	0.196881	1398	tags=26%, list=10%, signal=23%	RPL26/RPS27L/CDKN1B/TRIAP1/RPA2/WAC
GO:0044819	BP	mitotic G1/S transition checkpoint signaling	23	0.647541	1.59058	0.0161002	0.219387	0.196881	1398	tags=26%, list=10%, signal=23%	RPL26/RPS27L/CDKN1B/TRIAP1/RPA2/WAC
GO:0002862	BP	negative regulation of inflammatory response to antigenic stimulus	22	-0.61966	-1.58128	0.0158014	0.219387	0.196881	2375	tags=50%, list=18%, signal=41%	RHBDF2/SRC/FYN/IL10/PLCG1/HCK/LYN/FURIN/SYK/GPX1/HLA-DRB1
GO:0010677	BP	negative regulation of cellular carbohydrate metabolic process	30	-0.565565	-1.5546	0.016092	0.219387	0.196881	1964	tags=30%, list=15%, signal=26%	GIT1/NCOR1/FAM3A/EP300/GSK3B/FBP1/STAT3/MIDN/SLC4A1
GO:0001764	BP	neuron migration	99	-0.410548	-1.40694	0.0160428	0.219387	0.196881	2263	tags=24%, list=17%, signal=20%	PLXNB2/DCLK1/NRG3/DDIT4/RAC1/CDK5/PAFAH1B1/TUBB2A/FBXO31/NDEL1/ZMIZ1/FYN/ELP3/CRKL/CRK/BAX/SRF/NEO1/DISC1/TUBGCP2/MARK2/ARHGEF2/NDE1/STAT3
GO:0015291	MF	secondary active transmembrane transporter activity	156	-0.371897	-1.34504	0.0159744	0.219387	0.196881	3244	tags=28%, list=24%, signal=21%	SLC6A7/SLC25A3/SLC6A9/SLC46A1/SLC38A1/SLC5A3/SLC5A8/SLC1A7/SLC9A3/LETM1/SLC5A9/SLC9A2/SLC6A12/SLC37A4/SLC16A12/SLC6A16/SLC15A4/SLC25A11/SLC35C1/SLC13A3/SLC4A2/ATP1A3/SLC45A4/SLC5A6/SLC9A8/SLC1A5/SLC12A9/SLC6A6/SLC26A6/SLC25A1/SLC16A5/SLC7A5/SLC35C2/SLC10A3/SLC35E1/CLCN7/SLC16A3/SLCO3A1/SLC19A1/SLC9A1/SLC15A3/SLC6A8/SLC4A1
GO:0048588	BP	developmental cell growth	156	-0.371343	-1.34303	0.0159744	0.219387	0.196881	1862	tags=20%, list=14%, signal=17%	STK11/PRMT2/NDEL1/EXT1/VCL/SEMA4B/CTDP1/DBN1/HSP90AB1/ULK1/SIN3A/YY1/EIF2AK4/CTTN/SRF/HDAC6/DISC1/TWF2/GDI1/ARHGAP4/GSK3B/DBNL/DDR1/TRPV2/SEMA4D/DSCAM/CYFIP2/CPNE1/DNM2/SEMA4A/G6PD
GO:0030522	BP	intracellular receptor signaling pathway	200	-0.352243	-1.31272	0.0158228	0.219387	0.196881	2307	tags=28%, list=17%, signal=24%	SRC/ALPK1/DHRS3/HSPA1A/EGLN2/ARID1A/CLOCK/GPATCH3/TRERF1/SLC15A4/ASXL1/NCOR1/PRMT2/CRY2/ZMIZ1/KLF2/PDK3/CRKL/RHOA/NCOR2/RXRB/EP300/PADI2/OASL/FAM120B/ASXL2/ZBTB7A/CALCOCO1/NLRX1/SMARCA4/HDAC1/SAFB/RELA/HDAC6/AHR/DAB2/SAFB2/NR1D1/VPS18/DAXX/PIM1/NPLOC4/CALR/PAK1/WBP2/NR1H2/RXRA/NFKBIA/RARA/SLC15A3/STAT3/GPS2/SEC14L1/IRF3/ACTN4/CARM1
GO:0042110	BP	T cell activation	416	-0.317225	-1.27286	0.0161943	0.220261	0.197665	2122	tags=26%, list=16%, signal=23%	AGER/IL27RA/LFNG/SOX13/CEACAM1/HLA-DRB4/CD151/LILRB2/NCAPH2/IL1B/MAD1L1/ZNF683/NFKBID/STK11/VSIG4/FUT7/MICB/CARD11/ZMIZ1/FYN/CD6/GSN/IL10/CD5/TP53/CD84/KDELR1/LAG3/SIRPB1/IRF1/FCER1G/RELB/RHOA/AP3D1/DUSP3/CD300A/DHPS/P2RX7/IL4R/IL18/BAX/PKNOX1/SOX12/HLA-E/CCND3/LCP1/TCIRG1/KIF13B/LAT/HLA-DMA/EIF2AK4/FZD7/CD7/STAT5B/IL6R/ADORA2A/PRELID1/SRF/ADA/NCSTN/CD74/RAC2/NKG7/CORO1A/STAT6/ZFPM1/CD4/CCDC88B/V…
GO:0043292	CC	contractile fiber	153	-0.374557	-1.34593	0.0162338	0.220388	0.19778	2407	tags=25%, list=18%, signal=21%	PARVB/PGM5/ARF1/TPM4/ATP2B4/LMAN1/JUP/STK11/CALM1/FHL2/MYBPC3/ACTG1/STUB1/VCL/HSPB1/MYOM2/MYL4/ACTA2/SPTBN1/MYL9/BIN1/FLNA/TWF2/CALM3/PDLIM1/CSRP1/TMOD1/SCO2/PAK1/SQSTM1/FKBP1A/FHL3/CAPZB/ENO1/PDLIM7/ACTN4/SLC4A1/ACTN1
GO:0004714	MF	transmembrane receptor protein tyrosine kinase activity	34	-0.566527	-1.60054	0.016317	0.220724	0.198081	3783	tags=44%, list=28%, signal=32%	EGFR/EPHB2/MERTK/EPHA10/ERBB2/EPHB4/EFNA4/EPHA1/FGFRL1/EPHA8/MET/EPHB6/DDR1/CSF1R/IGF2R
GO:0008360	BP	regulation of cell shape	108	-0.426047	-1.48237	0.0163488	0.220724	0.198081	1627	tags=28%, list=12%, signal=25%	SH3KBP1/EPB41/PTK2B/RHOA/CRK/ARHGEF18/RHOF/GNA12/CDC42EP2/TAOK2/RAC2/LST1/CORO1A/HCK/CDC42EP4/FGD3/SLC9A3R1/MARK2/WDR1/ITGB2/FMNL1/CSF1R/SEMA4D/FES/MYH9/DIAPH1/MSN/RHOG/EPB42/SEMA4A
GO:0031253	CC	cell projection membrane	230	-0.352905	-1.33699	0.0163399	0.220724	0.198081	1637	tags=18%, list=12%, signal=16%	SPATA13/TIRAP/SYTL1/MFSD10/SLC5A6/RHOA/HSP90AB1/VASP/STX4/SLC6A6/PLEK2/SLC26A6/RAB35/RASGRP2/GNA12/ROM1/LCP1/PACSIN2/PLCG1/SPTBN1/ADORA2A/SLC7A5/FSCN1/PLCG2/TBC1D10C/PSD4/SLC9A3R1/ARHGEF2/CFL1/PAK1/SLC19A1/EHD1/PIP5K1C/ITGA5/GPI/CA4/DIAPH1/MSN/DNM2/TESC/TLN1
GO:0046501	BP	protoporphyrinogen IX metabolic process	10	-0.743423	-1.56649	0.0168067	0.221738	0.198991	2196	tags=50%, list=16%, signal=42%	UROD/FECH/UROS/EIF2AK1/ALAS2
GO:0032373	BP	positive regulation of sterol transport	10	-0.740962	-1.5613	0.0168067	0.221738	0.198991	1521	tags=30%, list=11%, signal=27%	ANXA2/LDLRAP1/NR1H2
GO:0032376	BP	positive regulation of cholesterol transport	10	-0.740962	-1.5613	0.0168067	0.221738	0.198991	1521	tags=30%, list=11%, signal=27%	ANXA2/LDLRAP1/NR1H2
GO:1902514	BP	regulation of calcium ion transmembrane transport via high voltage-gated calcium channel	10	-0.738688	-1.55651	0.0168067	0.221738	0.198991	1598	tags=30%, list=12%, signal=26%	CACNG6/BIN1/G6PD
GO:0035987	BP	endodermal cell differentiation	32	-0.559554	-1.54981	0.0164706	0.221738	0.198991	455	tags=16%, list=3%, signal=15%	ITGB2/PAF1/ITGA5/RTF1/MMP9
GO:0045058	BP	T cell selection	42	-0.520251	-1.54641	0.0165094	0.221738	0.198991	1862	tags=33%, list=14%, signal=29%	STK11/CARD11/RHOA/IL6R/SRF/CD74/STAT6/ZFPM1/CD4/DOCK2/CD3E/ITPKB/SYK/STAT3
GO:0097048	BP	dendritic cell apoptotic process	10	-0.733807	-1.54622	0.0168067	0.221738	0.198991	600	tags=30%, list=4%, signal=29%	GAS6/LYN/LGALS9
GO:2000668	BP	regulation of dendritic cell apoptotic process	10	-0.733807	-1.54622	0.0168067	0.221738	0.198991	600	tags=30%, list=4%, signal=29%	GAS6/LYN/LGALS9
GO:0042749	BP	regulation of circadian sleep/wake cycle	10	-0.733558	-1.5457	0.0168067	0.221738	0.198991	968	tags=40%, list=7%, signal=37%	GHRL/ADORA2A/NR1D1/PTGDS
GO:0000244	BP	spliceosomal tri-snRNP complex assembly	10	-0.732588	-1.54366	0.0168067	0.221738	0.198991	2385	tags=60%, list=18%, signal=49%	CD2BP2/USP4/PRPF31/PRPF3/PRPF19/PRPF8
GO:0010721	BP	negative regulation of cell development	114	-0.421445	-1.46513	0.0168539	0.221738	0.198991	2042	tags=23%, list=15%, signal=19%	FBXW7/SIRT2/IL1B/RCC2/ASCL2/GORASP1/TP53/CTDSP1/SKI/LTF/SEMA4B/ULK1/MBP/TRIM11/GDI1/NR1D1/ARHGAP4/CTNNA1/NOTCH1/GSK3B/TSPO/SEMA4D/ACTN4/SEMA4A/RNF10/SORL1
GO:0060326	BP	cell chemotaxis	221	-0.36844	-1.3846	0.0165563	0.221738	0.198991	1611	tags=20%, list=12%, signal=18%	TIRAP/CXCL14/MET/FCER1G/PTK2B/CRKL/ARRB2/CRK/HSPB1/PADI2/ALOX5/GBF1/IL6R/CXCL16/CD74/RAC2/DAPK2/CORO1A/BSG/NOTCH1/VAV1/LYN/NINJ1/ADAM8/LGALS9/CALR/ITGB2/CSF1R/NCKAP1L/GPSM3/TNFSF14/PRKD2/RIN3/PIP5K1C/SPI1/SYK/C5AR1/WNK1/MAPK3/RHOG/PIK3CD/MPP1/CSF3R/IL17RA
GO:0002694	BP	regulation of leukocyte activation	437	-0.306934	-1.23541	0.0168776	0.221738	0.198991	2574	tags=30%, list=19%, signal=25%	MAD2L2/CD22/CD27/TNFRSF14/RIPK3/PLA2G2D/CEBPB/CBLB/NLRP3/IGLL1/LAX1/CD33/ZBTB7B/FBXO7/HLA-DRB3/PRKCZ/SRC/ZP3/SHPK/IKZF3/AGER/IL27RA/SOX13/CEACAM1/GAB2/HLA-DRB4/LILRB2/SLC15A4/IL1B/MAD1L1/HLA-F/ZNF683/NFKBID/VSIG4/CARD11/ZMIZ1/MYD88/FYN/CD6/MFHAS1/CRLF2/CD320/IL10/CD5/MPL/NFAM1/CD84/HMOX1/LAG3/SH3KBP1/SIRPB1/TIRAP/CD300LF/IRF1/AP1G1/CEBPA/RHOA/TSPAN32/AP3D1/DUSP3/CDKN1A/CD300A/PDPK1/DHPS/SPHK2/STX…
GO:0044087	BP	regulation of cellular component biogenesis	659	-0.290451	-1.19862	0.0168539	0.221738	0.198991	2020	tags=22%, list=15%, signal=19%	EIF4G1/TBC1D14/TRIOBP/CHMP2A/GIT1/IL1B/RCC2/MYADM/RALB/RNF4/TMC8/NDEL1/VPS4A/MYD88/GSN/TBCD/SAMD1/NUMA1/ATP13A2/ORMDL3/S100A10/TP53/EIF2AK2/DHX33/LRFN3/TIRAP/SSH1/ACTG1/STUB1/VCL/RBM14/MET/PTK2B/SPTBN4/NUP62/DBN1/RHOA/EVL/ESAM/DUSP3/RAPGEF1/VASP/BIN3/TESK1/DNAJA4/SPHK2/ARHGEF18/ULK1/IKBKB/P2RX7/PLEK2/EP300/PARP10/FHOD1/BAX/TICAM1/DCTN1/ABI3/PFN1/SIN3A/LCP1/CHMP4B/SPTBN1/SSH3/CDC42EP2/CLN3/CTTN/FX…
GO:0048699	BP	generation of neurons	930	-0.271285	-1.14404	0.0165289	0.221738	0.198991	1900	tags=16%, list=14%, signal=15%	ARTN/CASZ1/VIM/STK11/ANKS1A/ROBO3/HMG20B/NDEL1/DAGLB/PHGDH/ZMIZ1/PPP1R9B/FYN/B4GALT5/TBCD/TCF4/ASCL2/HERC1/CAMK1/GORASP1/PAK4/EPHA8/XRN2/ERCC2/TP53/RGMA/CTDSP1/EXT1/MYO9A/VCL/ELP3/MET/IER2/PTK2B/SPTBN4/SEMA4B/CRKL/NCAM1/DBN1/RHOA/ACTB/HSP90AB1/CRK/RAPGEF1/VASP/KEL/ULK1/EP300/RAB35/MBP/BAX/CSNK1D/PBX2/ATF5/NRK/EPHB6/DDX56/ROM1/TAOK1/KATNB1/ABI3/SIN3A/KIF13B/LYPLA2/EIF2AK4/FZD7/CTTN/RNF165/ZFHX3/AD…
GO:0015844	BP	monoamine transport	53	-0.508749	-1.58157	0.0169492	0.221883	0.199121	4604	tags=55%, list=34%, signal=36%	SYT11/SLC18A1/OPRK1/OXT/SYT10/SYT7/DRD4/SYT9/DRD3/MAPK15/CNR1/SYT15/CHGA/GABBR1/ITGB3/OXTR/ADRA2A/SYT3/STX1A/ADRA2B/PICK1/GRM2/ACTB/ADORA2A/PINK1/LY6E/SNCA/P2RX1/SYK
GO:0038024	MF	cargo receptor activity	53	-0.508439	-1.5806	0.0169492	0.221883	0.199121	3034	tags=42%, list=23%, signal=32%	LDLR/ASGR2/SCARB1/FOLR2/LGALS3BP/TEX261/AGER/CD6/ABCA7/ASGR1/CD320/CD5/SURF4/CD163/MARCO/CXCL16/LRP10/DAB2/ITGB2/ITGAM/MEGF10/SORL1
GO:0004435	MF	phosphatidylinositol phospholipase C activity	16	-0.65814	-1.57362	0.017094	0.223364	0.200451	3357	tags=56%, list=25%, signal=42%	BDKRB2/PLCH2/CCL5/PLCL2/PLCD1/PLCG1/PLCG2/GDPD5/PLCB2
GO:0065002	BP	intracellular protein transmembrane transport	41	0.553303	1.54543	0.0171233	0.223364	0.200451	2325	tags=34%, list=17%, signal=28%	TOMM7/TRAM1/TOMM20/GRPEL2/DNAJC15/SEC61B/DNAJC19/SEC61G/HSPD1/SEC62/TIMM23/PEX1/SRP54/CHCHD4
GO:0097194	BP	execution phase of apoptosis	58	-0.47523	-1.50594	0.0171569	0.223405	0.200487	2067	tags=33%, list=15%, signal=28%	APAF1/DNASE2/XKR8/ZC3H12A/DFFA/SIRT2/CASP9/MADD/CIDEB/TP53/BAX/BOK/TAOK1/BBC3/ACIN1/DEDD2/SHARPIN/CFLAR/BCL2L1
GO:0070527	BP	platelet aggregation	57	-0.504378	-1.58627	0.0172414	0.223693	0.200745	1691	tags=40%, list=13%, signal=35%	PIK3CG/GP6/SH2B3/CEACAM1/MPL/ACTG1/VCL/TSPAN32/ACTB/EMILIN2/HSPB1/MYL9/FLNA/GNAS/ALOX12/LYN/CSRP1/GATA1/FERMT3/FIBP/SYK/MYH9/TLN1
GO:0045931	BP	positive regulation of mitotic cell cycle	97	0.455702	1.46197	0.0172956	0.223693	0.200745	2286	tags=27%, list=17%, signal=22%	ANXA1/RAB11A/RPS6KB1/DYNLT3/VPS4B/PTPN11/PLRG1/ANAPC4/RRM2B/AIF1/NSMCE2/RB1/FBXO5/RDX/CUL4B/CDC23/MAD2L1BP/CDC7/PKN2/CDC16/RAD51C/PHB2/DDX3X/ANKRD17/RRM1/ANAPC7
GO:0007265	BP	Ras protein signal transduction	266	-0.352093	-1.3456	0.017301	0.223693	0.200745	1931	tags=25%, list=14%, signal=22%	ARHGDIG/DOK2/ARFGAP1/RALB/DOK3/MADD/TP53/NKIRAS2/RGL2/LZTR1/MET/ARRB1/CRKL/NUP62/STK19/RHOA/CRK/RAPGEF1/CDKN1A/ARHGEF18/RAB35/NISCH/RASGRP2/GNA12/RALBP1/RRAS/RGL4/LAT/CDC42EP2/GBF1/RAB4B/RALGDS/RAC2/RFXANK/RAPGEF6/GDI1/KCTD13/ARHGAP4/P2RY8/CDC42EP4/IQSEC1/NOTCH1/PSD4/DBNL/ARHGEF1/TAX1BP3/CBL/DENND3/SETDB1/ROPN1B/GRB2/ARHGEF2/CFL1/MFN2/SQSTM1/ARHGAP1/ITPKB/TRIM28/FBP1/WAS/SH3BP1/FLOT1/DNM2/MYO9B/R…
GO:0051346	BP	negative regulation of hydrolase activity	237	-0.355268	-1.34323	0.0172414	0.223693	0.200745	1594	tags=20%, list=12%, signal=18%	SERPING1/PRDX5/ANXA2/LTF/PCSK1N/CSTB/AIP/RPS6KA1/ARRB2/SPHK2/IKBKB/UBE2O/SIAH2/PPP1R15A/ADORA2A/SPOCK2/BIN1/IFI6/GSK3B/ARL2/STYXL1/TERF2/SNCA/CST3/POR/GAPDH/CST7/PPP1R11/NCKAP1L/FURIN/TNFSF14/SORT1/PLAUR/FKBP1A/SEMA4D/RENBP/MICAL1/GNAI2/GMIP/WNK1/GPX1/GPI/PI3/TIMP1/CTSB/MMP9/SORL1
GO:0005112	MF	Notch binding	17	-0.648849	-1.57146	0.0173913	0.224348	0.201334	1536	tags=29%, list=11%, signal=26%	HIF1AN/NCOR2/NOTCH1/AAK1/MEGF10
GO:0090630	BP	activation of GTPase activity	79	-0.452549	-1.50048	0.0174129	0.224348	0.201334	2655	tags=41%, list=20%, signal=33%	EVI5L/TBC1D22A/TIAM2/SIPA1L1/TBC1D13/EPHA1/SGSM2/TBC1D14/SGSM3/RCC2/TBC1D16/NDEL1/TBC1D2/TBC1D22B/PTK2B/CRKL/CRK/TBC1D3G/TBC1D17/TBC1D2B/RANGAP1/TBC1D25/TBC1D10C/SIPA1/TAX1BP3/SIPA1L3/EVI5/RABGAP1/GMIP/RAP1GAP/RHOG/TBC1D10B
GO:0035770	CC	ribonucleoprotein granule	196	0.401312	1.37429	0.0175182	0.225309	0.202196	2044	tags=27%, list=15%, signal=23%	MBNL1/SNRPG/DCP2/PSMA6/LSM3/LSM1/PSMA4/RPS6/ZFP36L1/XRN1/PSMC2/RPL6/G3BP2/PNRC2/PAN3/PSMA2/ZFAND1/DDX1/LSM14A/YTHDF3/SNRPB2/PUM2/NFKBIZ/RPLP0/CNOT8/UHMK1/GRSF1/G3BP1/TIA1/FXR1/DHX36/FASTKD1/TIAL1/IQGAP1/TDRD7/RPS4X/ROCK1/STAU2/C9orf72/KPNB1/YTHDC2/HNRNPU/NUFIP2/NSUN2/BTBD1/PUM1/CNOT7/RPUSD4/FASTKD3/EID1/EIF2S1/SERPINB1
GO:0071556	CC	integral component of lumenal side of endoplasmic reticulum membrane	26	-0.580408	-1.56596	0.01766	0.226156	0.202956	1150	tags=54%, list=9%, signal=49%	HLA-H/HLA-DRB3/HLA-DRB4/HLA-F/HLA-E/HLA-C/CD74/HLA-B/BCAP31/HLA-A/CALR/TAPBP/HLA-DRB1/HLA-DRB5
GO:0098553	CC	lumenal side of endoplasmic reticulum membrane	26	-0.580408	-1.56596	0.01766	0.226156	0.202956	1150	tags=54%, list=9%, signal=49%	HLA-H/HLA-DRB3/HLA-DRB4/HLA-F/HLA-E/HLA-C/CD74/HLA-B/BCAP31/HLA-A/CALR/TAPBP/HLA-DRB1/HLA-DRB5
GO:0070230	BP	positive regulation of lymphocyte apoptotic process	13	-0.703366	-1.55501	0.0177384	0.226156	0.202956	1718	tags=54%, list=13%, signal=47%	IL10/TP53/P2RX7/BAX/PRELID1/ADAM8/LGALS9
GO:0002532	BP	production of molecular mediator involved in inflammatory response	65	-0.466369	-1.49576	0.0177215	0.226156	0.202956	1285	tags=26%, list=10%, signal=24%	IL4R/TICAM1/ABCD1/CUEDC2/ALOX5/ALOX5AP/BAP1/LYN/P2RX1/GPSM3/PYCARD/NCF1/SYK/STAT3/GRN/KPNA6/IL17RA
GO:0051240	BP	positive regulation of multicellular organismal process	992	-0.263901	-1.11961	0.0176991	0.226156	0.202956	1886	tags=18%, list=14%, signal=16%	TNFRSF8/NFKBID/STK11/JAK1/NDEL1/CARD11/ZMIZ1/MYD88/CD6/B4GALT5/CRLF2/NUMA1/ABCA7/PAK4/IL10/OAS1/USF1/NFAM1/CD84/MAPKAPK2/RGS14/EIF2AK2/HMOX1/DHX33/TIRAP/IRF1/SLC4A2/ANXA2/LTF/CYBA/TRADD/FCER1G/ADIPOR2/PTK2B/LRPAP1/LILRA2/SPTBN4/DBN1/RHOA/AP3D1/CDK9/ARRB2/PDPK1/SPHK2/POLR3A/POU2F2/EMILIN2/IRAK1/TYROBP/NME2/P2RX7/IL4R/BTN3A2/TGM2/HSPB1/MBP/IL18/SLC27A1/NLRP1/TICAM1/TMBIM1/STIM1/SOX12/ZBTB20/HLA-E/B…
GO:0071222	BP	cellular response to lipopolysaccharide	164	-0.36565	-1.34629	0.0178571	0.227276	0.20396	2014	tags=26%, list=15%, signal=23%	LILRB2/GIT1/IL1B/VIM/MYD88/CD6/IL10/SIGIRR/NFKBIB/MAP2K3/LTF/LILRA2/PABPN1/RHOA/IRAK1/IL18/TICAM1/TRIM41/RELA/NFKB1/GSTP1/PLCG2/NR1D1/HCK/LYN/TSPO/CD68/SBNO2/LITAF/GATA1/TNFRSF1B/PYCARD/PAF1/PTAFR/TNIP1/SPI1/NFKBIA/PRPF8/MAPK3/RARA/UPF1/CD14/IRF3
GO:0043177	MF	organic acid binding	91	-0.433394	-1.48124	0.0179487	0.227651	0.204297	1439	tags=20%, list=11%, signal=18%	UROS/OXER1/FOLR3/PLOD3/ALOX5AP/P2RX1/SLC19A1/HBD/HBD/HBZ/PLOD1/IGF2R/RXRA/PADI4/RARA/HBE1/HBM/HBQ1
GO:0033209	BP	tumor necrosis factor-mediated signaling pathway	85	-0.428202	-1.44314	0.0179487	0.227651	0.204297	1690	tags=26%, list=13%, signal=23%	TP53/NKIRAS2/EXT1/TRADD/PTK2B/IKBKB/EIF5A/RELA/GSTP1/RIPK1/LAPTM5/SHARPIN/TNFRSF1A/TNFRSF1B/PIAS4/PYCARD/NFKBIA/SYK/CPNE1/GPS2/ACTN4/FOXO3
GO:0045197	BP	establishment or maintenance of epithelial cell apical/basal polarity	29	-0.577662	-1.58099	0.0180995	0.229118	0.205614	1547	tags=24%, list=12%, signal=21%	MYO9A/RHOA/SLC9A3R1/MARK2/WDR1/SH3BP1/MSN
GO:0010466	BP	negative regulation of peptidase activity	161	-0.372402	-1.3679	0.0181269	0.229118	0.205614	1594	tags=19%, list=12%, signal=17%	SERPING1/PRDX5/ANXA2/LTF/PCSK1N/CSTB/RPS6KA1/ARRB2/UBE2O/SIAH2/ADORA2A/SPOCK2/BIN1/IFI6/SNCA/CST3/POR/GAPDH/CST7/FURIN/TNFSF14/PLAUR/RENBP/MICAL1/GPX1/GPI/PI3/TIMP1/CTSB/MMP9/SORL1
GO:0032391	CC	photoreceptor connecting cilium	26	0.624944	1.57343	0.0182149	0.22915	0.205643	3926	tags=62%, list=29%, signal=44%	KIFAP3/IFT57/TOPORS/TBCC/CETN3/CEP290/MAK/CETN2/BBS4/WDR19/IFT52/ARL3/CETN1/RP1L1/IQCB1/SPATA7
GO:1903426	BP	regulation of reactive oxygen species biosynthetic process	31	-0.553779	-1.53675	0.0182232	0.22915	0.205643	1815	tags=35%, list=14%, signal=31%	FYN/TRAP1/CYBA/RHOA/SPHK2/ABCD1/ALOX5/PLCG2/SNCA/CFLAR/FOXO3
GO:0002250	BP	adaptive immune response	359	-0.32163	-1.27634	0.0181818	0.22915	0.205643	2574	tags=29%, list=19%, signal=24%	MAD2L2/CD27/TNFRSF14/HLA-H/RIPK3/ICAM1/LILRB5/LAT2/PIK3CG/JAM3/NLRP3/IGLL1/LAX1/ZBTB7B/HLA-DRB3/PRKCZ/CTSH/ZP3/TFE3/C1RL/GZMM/EOMES/LTA/AGER/IL27RA/CEACAM1/HLA-DRB4/LILRB2/SLC15A4/IL1B/HLA-F/TREM1/ZNF683/NFKBID/FUT7/ERAP2/MICB/MYD88/FYN/CD6/LAIR1/UNC93B1/IL10/CD84/LAG3/GNL1/TFEB/SERPING1/IRF1/FCER1G/RELB/PTK2B/TAP1/P2RX7/IL4R/BTN3A2/IL18/HLA-E/SUPT6H/TCIRG1/LAT/HLA-DMA/EIF2AK4/CD7/IL6R/HLA-C/NFKB…
GO:0005680	CC	anaphase-promoting complex	17	0.682325	1.57366	0.0184502	0.2301	0.206496	2286	tags=41%, list=17%, signal=34%	ANAPC13/ANAPC4/ANAPC10/CDC26/CDC23/CDC16/ANAPC7
GO:0048821	BP	erythrocyte development	30	-0.559576	-1.53814	0.0183908	0.2301	0.206496	1699	tags=37%, list=13%, signal=32%	ERCC2/KLF2/ZBTB7A/SRF/GATA1/NCKAP1L/TRIM58/EPB42/G6PD/SLC4A1/ALAS2
GO:0071219	BP	cellular response to molecule of bacterial origin	171	-0.355807	-1.31556	0.0185185	0.2301	0.206496	2042	tags=26%, list=15%, signal=23%	SIRT2/LILRB2/GIT1/IL1B/VIM/MYD88/CD6/IL10/SIGIRR/NFKBIB/TIRAP/MAP2K3/LTF/LILRA2/PABPN1/RHOA/IRAK1/IL18/TICAM1/TRIM41/RELA/NFKB1/GSTP1/PLCG2/NR1D1/HCK/LYN/TSPO/CD68/SBNO2/LITAF/GATA1/TNFRSF1B/PYCARD/PAF1/PTAFR/TNIP1/SPI1/NFKBIA/PRPF8/MAPK3/RARA/UPF1/CD14/IRF3
GO:0002429	BP	immune response-activating cell surface receptor signaling pathway	189	-0.351692	-1.30979	0.0184615	0.2301	0.206496	1877	tags=26%, list=14%, signal=23%	NFKBID/STK11/MICB/CARD11/FYN/EIF2B4/NFAM1/PHPT1/FCER1G/LILRA2/CRKL/DUSP3/CD300A/TYROBP/IKBKB/BTN3A2/EP300/BAX/PLCG1/IKBKG/SH2B2/ADA/RELA/NCR3/PLCG2/FCN1/HCK/CREBBP/VAV1/FCHO1/LYN/LAPTM5/SLA2/FPR1/HLA-A/MYO1G/PAK1/NCKAP1L/RBCK1/PRKD2/CSK/CMTM3/SYK/C5AR1/RNF31/WNK1/PRAM1/GPS2/PIK3CD/HLA-DRB1
GO:0002757	BP	immune response-activating signal transduction	189	-0.351692	-1.30979	0.0184615	0.2301	0.206496	1877	tags=26%, list=14%, signal=23%	NFKBID/STK11/MICB/CARD11/FYN/EIF2B4/NFAM1/PHPT1/FCER1G/LILRA2/CRKL/DUSP3/CD300A/TYROBP/IKBKB/BTN3A2/EP300/BAX/PLCG1/IKBKG/SH2B2/ADA/RELA/NCR3/PLCG2/FCN1/HCK/CREBBP/VAV1/FCHO1/LYN/LAPTM5/SLA2/FPR1/HLA-A/MYO1G/PAK1/NCKAP1L/RBCK1/PRKD2/CSK/CMTM3/SYK/C5AR1/RNF31/WNK1/PRAM1/GPS2/PIK3CD/HLA-DRB1
GO:0016323	CC	basolateral plasma membrane	171	-0.351548	-1.29981	0.0185185	0.2301	0.206496	1676	tags=28%, list=13%, signal=25%	ATP12A/ATP2B1/ERBB2/SLC6A9/SLC46A1/SLC38A1/LDLR/CD38/SLC7A7/CD81/ADRA2A/SLC29A1/NOD1/KCNJ16/STX2/SLC43A3/ATP2B4/SLC14A1/SLC16A12/B4GALT1/ATP1A1/SLC13A3/EPB41/SLC4A2/ANXA2/SLC5A6/AQP10/HSP90AB1/ARRB2/STX4/SLC6A6/SLC26A6/BEST1/MAP4K2/SLC7A5/BSG/ORAI1/FLOT2/KCNJ10/SLC16A3/SLC19A1/ABCC3/C5AR1/SLC9A1/FLOT1/MSN/WASF2/SLC4A1
GO:0005774	CC	vacuolar membrane	348	-0.324615	-1.28047	0.0185185	0.2301	0.206496	3055	tags=39%, list=23%, signal=31%	GIMAP5/FLCN/LDLR/VPS33A/ABHD6/RAB12/MANBA/HLA-DOA/SLC22A17/ECE1/BST2/GPR143/ABCB6/SCARB1/CALCOCO2/RNF152/DTX3L/PLD1/AZU1/PLD3/SLC29A3/HPS6/TSPAN1/ANKFY1/PSEN2/RILP/HLA-H/LAMP2/DDOST/ANXA6/STARD3/P2RX4/CLTA/HLA-DRB3/TMEM79/SLC2A6/WDR81/TEX264/ITM2C/GABARAPL1/TPCN2/B4GALT1/HLA-DRB4/RAB5C/CHMP2A/SLC15A4/ATP6V1B2/HLA-F/MAGT1/MAP1LC3A/SLC46A3/VPS33B/DAGLB/VPS4A/ATP13A2/AP1B1/IFITM3/NFAM1/AP2A2/SLC2A8/…
GO:0070372	BP	regulation of ERK1 and ERK2 cascade	193	-0.349546	-1.30088	0.0185759	0.230422	0.206784	2331	tags=24%, list=17%, signal=20%	PRKCZ/MAP2K7/SRC/FBXW7/CCL23/AGER/CEACAM1/NECAB2/FGF23/MAP3K12/IL1B/MFHAS1/ABCA7/RGS14/TIRAP/PTK2B/ARRB1/CRKL/DUSP3/ARRB2/MARCO/ACTA2/RRAS/PTPN1/CD74/VRK3/DAB2/GSTP1/TBC1D10C/NOTCH1/CD4/SLC9A3R1/LYN/GPBAR1/LGALS9/CSF1R/PYCARD/PRKD2/CSK/NLRP12/TNIP1/SYK/GNAI2/C5AR1/MAPK3/CFLAR/HLA-DRB1
GO:0017014	BP	protein nitrosylation	11	0.767597	1.59969	0.0186916	0.230687	0.207022	758	tags=36%, list=6%, signal=34%	S100A8/OXR1/TXN/NCOA7
GO:0018119	BP	peptidyl-cysteine S-nitrosylation	11	0.767597	1.59969	0.0186916	0.230687	0.207022	758	tags=36%, list=6%, signal=34%	S100A8/OXR1/TXN/NCOA7
GO:0001932	BP	regulation of protein phosphorylation	773	-0.273787	-1.14346	0.0186335	0.230687	0.207022	2919	tags=27%, list=22%, signal=22%	FGR/ADAM17/PRKDC/CDKN1C/PLCL2/FIZ1/PTK6/CD81/ADRA2A/GADD45B/NEDD9/CRLF1/GDF1/DDIT4/LILRB4/SPRY4/AZU1/CAMKK2/ZC3H12A/HDAC3/GPRC5B/RAC1/SH2D3C/PRKRIP1/NSD1/CDK5/HEXIM2/GHRL/RAF1/MAD2L2/ZGPAT/TNFRSF14/BRD4/TSPYL2/RIPK3/AKAP13/BAK1/PIK3CG/CBLB/FGD2/LAX1/AKT1S1/PIH1D1/FBXO7/GJC2/PRKCZ/MAP2K7/SRC/EPHA1/TNFRSF10B/RASSF2/SH2B3/LATS2/PARP16/ATP2B4/FBXW7/ADRA2B/AGER/CEACAM1/LILRA5/SIRT2/FGF23/EIF4G1/MAP3K1…
GO:0060260	BP	regulation of transcription initiation from RNA polymerase II promoter	41	0.547052	1.52797	0.0188356	0.231296	0.207569	1425	tags=32%, list=11%, signal=28%	TAF7/SUB1/PSMC6/MED4/ZNF451/MED30/HMGB1/DHX36/TAF5/CAND1/PPM1D/GTF2A2/TAF2
GO:0046324	BP	regulation of glucose import	41	0.545572	1.52384	0.0188356	0.231296	0.207569	2623	tags=32%, list=20%, signal=26%	RPS6KB1/STXBP3/OSBPL8/PTPN11/NFE2L2/MYC/RHOQ/PEA15/IRS2/HK2/ITLN1/PID1/LEP
GO:0071384	BP	cellular response to corticosteroid stimulus	41	0.542845	1.51622	0.0188356	0.231296	0.207569	1719	tags=29%, list=13%, signal=26%	ANXA1/CYP1B1/RPS6KB1/ZFP36L1/KLF9/JAK2/AKR1C3/ACVR1/RAN/ARG1/USP8/HNRNPU
GO:0009628	BP	response to abiotic stimulus	781	-0.280696	-1.17023	0.0188679	0.231306	0.207577	2325	tags=21%, list=17%, signal=19%	MAP2K7/LONP1/SRC/STX1A/TNFRSF10B/RBM4B/HSPA1A/EGLN2/SUV39H2/RAB11FIP5/CLOCK/ATP2B4/SCNN1D/LTA/AGER/CRIP1/MAP3K14/RHBDD1/MPO/JUP/PICK1/SMC1A/SIRT2/XPC/SDF4/BTG2/IL1B/ENG/TNFRSF8/CASP9/METRNL/STK11/CRY2/MICB/MYD88/FYN/GSN/VHL/ASCL2/EIF2B4/AKR1B1/ABCA7/ERCC2/USF1/MPL/TP53/MAPKAPK2/RGS14/MDM4/SLC2A8/HMOX1/PLEKHB1/ACTG1/EXT1/SMPD1/STUB1/IRF1/HIF1AN/RUVBL2/CYBA/FECH/PCSK1N/RELB/PTK2B/RAD9A/PDK3/LTBR/TM…
GO:0071216	BP	cellular response to biotic stimulus	195	-0.350453	-1.30268	0.0189274	0.231648	0.207884	2045	tags=27%, list=15%, signal=23%	SMC1A/SIRT2/MUS81/LILRB2/GIT1/IL1B/VIM/MYD88/CD6/IL10/SIGIRR/NFKBIB/TP53/TIRAP/ATG10/MAP2K3/LTF/LILRA2/PABPN1/RHOA/IRAK1/IL18/TICAM1/TRIM41/RELA/NFKB1/GSTP1/PLCG2/NR1D1/HCK/NOTCH1/GSK3B/LYN/TSPO/CD68/SBNO2/LITAF/GATA1/TNFRSF1B/PYCARD/PAF1/PTAFR/TNIP1/SPI1/NFKBIA/SYK/PRPF8/MAPK3/RARA/UPF1/CD14/IRF3/CDA
GO:0061548	BP	ganglion development	10	0.766154	1.55601	0.0190114	0.232288	0.208458	142	tags=10%, list=1%, signal=10%	CYP1B1
GO:0032396	MF	inhibitory MHC class I receptor activity	12	-0.721737	-1.58335	0.0193966	0.233352	0.209414	2828	tags=67%, list=21%, signal=53%	LILRA3/LILRB5/KIR3DL1/LILRA5/LILRB2/LILRA2/KIR2DS5/LILRB3
GO:0043301	BP	negative regulation of leukocyte degranulation	12	-0.720647	-1.58096	0.0193966	0.233352	0.209414	2073	tags=67%, list=16%, signal=56%	CEACAM1/HLA-F/CD84/HMOX1/CD300A/LGALS9/NCKAP1L/SPI1
GO:0006000	BP	fructose metabolic process	12	-0.720562	-1.58077	0.0193966	0.233352	0.209414	3142	tags=67%, list=24%, signal=51%	ALDOB/ALDOA/GLYCTK/AKR1B1/PFKFB3/PFKFB4/ALDOC/FBP1
GO:0051004	BP	regulation of lipoprotein lipase activity	12	-0.720109	-1.57978	0.0193966	0.233352	0.209414	367	tags=50%, list=3%, signal=49%	APOC1/ABHD5/PCSK5/FURIN/SORT1/NR1H2
GO:0005523	MF	tropomyosin binding	12	-0.719391	-1.5782	0.0193966	0.233352	0.209414	432	tags=25%, list=3%, signal=24%	S100A6/TMOD1/PYCARD
GO:0042058	BP	regulation of epidermal growth factor receptor signaling pathway	50	-0.514057	-1.5743	0.0191847	0.233352	0.209414	2917	tags=38%, list=22%, signal=30%	ADAM17/PTK6/ADRA2A/ZGPAT/CBLB/RHBDF2/FBXW7/CEACAM1/WDR54/NUP62/DUSP3/IFI6/HIP1/CBL/NCF1/PLAUR/MVP/MMP9/SHKBP1
GO:1901184	BP	regulation of ERBB signaling pathway	54	-0.502401	-1.56521	0.0195599	0.233352	0.209414	2917	tags=37%, list=22%, signal=29%	ADAM17/PTK6/RBPJ/ADRA2A/ZGPAT/CBLB/RHBDF2/FBXW7/CEACAM1/WDR54/NUP62/DUSP3/IFI6/HIP1/CBL/NCF1/PLAUR/MVP/MMP9/SHKBP1
GO:0072678	BP	T cell migration	54	-0.49621	-1.54592	0.0195599	0.233352	0.209414	3030	tags=44%, list=23%, signal=35%	CCL5/FADD/ECM1/ADAM17/TNFRSF14/RIPK3/ICAM1/PIK3CG/IL27RA/CD99/CRKL/RHOA/CRK/CD99L2/CXCL16/ADAM8/ITGB7/MYO1G/TNFSF14/PYCARD/ITGAL/WNK1/MSN/PIK3CD
GO:0001510	BP	RNA methylation	48	0.529508	1.5141	0.0192308	0.233352	0.209414	1907	tags=33%, list=14%, signal=29%	RBM15/METTL5/TFB2M/LARP7/EMG1/METTL4/BCDIN3D/TYW3/TARBP1/THUMPD2/FBL/TRMT12/NSUN2/TRMT11/NSUN6/LCMT2
GO:0048469	BP	cell maturation	119	-0.404894	-1.4139	0.0195531	0.233352	0.209414	2046	tags=20%, list=15%, signal=17%	PICK1/SIRT2/ANKS1A/B4GALT5/DMC1/AKR1B1/EPHA8/ERCC2/PTK2B/KLF2/SPTBN4/CEBPA/SLC26A6/ZBTB7A/ABHD2/ROPN1L/REC8/ROPN1B/PPP2R1A/GBA/TRIM58/EPB42/FOXO3/G6PD
GO:0044409	BP	entry into host	117	-0.402467	-1.40308	0.0192308	0.233352	0.209414	1832	tags=25%, list=14%, signal=22%	ITGB5/GSN/IFITM3/SMPD1/NCAM1/SLC1A5/TRIM8/TRIM11/P4HB/CD74/FCN1/TRIM38/BSG/IFITM2/VPS18/CD4/TRIM25/LY6E/SELPLG/CBL/LGALS9/ITGB7/TRIM21/LAMP1/TRIM26/ITGA5/CTSB/ANPEP/HLA-DRB1
GO:0019898	CC	extrinsic component of membrane	222	-0.350521	-1.31868	0.0196078	0.233352	0.209414	2932	tags=32%, list=22%, signal=25%	UBB/FGR/ALOX15B/MGLL/PTK6/UBC/GNG8/SARM1/AZU1/ZC3H12A/KALRN/RPH3A/RAC1/GNGT2/PIK3CG/S100A6/KCNAB2/AP4B1/SRC/WDR81/CDH9/JUP/MFGE8/GNG7/FYN/PIK3C2B/NUMA1/S100A10/SYTL1/PTK2B/CRKL/ASPSCR1/RHOA/GNG5/GOLGA3/ULK1/FOLR3/GRIPAP1/GNA12/NMT1/PACSIN2/GRAMD1A/RNF40/BIN1/TGM3/TNK2/WDR45/GNA15/GNAS/FCN1/HCK/CTNNA1/ACADVL/PIK3R2/HIP1/LYN/SYTL3/SLA2/GNB2/ATG2A/AAK1/NCF1/PLAUR/FKBP1A/SYK/FES/GNAI2/GBA/PIK3CD/RNF10
GO:0010951	BP	negative regulation of endopeptidase activity	155	-0.363149	-1.30913	0.019544	0.233352	0.209414	1594	tags=19%, list=12%, signal=17%	SERPING1/PRDX5/ANXA2/LTF/PCSK1N/CSTB/RPS6KA1/ARRB2/UBE2O/SIAH2/ADORA2A/SPOCK2/BIN1/IFI6/SNCA/CST3/POR/GAPDH/CST7/FURIN/TNFSF14/PLAUR/RENBP/MICAL1/GPX1/GPI/PI3/TIMP1/MMP9/SORL1
GO:1901214	BP	regulation of neuron death	228	-0.345074	-1.30636	0.0196078	0.233352	0.209414	2020	tags=22%, list=15%, signal=19%	EIF4G1/SULT1A3/MAP3K12/BTG2/HLA-F/CASP9/FYN/ATP13A2/IL10/ENO2/TP53/HMOX1/ZNF746/PTK2B/RHOA/AP2B1/HSP90AB1/ARRB2/TYROBP/BAX/DNAJC5/BOK/CHMP4B/CLN3/IKBKG/ADORA2A/CTSZ/MAP3K5/PINK1/HIPK2/CORO1A/DAXX/GSK3B/SNCA/UBE2M/ADAM8/CBL/ITGB2/TNFRSF1B/ITGAM/KIR3DL2/CDC34/HDGF/MAP3K11/GBA/GPI/GRN/BCL2L1/FOXO3/G6PD/SORL1
GO:0030162	BP	regulation of proteolysis	532	-0.3013	-1.22813	0.0196078	0.233352	0.209414	1959	tags=22%, list=15%, signal=19%	RCN3/IL1B/CHFR/NDUFA13/ATP2A3/CASP9/FYN/GSN/APH1A/SERPINA10/NUB1/ATP13A2/S100A10/IL10/CIDEB/TP53/WDR48/RGMA/SERPING1/STUB1/PRDX5/ANXA2/LTF/PCSK1N/PTK2B/CSTB/CEBPA/RHOA/RPS6KA1/HSP90AB1/ARRB2/ZER1/MBP/BAX/NLRP1/CSNK1D/GNA12/APH1B/BOK/DAP/PSME3/ARAF/UBE2O/CLN3/RNF40/SIAH2/FIS1/ADORA2A/SPOCK2/ADRM1/PRELID1/HDAC1/BIN1/CTSZ/NCSTN/BBC3/HDAC6/USP5/MAP3K5/PINK1/HIPK2/DISC1/DAB2/PSENEN/IFI6/GSK3B/HIP1/PPM…
GO:0009986	CC	cell surface	597	-0.294265	-1.2166	0.0194175	0.233352	0.209414	2968	tags=25%, list=22%, signal=20%	RC3H2/ECE1/BST2/CD38/ADAM17/ADAM15/SLC9A3/IL5RA/ASGR2/SCARB1/FOLR2/BTN3A3/CRLF1/CTSG/MPZL1/LILRB4/BTNL3/COL23A1/GPRC5B/ITGA7/PSG3/KCNH2/SPARC/GSR/PSEN2/CD22/CD27/TNFRSF14/HLA-H/ABCG1/SULF2/ICAM1/ITGAX/IGLL1/GP6/CD33/RAMP2/TSPAN14/TNFRSF10B/SDC3/CLSTN1/ADRA2B/AGER/IL27RA/B4GALT1/CEACAM1/LILRA5/CD151/LILRB2/MFGE8/ENG/HLA-F/PLVAP/CEACAM4/MICB/ITGB5/CD6/CRLF2/AAMP/ABCA7/ASGR1/ENO2/CD5/MPL/CD84/RGMA/L…
GO:0002183	BP	cytoplasmic translational initiation	22	0.646894	1.56685	0.019678	0.233808	0.209823	933	tags=32%, list=7%, signal=30%	EIF4A2/EIF3M/DENR/NCK1/EIF3A/RPL13A/MCTS1
GO:1904353	BP	regulation of telomere capping	25	-0.597926	-1.59408	0.0197802	0.234447	0.210396	1272	tags=24%, list=10%, signal=22%	XRCC1/HNRNPD/PNKP/TERF2/USP7/MAPK3
GO:0051085	BP	chaperone cofactor-dependent protein refolding	27	0.62635	1.59136	0.0198915	0.234447	0.210396	695	tags=26%, list=5%, signal=25%	PTGES3/HSPE1/HSPH1/ST13/HSPA8/DNAJB14/HSPA14
GO:0019320	BP	hexose catabolic process	28	-0.580486	-1.59113	0.0199557	0.234447	0.210396	2701	tags=46%, list=20%, signal=37%	GLB1/GALM/GLYCTK/TKTL1/GALT/FUT7/ENO2/TP53/GALK1/PFKP/PFKL/HK3/ENO1
GO:0007520	BP	myoblast fusion	28	-0.576444	-1.58005	0.0199557	0.234447	0.210396	1285	tags=57%, list=10%, signal=52%	EHD2/ADAMTS15/CD53/ADAM12/MAPK14/CD81/CACNA1H/MYOG/PLEKHO1/IL4R/DYRK1B/TNFSF14/EHD1/CFLAR/FLOT1/MYH9
GO:0034250	BP	positive regulation of cellular amide metabolic process	126	0.417449	1.3654	0.0199387	0.234447	0.210396	2187	tags=25%, list=16%, signal=21%	RPL26/EIF3E/RPL5/IFNGR1/CYP1B1/RPS6KB1/EIF4G2/RPS27L/NCK1/SERP1/NFE2L2/METTL5/YTHDF3/KHDRBS1/UHMK1/UPF3B/FXR1/DHX36/IFNG/CNBP/RPS4X/RPS9/HNRNPU/CD28/C1QBP/RPUSD4/THBS1/FASTKD3/NGRN/YTHDF2/NOD2/DDX3X
GO:0009611	BP	response to wounding	401	-0.311101	-1.24325	0.0198413	0.234447	0.210396	2454	tags=23%, list=18%, signal=19%	PIK3CG/ANXA6/P2RX4/GP6/CREB3L2/PAFAH2/SRC/SH2B3/PAPSS2/LMAN1/VKORC1/CORO1B/CLASP1/ST3GAL4/ADRA2B/AGER/B4GALT1/CEACAM1/VWF/CD151/CHMP2A/GIT1/NDEL1/SERPINA10/IL10/USF1/MPL/PABPC4/RGMA/HMOX1/SERPING1/ACTG1/EXT1/SMPD1/VCL/FCER1G/ADIPOR2/RHOA/TSPAN32/ACTB/CRK/CDKN1A/EMILIN2/TYROBP/F5/HSPB1/BAX/GNA12/VASH1/ACTA2/CHMP4B/FZD7/ALOX5/MYL9/ADORA2A/SRF/RANGAP1/ANXA5/FLNA/MAP3K5/CNN2/PLCG2/GNAS/ALOX12/CTNNA1/…
GO:0045597	BP	positive regulation of cell differentiation	577	-0.288021	-1.18548	0.019802	0.234447	0.210396	2169	tags=20%, list=16%, signal=18%	ADRA2B/LTA/AGER/SPEN/PLXND1/SOX13/CEACAM1/SIRT2/EIF4G1/LILRB2/FBXO31/TRIOBP/IL1B/ENG/MYADM/NFKBID/METRNL/STK11/HMG20B/NDEL1/ZMIZ1/LRP3/VHL/TCF4/NUMA1/S100A10/CAMK1/IL10/PA2G4/MPL/RGS14/HIF1AN/LTF/CRKL/CEBPA/DBN1/RHOA/AP3D1/RPS6KA1/HSP90AB1/ARRB2/CRK/TESK1/TYROBP/NME2/SLC6A6/IL4R/TGM2/IL18/CSNK1D/SOX12/BCL9L/SIN3A/RRAS/ASXL2/WDFY2/CEBPD/STAT5B/IL6R/SRF/HDAC1/BIN1/P4HB/PRPF19/ADA/FLNA/CD74/SLITRK1/…
GO:0050778	BP	positive regulation of immune response	396	-0.310747	-1.23795	0.02	0.234592	0.210526	1877	tags=28%, list=14%, signal=25%	LAT2/SPG21/CBLB/CD247/NLRP3/IGLL1/LAX1/PVRIG/HLA-DRB3/RNF185/PRKCZ/SRC/ZP3/C1RL/LTA/IL27RA/CEACAM1/GAB2/SLC15A4/IL1B/HLA-F/NFKBID/STK11/VSIG4/MICB/CARD11/FYN/EIF2B4/IL10/NFAM1/PHPT1/LAG3/TIRAP/SERPING1/RBM14/FCER1G/LILRA2/CRKL/AP1G1/DUSP3/CD300A/SPHK2/STX4/TYROBP/IKBKB/P2RX7/IL4R/BTN3A2/EP300/IL18/BAX/TRIM41/HLA-E/SIN3A/PLCG1/ZBP1/EIF2AK4/IKBKG/STAT5B/SH2B2/ADA/CD74/RELA/HLA-B/NCR3/PLCG2/FCN1/HCK…
GO:0036475	BP	neuron death in response to oxidative stress	26	0.61899	1.55844	0.0200364	0.234644	0.210573	925	tags=27%, list=7%, signal=25%	OXR1/ARL6IP5/LANCL1/NCOA7/ATF4/HIF1A/PARK7
GO:0034709	CC	methylosome	12	0.737459	1.55796	0.0204461	0.23642	0.212167	1575	tags=42%, list=12%, signal=37%	SNRPG/CLNS1A/ERH/SNRPF/SNRPD2
GO:0043517	BP	positive regulation of DNA damage response, signal transduction by p53 class mediator	12	0.737425	1.55789	0.0204461	0.23642	0.212167	1431	tags=50%, list=11%, signal=45%	RPL26/EEF1E1/SPRED1/PYHIN1/DDX5/PMAIP1
GO:2000059	BP	negative regulation of ubiquitin-dependent protein catabolic process	38	0.561906	1.55571	0.0204429	0.23642	0.212167	1718	tags=34%, list=13%, signal=30%	RPL23/RPL5/RPL11/OGT/CAMLG/UCHL5/PARK7/SDCBP/MTM1/WAC/PDCL3/USP14/RPS7
GO:1902905	BP	positive regulation of supramolecular fiber organization	125	-0.38969	-1.36458	0.0202899	0.23642	0.212167	1804	tags=26%, list=13%, signal=22%	GSN/NUMA1/S100A10/MET/PTK2B/RHOA/EVL/VASP/TESK1/FHOD1/DCTN1/KATNB1/PFN1/CDC42EP2/CTTN/CDK5RAP2/BIN1/PXN/HCK/CDC42EP4/ARL2/PPM1F/GRB2/WDR1/PAK1/NCKAP1L/PYCARD/MAGEL2/FES/GPX1/WAS/WASF2
GO:1903320	BP	regulation of protein modification by small protein conjugation or removal	205	0.386885	1.32891	0.0203488	0.23642	0.212167	2226	tags=27%, list=17%, signal=23%	RPL23/RBX1/RPL5/BMI1/RPL11/DNAJA1/UBE2N/PSMD10/PTPN22/BUB3/OGT/RPS20/FBXO33/DCUN1D5/PELI1/GNL3/CAMLG/UBE2V2/NDFIP1/BIRC3/DERL1/TRIP12/UBQLN1/NMI/PRMT3/SPOPL/DCUN1D4/HIF1A/PARK7/PDCD6/GTPBP4/HDAC4/BIRC2/PTEN/ATG5/OTUD4/FBXO5/TOPORS/TANK/MAPK9/RNF20/RIPK2/IVNS1ABP/SKP2/RPS7/ARRDC3/PPIA/UBR5/FBXO4/LRRK2/GLMN/CTR9/NOD2/TNFAIP3/DDX3X/MASTL
GO:0062023	CC	collagen-containing extracellular matrix	260	-0.340829	-1.30198	0.0204082	0.23642	0.212167	4214	tags=37%, list=32%, signal=26%	COL5A3/LAMA5/THBS3/SFRP1/COL7A1/RARRES2/ANG/COL5A1/COL6A3/PCSK6/PLSCR1/ATRN/SERPINE1/NID1/ADAMTS8/PCOLCE/COL9A2/FGA/ADAMTS15/APCS/CPA3/POSTN/COL20A1/MUC2/WNT5B/GREM1/NPPA/SERPINA1/FBLN2/LEFTY2/C1QA/GPC2/F13A1/IMPG2/SEMA7A/COL14A1/ITIH4/TINAG/SERPINB8/TGFBI/C1QB/AEBP1/ECM1/ADAM19/LGALS3BP/CTSG/COL23A1/FBN2/F12/LGALS1/SPARC/SERPINB6/COL18A1/AGRN/ICAM1/S100A6/ANXA6/COLQ/CTSH/ZP3/LTBP4/LRRC15/SDC3/LM…
GO:0030674	MF	protein-macromolecule adaptor activity	240	-0.3418	-1.29558	0.0202703	0.23642	0.212167	1795	tags=25%, list=13%, signal=22%	VHL/APH1A/KLHDC3/ZC3H18/ERCC2/AP2A2/RGS14/TIRAP/STUB1/TRADD/SPTBN4/CRKL/NUP62/AP1G1/DDB1/AP2B1/CRK/BIN3/AP2A1/STX4/AP2S1/STX5/APH1B/LAT/LDLRAP1/ARRDC5/DGCR8/PEF1/SH2B2/NCSTN/AP1G2/FSCN1/HCFC1/DAB2/TRPC4AP/VPS18/DEDD2/HIP1/SLC9A3R1/SLA2/GNB2/FEM1A/AP1M1/ROPN1B/GRB2/STX10/HSH2D/VAMP2/BCL3/COL8A2/CD3E/MAP2K2/NAPA/ARPC4/GATAD2A/SLC9A1/STAT3/MYH9/AP2M1/SLC4A1
GO:0070997	BP	neuron death	260	-0.33734	-1.28865	0.0204082	0.23642	0.212167	2020	tags=22%, list=15%, signal=19%	EIF4G1/SULT1A3/MAP3K12/BTG2/HLA-F/CASP9/FYN/ATP13A2/IL10/ENO2/TP53/HMOX1/ZNF746/PTK2B/RHOA/AP2B1/HSP90AB1/ARRB2/TYROBP/BAX/DNAJC5/NLRP1/BOK/CHMP4B/CLN3/IKBKG/ADORA2A/CTSZ/NCSTN/MAP3K5/PINK1/HIPK2/CORO1A/DAXX/PIGT/GSK3B/SNCA/UBE2M/GAPDH/ADAM8/CBL/ITGB2/TNFRSF1B/ITGAM/KIR3DL2/CDC34/HDGF/MAP3K11/GBA/GPX1/SLC9A1/GPI/GRN/BCL2L1/FOXO3/G6PD/SORL1
GO:0051052	BP	regulation of DNA metabolic process	337	0.357627	1.29235	0.0205479	0.236851	0.212553	1916	tags=21%, list=14%, signal=19%	DCP2/DEK/GZMA/CYP1B1/SUB1/ZMPSTE24/UBE2N/PTGES3/MORF4L1/HNRNPC/XRN1/SIRT1/ACTR2/ANXA3/CCT2/GNL3/UBE2V2/IL7R/MORF4L2/TFRC/NDFIP1/SMARCA5/ACTL6A/TRIP12/PPP2CA/UCHL5/SMCHD1/MYC/SMC3/YEATS4/CEBPG/SLFN11/HMGB1/PDS5A/LPIN1/METTL4/SSBP1/SMARCAD1/DHX36/SMG1/CCDC117/GTPBP4/BMPR2/ZNF91/PTPRC/USP9X/USP1/ESCO1/XRCC5/RPA2/EXOSC3/OTUD4/FBXO5/THOC1/RIF1/PARP9/CCDC88A/CCT8/BRCC3/HNRNPU/CD28/WRN/CDC7/DKC1/MSH6/KL…
GO:0045944	BP	positive regulation of transcription by RNA polymerase II	847	-0.267361	-1.12442	0.0205479	0.236851	0.212553	2631	tags=24%, list=20%, signal=20%	RUNX1/FOSL2/DRAP1/HAND2/THRAP3/DBP/RAF1/ZNF784/ATF6/BRD4/ZBTB17/ZNF827/SREBF2/CEBPB/IRF5/JUNB/AGRN/MPND/ZNF438/E4F1/NLRP3/MC1R/CEBPE/SIRT7/ZBTB7B/CREB3L2/IRF2/GMEB1/KLF6/TFE3/CLOCK/TAF10/EOMES/IKZF3/PPRC1/MLX/ZNF580/ZNF395/TEF/MED19/E2F4/PCBP1/NFIB/JUP/SIRT2/MEPCE/TRERF1/NCOA6/VENTX/ABHD14B/NPAT/IL1B/ENG/TBX19/ASXL1/CASZ1/RNF4/ZNF319/ZMIZ1/ZNF600/MICAL2/TCF4/ZNF76/ASCL2/CAMK1/ASH2L/STAT2/USF1/TP5…
GO:0002385	BP	mucosal immune response	15	0.698563	1.55458	0.0205993	0.237069	0.212749	2155	tags=40%, list=16%, signal=34%	RPL39/RNASE2/CD160/RNASE3/CAMP/NOD2
GO:0044325	MF	transmembrane transporter binding	86	-0.42659	-1.44054	0.0206718	0.23716	0.212831	2466	tags=33%, list=18%, signal=27%	BAK1/USP10/KCNAB2/LRRC26/SRC/STX1A/VDAC1/ATP2A3/CALM1/PPP1R9B/FYN/S100A10/PHPT1/RIMS4/HSP90AB1/FLNA/CALM3/PRKCSH/LYN/TSPO/PYCARD/FKBP1A/DIAPH1/AP2M1/ACTN4/PACS1/GRINA/ACTN1
GO:0045596	BP	negative regulation of cell differentiation	417	-0.307781	-1.2322	0.0206612	0.23716	0.212831	1630	tags=18%, list=12%, signal=16%	CEACAM1/ZHX2/SIRT2/FGF23/IL1B/RCC2/ASXL1/LRP3/ASCL2/GORASP1/TP53/LAG3/CTDSP1/IRF1/SKI/LTF/PTK2B/SEMA4B/CTDP1/RHOA/ULK1/IL4R/MBP/IL18/KLF13/TRIM11/JDP2/TMEM176B/YY1/CMTM5/EIF2AK4/FZD7/STAT5B/CDK5RAP2/PTBP1/CD74/GDI1/NR1D1/ARHGAP4/CTNNA1/ZFPM1/NOTCH1/GSK3B/TMEM176A/LYN/TSPO/TCTA/CALR/LILRB3/DPF2/HLX/PAF1/SORT1/ITPKB/SEMA4D/FOXJ2/NR1H2/GPR137/NFKBIA/RARA/RAP1GAP/STAT3/GPS2/PGLYRP1/ADIPOR1/ACTN4/FOXO…
GO:0019748	BP	secondary metabolic process	32	0.575431	1.53567	0.0207972	0.237526	0.213159	2299	tags=34%, list=17%, signal=29%	CYP1B1/NFE2L2/AKR1C3/CBR4/ATP7A/ZEB2/ARL1/CYP2A7/BCL2/TRPC1/PAM
GO:0031490	MF	chromatin DNA binding	69	-0.46237	-1.48332	0.0208333	0.237526	0.213159	1503	tags=33%, list=11%, signal=30%	RUVBL2/ACTB/EP300/SMARCA4/SRF/HDAC1/RELA/CTCF/SMARCC2/SMARCB1/CREBBP/NOTCH1/MTA2/SMARCD2/SBNO2/GATA1/GATAD2B/CHD4/WBP2/RARA/STAT3/ACTN4/FOXO3
GO:0031109	BP	microtubule polymerization or depolymerization	90	-0.428741	-1.45828	0.0208333	0.237526	0.213159	2266	tags=27%, list=17%, signal=22%	HSPA1A/CLASP1/GIT1/NDEL1/TUBGCP6/TBCD/NUMA1/MID1IP1/MET/CSNK1D/DCTN1/GOLGA2/TAOK1/KATNB1/CDK5RAP2/HDAC6/ARL2/SNCA/TUBGCP2/ARHGEF2/PAK1/FES/NDE1/MAP1S
GO:1901701	BP	cellular response to oxygen-containing compound	829	-0.272269	-1.14055	0.0208333	0.237526	0.213159	1885	tags=19%, list=14%, signal=17%	CASP9/VIM/MAP1LC3A/JAK1/FUT7/NDEL1/MYD88/PPP1R9B/FYN/CD6/IL10/WDTC1/SIGIRR/NFKBIB/USF1/TP53/TRAP1/SLC2A8/MPV17/EIF4EBP2/TIRAP/SSH1/LEPROT/ANKZF1/MAP2K3/PRDX5/LARP1/ATP1A3/LTF/RUVBL2/CYBA/MET/PTK2B/KLF2/LILRA2/PDK3/CRKL/PABPN1/RHOA/ACTB/ARRB2/CRK/RAPGEF1/PDPK1/SPHK2/STX4/IRAK1/P2RX7/SLC26A6/TGM2/IL18/CES1/SLC27A1/TICAM1/TRIM41/ZBTB20/APRT/HNRNPD/CCND3/SIN3A/PTPRE/FZD7/GRAMD1A/PTPN1/STAT5B/SMARCA4/…
GO:0099536	BP	synaptic signaling	446	-0.307834	-1.23917	0.0210084	0.238779	0.214284	2621	tags=20%, list=20%, signal=16%	STX2/CDK5/GHRL/NCDN/CHRNB3/SV2A/AGRN/ITPR3/COLQ/P2RX4/SIPA1L1/PRKCZ/GIPC1/SRC/STX1A/ARF1/PAFAH1B1/GJC1/CLSTN1/ZZEF1/KPNA1/AGER/PTPRA/KIF1B/PICK1/LILRB2/FBXL20/GIT1/IL1B/PCDHB9/GRM2/DAGLB/PPP1R9B/FYN/CADPS/DLGAP4/ZDHHC12/RGS14/EIF4EBP2/EXT1/EIF4A3/PVALB/PTK2B/RIMS4/CRKL/DBN1/RPS6KA1/ARRB2/UNC119/STX4/TYROBP/P2RX7/SLC6A6/MBP/DNAJC5/PACSIN2/EIF2AK4/CLN3/ADORA2A/SRF/NCSTN/RELA/CHRNA2/PINK1/DISC1/GNA1…
GO:0043085	BP	positive regulation of catalytic activity	835	-0.272462	-1.14248	0.020979	0.238779	0.214284	2605	tags=25%, list=19%, signal=22%	CDK5/CRHR1/EPHB4/TBC1D22A/GHRL/RAF1/PSEN2/NLRP2/PREX1/MEFV/RIPK3/AKAP13/TIAM2/AGRN/BAK1/PIK3CG/RASGRP4/FGD2/NLRP3/CD33/SIPA1L1/PIH1D1/CARD8/TBC1D13/PRKCZ/MAP2K7/CTSH/SRC/EPHA1/TNFRSF10B/P2RY11/RASSF2/HSPA1A/PARP16/ATP2B4/FBXW7/ADRA2B/CCL23/AGER/UBE2L3/AVPR2/LILRA5/SGSM2/FGF23/TBC1D14/SGSM3/MAP3K12/RCN3/IL1B/RCC2/NDUFA13/TBC1D16/ATP2A3/RALB/CASP9/STK11/CALM1/NDEL1/MADD/TCL1B/FYN/GSN/APH1A/TBC1D2/S…
GO:0090208	BP	positive regulation of triglyceride metabolic process	11	-0.72934	-1.56728	0.0214133	0.239025	0.214505	3373	tags=82%, list=25%, signal=61%	SREBF1/ABHD5/LDLR/SCARB1/DGAT2/DAGLB/SLC27A1/NR1H2/PNPLA2
GO:0045019	BP	negative regulation of nitric oxide biosynthetic process	12	-0.709222	-1.55589	0.0215517	0.239025	0.214505	3078	tags=58%, list=23%, signal=45%	SIRPA/ZC3H12A/ATP2B4/IL10/GLA/TSPO/KHSRP
GO:1904406	BP	negative regulation of nitric oxide metabolic process	12	-0.709222	-1.55589	0.0215517	0.239025	0.214505	3078	tags=58%, list=23%, signal=45%	SIRPA/ZC3H12A/ATP2B4/IL10/GLA/TSPO/KHSRP
GO:0061577	BP	calcium ion transmembrane transport via high voltage-gated calcium channel	12	-0.708954	-1.5553	0.0215517	0.239025	0.214505	1598	tags=25%, list=12%, signal=22%	CACNG6/BIN1/G6PD
GO:0048027	MF	mRNA 5'-UTR binding	22	0.640088	1.55036	0.0214669	0.239025	0.214505	661	tags=27%, list=5%, signal=26%	RPL26/RPS3A/RPL5/GNL3/RPS14/RPS13
GO:0072683	BP	T cell extravasation	12	-0.705985	-1.54879	0.0215517	0.239025	0.214505	3389	tags=83%, list=25%, signal=62%	F11R/FADD/RIPK3/ICAM1/IL27RA/CD99/CRKL/CRK/CD99L2/ITGAL
GO:1901992	BP	positive regulation of mitotic cell cycle phase transition	73	0.497669	1.5394	0.0213115	0.239025	0.214505	2643	tags=34%, list=20%, signal=28%	ANXA1/RAB11A/VPS4B/PLRG1/ANAPC4/RRM2B/AIF1/NSMCE2/RB1/FBXO5/RDX/CUL4B/CDC23/MAD2L1BP/CDC7/CDC16/RAD51C/PHB2/DDX3X/ANKRD17/RRM1/ANAPC7/APEX1/CPSF3/STIL
GO:0002295	BP	T-helper cell lineage commitment	14	-0.667799	-1.52484	0.0213675	0.239025	0.214505	989	tags=57%, list=7%, signal=53%	LY9/SPN/SLAMF6/IL12RB1/IL6R/STAT6/ZFPM1/STAT3
GO:0046887	BP	positive regulation of hormone secretion	78	0.483512	1.50222	0.0214521	0.239025	0.214505	1252	tags=15%, list=9%, signal=14%	RAB8B/VAMP7/SMAD4/SERP1/JAK2/PTPN11/SNX4/PPP3CB/ACSL4/HIF1A/GLUD1/VAMP8
GO:2001022	BP	positive regulation of response to DNA damage stimulus	91	0.469662	1.48474	0.0212418	0.239025	0.214505	1655	tags=26%, list=12%, signal=23%	RPL26/UBE2N/MORF4L1/SIRT1/NSMCE4A/EEF1E1/ACTR2/UBE2V2/MORF4L2/SPRED1/ACTL6A/SMCHD1/MYC/YEATS4/CEBPG/HMGB1/FXR1/PYHIN1/CCDC117/DDX5/PMAIP1/RIF1/PARP9/BRCC3
GO:0071674	BP	mononuclear cell migration	145	-0.373238	-1.33553	0.0213415	0.239025	0.214505	1455	tags=25%, list=11%, signal=22%	CCL23/AGER/IL27RA/ARTN/FUT7/CD99/EXT1/PTK2B/CRKL/RHOA/CRK/PECAM1/CD99L2/PADI2/ALOX5/IL6R/CXCL16/LYN/ADAM8/LGALS9/CALR/ITGB7/MYO1G/CSF1R/TNFSF14/PYCARD/NLRP12/STK10/ITGAL/SPI1/GBA/C5AR1/WNK1/MAPK3/MSN/PIK3CD
GO:0033218	MF	amide binding	284	-0.326861	-1.26047	0.0214286	0.239025	0.214505	2398	tags=25%, list=18%, signal=21%	CLTA/RAMP2/HLA-DRB3/IPO4/ITM2C/VDAC1/CLSTN1/KPNA1/GSS/AGER/CRIP1/AVPR2/HADHA/TNPO1/LILRB2/HLA-F/RPS6KB2/ERAP2/PTGES2/KDELR1/TIMM22/CD300LF/APBB3/ATP1A3/LRPAP1/UROS/TAP1/GSTM2/FKBP2/AP2B1/HSP90AB1/MARCO/FOLR3/BDKRB1/HLA-E/SRP68/LDLRAP1/TMEM158/HLA-C/CD74/SLC7A5/RELA/SEC61A1/HLA-B/PSAP/TNPO2/ACADVL/APBA3/CST3/PPP3R1/FASN/P2RX1/HLA-A/CALR/ITGB2/VIPR1/ITGAM/SLC19A1/FURIN/FKBP1A/TAPBP/RXRA/NFKBIA/CD14…
GO:0071396	BP	cellular response to lipid	421	-0.31382	-1.25725	0.0211864	0.239025	0.214505	2021	tags=22%, list=15%, signal=20%	FGF23/LILRB2/TRERF1/ATP1A1/GIT1/IL1B/NDUFA13/CASP9/VIM/NCOR1/PRMT2/CRY2/ZMIZ1/MYD88/PPP1R9B/CD6/IL10/SIGIRR/NFKBIB/MAP2K3/ATP1A3/LTF/RUVBL2/PTK2B/LILRA2/PDK3/PABPN1/RHOA/SPHK2/NCOR2/IRAK1/RXRB/EP300/IL18/CES1/TICAM1/TRIM41/PADI2/HNRNPD/FZD7/GRAMD1A/ZBTB7A/CALCOCO1/SMARCA4/HDAC1/SAFB/RELA/HDAC6/NFKB1/TWF2/AHR/DAB2/GSTP1/PLCG2/SAFB2/NR1D1/HCK/VPS18/DAXX/ABHD2/GSK3B/MAP4K1/LYN/GPBAR1/TSPO/CD68/PIM1/…
GO:0033993	BP	response to lipid	638	-0.288977	-1.19617	0.0212766	0.239025	0.214505	2021	tags=20%, list=15%, signal=18%	FGF23/LILRB2/TRERF1/ATP1A1/GIT1/IL1B/ENG/NDUFA13/ASXL1/CASP9/VIM/NCOR1/STK11/PRMT2/CRY2/MICB/ZMIZ1/MYD88/PPP1R9B/GPX3/CD6/IFNAR1/IL10/ENO2/SIGIRR/IL10RA/NFKBIB/MAPKAPK2/TIRAP/MAP2K3/ATP1A3/LTF/RUVBL2/CYBA/PTK2B/LILRA2/PDK3/PABPN1/PMVK/RHOA/SPHK2/NCOR2/IRAK1/P2RX7/RXRB/EP300/MBP/IL18/CES1/BDKRB1/TICAM1/TRIM41/PADI2/HNRNPD/FZD7/GRAMD1A/ZBTB7A/CALCOCO1/STAT5B/SMARCA4/HDAC1/SAFB/RELA/MAPKAPK3/HDAC6/N…
GO:0098552	CC	side of membrane	448	-0.294713	-1.18578	0.0213675	0.239025	0.214505	1833	tags=19%, list=14%, signal=17%	MICB/PPP1R9B/FYN/CD6/CRLF2/ASGR1/CD5/MPL/CD84/LAG3/IL2RB/FCER1G/PTK2B/NCAM1/ASPSCR1/RHOA/CD163/GNG5/IKBKB/P2RX7/IL4R/BTN3A2/GM2A/FOLR3/GNA12/HLA-E/CHMP4B/LDLRAP1/GRAMD1A/PTPN1/IL6R/HLA-C/P4HB/ADA/IL2RG/TGM3/ANXA5/CD74/SLC7A5/MAP3K5/TNK2/HLA-B/GNA15/GNAS/FCN1/HCK/FCGR3A/CD4/HIP1/LYN/GNB2/BCAP31/P2RX1/HLA-A/LITAF/CALR/ITGB2/ITGAM/CD3E/MAP2K2/LAMP1/FKBP1A/CLPTM1/TAPBP/FCGRT/ITGAL/ITGA2B/SYK/FES/GNAI…
GO:0009968	BP	negative regulation of signal transduction	858	-0.270595	-1.14068	0.0211268	0.239025	0.214505	1867	tags=18%, list=14%, signal=16%	NCOR1/STK11/CRY2/FHL2/VHL/MFHAS1/SLC35C1/STK38/ABCA7/STAT2/IL10/OAS1/SIGIRR/TP53/TRAP1/RGS14/PHPT1/LZTR1/HMOX1/TNFAIP8L1/ZNF653/LEPROT/SMPD1/CD300LF/MAP2K3/STUB1/HIF1AN/EIF4A3/SKI/LTF/RUVBL2/MET/LRPAP1/TMEM127/LILRA2/ARRB1/NUP62/RHOA/DUSP3/ARRB2/CD300A/PDPK1/NCOR2/P2RX7/HSPB1/BAX/TMBIM1/PARP14/BOK/PADI2/BCL9L/DUSP8/PTPRE/PSME3/DYRK2/NOMO1/CTTN/ZBTB7A/SIAH2/PTPN1/YWHAB/PPP1R15A/TTLL12/NLRX1/EMD/SM…
GO:0005765	CC	lysosomal membrane	316	-0.32876	-1.27763	0.0216606	0.239509	0.214939	2091	tags=29%, list=16%, signal=25%	TPCN2/B4GALT1/HLA-DRB4/RAB5C/CHMP2A/SLC15A4/ATP6V1B2/HLA-F/MAGT1/SLC46A3/VPS33B/DAGLB/ATP13A2/AP1B1/IFITM3/NFAM1/AP2A2/SLC2A8/TMEM175/TFEB/ATP6V0B/DNAJC13/ANXA2/TOM1/TM9SF1/NEU1/SURF4/ARRB1/AP1G1/AP3D1/AP2B1/HSP90AB1/AP2A1/SPHK2/DNAJC5/AP2S1/TMBIM1/SPNS1/CLEC16A/ABCD1/BRI3/CD63/TCIRG1/CHMP4B/HLA-DMA/CLN3/PLEKHF1/STK11IP/UBA52/TMEM63A/NCSTN/CD74/SLC7A5/SLC44A2/NKG7/GAA/SLC30A3/DAB2/PLEKHM2/PSAP/IF…
GO:0098852	CC	lytic vacuole membrane	316	-0.32876	-1.27763	0.0216606	0.239509	0.214939	2091	tags=29%, list=16%, signal=25%	TPCN2/B4GALT1/HLA-DRB4/RAB5C/CHMP2A/SLC15A4/ATP6V1B2/HLA-F/MAGT1/SLC46A3/VPS33B/DAGLB/ATP13A2/AP1B1/IFITM3/NFAM1/AP2A2/SLC2A8/TMEM175/TFEB/ATP6V0B/DNAJC13/ANXA2/TOM1/TM9SF1/NEU1/SURF4/ARRB1/AP1G1/AP3D1/AP2B1/HSP90AB1/AP2A1/SPHK2/DNAJC5/AP2S1/TMBIM1/SPNS1/CLEC16A/ABCD1/BRI3/CD63/TCIRG1/CHMP4B/HLA-DMA/CLN3/PLEKHF1/STK11IP/UBA52/TMEM63A/NCSTN/CD74/SLC7A5/SLC44A2/NKG7/GAA/SLC30A3/DAB2/PLEKHM2/PSAP/IF…
GO:0070461	CC	SAGA-type complex	24	0.634954	1.56447	0.0218182	0.239804	0.215203	1425	tags=38%, list=11%, signal=34%	ENY2/TAF7/DR1/ZZZ3/POLE4/MAP3K7/TAF5/MBIP/TAF2
GO:0016114	BP	terpenoid biosynthetic process	13	0.709191	1.54178	0.0217786	0.239804	0.215203	784	tags=31%, list=6%, signal=29%	AKR1C3/GGPS1/PRMT3/HMGCS1
GO:0000377	BP	RNA splicing, via transesterification reactions with bulged adenosine as nucleophile	205	0.384844	1.3219	0.0218023	0.239804	0.215203	1999	tags=30%, list=15%, signal=26%	MBNL1/SNRPG/LSM3/RBM25/CLNS1A/HNRNPC/LSM5/PSIP1/SLU7/RBM15/CDC40/FRG1/DDX1/PLRG1/LSM7/HSPA8/PNN/PPWD1/LARP7/STRAP/WBP4/SNRPB2/CWF19L2/RBM17/PTBP2/KHDRBS1/SNRPF/CDC5L/RNPC3/DDX46/PRPF4B/RBM7/TIA1/FXR1/CWC15/SYF2/NCBP2/MAGOH/PRPF18/MBNL2/C9orf78/DDX5/PPIL1/GEMIN6/RSRC1/DYRK1A/COIL/SNRPD2/SNRPN/SNRPA1/HNRNPU/ISY1/C1QBP/CRNKL1/SRPK1/PHF5A/ZCRB1/RBM41/PRPF38A/HNRNPF/PRPF40A
GO:0000398	BP	mRNA splicing, via spliceosome	205	0.384844	1.3219	0.0218023	0.239804	0.215203	1999	tags=30%, list=15%, signal=26%	MBNL1/SNRPG/LSM3/RBM25/CLNS1A/HNRNPC/LSM5/PSIP1/SLU7/RBM15/CDC40/FRG1/DDX1/PLRG1/LSM7/HSPA8/PNN/PPWD1/LARP7/STRAP/WBP4/SNRPB2/CWF19L2/RBM17/PTBP2/KHDRBS1/SNRPF/CDC5L/RNPC3/DDX46/PRPF4B/RBM7/TIA1/FXR1/CWC15/SYF2/NCBP2/MAGOH/PRPF18/MBNL2/C9orf78/DDX5/PPIL1/GEMIN6/RSRC1/DYRK1A/COIL/SNRPD2/SNRPN/SNRPA1/HNRNPU/ISY1/C1QBP/CRNKL1/SRPK1/PHF5A/ZCRB1/RBM41/PRPF38A/HNRNPF/PRPF40A
GO:1903901	BP	negative regulation of viral life cycle	20	-0.631766	-1.59256	0.021978	0.241141	0.216404	1804	tags=45%, list=13%, signal=39%	GSN/IFITM3/TRIM8/TRIM11/FCN1/IFITM2/TRIM25/LY6E/TRIM26
GO:0001959	BP	regulation of cytokine-mediated signaling pathway	116	-0.398181	-1.38733	0.0220386	0.241141	0.216404	1721	tags=28%, list=13%, signal=24%	STAT2/OAS1/SIGIRR/NKIRAS2/CD300LF/TRIM44/HSP90AB1/IRAK1/IKBKB/PARP14/TRIM41/CDC37/PADI2/ZBP1/PTPN1/TTLL12/CD74/GSTP1/IKBKE/RIPK1/LAPTM5/SHARPIN/AGPAT1/TNFRSF1A/PIAS4/ADAR/PYCARD/NR1H2/SYK/CPNE1/GPS2/IRF3
GO:0000793	CC	condensed chromosome	172	0.40183	1.36354	0.0220264	0.241141	0.216404	2230	tags=26%, list=17%, signal=22%	CHMP5/PPP1CC/PPP1R12A/BUB3/XPO1/DYNLT3/NSMCE4A/STAG2/MIS12/HMGB2/CHMP2B/CHMP1B/SMARCA5/NUP37/SMC3/ADD3/HMGB1/NSL1/NUP160/CLASP2/DCTN6/NSMCE2/FBXO28/DCTN4/CENPK/NUP107/DYNC1LI2/KIFAP3/RIF1/SMC6/RAD21/TOPBP1/HNRNPU/SETMAR/NUDCD2/EID3/ITGB3BP/STAG1/SMC2/DYNLL1/MLH3/SUGT1/CLIP1/SS18L1
GO:0004984	MF	olfactory receptor activity	118	-0.399412	-1.39223	0.0222222	0.242427	0.217558	6028	tags=59%, list=45%, signal=33%	OR2A1/OR5D16/OR52M1/OR1S2/OR7G3/OR1L8/OR52K2/OR7G2/OR7A17/OR4K13/OR5D14/OR9G1/OR5M8/OR8K5/OR2B2/OR51I2/OR2M4/OR13C5/OR4X1/OR8H2/OR1J1/OR7E24/OR5A2/OR4C45/OR7G1/OR8J3/OR4F5/OR12D3/OR1J2/OR4D1/OR10A7/OR2A14/OR51D1/OR2T11/OR11H4/OR2L3/OR10H4/OR13C4/OR51M1/OR2AT4/OR51T1/OR3A1/OR1D4/OR10AD1/OR2T6/OR10A2/OR5F1/OR10A6/OR2T12/OR2AG1/OR2T33/OR11A1/OR51S1/OR5AS1/OR4D2/OR4K15/OR4D10/OR52E6/OR11H1/OR13C9/OR5…
GO:0070848	BP	response to growth factor	463	-0.296258	-1.19548	0.0222222	0.242427	0.217558	1953	tags=18%, list=15%, signal=16%	IL1B/ENG/TGFBRAP1/EHD4/STK11/FGFRL1/ITGB5/ZMIZ1/PPP1R9B/FYN/NUMA1/IL10/TP53/MAPKAPK2/RGMA/EXT1/MAP2K3/STUB1/EIF4A3/SKI/IER2/CRKL/HSP90AB1/DUSP3/ARRB2/CRK/RAPGEF1/PDPK1/EP300/RAB35/HSPB1/CSNK1D/BCL9L/PTP4A3/CD63/PLCG1/UBE2O/RNF165/ZFHX3/ZBTB7A/PTPN1/STAT5B/EMD/HDAC1/PXN/NEO1/RELA/HDAC6/CLDN5/HIPK2/TWF2/PPP2R5B/DAB2/CORO1A/CREBBP/NOTCH1/RIPK1/CBL/GLG1/HGS/TNFRSF1B/FIBP/LRG1/FURIN/SORT1/PRKD2/NDST1/…
GO:0003925	MF	G protein activity	33	0.575053	1.53899	0.0226876	0.245743	0.220533	1879	tags=36%, list=14%, signal=31%	RAP2A/RAB10/RAB11A/ARL8B/RAP1B/RAB5A/RAP2C/RALA/RAB4A/NRAS/RAB27A/RIT1
GO:0045824	BP	negative regulation of innate immune response	60	-0.477167	-1.50637	0.0226131	0.245743	0.220533	2073	tags=37%, list=16%, signal=31%	CEACAM1/HLA-F/VSIG4/FAM3A/STAT2/OAS1/SERPING1/ARRB2/CRK/PARP14/HLA-E/TTLL12/NLRX1/TRAFD1/HLA-B/LGALS9/HLA-A/TRIM21/ADAR/KIR2DL4/NR1H2/GRN
GO:0050911	BP	detection of chemical stimulus involved in sensory perception of smell	120	-0.397699	-1.38747	0.0225989	0.245743	0.220533	6028	tags=58%, list=45%, signal=32%	OR2A1/OR5D16/OR52M1/OR1S2/OR7G3/OR1L8/OR52K2/OR7G2/OR7A17/OR4K13/OR5D14/OR9G1/OR5M8/OR8K5/OR2B2/OR51I2/OR2M4/OR13C5/OR4X1/OR8H2/OR1J1/OR7E24/OR5A2/OR4C45/OR7G1/OR8J3/OR4F5/OR12D3/OR1J2/OR4D1/OR10A7/OR2A14/OR51D1/OR2T11/OR11H4/OR2L3/OR10H4/OR13C4/OR51M1/OR2AT4/OR51T1/OR3A1/OR1D4/OR10AD1/OR2T6/OR10A2/OR5F1/OR10A6/OR2T12/OR2AG1/OR2T33/OR11A1/OR51S1/OR5AS1/OR4D2/OR4K15/OR4D10/OR52E6/OR11H1/OR13C9/OR5…
GO:0044297	CC	cell body	368	-0.302219	-1.1998	0.0227273	0.245743	0.220533	1836	tags=15%, list=14%, signal=14%	NDEL1/PPP1R9B/FYN/NUMA1/ATP13A2/RDH5/ENO2/MPL/ATP1A3/EIF4A3/CYBA/PVALB/PTK2B/SPTBN4/HSP90AB1/RPL28/P2RX7/SLC6A6/MBP/GNA12/DCTN1/KATNB1/ACTA2/SIAH2/SLC2A3/ADORA2A/FXR2/HDAC1/FLNA/HDAC6/PINK1/DISC1/HCFC1/PITPNM1/GDI1/DBNL/RAB8A/SNCA/KCNJ10/ATXN10/NDUFS7/TRPV2/TNFRSF1B/ZNF385A/PYCARD/CD3E/RIN3/NCF1/PPP2R1A/PPP1CA/DSCAM/GNAI2/RAP1GAP/MAP1S/SORL1/DPYSL5/NRGN
GO:0005667	CC	transcription regulator complex	372	-0.3009	-1.19654	0.0227273	0.245743	0.220533	2127	tags=23%, list=16%, signal=20%	PBXIP1/MED19/SPEN/E2F4/CORO2A/TRERF1/NCOA6/PMF1/TBX18/NFE2L1/SNAI3/NCOR1/TCF4/ASCL2/GTF2H4/STAT2/TRRAP/ERCC2/USF1/TP53/MDM4/SNAPC4/SKI/MED15/RBM14/IRF9/BCL9/RELB/PHF12/CEBPA/NCOR2/RXRB/EP300/PBX2/ATF5/GTF3C1/PKNOX1/BCL9L/SIN3A/MED24/YY1/GFI1B/ZFHX3/GTF3C5/CEBPD/HDAC1/BIN1/RELA/HIPK2/RFXANK/AHR/HCLS1/SP1/GTF2F1/STAT6/ZFPM1/CREBBP/POU2F1/MTA2/PDLIM1/PTOV1/JUND/GATA1/NFYC/GATAD2B/AATF/XRCC6/CHD4/TRI…
GO:0010648	BP	negative regulation of cell communication	924	-0.265089	-1.1229	0.0227273	0.245743	0.220533	2429	tags=21%, list=18%, signal=19%	CBLB/NLRP3/PIP4K2C/LAX1/TMEM88/AKT1S1/PIH1D1/CARD8/PVRIG/PRKCZ/FKTN/SRC/DHRS3/ARF1/RASSF2/HSPA1A/PAFAH1B1/SH2B3/LATS2/RASA3/RAB11FIP5/CLOCK/ATP2B4/FBXW7/FUZ/AGER/LFNG/SOX13/MARK3/CEACAM1/PICK1/NECAB2/FGF23/LILRB2/GPATCH3/TBX18/IL1B/NDUFA13/ASXL1/MYADM/NCOR1/STK11/CRY2/FHL2/VHL/MFHAS1/SLC35C1/STK38/ABCA7/STAT2/IL10/OAS1/SIGIRR/TP53/TRAP1/RGS14/PHPT1/LZTR1/HMOX1/TNFAIP8L1/ZNF653/LEPROT/SMPD1/CD300L…
GO:0030182	BP	neuron differentiation	889	-0.265626	-1.11958	0.0229008	0.24689	0.221563	1900	tags=16%, list=14%, signal=15%	ARTN/CASZ1/VIM/STK11/ANKS1A/ROBO3/HMG20B/NDEL1/PHGDH/ZMIZ1/PPP1R9B/FYN/B4GALT5/TBCD/TCF4/ASCL2/HERC1/CAMK1/GORASP1/PAK4/EPHA8/XRN2/ERCC2/RGMA/CTDSP1/EXT1/MYO9A/VCL/MET/IER2/PTK2B/SPTBN4/SEMA4B/CRKL/NCAM1/DBN1/RHOA/ACTB/HSP90AB1/CRK/RAPGEF1/VASP/KEL/ULK1/EP300/RAB35/MBP/CSNK1D/PBX2/ATF5/NRK/EPHB6/DDX56/ROM1/TAOK1/KATNB1/ABI3/SIN3A/KIF13B/LYPLA2/EIF2AK4/FZD7/CTTN/RNF165/ZFHX3/ADORA2A/CDK5RAP2/SRF/H…
GO:0071495	BP	cellular response to endogenous stimulus	912	-0.262259	-1.10849	0.0229008	0.24689	0.221563	2331	tags=21%, list=17%, signal=19%	PRKCZ/GIPC1/CTSH/SRC/DENND4C/P2RY11/GALNT3/HSPA1A/EGLN2/ARID1A/LATS2/LTBP4/CLOCK/ATP2B4/CORO1B/PAQR7/SCNN1D/FUZ/AGER/PTPRA/UBE2L3/CYP11A1/CEACAM1/JUP/SMC1A/SIRT2/MUS81/FGF23/SULT1A3/TRERF1/ATP1A1/IL1B/ENG/TGFBRAP1/CASP9/VIM/NCOR1/STK11/PRMT2/JAK1/FUT7/CRY2/FGFRL1/NDEL1/ITGB5/ZMIZ1/PPP1R9B/FYN/NUMA1/EPHA8/WDTC1/USF1/TP53/SLC2A8/RGMA/EIF4EBP2/SSH1/LEPROT/EXT1/STUB1/LARP1/ATP1A3/EIF4A3/SKI/CYBA/ADIP…
GO:0098576	CC	lumenal side of membrane	30	-0.554545	-1.52431	0.0229885	0.247472	0.222085	1150	tags=37%, list=9%, signal=34%	HLA-E/HLA-C/CD74/HLA-B/BCAP31/HLA-A/CALR/TAPBP/CTSA/HLA-DRB1/HLA-DRB5
GO:0002115	BP	store-operated calcium entry	11	-0.720034	-1.54729	0.0235546	0.247937	0.222502	2193	tags=36%, list=16%, signal=30%	ORAI2/CD84/STIM1/ORAI1
GO:1904427	BP	positive regulation of calcium ion transmembrane transport	47	-0.508763	-1.54675	0.0235849	0.247937	0.222502	1392	tags=26%, list=10%, signal=23%	GSTM2/PDPK1/BAX/BDKRB1/STIM1/PLCG1/PLCG2/CALM3/SNCA/P2RX1/SLC9A1/G6PD
GO:1901739	BP	regulation of myoblast fusion	15	-0.659605	-1.54378	0.0235043	0.247937	0.222502	1285	tags=67%, list=10%, signal=60%	EHD2/CD53/MAPK14/MYOG/PLEKHO1/IL4R/TNFSF14/EHD1/CFLAR/FLOT1
GO:0008175	MF	tRNA methyltransferase activity	22	0.636283	1.54115	0.0232558	0.247937	0.222502	3520	tags=68%, list=26%, signal=50%	BCDIN3D/TYW3/TARBP1/THUMPD2/TRMT12/NSUN2/TRMT11/NSUN6/LCMT2/THUMPD3/ALKBH8/METTL6/NSUN3/TRDMT1/TRMT5
GO:0030011	BP	maintenance of cell polarity	15	-0.65723	-1.53822	0.0235043	0.247937	0.222502	657	tags=40%, list=5%, signal=38%	GSK3B/SLC9A3R1/PDLIM1/WDR1/NCKAP1L/SLC9A1
GO:0000314	CC	organellar small ribosomal subunit	26	0.610764	1.53773	0.0236794	0.247937	0.222502	2603	tags=50%, list=19%, signal=40%	MRPS18C/MRPS22/MRPS33/MRPS35/MRPS21/MRPS28/MRPS7/MRPL42/DAP3/MRPS10/MRPS17/MRPS14/MRPS15
GO:0005763	CC	mitochondrial small ribosomal subunit	26	0.610764	1.53773	0.0236794	0.247937	0.222502	2603	tags=50%, list=19%, signal=40%	MRPS18C/MRPS22/MRPS33/MRPS35/MRPS21/MRPS28/MRPS7/MRPL42/DAP3/MRPS10/MRPS17/MRPS14/MRPS15
GO:0007097	BP	nuclear migration	15	-0.6569	-1.53745	0.0235043	0.247937	0.222502	1240	tags=47%, list=9%, signal=42%	PAFAH1B1/FHOD1/DCTN1/NUDC/DYNC1H1/SLC9A3R1/TRIM58
GO:0030225	BP	macrophage differentiation	39	-0.526564	-1.53734	0.0238095	0.247937	0.222502	1409	tags=28%, list=11%, signal=25%	GAB3/CEBPA/HCLS1/CD4/RIPK1/CSF1R/EIF2AK1/SPI1/GBA/HLA-DRB1/MMP9
GO:0045309	MF	protein phosphorylated amino acid binding	47	-0.502538	-1.52782	0.0235849	0.247937	0.222502	1426	tags=30%, list=11%, signal=27%	CRKL/CRK/PFN1/LDLRAP1/YWHAB/PLCG2/HCK/PIK3R2/VAV1/CBL/GRB2/SYK/MAPK3/RTF1
GO:0019433	BP	triglyceride catabolic process	14	-0.666979	-1.52297	0.0235043	0.247937	0.222502	3167	tags=50%, list=24%, signal=38%	ABHD5/LIPE/MGLL/PIK3CG/DAGLB/PNPLA2/SORL1
GO:0033127	BP	regulation of histone phosphorylation	10	-0.718046	-1.51301	0.0231092	0.247937	0.222502	1953	tags=50%, list=15%, signal=43%	IL1B/CDK9/RPS6KA4/AKAP8L/MAPK3
GO:0043303	BP	mast cell degranulation	42	-0.508219	-1.51064	0.0235849	0.247937	0.222502	1683	tags=43%, list=13%, signal=38%	CD84/HMOX1/CD300A/PDPK1/SPHK2/IL4R/LAT/RAC2/LYN/CBL/LGALS9/GATA1/UNC13D/PTGDS/SYK/FES/PIK3CD/STXBP2
GO:0030516	BP	regulation of axon extension	71	-0.455479	-1.46713	0.0234375	0.247937	0.222502	1438	tags=23%, list=11%, signal=20%	SEMA4B/DBN1/SIN3A/CTTN/SRF/DISC1/TWF2/GDI1/ARHGAP4/GSK3B/DBNL/TRPV2/SEMA4D/DSCAM/DNM2/SEMA4A
GO:0002690	BP	positive regulation of leukocyte chemotaxis	72	-0.453161	-1.46397	0.0232558	0.247937	0.222502	989	tags=19%, list=7%, signal=18%	IL6R/CD74/RAC2/DAPK2/LGALS9/CALR/CSF1R/NCKAP1L/GPSM3/TNFSF14/SPI1/C5AR1/WNK1/MAPK3
GO:0007044	BP	cell-substrate junction assembly	71	-0.454135	-1.4628	0.0234375	0.247937	0.222502	2307	tags=25%, list=17%, signal=21%	SRC/CLASP1/PTPRA/TRIP6/RCC2/S100A10/ACTG1/VCL/PTK2B/RHOA/DUSP3/CTTN/TAOK2/PPM1F/SLC9A1/ITGA5/TLN1/ACTN1
GO:0051219	MF	phosphoprotein binding	71	-0.453204	-1.4598	0.0234375	0.247937	0.222502	2671	tags=38%, list=20%, signal=31%	SH2D3C/THRAP3/CBX4/CBLB/PIH1D1/SRC/PAFAH1B1/FBXW7/EPB41/CRKL/CRK/PFN1/LDLRAP1/YWHAB/PLCG2/HCK/PIK3R2/PRKCSH/VAV1/SNCA/LYN/CBL/GRB2/IGF2R/SYK/MAPK3/RTF1
GO:0009185	BP	ribonucleoside diphosphate metabolic process	93	-0.425952	-1.45654	0.0234987	0.247937	0.222502	1964	tags=30%, list=15%, signal=26%	GIT1/ENO3/TPI1/NCOR1/CARD11/PGAM1/ENO2/PGAM4/GALK1/P2RX7/EP300/PFKP/ZBTB20/ZBTB7A/PGM1/ARL2/PFKL/OGDH/GAPDH/HK3/ALDOC/FBP1/GUK1/ENO1/STAT3/GPI/MPP1/SLC4A1
GO:0034248	BP	regulation of cellular amide metabolic process	345	0.35563	1.28819	0.0231293	0.247937	0.222502	2155	tags=24%, list=16%, signal=21%	RPL26/DCP2/EIF3E/RPL5/EIF4A2/IFNGR1/CYP1B1/LSM1/PRNP/SRP9/RPS6KB1/ZFP36L1/ABCE1/EIF4G2/XRN1/RPS27L/NCK1/MTPN/SERP1/ORMDL1/MRPL13/EIF2A/NFE2L2/PRKAA1/PAN3/DDX1/TMED2/NGDN/RPS14/LSM14A/METTL5/RGS2/YTHDF3/DPH5/PDK4/KBTBD8/PUM2/TMED10/ATF4/RPL13A/RPLP1/KHDRBS1/CNOT8/UHMK1/UPF3B/TIA1/FXR1/DHX36/IFNG/CNBP/BANK1/RPS4X/ROCK1/NCBP2/MAGOH/EXOSC8/RPS9/EXOSC3/CNOT6/RPL22/MTIF2/RPS6KA3/BZW2/DPH3/METAP1/HNRNPU…
GO:1902903	BP	regulation of supramolecular fiber organization	260	-0.335635	-1.28214	0.0238095	0.247937	0.222502	2288	tags=29%, list=17%, signal=25%	EPHA1/ARF1/ALMS1/HSPA1A/ARPC1A/ARFIP2/CORO1B/CLASP1/PICK1/TRIOBP/GIT1/MYADM/GSN/TBCD/NUMA1/S100A10/MID1IP1/SSH1/ACTG1/MET/PTK2B/SPTBN4/DBN1/RHOA/EVL/ESAM/VASP/TESK1/ARHGEF18/FHOD1/DCTN1/TAOK1/KATNB1/PFN1/SPTBN1/SSH3/CDC42EP2/CTTN/CDK5RAP2/BIN1/PXN/FLNA/HDAC6/TWF2/HCLS1/CORO1A/HCK/ARPC1B/CDC42EP4/ARL2/DBNL/PPM1F/SNCA/GRB2/ADD1/ARHGEF2/WDR1/COTL1/TMOD1/PAK1/NCKAP1L/PYCARD/SPTAN1/ARPC4/MAGEL2/FLII/C…
GO:0098857	CC	membrane microdomain	245	-0.331789	-1.25467	0.0236486	0.247937	0.222502	1992	tags=21%, list=15%, signal=18%	PRKAR2A/ATP1A1/PLVAP/MYADM/CARD11/FYN/S100A10/ENO2/NFAM1/HMOX1/ANXA2/TUBA1C/TRADD/PTK2B/CRK/IKBKB/PECAM1/STIM1/EFHD2/PACSIN2/LAT/CLN3/HDAC6/HCK/BSG/CTNNA1/ORAI1/STAT6/CD4/RIPK1/SLC9A3R1/LYN/SELPLG/FLOT2/P2RX1/CBL/TNFRSF1A/ITGB2/TNFRSF1B/ITGAM/FURIN/CSK/GNAI2/MAPK3/SLC9A1/CFLAR/FLOT1/CD14/ARID3A/TPP1/CTSD
GO:0050839	MF	cell adhesion molecule binding	405	-0.299643	-1.19986	0.0238095	0.247937	0.222502	1563	tags=20%, list=12%, signal=19%	EEF2/EIF4H/VCL/FXYD5/LARP1/ANXA2/CRKL/DBN1/HSP90AB1/PPME1/ESAM/VASP/GOLGA3/NISCH/CSNK1D/PFKP/STX5/GOLGA2/PFN1/LCP1/EFHD2/PACSIN2/CHMP4B/SPTBN1/LYPLA2/CTTN/NDRG1/PTPN1/YWHAB/EMD/RANGAP1/SCYL1/P4HB/FLNA/CCS/CNN2/FSCN1/TWF2/HCFC1/NUDC/BSG/CTNNA1/SH3GLB2/ATIC/DBNL/TRIM25/LYN/PDLIM1/FASN/NINJ1/ADAM8/CBL/EXOC3/CALR/MARK2/ADD1/LASP1/S100A11/ITGB2/ITGB7/FERMT3/ITGAM/ICAM3/ARHGAP1/SPTAN1/PUF60/EHD1/PPP1CA…
GO:0072359	BP	circulatory system development	733	-0.272305	-1.13281	0.0238095	0.247937	0.222502	1985	tags=16%, list=15%, signal=15%	NCOA6/MFGE8/TBX18/IL1B/ENG/TBX19/ASXL1/STK11/JAK1/FGFRL1/FHL2/ZMIZ1/MICAL2/AAMP/MYBPC3/AP1B1/PAK4/IL10/TP53/MDM4/LGALS12/MEF2D/HMOX1/ACTG1/EXT1/MAP2K3/HIF1AN/ANXA2/ADIPOR2/PTK2B/KLF2/CRKL/CTDP1/RHOA/AP2B1/ARRB2/CDKN1A/PDPK1/SPHK2/EMILIN2/EP300/HSPB1/IL18/BAX/PECAM1/PKNOX1/STIM1/ROM1/VASH1/ACTA2/RRAS/YY1/PLCG1/FZD7/ALOX5/SNX17/TCF25/IL6R/SRF/RIC8A/FLNA/DCTN5/GAA/CLDN5/HIPK2/AHR/RNH1/SP1/BSG/TSC2/Z…
GO:0002253	BP	activation of immune response	250	-0.32705	-1.24319	0.0238908	0.24843	0.222945	1877	tags=24%, list=14%, signal=21%	NFKBID/STK11/VSIG4/MICB/CARD11/FYN/EIF2B4/NFAM1/PHPT1/SERPING1/RBM14/FCER1G/LILRA2/CRKL/DUSP3/CD300A/TYROBP/IKBKB/BTN3A2/EP300/BAX/SIN3A/PLCG1/ZBP1/IKBKG/SH2B2/ADA/RELA/NCR3/PLCG2/FCN1/HCK/CREBBP/VAV1/FCHO1/LYN/LAPTM5/SLA2/FPR1/HLA-A/MYO1G/PAK1/NCKAP1L/RBCK1/PYCARD/PRKD2/CFP/XRCC6/CSK/CMTM3/ZNFX1/SYK/KRT1/C5AR1/RNF31/WNK1/PRAM1/GPS2/PIK3CD/HLA-DRB1
GO:0071467	BP	cellular response to pH	19	-0.629764	-1.56998	0.0240175	0.249041	0.223493	3784	tags=47%, list=28%, signal=34%	KCNK4/HYAL1/HVCN1/GNA11/RAB11FIP5/SCNN1D/AQP10/SLC9A1/MCOLN1
[truncated: 6,625 more rows]

## Sheet: Table S12
Table S12. HALLMARK Gene Set Pattern Analysis Based on Differential Expression Genes Between Subgroup1 (S1) and Subgroup2 (S2)
[truncated: 20 more rows]

[truncated: 3 more sheets: Table S13, Table S14, Table S15]
