# Supplementary material for: Metabolic Pathway Pairwise-Based Signature as a Potential Non-Invasive Diagnostic Marker in AD patients
Source: Preprints.org preprint supplement (doi:10.20944/preprints202305.0837.v1), 2023-05-11
Supplement: Supplementary file 1 [file supplementary › Supplenmentary Figures.pdf]

# **Metabolic Pathway Pairwise-based signature as a potential non-invasive diagnostic marker in AD patients**

Yunwen Feng<sup>1, †</sup>, Xingyu Chen<sup>1, †</sup>, Xiaohua Douglas Zhang<sup>2,\*</sup>, Chen Huang<sup>1,\*</sup>

<sup>1</sup> Dr. Neher's Biophysics Laboratory for Innovative Drug Discovery, State Key Laboratory of Quality Research in Chinese Medicine, Macau University of Science and Technology, Taipa, Macao SAR, 999078, China

<sup>2</sup> Department of Biostatistics, College of Public Health, University of Kentucky, Lexington, KY 40536, USA.

\* Authors to whom correspondence should be addressed.

† These authors contributed equally to this work

## Supplementary Figures

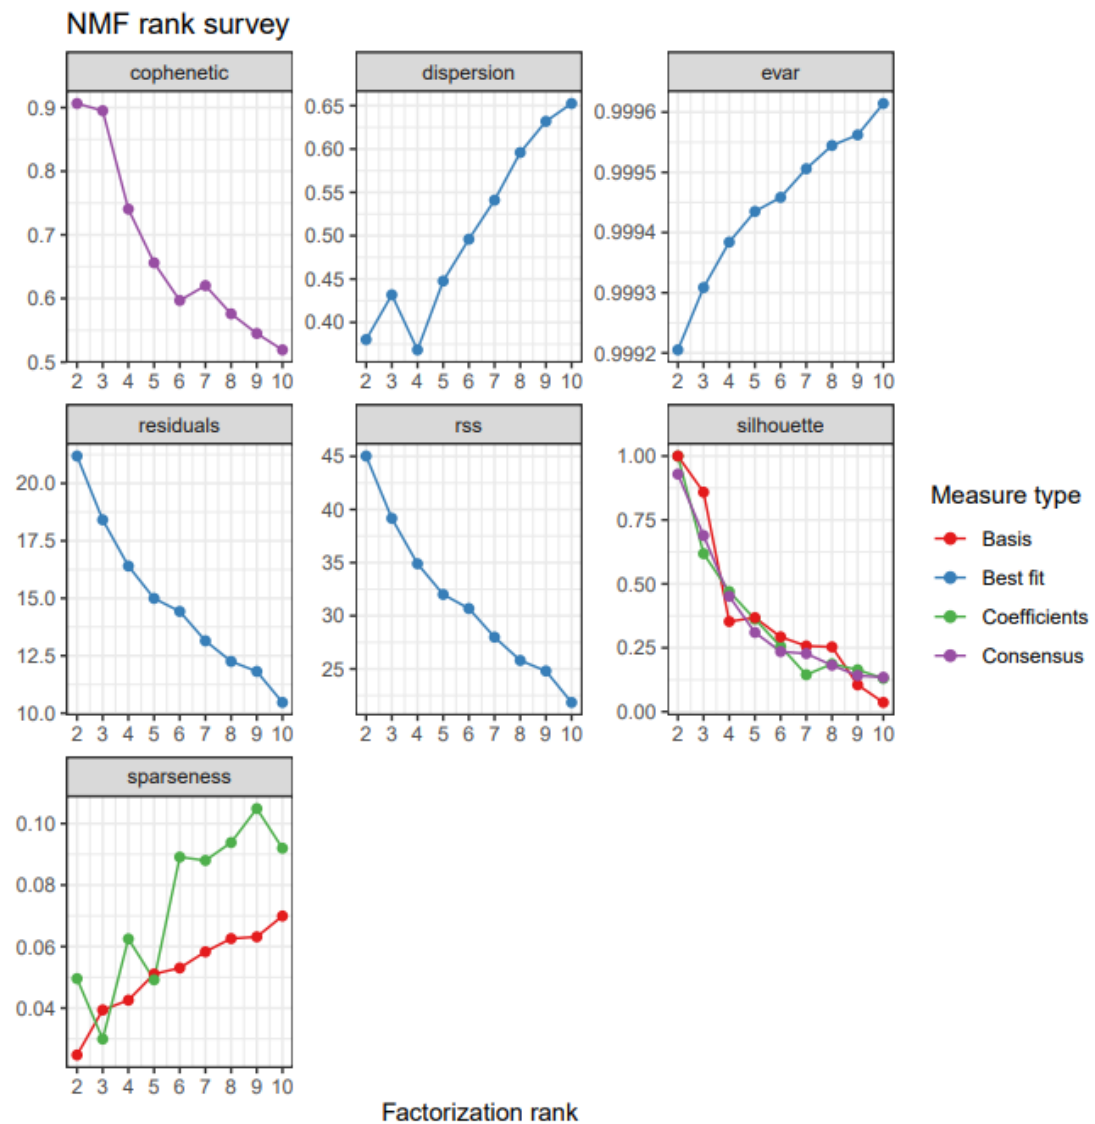

**Figure S1. The cophenetic, dispersion and silhouette indicators determining the optimal clustering number of NMF method.** The estimation is based on Brunet's algorithm. According to the Silhouette Coefficient, the clustering performance is best when there are 2 clusters. NMF, Non-negative Matrix Factorization.

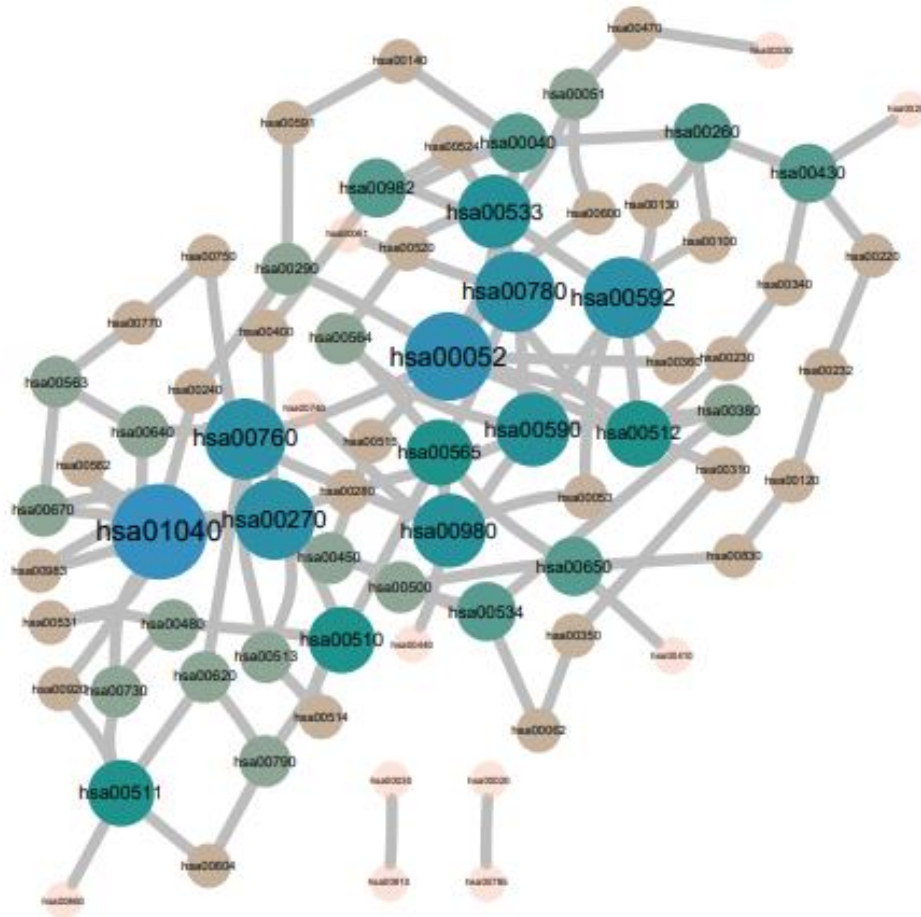

**Figure S2. The metabolic network of differential MPP signatures between AD and non-AD groups revealing key metabolic pathways related to AD.** We used 112 differential MPP signatures generated by chi-square test (adjusted p value < 0.01) between the AD and non-AD groups for metabolic network construction. Hub nodes in the metabolic network have deeper color and larger size. MMP, metabolic pathway pairwise.

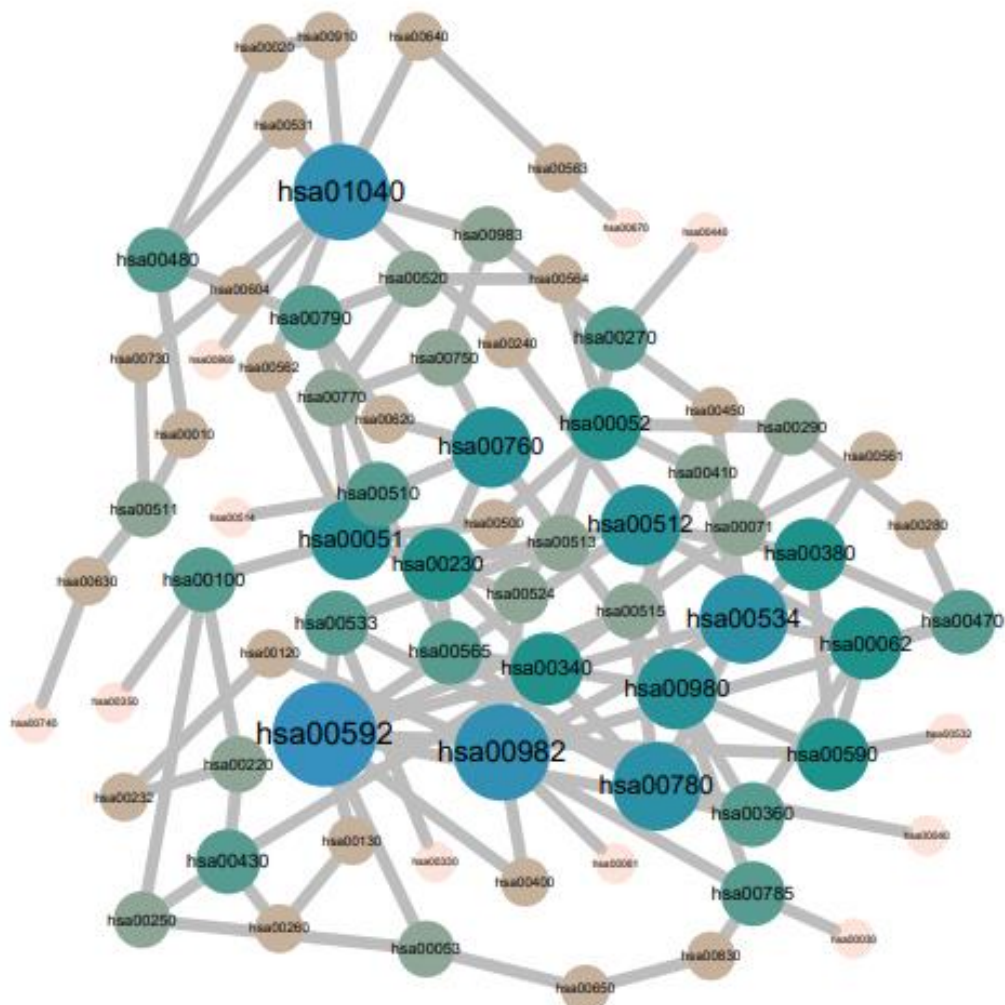

**Figure S3. The metabolic network of differential MPP signatures between S1 and S2 groups revealing important metabolic pathways related to AD.** We used 120 differential MPP signatures generated by chi-square test (adjusted p value < 0.01) between the S1 and S2 groups for metabolic network analysis. The deeper color and larger size reveal hub nodes in the metabolic network.
